# Supplementary material for: Antarctic geothermal soils exhibit an absence of regional habitat generalist microorganisms
Source: bioRxiv preprint, doi:10.1101/2024.06.06.597824, version 2 (2024-10-14)
Supplement: Table S1 [file 597824_file08.xlsx]

## Sheet: otu_table_niche
Supplemental Table 1 Sample abundances (read counts), Silva-based taxonomic predictions, and 16S rRNA gene sequences for all ASVs from this study.
ASV name	TR2-64-1	WC-10-1	TR1-62-2	TR2-44-2	WC-30-2	TR1-52-2	TR1-42-2	TR2-24-2	WC-50-2	WC-40-2	WC-35-2	TR1-32-2	WC-20-2	TR2-34-2	Mel1-3	Mel1M-2	Mel2S-3	Mel3S-1	Ritt1-3	Ritt3-3	Ritt3M-3	Kingdom	Phylum	Class	Order	Family	Genus	Species	16S rRNA gene sequence
ASV_1	0	0	9382	10897	20	5819	3671	730	3156	746	210	26195	0	9897	237	2	4	12	1112	5143	4151	Archaea	Crenarchaeota	Nitrososphaeria	SCGC AB-179-E04	NA	NA	NA	TGGTCGGGACGATTATTGGGCCTAAAGCATCCGTAGCCGGCTTCACAGGTCTCTTGTTAAATCCAACGGCTCAACCGTTGGACCGCAGGAGATACCATGGAGCTAGGGGGCGGGAGAGGCGGACGGTACTCCATGGGTAGGGGTAAAATCCTTTGATCCATGGAAGACCACCAGTGGCGAAGGCGGTCCGCTAGAACGCGCCCGACGGTGAGGGA
ASV_2	0	0	377	68	4224	250	222	11	2731	1147	4217	13	95	47	5633	4864	1657	7631	52	104	209	Bacteria	Firmicutes	Desulfotomaculia	Ammonifexales	NA	NA	NA	CGTTACCCGGATTTACTGGGCGTAAAGCGCGTGTAGGTGGTTGGTTAAGCGTGATGTGAAAGCTTCCGGCTCAACCGGAAAACTGCATTGCGAACTGGCTGACTTGAGGACAGGAGAGGGAAGCGGAATTCCCGGTGTAGCGGTGAAATGCGTAGATATCGGGAGGAACACCAGAGGCGAAGGCGGCTTCCTGGCCTGAACCTGACACTGAGACG
ASV_3	0	0	1551	1690	0	1216	724	13	251	260	148	3927	22	1178	7406	70	210	269	2442	519	179	Bacteria	Chloroflexi	AD3	NA	NA	NA	NA	CGTTACCCGGATTCACTGGGCGTAAAGCGCGTGTAGGCGGCTGGTCAAGCGTGGTGTGAAATCTCCGGGCTCAACCCGGAAACTGCACTGCGAACTGGCCTGGCTGGAGTGCAGGAGAGGGCAGCGGAATTCCCGGTGTAGCGGTGAAATGCGTAGATATCGGGAGGAACACCGGTGGCGAAGGCGGCTGCCTGGCCTGTCACTGACGCTGAGAC
ASV_4	0	0	443	3260	0	3551	3937	1185	0	0	0	1719	0	4474	0	0	0	0	0	39	64	Bacteria	Proteobacteria	Gammaproteobacteria	Xanthomonadales	Rhodanobacteraceae	Mizugakiibacter	NA	CGTTAATCGGAATTACTGGGCGTAAAGCGTGCGTAGGTGGTTCGTTAAGTCCGTTGTGAAAGCCCCGAGCTCAACTTGGGAATTGCAGTGGATACTGATGAGCTGGAGTGCGGTAGAGGAAGGTGGAATTCCCGGTGTAGCGGTGAAATGCGTAGAGATCGGGAGGAACACCAGTGGCGAAGGCGGCCTTCTGGACCAGCACTGACACTCAAGCA
ASV_5	0	0	586	1099	0	858	926	0	1254	868	336	5417	0	25	3137	71	67	105	1806	1377	699	Bacteria	GAL15	NA	NA	NA	NA	NA	CGTTGTCCGGAATCACTGGGCGTAAAGCGCGTGTAGGCGGTTCGGTAAGTCCCGTGTGAAAGCCTACGGCTCAACTGTAGGAGGCCGCGGGATACTGCCGGGCTGGAGGACGGGAGAGGGAAGTGGAATTCCCGGTGTAGCGGTGAAATGCGTAGATATCGGGAGGAACGCCAGTGGCGAAGGCGGCTTCCTGGCCCGTTCCTGACGCTGAGACG
ASV_6	0	0	0	8	0	0	5	0	825	101	30	0	0	0	473	0	0	0	5942	7581	527	Archaea	Crenarchaeota	Nitrososphaeria	Caldiarchaeales	Terrestrial Hot Spring Gp(THSCG)	NA	NA	TGGTCGGGACGATTATTGGGCCTAAAGCATCCGTAGCCGGTCCCGTAAGTCCCCTGTTAAATCCAACGGCTCAACCGTTGGGCTGCAGGGGATACTGCGGGACTAGGGGGCGGGAGAGGCCGCCGGTATTCCCGGGGTAGGGGTAAAATCCTCTGATCCCGGGAGGACCACCAGTGGCGAAGGCGGGCGGCCAGAACGCGCCCGACGGTGAGGGA
ASV_7	0	0	766	2549	0	177	1677	8346	0	0	0	53	0	1838	0	0	0	0	0	0	0	Bacteria	Bacteroidota	Bacteroidia	Chitinophagales	Chitinophagaceae	NA	NA	CGTTATCCGGATTCACTGGGTTTAAAGGGTGCGTAGGTGGGCAGGTAAGTCAGTGGTGAAATCTCCGAGCTTAACTCGGAAACTGCCGTTGATACTATTTGTCTTGAATATTGTGGAGGTAAGCGGAATATGTCATGTAGCGGTGAAATGCTTAGATATGACATAGAACACCAATTGCGAAGGCAGCTTACTACACAACGATTGACGCTGAGGCA
ASV_8	0	0	4603	167	0	1858	511	0	0	0	0	245	0	526	42	44	11	0	4810	1255	1041	Bacteria	Deinococcota	Deinococci	Thermales	Thermaceae	Meiothermus	NA	CGTTACCCGGATTTACTGGGCGTAAAGGGCGTGTAGGCGGTCCTCTAAGTCCAAGGCTAAAGACTAGGGCTCAACCCTGGACCTGCCTCGGATACTGGAGGGCTCGACGGCTGGAGGGGGCAGCGGAATTTCCGGAGTAGCGGTGAAATGCGCAGATACCGGAAGGAACGCCAATAGCGAAGGCAGCTGCCTGGACAGTACGTGACGCTGAGGCG
ASV_9	0	0	2112	878	0	1144	579	15	1173	8	0	1853	0	145	464	370	46	0	1582	2002	1322	Bacteria	Armatimonadota	Chthonomonadetes	Chthonomonadales	Chthonomonadaceae	Chthonomonas	NA	CGTTGTCCGGATTTACTGGGCGTAAAGGGCGCGTAGGCGGGCTAGAGGGTCTGCTGTGAAATTTTGGGGCTCAGCCCCAAGTTGTCGGCAGAAACCGCTAGTCTTGAAGCAGCTAGGGGGAGATGGAATTACCGGTGGAGCGGTGAAATGCGTAGAGATCGGTAGGAACACCCGTGGCGAAGGCGGTCTCCTGGGGCTGTCTTGACGCTGAGGCG
ASV_10	0	0	2291	74	166	2643	315	18	283	451	384	0	8	131	572	690	30	0	25	186	4664	Bacteria	Cyanobacteria	Cyanobacteriia	Leptolyngbyales	Leptolyngbyaceae	Leptolyngbya PCC-6306	NA	CGTTATCCGGAATTATTGGGCGTAAAGCGTCCGTAGGTGGCGATACAAGTCTGTTGTTAAAGCGTGCGGCTCAACCGCATAAGGGCAATGGAAACTGTATGGCTAGAGTGCGATAGGGGTCACAGGAATTCCCAGTGTAGCGGTGAAATGCGTAGATATTGGGAAGAACACCAGCGGCGAAAGCGTGTGACTGGGTCTGCACTGACACTGAGGGA
ASV_11	0	0	0	0	1283	0	0	0	1184	295	799	0	240	0	1146	1653	1954	4068	0	21	91	Bacteria	Proteobacteria	Gammaproteobacteria	Gammaproteobacteria Incertae Sedis	Unknown Family	Acidibacter	NA	CGTTAATCGGAATTACTGGGCGTAAAGCGTGCGTAGACGGTTATGTAAGTCGGGTGTGAAAGCCCCGGGCTCAACCTGGGAATGCCATTCGAAACTGCATAGCTAGGGTGCGGAAGAGGGAAGCGGAATTTCAGGTGTAGCGGTGAAATGCGTAGATATCTGAAGGAACACCAGTGGCGAAAGCGGCTTCCTGGTCCAGCACCGACGTTCAGGCA
ASV_12	0	0	0	0	55	0	0	0	1423	218	145	0	0	0	990	1955	642	83	0	235	6877	Bacteria	Cyanobacteria	Cyanobacteriia	Cyanobacteriales	Nostocaceae	NA	NA	CGTTATCCGGAATGATTGGGCGTAAAGCGTCCGCAGGTGGCAGTGAAAGTCTGCTGTTAAAGAGTCTGGCTCAACCAGATAAAGGCAGTGGAAACTACACAGCTAGAGTGCGTTCGGGGTAGAGGGAATTCCTGGTGTAGCGGTGAAATGCGTAGAGATCAGGAAGAACACCGGTGGCGAAGGCGCTCTACTAGGCCGCAACTGACACTGAGGGA
ASV_13	0	0	2019	1699	0	1575	1265	61	137	1574	13	3576	0	342	8	0	0	0	46	32	92	Bacteria	Chloroflexi	Ktedonobacteria	Ktedonobacterales	Ktedonobacteraceae	FCPS473	NA	CGTTGTCCGGAGTTACTGGGCGTAAAGGGCACGCAGGCGGTCGGTCGCGTTGCCACTGACAGCCGTCGGCTTAACTGACGGAGGTGGGGCAAAACGGGCCGACTTGAGGCTCAGAGAGGCAGACGGAATTCCGCGTGGAGCGGTGAAATGCGTAGAGATGCGGAAGAACACCAAAGGCGAAGGCAGTCTGCTGGCTGAGAGCTGACGCTCAGGTG
ASV_14	0	0	6	5	0	12	11	0	289	127	4	5	0	3	42	0	0	0	6329	4943	209	Bacteria	NA	NA	NA	NA	NA	NA	CGTTACCCGGATTTACTGGGCGTAAAGGGTCCGCAGGCGCCCGGCAAGTCGGGCGTGAAATCCCTCGGCTTAACCGAGGAACGGCGTCCGATACTACCGGGCTTGAGGACGGGAGAGGGAGGTGGAATTCCCGGAGTAGCGGTGAAATGCGTAGATACCGGGAGGAACACCGGTGGCGAAGGCGGCCTCCTGGCCCGTTCCTGACGCTCAGGGAC
ASV_15	0	0	16	15	23	8	72	0	1663	269	299	0	204	0	1438	2688	1661	2171	56	163	842	Bacteria	Acidobacteriota	Acidobacteriae	Subgroup 2	NA	NA	NA	CGTTGTTCGGAATTACTGGGTGTAAAGGGTTCGTAGGCGGTGTAGCAAGTCGGGAGTGAAATCTATGGGCTTAACCCATAGGCTGCTTCCGAAACTGCTGTGCTTGAGTGTGGGAGAGGCGCGTGGAATTGCAGGTGTAGCGGTGAAATGCGTAGATATCTGCAGGAACACCCGTGGCGAAAGCGGCGCGCTGGACCACTACTGACGCTGAGTGA
ASV_16	0	0	0	0	39	0	0	0	2035	290	274	0	4	0	2615	4264	1697	202	0	0	0	Bacteria	Cyanobacteria	Cyanobacteriia	Cyanobacteriales	Nostocaceae	NA	NA	CGTTATCCGGAATGATTGGGCGTAAAGCGTCCGCAGGTGGCAGTGAAAGTCTGCTGTTAAAGAGTCTGGCTCAACCAGATAAAGGCAGTGGAAACTACACAGCTAGAGTGCGTTCGGGGTAGAGGGAATTCCTGGTGGAGCGGTGAAATGCGTAGAGATCAGGAAGAACACCGGTGGCGAAGGCGCTCTACTAGGCCGCAACTGACACTGAGGGA
ASV_17	0	0	0	0	1208	0	0	0	2240	467	1189	0	99	0	521	1545	1129	2897	0	0	0	Bacteria	Acidobacteriota	Acidobacteriae	Acidobacteriales	Koribacteraceae	Candidatus Koribacter	NA	CGTTGTTCGGAATTATTGGGCGTAAAGGGCGCGTAGGCGGTGCGGTAAGTCTTCTGTGAAATCTCCGGGCTCAACTCGGAGCCTGCAGGGGAAACTGCCGTGCTGGAGTATGGGAGAGGTGAGTGGAATTCCCGGTGTAGCGGTGAAATGCGTAGATATCGGGAGGAACACCTGTGGCGAAAGCGGCTCACTGGACCATTACTGACGCTGATGCG
ASV_18	0	0	189	741	0	1977	2392	0	0	0	0	5347	0	308	0	23	0	0	83	25	0	Archaea	Crenarchaeota	Nitrososphaeria	Nitrososphaerales	Nitrososphaeraceae	Candidatus Nitrososphaera	NA	TGGTCGGGACGATTATTGGGCCTAAAGCATCCGTAGCCTGTCCTGCAAGTCTTCCGTTAAATCCACCTGCTTAACAGATGGGCCGCGGAGGATACTACAGGGCTAGGAGGCGGGAGAGGCAAACGGTACTCAGTGGGTAGGGGTAAAATCCACTGATCCACTGAAGACCACCAGTGGCGAAGGCGGTTTGCCAGAACGCGCTCGACGGTGAGGGA
ASV_19	0	0	1489	1981	0	3967	604	0	0	0	0	2313	0	121	0	0	0	0	0	0	0	Archaea	Crenarchaeota	Nitrososphaeria	SCGC AB-179-E04	NA	NA	NA	TGGTCGGGACGATTATTGGGCCTAAAGCATCCGTAGCCGGCTTCACAGGTCTCTTGTTAAATCCAACGGCTCAACCGTTGGACCGCAGGAGATACCATGGAGCTAGGGGGCGGGAGAGGCGGACGGTACTCCATGGGTAGGGGTAAAATCCTTTGATCCATGGAAGACCACCAGTGGCGAAGGCGGTCCGCTAGAACGCGCCTGACGGTGAGGGA
ASV_20	0	0	0	0	812	0	0	0	673	890	469	0	23	0	3753	1256	154	73	43	84	1301	Bacteria	WPS-2	NA	NA	NA	NA	NA	CGTTATTCGGAATCATTGGGCGTAAAGCGCTCGTAGGCGGATCAGCAAGTCGGTGAAGAAAGACCCGGGCTCAACTCGGGGAACGGCACCGATACTGTTGGTCTTGAGGCAATCAGAGGGTAATGGAATTCCCGGTGTAGCGGTGAAATGCGTAGATATCGGGAGGAACACCAGTGGCGAAGGCGATTACCTGGGGTTGATCTGACGCTGAGGAG
ASV_21	0	0	5324	34	0	2495	820	40	0	0	0	5	0	320	0	0	0	0	64	156	260	Bacteria	Deinococcota	Deinococci	Thermales	Thermaceae	Meiothermus	NA	CGTTACCCGGATTTACTGGGTGTAAAGGGCGTGTAGGCGGATACTCAAGTCCGGTGCTAAAGACTGGGGCTCAACCCCAGGAGTGCGCTGGATACTGGGTGTCTAGACGGTCGGAGAGGGCAGCGGAATTCTCGGAGTAGCGGTGAAATGCGCAGATACCGAGAGGAACGCCGATAGCGAAAGCAGCTGCCTGGACGATTGGTGACGCTGAGGCG
ASV_22	0	0	0	0	574	0	0	0	0	1392	111	0	5824	0	167	476	529	212	0	182	0	Bacteria	Proteobacteria	Alphaproteobacteria	Rhizobiales	Beijerinckiaceae	Methylovirgula	NA	CGTTGTTCGGAATCACTGGGCGTAAAGCGCACGTAGGCGGATTCTTAAGTCAGGGGTGAAATCCCGAGGCTCAACCTCGGAACTGCCTTTGATACTGGGGATCTCGAGTCCGGGAGAGGTGAGTGGAATTGCGAGTGTAGAGGTGAAATTCGTAGATATTCGCAAGAACACCAGTGGCGAAGGCGGCTCACTGGCCCGGTACTGACGCTGAGGTG
ASV_23	0	0	0	0	323	0	0	0	0	2510	2577	0	1412	0	0	347	945	1170	0	0	7	Bacteria	GAL15	NA	NA	NA	NA	NA	CGTTGTCCGGAATTACTGGGCGTAAAGCGCGTGTAGGCGGCCTGGTAAGTCCCGTGTGAAAGCCTACGGCTCAACTGTAGGAGGTCGCGGGATACTGCTAGGCTTGAGGGCAGGAGAGGGAAGTAGAATTCCCGGTGTAGCGGTGAAATGCGTAGATATCGGGAGGAATGCCAGTGGCGAAGGCGGCTTCCTGGCCTGTCCCTGACGCTGAGACG
ASV_24	0	0	0	0	869	0	0	0	845	686	775	0	32	0	2024	2274	544	564	58	51	511	Bacteria	Deinococcota	Deinococci	Thermales	Thermaceae	Meiothermus	NA	CGTTACCCGGATTTACTGGGTGTAAAGGGCGTGTAGGCGGCTTCTCAAGTCCGGTGCTAAAGACCGAGGCTCAACCTCGGGAGTGCGCTGGATACTGTGGGGCTAGACGGTCGGAGAGGGCAGCGGAATTCTCGGAGTAGCGGTGAAATGCGCAGATACCGAGAGGAACGCCGATAGCGAAAGCAGCTGCCTGGACGATTTGTGACGCTGAGGCG
ASV_25	0	0	266	614	0	2846	2826	15	0	0	0	953	0	1171	0	0	0	0	0	10	0	Bacteria	Verrucomicrobiota	Verrucomicrobiae	Chthoniobacterales	Chthoniobacteraceae	Candidatus Udaeobacter	NA	CGTTGTTCGGATTCATTGGGCGTAAAGGGTGCGTAGGCGGCGCGGTAAGTCGGGTGTGAAATCTCGGAGCTTAACTCCGAAACTGCATTCGATACTGCCGCGCTCGAGGACTGGAGAGGAGACTGGAATTCACGGTGTAGCGGTGAAATGCGTAGATATCGTGAGGAAGACCAGTGGCGAAGGCGGGTCTCTGGACAGGTCCTGACGCTGAGGCA
ASV_27	0	0	0	0	443	0	0	0	45	1024	577	0	1271	0	39	967	1485	1488	0	0	0	Bacteria	Chloroflexi	AD3	NA	NA	NA	NA	CGTTATCCAGATTTACTGGGCGTAAAGCGCGTGTAGGCGGCTGGTTAAGTGTGATGTGAAATCCTCGGGCTCAACCCGAGAACTGCATTGCAAACTGGCCTGGCTAGAGTGCAGGAGAGGGAAGCGGAATTCCAGGTGTAGCGGTGAAATGCGTAGATATCTGGAGGAACACCAGTGGCGAAGGCGGCTTCCTGGCCTGTAACTGACGCTGAGAC
ASV_28	0	0	0	0	216	0	0	0	788	972	1207	0	812	0	580	1381	522	325	0	292	98	Bacteria	Planctomycetota	Planctomycetes	Gemmatales	Gemmataceae	NA	NA	CGTTGTTCGGATTCACTGGGCTTAAAGGGCGCGTAGGCGGCTCGCCAAGTCAGGGGTGAAATCTTTCGGCTTAACCGGAAAACAGCTTCTGATACTGGCGGGCTAGAGGGAGGTAGGGGCATGTGGAACTTCCGGTGGAGCGGTGAAATGCGTAGATATCGGAAGGAACGCCGGTGGCGAAAGCGACGTGCTGGACCTCTTCTGACGCTGAGGCG
ASV_29	0	0	490	616	0	625	515	0	0	0	0	1882	0	2703	0	0	0	0	0	0	0	Bacteria	Chloroflexi	Chloroflexia	Thermomicrobiales	Thermomicrobiaceae	Nitrolancea	NA	CGTTGTCCGGAGTTACTGGGCGTAAAGGGCGCGTAGGCGGTTGCCCCGCGTCGCACGTGAAAGCCCCCGGCTCAACCGGGGAGGGTCGTGCGAGACGGGGCAACTGGAGGCAGGGAGAGGCTGGTGGAATTCCCGGTGTAGTGGTGAAATGCGTAGAGATCGGGAGGAACACCTGAGGCGAAGGCGCCAGCTGGCCCTGTCCTGACGCTGAGGCG
ASV_30	0	0	0	0	1281	0	0	0	1246	0	1233	0	0	0	339	796	0	1833	0	25	0	Bacteria	Chloroflexi	Ktedonobacteria	Ktedonobacterales	Ktedonobacteraceae	NA	NA	CGTTGTCCGGATTTATTGGGCGTAAAGGGCACGCAGGCGGTCTGCGCATTCGCGGTGACAGTTTTCGGCTTCCCTGAGAAAGGGTCGCGACGATGGGCAGACTTGAGGACCAGAGAGGAAACGGGAACTCCGGGTGGAGTGGTGAAATGCGTAGATATCCGGAAGAACACCCATGGCGAAGGCACGTTTCTGGCTGGTTACTGACGCTCAGGTGC
ASV_32	0	0	668	242	0	2822	1022	6	7	0	0	367	0	862	6	0	0	0	555	89	85	Bacteria	Chloroflexi	KD4-96	NA	NA	NA	NA	CGTTGTCCGGATTTACTGGGCGTAAAGAGCGCGCAGGCGGTCGGCCAAGTCGAGTGTGAAAGCCCCCGGCTCAACTGGGGAGGGTCACTCGATACTGGTCGACTCGAAGGCGGGAGAGGGAAGCGGAATTCCCGGTGTAGCGGTGAAATGCGTAGATATCGGGAGGAACACCAGTGGCGAAGGCGGCTTCCTGGCCCGTTCTTGACGCTGAGGCG
ASV_33	0	0	0	0	1678	0	0	0	1078	24	481	0	209	0	24	280	960	1905	0	0	0	Bacteria	Acidobacteriota	Acidobacteriae	Subgroup 2	NA	NA	NA	CGTTGCTCGGAATTACTGGGCGTAAAGGGTTCGTAGGCGGTGCGGCAAGTCGGGGGTGAAATCTTTGGGCTTAACCCAGAGGCTGCCTTCGAAACTGCCGTGCTCGAGTGCGGGAGAGGCGAGTGGAATTGCAGGTGTAGCGGTGAAATGCGTAGATATCTGCAGGAACACCCGGGGCGAAGGCGGCTCGCTGGACCGCAACTGACGCTGAGGAA
ASV_34	0	0	0	0	38	0	0	0	488	55	41	0	53	0	3	373	3245	1906	0	0	0	Bacteria	Chloroflexi	NA	NA	NA	NA	NA	CGTTATCCGGATTTACTGGGCGTAAAGCGTGTGCAGATGGGGCGGTAAGTGGTGTATGAAAGCGCCAAGCTTAACTTGGCAGGGGTATGCCAGACTGCCGTTCTAGAGACAGGGAGAGGGACGTGGAATGCCGGGTGTAGTGGTGAAATGCGTAGAGCTCCGGCAGAACCTCAGAGGCGAAGGCGGCGTCCTGGCCCTGATCTGACATTCAGACA
ASV_35	0	0	103	433	216	0	80	66	0	0	160	101	40	648	462	408	657	463	0	164	1970	Bacteria	Proteobacteria	Alphaproteobacteria	Rhizobiales	Xanthobacteraceae	Bradyrhizobium	NA	CGTTGCTCGGAATCACTGGGCGTAAAGGGTGCGTAGGCGGGTCTTTAAGTCAGGGGTGAAATCCTGGAGCTCAACTCCAGAACTGCCTTTGATACTGAAGATCTTGAGTTCGGGAGAGGTGAGTGGAACTGCGAGTGTAGAGGTGAAATTCGTAGATATTCGCAAGAACACCAGTGGCGAAGGCGGCTCACTGGCCCGATACTGACGCTGAGGCA
ASV_36	0	0	105	654	0	39	413	568	0	0	0	4	0	4017	0	0	0	0	0	0	0	Archaea	Crenarchaeota	Nitrososphaeria	Nitrososphaerales	Nitrososphaeraceae	Candidatus Nitrocosmicus	NA	TGGTCGGGACGTTTATTGGGCCTAAAGCATCCGTAGCCGGTTCTACAAGTCTTCCGTTAAATCCAGCTGCTTAACAGATGGGCTGCGGAAGATACTATGGAGCTAGGAGGCGGGAGAGGCAAGCGGTACTCGATGGGTAGGGGTAAAATCCGTTGATCCATTGAAGACCACCAGTGGCGAAGGCGGCTTGCCAGAACGCGCTCGACGGTGAGGGA
ASV_37	0	0	72	582	12	1897	944	12	174	296	255	143	333	1026	4	7	34	0	0	0	0	Bacteria	Chloroflexi	Anaerolineae	NA	NA	NA	NA	CGTTATTCGGATTTACTGGGCGTAAAGCGCACCGAGGTGGCTTCTTAAGTTGGATGTAAAATCTCCCGGCTTAACTGGGAGGCGCCATTCAAAACTGAGGAGCTTGAGGTCAGCAGGGGAAAGTGGAATTCCCGGTGTAGTGGTGGAATGCGTAGAGATCGGGAGGAACACCAGTGGCGAAAGCGGCTTTCTGGGCTGCACCTGACACTCTAGTG
ASV_38	0	0	0	0	30	0	0	0	1072	1941	1211	0	595	0	157	293	218	233	0	0	0	Bacteria	Acidobacteriota	FFCH5909	NA	NA	NA	NA	CGTTGTTCGGAATTACTGGGCGTAAAGGGCGCGTAGGCGGCCTCGTAAGTCAGATGTGAAAGCCACAGGCTCAACCTGTGAATGGCATCTGAAACTACCTGGCTTGAGTTCCGGAGGGGAAGGTGGAATTCCCGGTGTAGCGGTGAAATGCGTAGATATCGGGAGGAACACCAGTGGCGAAGGCGGCCTTCTGGACGGATACTGACGCTGATGCG
ASV_39	0	0	1413	755	0	270	0	263	0	0	0	1284	0	1707	0	0	0	0	0	0	0	Archaea	Crenarchaeota	Nitrososphaeria	Nitrososphaerales	Nitrososphaeraceae	Candidatus Nitrososphaera	NA	TGGTCGGGACGATTATTGGGCCTAAAGCATCCGTAGCCTGTCCTGCAAGTCTTCCGTTAAATCCACCTGCTTAACAGATGGGCCGCGGAGGATACTACAGGGCTAGGAGGCGGGAGAGGCAAACGGTACTCAGTGGGTAGGGGTAAAATCCACTGATCCACTGAAGACCACCAGTGGCGAAGGCGGTTTGCTAGAACGCGCTCGACGGTGAGGGA
ASV_40	0	0	0	0	647	0	0	0	1065	183	340	0	94	0	123	917	780	1087	0	0	17	Bacteria	Chloroflexi	Anaerolineae	SBR1031	A4b	NA	NA	CGTTATCCGGAATTACTGGGCGTAAAGGGTGTGCAGGCGGGTCGTTAAGTGGTGCATGAAAGCCCTACGCTCAACGTAGGGAGGCTGTGCCAGACTGGCGGTCTGGAGTGCGCGAGAGGGCTGTGGAATTCCGGGTGTAGTGGTGAAATGCGTAGAGATCCGGAGGAACACCAGAGGCGAAGGCGGCAGCCTGGCGCGCAACTGACGCTGAGACA
ASV_41	0	0	0	1420	0	32	550	234	0	0	0	334	0	2566	0	0	0	0	0	25	9	Bacteria	Proteobacteria	Gammaproteobacteria	Gammaproteobacteria Incertae Sedis	Unknown Family	Acidibacter	NA	CGTTAATCGGAATTACTGGGCGTAAAGCGTGCGTAGACGGTAATGTAAGTCGGGTGTGAAAGCCCCGGGCTCAACCTGGGAATTGCACTCGAGACTGCATTGCTCGGGTGCGGAAGAGGGAAGCGGAATTTCCGGTGTAGCGGTGAAATGCGTAGATATCGGAAGGAACACCAGTGGCGAAAGCGGCTTCCTGGTCCGACACCGACGTTCAGGCA
ASV_42	0	0	509	91	12	815	380	0	681	163	301	47	0	138	395	374	144	68	194	234	598	Bacteria	Acidobacteriota	Acidobacteriae	Bryobacterales	Bryobacteraceae	Bryobacter	NA	CGTTGTTCGGAGTTACTGGGCGTAAAGAGTGCGTAGGCGGTCTGGCAAGTTCGGTGTGAAATCTCCCGGCTTAACCGGGAGGGTGCGCCGAAGACTGTCGGGCTGGAGTGTGGGAGAGGCAGGCGGAATTCCTGGTGTAGCGGTGAAATGCGTAGATATCAGGAGGAACACCGGTGGTGTAGGCGGCCTGCTGGACCATAACTGACGCTGAGGCA
ASV_43	0	0	0	0	25	0	0	0	101	109	2031	0	0	0	309	233	41	1551	0	0	481	Bacteria	Cyanobacteria	Cyanobacteriia	Cyanobacteriales	Nostocaceae	Mastigocladopsis PCC-10914	NA	CGTTATCCGGAATGATTGGGCGTAAAGCGTCCGCAGGTGGCAATGTAAGTCTGCTGTCAAAGCGTCTGGCTCAACCAGATACAGGCAGTGGAAACTACATAGCTAGAGTAAGGTAGGGGTAGAGGGAATTCCTGGTGTAGCGGTGAAATGCGTAGAGATCAGGAAGAACACCGGTGGCGAAGGCGCTCTGCTGGACCTTAACTGACACTGAGGGA
ASV_44	0	0	0	0	325	0	0	0	0	11	0	0	4111	0	0	0	0	0	0	0	0	Bacteria	Chloroflexi	AD3	NA	NA	NA	NA	CGTTATCCGGATTTACTGGGCGTAAAGCGCGTTAAGGCGGCCGGCCAAGTTGAGGGTGAAATCGCAGGGCTCAACCCTGCAACTGCCTTCAATACTGGTCGGCTCGAGTGCGAGAGAGGAGAGTGGAATTCCCGGTGTAGTAGTGAAATGCGTAGATATCGGGAGGAACACCAGTGGCGAAGGCGGCTCTCTGGCTCGCAACTGACGCTGTAGCG
ASV_45	0	0	231	63	22	712	713	0	995	84	308	101	80	292	105	131	64	65	109	265	77	Bacteria	Nitrospirota	Nitrospiria	Nitrospirales	Nitrospiraceae	Nitrospira	NA	CGTTGTTCGGATTTACTGGGCGTAAAGGGAGCGTAGGCGGTTTGGTAAGACCGGTGGGAAAGCCCGGAGCTTAACTCCGGAAGGTCACCGGTGACTGCCAAGCTAGAGGACGGGAGAGGAGCGCGGAATTCCCGGTGTAGCGGTGAAATGCGTAGAGATCGGGAGGAAGGCCGGTGGCGAAGGCGGCGCTCTGGAACGTTCCTGACGCTGAGGCT
ASV_46	0	0	0	0	857	0	0	0	523	365	562	0	167	0	162	440	517	778	0	0	0	Bacteria	Actinobacteriota	Acidimicrobiia	IMCC26256	NA	NA	NA	CGTTGTCCGGATTTATTGGGCGTAAAGAGCTCGTAGGCGGTTCGGTAAGTCGGGTGTGAAATCTCCACGCTCAACGTGGAGGGGCCACTCGATACTGCCGTGACTCGAGTCCGGTAGAGGAGTGTGGAATTCCCGGTGTAGCGGTGAAATGCGCAGATATCGGGAGGAACACCAGTAGCGAAGGCGGCACTCTGGGCCGGAACTGACGCTGAGGA
ASV_47	0	0	3	88	4	92	29	0	344	2128	766	55	84	112	217	11	99	211	0	0	0	Bacteria	GAL15	NA	NA	NA	NA	NA	CGTTGTCCGGATTTACTGGGCGTAAAGCGCGTGCAGGCGGTCGGCTAAGTCCCGTGTTAAAGCCTCCGGCCCAACCGGAGAACGCCGCGGGATACTGGCGGGCTTGAGGATGGTAGAGGGCGATGGAATTCCCGGTGTAGCGGTGAAATGCGTAGATATCGGGAGGAACGCCAGTGGCGAAGGCGGTCGCCTGGGCCATTCCTGACGCTGAGACG
ASV_48	0	0	0	0	3	0	0	0	139	0	3	0	0	0	2355	1520	14	27	0	0	0	Bacteria	Chloroflexi	Ktedonobacteria	Ktedonobacterales	Ktedonobacteraceae	NA	NA	CGTTGTCCGGAGTTATTGGGCGTAAAGCGCTCGCAGGCGGTCAGCCAAGTTCGGAGTGACAGTCCTCAGCTTAACTGAGGAAGGCCTTGGAAAACTGGTTGACTTGAGGGCTTCAGAGGGACACGGAATTCCGGGTGGAGTGGTGAAATGCGTAGAGATCCGGAAGAACACCAAAGGCGTAGGCAGTGTCCTGGGAAGTTCCTGACGCTCAGGAG
ASV_49	0	0	0	0	725	0	0	0	180	431	243	0	151	0	621	910	413	347	0	8	18	Bacteria	Planctomycetota	Planctomycetes	Isosphaerales	Isosphaeraceae	NA	NA	CGTTATTCGGAATCACTGGGCTTAAAGCGCGTGTAGGCGGGTGGGCACGTCGGCCGCTGAAATCCCCCGGCTCAACCGGGGAACGGGCGCCGATACGACCCGCCTGGAGGGACGTAGGGGGACCTGGAACTTCCGGTGGAGCGGTGAAATGCGTTGAGATCGGAAGGAACGCCCGTGGCGAAAGCGAGGTCCTGGACGTCTGCTGACGCTGAGAC
ASV_50	0	0	0	0	0	0	0	0	16	1167	99	0	184	0	0	178	0	0	1168	983	182	Bacteria	Proteobacteria	Alphaproteobacteria	Rhizobiales	Beijerinckiaceae	Methylovirgula	NA	CGTTGTTCGGAATCACTGGGCGTAAAGCGCACGTAGGCGGATCCTTAAGTCAGGGGTGAAATCCCGAGGCTCAACCTCGGAACTGCCTTTGATACTGGGGATCTCGAGTCCGGGAGAGGTGAGTGGAATTGCGAGTGTAGAGGTGAAATTCGTAGATATTCGCAAGAACACCAGTGGCGAAGGCGGCTCACTGGCCCGGTACTGACGCTGAGGTG
ASV_51	0	0	334	266	0	239	127	0	189	283	56	579	4	11	208	36	5	9	820	289	344	Bacteria	Chloroflexi	SHA-26	NA	NA	NA	NA	CGTTGTCCGGATTTACTGGGCGTAAAGAGCGCGTAGGCGGCTCGGCAGGTTGGGTGTGAAAGGCGCGGGCTTAACCCGCGGAGGTCATCCAAGACGGTCGGGCTGAGAGGGCAGTAGAGGAAGGTGGAATTCCGGGTGGAGTGGTGAAATGCGTAGAGATCCGGAGGAACACCGGTGGCGAAGGCGGCCTTCTGGGCTGGCCCTGACGCTGAGGC
ASV_52	0	0	0	0	1010	0	0	0	765	279	1415	0	92	0	22	54	6	0	0	0	0	Bacteria	Planctomycetota	Planctomycetes	Gemmatales	Gemmataceae	NA	NA	CGTTGTTCGGAATCACTGGGCTTAAAGGGCGCGTAGGCGGCCAGCCAAGTCGGGGGTGAAATCTTTCGGCTCAACCGGAAAAGTGCCTTCGATACTGGCTGGCTGGAGGGAGGTAGGGGCATGTGGAACTTCCGGTGGAGCGGTGAAATGCGTTGATATCGGAAGGAACGCCGGTGGCGAAAGCGACGTGCTGGACCTCTTCTGACGCTGAGGCG
ASV_53	0	0	34	126	0	6	32	415	0	0	0	58	0	2962	0	0	0	0	0	0	0	Bacteria	WPS-2	NA	NA	NA	NA	NA	CGTTGTTCGGAATTATTGGGCGTAAAGCGCTCGTAGGCGGGACTGGAAGTCCGTGAAGAAAGACCTGGGCTCAACTCAGGGAACGGCACGGATACTCCAGTTCTTGAGGCAATCAGAGGGTGATGGAATTCCCGGTGTAGCGGTGAAATGCGTAGATATCGGGAGGAACACCAGTGGCGAAGGCGATCACCTGGGGTTGTTCTGACGCTGAGGAG
ASV_54	0	0	0	0	505	0	0	0	408	49	117	0	81	0	0	52	1796	424	0	0	0	Bacteria	Planctomycetota	Planctomycetes	Gemmatales	Gemmataceae	NA	NA	CGTTGTTCGGAATCACTGGGCTTAAAGGGCGCGTAGGCGGTTCTCCCAGTCCGGGGTGAAAGCGCTCGGCTTAACCGGGCCAGTGCCTTGGATACTGGAGAACTCGAGGGAGATAGGGGCAGGTGGAACTTCCGGTGGAGCGGTGAAATGCGTTGATATCGGAAGGAACGCCGGTGGCGAAAGCGGCCTGCTGGATCTCCACTGACGCTGAGGCG
ASV_55	0	0	0	286	0	0	21	1761	0	0	0	0	0	1351	0	0	0	0	0	0	0	Bacteria	Proteobacteria	Gammaproteobacteria	Xanthomonadales	Rhodanobacteraceae	Rhodanobacter	NA	CGTTAATCGGAATTACTGGGCGTAAAGGGTGCGTAGGCGGTTTGTTAAGTCTGTTGTGAAATCCCCGGGCTCAACCTGGGAATGGCAATGGATACTGGCAAGCTAGAGTGTGTCAGAGGATGGTGGAATTTCCGGTGTAGCGGTGAAATGCGTAGAGATCGGAAGGAACATCAGTGGCGAAGGCGGCCATCTGGGACAACACTGACGCTCAAGCA
ASV_56	0	0	19	203	0	1020	156	18	0	0	0	1219	0	772	0	0	0	0	0	0	0	Bacteria	Bacteroidota	Kryptonia	Kryptoniales	BSV26	NA	NA	CGTTGTCCGGAATTACTGGGTGTAAAGGGCGTGTAGGTGGGTCTCTAAGTCGGGGGTGAAATCCTACAGCTTAACTGTAGAATTGCTTCCGATACTGGAGATCTTGAGTGCGGCAGAGGGAGATGGAATTCATGGTGTAGCGGTGAAATGTGTAGATATCATGAAGAACACCAGTAGCGAAGGCGGTCTCCTGGTCCGTAACTGACACTGAGGCG
ASV_57	0	0	0	663	0	5	48	1399	0	0	0	447	0	829	0	0	0	0	0	0	0	Bacteria	Proteobacteria	Gammaproteobacteria	Xanthomonadales	Rhodanobacteraceae	Chujaibacter	NA	CGTTAATCGGAATTACTGGGCGTAAAGCGTGCGCAGGCGGTTTGTTAAGTCCGTTGTGAAAGCCCCGAGCTCAACTTGGGAATTGCAGTGGATACTGGCAGGCTGGAGTACGGTAGAGGAAGGTGGAATTCCCGGTGTAGCAGTGAAATGCGTAGATATCGGGAGGAACACCAGTGGCGAAGGCGGCCTTCTGGACCAGTACTGACGCTCATGCA
ASV_58	0	0	0	18	367	0	896	0	433	515	355	0	4	0	467	291	0	23	0	0	0	Bacteria	Proteobacteria	Gammaproteobacteria	Xanthomonadales	Rhodanobacteraceae	Mizugakiibacter	NA	CGTTAATCGGAATTACTGGGCGTAAAGCGTGCGTAGGTGGTTCGCTAAGTCCGTTGTGAAAGCCCCGAGCTCAACTTGGGAATGGCAGTGGATACTGGCGAGCTGGAGTGCGGTAGAGGAAGGTGGAATTCCCGGTGTAGCGGTGAAATGCGTAGAGATCGGGAGGAACACCAGTGGCGAAGGCGGCCTTCTGGACCAGCACTGACACTCAAGCA
ASV_59	3282	23	0	0	0	0	0	0	0	0	0	0	0	0	0	0	0	0	0	0	0	Bacteria	Chloroflexi	Anaerolineae	NA	NA	NA	NA	TACGTAGGTTGCAAGCGTTATTCGGATTTACTGGGCGTAAAGCGCACCGAGGTGGCTTCTTAAGTTGGATGTAAAATCTCCCGGCTTAACTGGGAGGCGCCATTCAAAACTGAGGAGCTTGAGGTCAGCAGGGGAAAGTGGAATTCCCGGTGTAGTGGTGGAATGCGTAGAGATCGGGAGGAACACCAGTGGCGAAAGCGGCTTTCTGGGCTGCACCTGACACTCTAGTGCGAAAGCGTGGGGAGC
ASV_60	0	0	0	0	1513	0	0	0	260	111	173	0	1048	0	33	19	0	16	0	0	0	Bacteria	Chloroflexi	Ktedonobacteria	Ktedonobacterales	Ktedonobacteraceae	JG30a-KF-32	NA	CGTTGTCCGGATTTATTGGGCGTAAAGGGCACGCAGGCGGTCGTGTAAGTTTGGGGTGACAGCTGTCGGCTTCACCGAGAGAGTGTCCCAAAGACTGCAGGACTTGAGGGCCAACGAGGAACACAGAATTCCGGGTGTAGTGGTGAAATGCGTAGATATCCGGAGGAATACCAACGGCGAAGGCAGTGTTCTGGGTGGTTCCTGACGCTGAGGTG
ASV_61	2996	150	0	0	0	0	0	0	0	0	0	0	0	0	0	0	0	0	0	0	0	Bacteria	Cyanobacteria	Cyanobacteriia	Leptolyngbyales	Leptolyngbyaceae	Leptolyngbya PCC-6306	NA	TACGGAGGATGCAAGCGTTATCCGGAATTATTGGGCGTAAAGCGTCCGTAGGTGGCGATACAAGTCTGTTGTTAAAGCGTGCGGCTCAACCGCATAAGGGCAATGGAAACTGTATGGCTAGAGTGCGATAGGGGTCACAGGAATTCCCAGTGTAGCGGTGAAATGCGTAGATATTGGGAAGAACACCAGCGGCGAAAGCGTGTGACTGGGTCTGCACTGACACTGAGGGACGAAAGCTAGGGGAGC
ASV_62	0	0	0	1432	0	0	0	1043	0	0	0	0	0	599	0	0	0	0	0	0	0	Bacteria	NA	NA	NA	NA	NA	NA	TGTTGTCCGGAGTACTGGGCGTAAAGCGTGTGTAGGCGGTGGTCTGCGTCTGGTGTGAAATCGCCCGGCTTACCTGGGCGGGGGCATCGGAAACGAGACGACTTGAGGGCATGAGAGGCCAGTAGAACTCCCGGTGGACCAGTGAAATGGGTAGAGATCGGGAAGAATACCAGTGGTGCAGACGGCTGGCTGGCGTGTACCTGACGCTGAGACAC
ASV_63	3050	0	0	0	0	0	0	0	0	0	0	0	0	0	0	0	0	0	0	0	0	Bacteria	Deinococcota	Deinococci	Thermales	Thermaceae	Meiothermus	NA	TACGGAGGGTGCGAGCGTTACCCGGATTTACTGGGTGTAAAGGGCGTGTAGGCGGATACTCAAGTCCGGTGCTAAAGACTGGGGCTCAACCCCAGGAGTGCGCTGGATACTGGGTGTCTAGACGGTCGGAGAGGGCAGCGGAATTCTCGGAGTAGCGGTGAAATGCGCAGATACCGAGAGGAACGCCGATAGCGAAAGCAGCTGCCTGGACGATTGGTGACGCTGAGGCGCGAAAGCGTGGGGAGC
ASV_64	0	0	52	182	0	22	175	0	247	30	0	0	0	5	293	992	313	177	36	16	384	Bacteria	Chloroflexi	Ktedonobacteria	Ktedonobacterales	Ktedonobacteraceae	1921-2	NA	CGTTGTCCGGAGTTACTGGGCGTAAAGGGCACGCAGGCGGTCTGCGACGTTTGCCATGACAGGGTCGGGCTTCACTCGACCAGGAGGGCGAAAACGAGCGGACTTGAGGCTTGGAGAGGGACCTGGAATTCCGGGTGGAGTGGTGAAATGCGTAGAGATCCGGAGGAACACCGAAGGCGAAGGCAGGGTCCTGGCCAAGAACTGACGCTGAGGTG
ASV_65	0	0	0	0	561	0	0	0	289	46	144	0	297	0	6	147	768	589	0	0	0	Bacteria	Planctomycetota	Planctomycetes	Gemmatales	Gemmataceae	NA	NA	CGTTGTTCGGAATCACTGGGCTTAAAGGGCGCGTAGGCGGGCTGTCAAGTCAGGGGTGAAATCTTTCGGCTCAACCGGAAAACTGCCTTTGATACTGACGGCCTTGAGGGAGGTAGGGGCATGTGGAACTTCCAGTGGAGCGGTGAAATGCGTTGATATTGGAAGGAACGCCGGTGGCGAAAGCGACGTGCTGGACCTCTTCTGACGCTGAGGCG
ASV_66	0	0	0	0	28	0	0	0	17	1013	839	0	401	0	93	114	147	189	0	0	0	Bacteria	Actinobacteriota	Acidimicrobiia	IMCC26256	NA	NA	NA	CGTTGTCCGGATTCATTGGGCGTAAAGAGCTCGTAGGCGGTTTGGTGAGTCGGGTGTGAAATCTCCACGCTCAACGTGGAGGGGCCACCCGATACTGCCATGACTCGAGTCCGGTAGAGGAGTGTGGAATTCCCGGTGTAGCGGTGAAATGCGCAGATATCGGGAGGAACACCCGTAGCGAAGGCGGCACTCTGGGCCGGTACTGACGCTGAGGA
ASV_67	0	0	22	7	42	0	47	0	525	707	389	47	27	0	322	330	54	98	57	54	87	Bacteria	Chloroflexi	Chloroflexia	NA	NA	NA	NA	CGTTGTCCGGAATCACTGGGCGTAAAGCGCGCGTAGGCGGGCGCCTACATCCACTGTCAAAGCCCCGGGCTCAACCCGGGGAGGCCGGTGGCGATGGGGGGCCTGGAGGATGGCAGAGGCAGGCGGAAGTCCCGAAGGAGCGGTGAAATGCGTAGAGATCGGGAGGAACACCGGAGGCGCAGGCGGCCTGCTGGGCCATGGCTGACGCTGAGGCG
ASV_68	0	0	0	0	287	0	0	20	18	150	356	0	86	10	79	75	650	869	0	11	174	Bacteria	WPS-2	NA	NA	NA	NA	NA	CGTTATTCGGAATTATTGGGCGTAAAGCGCTCGTAGGCGGGACAGGAAGTCCGTGAAGAAAGACCTGGGCTCAACTCAGGGAACGGCACGGATACTCTTGTTCTTGAGGCATTCAGAGGGTGATGGAATTCCCGGTGTAGCGGTGAAATGCGTAGATATCGGGAGGAACACCAGTGGCGAAGGCGATCACCTGGGGATGTTCTGACGCTGAGGAG
ASV_69	0	0	0	0	1627	0	0	0	0	0	114	0	1023	0	0	0	0	0	0	0	0	Bacteria	Planctomycetota	Planctomycetes	Gemmatales	Gemmataceae	NA	NA	CGTTGTTCGGAATCACTGGGCTTAAAGGGCGCGTAGGCGGCTTGCCAAGTCAGGGGTGAAATCTTTCGGCTTAACCGGAAAAGTGCTTCTGATACTGGCGAGCTTGAGGGAGATAGGGGCATGCGGAACTTCCGGTGGAGCGGTGAAATGCGTTGATATCGGAAGGAACGCCGGTGGCGAAAGCGGCGTGCTGGATCTCTTCTGACGCTGAGGCG
ASV_70	0	0	0	0	921	0	0	0	448	163	323	0	183	0	173	181	95	259	0	0	0	Bacteria	Myxococcota	Polyangia	Haliangiales	Haliangiaceae	Haliangium	NA	CGTTGCTCGGAATCATTGGGCGTAAAGCGCACGTAGGCGGTTCGTTAAGTCGGGTGTGAAAGCCCCGGGCTCAACCCGGGAAGGGCACTCGAAACTGGCGAGCTGGAGTACGGAAGAGGGTCTCGGAATTCCCGGTGTAGAGGTGAAATTCGTAGATATCGGGAGGAACACCAGTGGCGAAGGCGGAGACCTGGGCCGATACTGACGCTGAGGTG
ASV_71	2734	0	0	0	0	0	0	0	0	0	0	0	0	0	0	0	0	0	0	0	0	Archaea	Crenarchaeota	Nitrososphaeria	Nitrososphaerales	Nitrososphaeraceae	Candidatus Nitrocosmicus	NA	TACCAGCACCCCGAGTGGTCGGGACGTTTATTGGGCCTAAAGCATCCGTAGCCGGTTCTACAAGTCTTCCGTTAAATCCACCTGCTTAACAGATGGGCTGCGGAAGATACTATAGAGCTAGGAGGCGGGAGAGGCAAGCGGTACTCGATGGGTAGGGGTAAAATCCGTTGATCCATTGAAGACCACCAGTGGCGAAGGCGGCTTGCCAGAACGCGCTCGACGGTGAGGGATGAAAGCTGGGGGAGC
ASV_72	0	0	504	104	0	310	82	0	59	4	0	145	0	101	72	0	0	0	917	201	105	Bacteria	Acidobacteriota	Blastocatellia	Pyrinomonadales	Pyrinomonadaceae	Pyrinomonas	NA	CGTTGTTCGGATTTACTGGGCGTAAAGCGCGCGTAGGCGGCACTGCAAGTCACTTGTGAAATCTCCGGGCTTAACTCGGTAGGGGCCAAGTGATACTGCAGAGCTAGAGTGCGGAAGGGGCAGCTGGAATTCTCGGTGTAGCGGTGAAATGCGTAGATATCGAGAGGAACACCGGTGGCGAAGGCGGGCTGCTGGGCCGACACTGACGCTGAGGC
ASV_73	2601	0	0	0	0	0	0	0	0	0	0	0	0	0	0	0	0	0	0	0	0	Bacteria	Bacteroidota	Kryptonia	Kryptoniales	BSV26	NA	NA	TACGTAGGATCCGAGCGTTGTCCGGAATTACTGGGTGTAAAGGGCGTGTAGGTGGGTCTCTAAGTCGGGGGTGAAATCCTACAGCTTAACTGTAGAATTGCTTCCGATACTGGAGATCTTGAGTGCGGCAGAGGGAGATGGAATTCATGGTGTAGCGGTGAAATGTGTAGATATCATGAAGAACACCAGTAGCGAAGGCGGTCTCCTGGTCCGTAACTGACACTGAGGCGCGAAAGCGTGGGGAGC
ASV_74	2588	0	0	0	0	0	0	0	0	0	0	0	0	0	0	0	0	0	0	0	0	Bacteria	Verrucomicrobiota	Verrucomicrobiae	Chthoniobacterales	Chthoniobacteraceae	Candidatus Udaeobacter	NA	TACAGAGGTCTCAAGCGTTGTTCGGATTCATTGGGCGTAAAGGGTGCGTAGGCGGCGCGGTAAGTCGGGTGTGAAATCTCGGAGCTTAACTCCGAAACTGCATTCGATACTGCCGCGCTCGAGGACTGGAGAGGAGACTGGAATTCACGGTGTAGCGGTGAAATGCGTAGATATCGTGAGGAAGACCAGTGGCGAAGGCGGGTCTCTGGACAGGTCCTGACGCTGAGGCACGAAGGCCAGGGGAGC
ASV_75	0	0	0	0	0	0	233	0	0	0	0	0	0	0	0	0	0	0	0	866	1472	Bacteria	Proteobacteria	Gammaproteobacteria	Burkholderiales	Burkholderiaceae	Burkholderia-Caballeronia-Paraburkholderia	NA	CGTTAATCGGAATTACTGGGCGTAAAGCGTGCGCAGGCGGTTCGCTAAGACAGATGTGAAATCCCCGGGCTTAACCTGGGAACTGCATTTGTGACTGGCGGGCTAGAGTATGGCAGAGGGGGGTAGAATTCCACGTGTAGCAGTGAAATGCGTAGAGATGTGGAGGAATACCGATGGCGAAGGCAGCCCCCTGGGCCAATACTGACGCTCATGCA
ASV_76	0	0	0	0	15	0	0	0	473	126	63	0	0	0	252	1019	225	39	37	112	111	Bacteria	Planctomycetota	Planctomycetes	Gemmatales	Gemmataceae	NA	NA	CGTTGTTCGGAATCACTGGGCTTAAAGGGCGCGTAGGCGGTCTCCCAAGTCTGGGGTGAAATCGTTCGGCTCAACCGGACCAGGGCCTTGGATACTGGGAGACTCGAGGGAGGTAGGGGCAGGTGGAACTTCCGGTGGAGCGGTGAAATGCGTTGATATCGGAAGGAACGCCGGTGGCGAAAGCGGCCTGCTGGACCTCATTCTGACGCTGAGGC
ASV_77	0	0	0	0	336	0	0	0	597	194	249	0	538	0	3	82	296	115	0	0	4	Bacteria	Acidobacteriota	Holophagae	Subgroup 7	NA	NA	NA	CGTTACTCGGAATTATTGGGCGTAAAGGGCGCGTAGGCGGTCGTGTGCGTCAGGGGTGAAATCCCCAGGCTTAACCTGGGACGTGCCTCTGATACGGCATGGCTTGAGTCCGGGAGAGGGGAGCAGAATTCCCAGTGTAGCGGTGAAATGCGTAGATATTGGGAGGAATACCGGTGGCGAAGGCGGCTCCCTGGACCGGTTCTGACGCTGAGGCG
ASV_78	0	0	7	16	24	0	5	0	21	1753	144	24	43	0	284	6	0	0	71	8	0	Bacteria	Chloroflexi	NA	NA	NA	NA	NA	CGTTATCCGGATTTACTGGGCGTAAAGCGCGCTAAGGCGGCCGGCTAAGTTGGGGGTGAAATCTCGGGGCTCAACCCCGGAACTGCCTCCAATACTGGTCGGCTCGAGTTCGGGAGAGGAAGGTGGAATTCCCGGTGTAGTAGTGAAATGCGTAGATATCGGGAGGAACACCAGTGGCGAAGGCGGCCTTCTGGCCCGCAACTGACGCTGTAGCG
ASV_79	0	0	213	0	0	0	217	0	0	0	0	0	0	1968	0	0	0	0	0	0	0	Bacteria	Actinobacteriota	Actinobacteria	Frankiales	Frankiaceae	Jatrophihabitans	NA	CGTTGTCCGGAATTATTGGGCGTAAAGAGCTCGTAGGCGGCTTGTCGCGTCGGCTGTGAAAACCTGGGGCTCAACCCCGGGCCTGCAGCCGATACGGGCAAGCTAGAATTCGGTAGGGGAGACTGGAATTCCTGGTGTAGCGGTGAAATGCGCAGATATCAGGAGGAACACCGGTGGCGAAGGCGGGTCTCTGGGCCGATATTGACGCTGAGGAG
ASV_80	0	0	0	0	0	0	0	0	0	0	0	0	83	0	52	37	1465	750	0	4	0	Bacteria	Acidobacteriota	Holophagae	Subgroup 7	NA	NA	NA	CGTTATTCGGAATTATTGGGCGTAAAGGGCGCGTAGGCGGCCATGCGTGTCTTCCGTGAAATCCCTCGGCTTAACTGAGGACGTGCGGAAGAAACTGCAAGGCTTGAGTCCGGGAGAGGGGGGTGGAATTCCCAGTGTAGCGGTGAAATGCGTAGATATTGGGAGGAACACCGGTGGCGAAGGCGGCCCCCTGGACCGGTACTGACGCTGAGGCG
ASV_81	0	0	0	0	0	0	0	0	0	873	0	0	563	0	0	0	863	0	0	0	87	Bacteria	Chloroflexi	Ktedonobacteria	Ktedonobacterales	Ktedonobacteraceae	NA	NA	CGTTGTCCGGATTTATTGGGCGTAAAGGGCACGCAGGCGGTCTGCCGCATTCGCGGTGACAGTTTTCGGCTTCCCTGAGAAAGGGTCGCGACGATGGGCAGACTTGAGGACCAGAGAGGAAACGGGAACTCCGGGTGGAGTGGTGAAATGCGTAGATATCCGGAAGAACACCCATGGCGAAGGCACGTTTCTGGCTGGTTACTGACGCTCAGGTG
ASV_82	0	0	0	0	528	0	0	0	226	68	178	0	132	0	0	15	587	644	0	0	0	Bacteria	Acidobacteriota	Acidobacteriae	Bryobacterales	Bryobacteraceae	Bryobacter	NA	CGTTGTTCGGAGTTACTGGGCGTAAAGAGTGCGTAGGCGGTTTCGTAAGTTTGGTGTGAAATCTCCCGGCTTAACTGGGAGGGTGCGCCGAAAACTGCGGGGCTGGAGTGTGGGAGAGGTAAGCGGAATTCCCGGTGTAGCGGTGAAATGCGTAGATATCGGGAGGAACACCAGCGGTGTAGACGGCTTACTGGACCATGACTGACGCTGAGGCA
ASV_83	0	0	0	0	0	0	0	0	0	159	0	0	299	0	104	524	868	410	0	0	5	Bacteria	Planctomycetota	Planctomycetes	Gemmatales	Gemmataceae	NA	NA	CGTTGTTCGGATTCACTGGGCTTAAAGGGCGCGTAGGCGGGTGGACAAGTCAGGGGTGAAATCTTTCGGCTTAACCGGAAAAGTGCCTTTGATACTGTCTGTCTCGAGGGAGGTAGGGGTGCGTGGAACTTCTGGTGGAGCGGTGAAATGCGTAGATATCAGAAGGAACGCCGGTGGCGAAAGCGACGCACTGGATCTCTACTGACGCTGAGGCG
ASV_84	0	0	0	0	364	0	0	0	242	58	244	0	20	0	95	263	273	800	0	0	6	Bacteria	NA	NA	NA	NA	NA	NA	TGTTGTCCGGAGTACTGGGCGTAAAGCGTGTGTAGGCGGTGCGCTGCGTCTGTGGTGAAATCTCCCGGCTTACCTGGGAGGGGGCCGCAGATACGAGCGGACTTGAGGGCGTGAGAGGCGAGTAGAACTCCCGGTGGACCAGTGAAATGGGTAGAGATCGGGAAGAATACCAGTGGTGCAGACGGCTCGCTGGCGCGTACCTGACGCTGAGACAC
ASV_85	0	0	79	354	33	32	467	0	201	100	108	295	0	157	62	159	34	96	102	13	38	Bacteria	Planctomycetota	Planctomycetes	Gemmatales	Gemmataceae	NA	NA	CGTTGTTCGGATTCACTGGGCTTAAAGGGCGCGTAGGCGGGTCATCAAGTCGGGGGTGAAATCTTTCCGCTCAACGGGAAAAGTGCCTCCGATACTGACGATCTCGAGGGAGGTAGGGGCATGCGGAACTTCCGGTGGAGCGGTGAAATGCGTAGATATCGGAAGGAACGCCGGTGGCGAAAGCGGCGTGCTGGACCTCTGCTGACGCTGAGGCG
ASV_86	0	0	148	499	0	41	580	422	0	89	11	120	0	385	0	0	0	0	0	0	10	Bacteria	Actinobacteriota	Acidimicrobiia	IMCC26256	NA	NA	NA	CGTTGTCCGGATTCATTGGGCGTAAAGAGCTCGTAGGCGGCTTGATAAGTCGGATGTGAAACCTCCAGGCTCAACCTGGAGTCGCCATCCGATACTGTCATGGCTAGAGTCCGGTAGGGGCCCACGGAACTCCTGGTGTAGCGGTGAAATGCGCAGATATCAGGAAGAACACCGGTGGCGAAGGCGGTGGGCTGGGCCGGCACTGACGCTGAGGA
ASV_87	0	0	0	0	1152	0	0	0	89	77	147	0	720	0	19	13	7	4	0	23	19	Bacteria	Chloroflexi	Ktedonobacteria	Ktedonobacterales	Ktedonobacteraceae	G12-WMSP1	NA	CGTTGTCCGGAGTTACTGGGCGTAAAGGGCACGCAGGCGGTCGTTGGCGTCGCTGGTGACAGCTCCCGGCTCAACTGGGAGAGTGGCGGCGAAACGGGACGACTTGAGGGCCAGAGAGGGACAGGGAACTCCGGGTGGAGTGGTGAAATGCGTAGATATCCGGAAGAACACCAAAGGCGAAGGCACTGTCCTGGATGGTTACTGACGCTAAGGTG
ASV_88	0	0	283	367	0	100	324	39	25	0	32	760	0	169	0	14	5	0	43	22	25	Bacteria	Actinobacteriota	Acidimicrobiia	NA	NA	NA	NA	CGTTGTCCGGATTTATTGGGCGTAAAGAGCTCGTAGGCGGCTTGGTAAGTTAGATGTGAAATCTCCAGGCTCAACTTGGAGTCGCCATTTAATACTGCCATGGCTAGAGTCCGGTAGAGGGTCACGGAATTCCTGGTGTAGCGGTGGAATGCGCAGATATCAGGAGGAACACCGACTGCGAAGGCGGTGACCTGGGCCGGTACTGACGCTGAGGA
ASV_89	0	0	308	373	0	259	219	0	24	299	0	639	0	57	0	0	0	0	11	0	16	Bacteria	Chloroflexi	Ktedonobacteria	Ktedonobacterales	Ktedonobacteraceae	FCPS473	NA	CGTTCTCCGGATTTACTGGGCGTAAAGCGTCCGCAGGCGGTTCAGCAAGTCTCTGCTGACAGTCCTCAGCTTAACTGAGGAAGGCGTAGGGAAACTACTGGACTTGAGACATCGAGAGGCAGAGGGAATTCCGTGTGGAGCAGTGAAATGCGTAGAGATGCGGAAGAACACCAGAGGCGAAGGCGCTCTGCTGGCGATGCTCTGACGCTCATGGA
ASV_90	0	0	0	0	151	0	0	0	348	245	121	0	87	0	34	219	291	652	0	0	6	Bacteria	Acidobacteriota	Acidobacteriae	Solibacterales	Solibacteraceae	Candidatus Solibacter	NA	CGTTGTTCGGAGTTACTGGGCGTAAAGGGTGTGTAGGCGGTTCTCTAAGTTTGGTGTGAAATCTCCCGGCTCAACCGGGAGGGTGCGCCGAAAACTGGAGAGCTAGAGTGCGGGAGGGGAGAGTGGAATTCCTGGTGTAGCGGTGAAATGCGTAGATATCAGGAGGAACACCGGTGGTGTAGACGGCTCTCTGGACCGTAACTGACGCTGAGACA
ASV_91	0	0	0	634	0	18	0	1410	0	0	0	71	0	0	0	0	0	0	0	0	0	Bacteria	Actinobacteriota	Actinobacteria	Frankiales	Frankiaceae	Jatrophihabitans	NA	CGTTGTCCGGAATTATTGGGCGTAAAGAGCTCGTAGGCGCTTGTCGCGTCGGCTGTGAAAACCTGGGGCTCAACCCCGGGCCTGCAGCCGATACGGGCAAGCTAGAATTCGGTAGGGGAGACTGGAATTCCTGGTGTAGCGGTGAAATGCGCAGATATCAGGAGGAACACCGGTGGCGAAGGCGGGTCTCTGGGCCGATATTGACGCTGAGGAGC
ASV_93	8	2111	0	0	0	0	0	0	0	0	0	0	0	0	0	0	0	0	0	0	0	Bacteria	Acidobacteriota	Acidobacteriae	Subgroup 2	NA	NA	NA	GACGTAGGGGGCCAGCGTTGTTCGGAATTACTGGGTGTAAAGGGTTCGTAGGCGGTGTAGCAAGTCGGGAGTGAAATCTATGGGCTTAACCCATAGGCTGCTTCCGAAACTGCTGTGCTTGAGTGTGGGAGAGGCGCGTGGAATTGCAGGTGTAGCGGTGAAATGCGTAGATATCTGCAGGAACACCCGTGGCGAAAGCGGCGCGCTGGACCACTACTGACGCTGAGTGAACGAAAGCTAGGGGAG
ASV_94	0	0	233	0	0	153	11	0	0	35	0	0	0	26	356	247	19	6	0	237	793	Bacteria	Acidobacteriota	Blastocatellia	2024-11-01	NA	NA	NA	GCGTTGTTCGGAATTACTGGGCGTAAAGGGCGCGTAGGCGGCTCTTCAAGTCGGGCGTGAAATCTCCGGGCTTAACCCGGAAGGGTCGTTCGATACTGTCGGGCTGGAGTGCGGAAGAGGCCACCGGAATTCCGTGTGTAGCGGTGAAATGCGTAGATATACGGAGGAACACCTGCGGCGAAGGCGGGTGGCTGGGCCGACACTGACGCTGAGGC
ASV_95	0	0	0	0	277	0	0	0	55	8	109	0	221	0	16	74	533	750	0	0	0	Bacteria	Proteobacteria	Alphaproteobacteria	Rhizobiales	Hyphomicrobiaceae	Pedomicrobium	NA	CGTTGTTCGGAATCACTGGGCGTAAAGCGCACGTAGGCGGATGTGTCAGTCAGGGGTGAAATCCCGGAGCTCAACTTCGGAACTGCCTTTGATACAGCACGTCTTGAGTCCGATAGAGGTGGGTGGAATTCCTAGTGTAGAGGTGAAATTCGTAGATATTAGGAAGAACACCGGTGGCGAAGGCGGCCCACTGGATCGGTACTGACGCTGAGGTG
ASV_96	0	0	0	643	0	0	4	451	0	0	0	0	0	879	0	0	0	0	0	0	0	Bacteria	Planctomycetota	Planctomycetes	Gemmatales	Gemmataceae	NA	NA	CGTTGTTCGGATTCACTGGGCTTAAAGGGCGCGTAGGCGGACGGTCAAGTCAGGGGTGAAATCTTTCAGCTCAACTGGAAAAGTGCCTTTGATACTGATCGTCTCGAGGGAGGTAGGGGCATGTGGAACTTCCGGTGGAGCGGTGAAATGCGTAGATATCGGAAGGAACGCCGGTGGCGAAAGCGACGTGCTGGACCTCTTCTGACGCTGAGGCG
ASV_97	0	0	0	0	32	0	0	0	1264	245	285	0	6	0	6	33	6	39	0	16	10	Bacteria	Chloroflexi	Ktedonobacteria	Ktedonobacterales	Ktedonobacteraceae	FCPS473	NA	CGTTGTCCGGAATTATTGGGCGTAAAGCGCGTGCAGGCGGTTCAACAAGTTCAGGGTGACAGTCACCGGCCTAACCGGTGAAGTGTTCTGAAAACTATTGGACTTGAGAGCGAGAGAGGGACCTGGAACTCCGGGTGGAGCGGTGAAATGCGTAGAGATCCGGAAGAACACCAAAGGCGAAGGCAGGGTCCTGGCTCGTTTCTGACGCTGAGGCG
ASV_98	0	0	0	0	100	0	0	0	30	109	521	0	14	0	220	254	360	179	0	15	112	Bacteria	Cyanobacteria	Cyanobacteriia	Leptolyngbyales	Leptolyngbyaceae	Leptolyngbya PCC-6306	NA	CGTTATCCGGAATTATTGGGCGTAAAGCGTCCGTAGGTGGCGAATCAAGTCTGTTGTCAAAGCGTGCGGCTCAACCGCATACGGGCAATGGAAACTGGTTAGCTAGAGTGCGATAGGGGTCACAGGAATTCCCAGTGTAGCGGTGAAATGCGTAGATATTGGGAAGAACACCAGCGGCGAAAGCGTGTGACTGGGTCTGCACTGACACTGAGGGA
ASV_99	0	0	0	0	83	0	2	0	372	200	111	0	44	0	198	252	278	359	0	0	0	Bacteria	Chloroflexi	Ktedonobacteria	Ktedonobacterales	Ktedonobacteraceae	1921-2	NA	CGTTGTCCGGAGTACTGGGCGTAAAGCGTCCGCAGGCGGTTCTGCGCGTTTCCGGTGCCAGCCCGTTGCTTAACGGCGGGAGTGCCGGGAAGACGGCAGGACTCGAGGGCCTCAGAGGGACATAGAATTCCGGGTGGAGTGGTGAAATGCGTAGAGATCCGGAGGAATACCAATGGCGCAGGCAGTGTCCTGGGAGGCCACTGACGCTGAGGGAC
ASV_100	0	0	0	0	67	0	0	0	242	323	535	0	589	0	19	53	0	0	19	15	28	Bacteria	Actinobacteriota	Thermoleophilia	Gaiellales	NA	NA	NA	CGTTGTCCGGATTTATTGGGCGTAAAGAGCGTGTAGGCGGCCAGGTAGGTCCGTTGTGAAAACTCGAGGCTCAACCTCGAGACGTCGGCGGAAACCCTCTGGCTAGAGTCCGGAAGAGGAGAGTGGAATTCCTGGTGTAGCGGTGAAATGCGCAGATATCAGGAAGAACACCCGTGGCGAAGGCGGCTCTCTGGGACGGTACTGACGCTGAGACG
ASV_101	24	1850	0	0	0	0	0	0	0	0	0	0	0	0	0	0	0	0	0	0	0	Bacteria	Firmicutes	NA	NA	NA	NA	NA	TACGTAGGGGGCAAGCGTTACCCGGATTTACTGGGCGTAAAGCGCGTGTAGGTGGTTGGTTAAGCGTGATGTGAAAGCTTCCGGCTCAACCGGAAAACTGCATTGCGAACTGGCTGACTTGAGGACAGGAGAGGGAAGCGGAATTCCCGGTGTAGCGGTGAAATGCGTAGATATCGGGAGGAACACCAGAGGCGAAGGCGGCTTCCTGGCCTGAACCTGACACTGAGACGCGAAAGCGTGGGGAGC
ASV_102	0	0	112	129	31	22	234	49	406	62	66	47	0	168	173	232	31	71	27	7	0	Bacteria	NA	NA	NA	NA	NA	NA	TGTTGTCCGGAGTACTGGGCGTAAAGCGTGTGTAGGCGGTGGTGTTTGTCTGGTGTGAAATCTCCCGGCTTACCTGGGAGGGGGCATCGGAAACGGCAGCACTTGAGGGCATCAGAGGCCAGTAGAACTCCCGGTGGACCAGTGAAATGGGTAGAGATCGGGAAGAATACCAGTGGTGCAGACGGCTGGCTGGGGTGTACCTGACGCTGAGACAC
ASV_103	0	0	0	0	0	0	0	0	0	0	0	0	0	0	1479	0	7	11	277	68	15	Bacteria	NA	NA	NA	NA	NA	NA	CGTTACCCGGATTCACTGGGCGTAAAGCGCGTGTAGGCGGCTGGCCAAGTCCGGTGTGAAAGCCCCTGGCTCAACCGGGGAAGTGCGCCGGATACTGGTCTGGCTAGAGGGCAGGAGAGGGTGGCGGAATTGCCGGTGTAGCGGTGAAATGCGTAGATATCGGCAGGAACACCGGAGGCGAAGGCGGCCACCTGGCCTGTACCTGACGCTGAGAC
ASV_104	0	0	28	102	0	0	0	149	0	0	0	46	0	1501	0	0	0	0	0	0	0	Bacteria	Firmicutes	YNPFFP2	NA	NA	NA	NA	CGTTGTCCGGAATGACTGGGCGTAAAGGGCGCGTAGGCGGCCCGTTAAGTCGGGTGTGAAAGGGGAAGGCTCAACCTTCCGACGGCACTCGAAACTGGCGGGCTCGAGGTGAGTAGAGGAGAGCGGAATTCCCGGTGTAGCGGTGAAATGCGTAGATATCGGGAGGAACACCAGTGGCGAAGGCGGCTCTCTGGGCTTGACCTGACGCTGAGGCG
ASV_105	0	0	30	30	0	746	209	0	26	51	21	554	0	66	0	0	0	0	83	0	5	Bacteria	Actinobacteriota	Thermoleophilia	Gaiellales	NA	NA	NA	CGTTGTCCGGATTCATTGGGCGTAAAGCGCGTGTAGGCGGCCAGGTAGGTCCGCTGTGAAAACTCGAGGCTCAACCTCGAGACGTCGGCGGAAACCACTTGGCTAGAGTCCGGAAGAGGAGAGTGGAATTCCCGGTGTAGCGGTGAAATGCGCAGATATCGGGAAGAACACCCGTGGCGAAGGCGGCTCTCTGGGACGGTACTGACGCTGAGACG
ASV_106	0	0	0	0	185	0	0	0	175	480	794	0	18	0	0	6	59	10	0	0	11	Bacteria	Acidobacteriota	Acidobacteriae	Acidobacteriales	Acidobacteriaceae (Subgroup 1)	Granulicella	NA	CGTTGTTCGGAATTATTGGGCGTAAAGGGTGCGTAGGCGGTTTGGCAAGTCTTATGTGAAATCTTCGGGCTCAACCCGAAGCCTGCATGAGAAACTGCCGGGCTTGAGTATGGGAGAGGTGAGTGGAATTTCCGGTGTAGCGGTGAAATGCGTAGATATCGGAAGGAACACCTGTGGCGAAAGCGGCTCACTGGACCATAACTGACGCTGATGCA
ASV_107	0	0	0	0	260	0	0	0	442	111	248	0	27	0	40	107	0	118	63	220	91	Archaea	Crenarchaeota	Nitrososphaeria	Nitrososphaerales	Nitrososphaeraceae	Candidatus Nitrososphaera	NA	TGGTCGGGACGATTATTGGGCCTAAAGCATCCGTAGCTGGTTCTGCAAGTCTTCCGTTAAATCCACCTGCTCAACAGATGGGCTGCGGAGGATACTACAGGGCTAGGAGGCGGGAGAGGCAAGCGGTACTCAGTGGGTAGGGGTAAAATCCTCTGATCCACTGAAGACCACCAGTGGCGAAGGCGGCTTGCCAGAACGCGCTCGACGGTGAGGGA
ASV_108	0	0	979	174	0	362	55	0	0	0	0	146	0	0	0	0	0	0	0	0	0	Archaea	Crenarchaeota	Nitrososphaeria	Nitrososphaerales	Nitrososphaeraceae	Candidatus Nitrososphaera	NA	TGGTCGGGACGATTATTGGGCCTAAAGCATCCGTAGCCGGTTCTGCAAGTCTTCCGTTAAATCCACCTGCTCAACAGATGGGCTGCGGGGGATACTACAGGGCTAGGAGGCGGGAGAGGCAAGCGGTACTCAGTGGGTAGGGGTAAAATCCTCTGATCCACTGAAGACCACCGGTGGCGAAGGCGGCTTGCCAGAACGCGCTCGACGGTGAGGGA
ASV_109	0	0	0	99	23	0	24	1274	0	0	0	0	0	292	0	0	0	0	0	0	0	Bacteria	Proteobacteria	Gammaproteobacteria	Burkholderiales	Comamonadaceae	Piscinibacter	NA	CGTTAATCGGAATTACTGGGCGTAAAGCGTGCGCAGGCGGCTTTGCAAGACAGATGTGAAATCCCCGGGCTCAACCTGGGAACTGCATTTGTGACTGCATGGCTAGAGTGCGGCAGAGGGGGATGGAATTCCGCGTGTAGCAGTGAAATGCGTAGATATGCGGAGGAACACCGATGGCGAAGGCAATCCCCTGGGCCTGCACTGACGCTCATGCA
ASV_110	0	0	0	0	48	0	0	0	819	104	283	0	0	0	55	146	149	72	5	12	0	Bacteria	Planctomycetota	Planctomycetes	Gemmatales	Gemmataceae	NA	NA	CGTTGTTCGGAATCACTGGGCTTAAAGGGCGCGTAGGCGGTCGACCAAGTCCGGGGTGAAATCTTTCGGCTTAACCGGAAAAGTGCCTTGGATACTGGCCGGCTGGAGGGAGGTAGGGGCAGGTGGAACTTCCAGTGGAGCGGTGAAATGCGTTGATATTGGAAGGAACGCCGGTGGCGAAAGCGACCTGCTGGACCTCTTCTGACGCTGAGGCG
ASV_111	0	0	0	13	0	76	41	0	29	487	78	36	122	49	401	43	98	65	98	25	24	Bacteria	Gemmatimonadota	Gemmatimonadetes	Gemmatimonadales	Gemmatimonadaceae	NA	NA	CGTTGTCCGGAATCACTGGGCGTAAAGGGCGCGTAGGCGGCCTGATAAGTAGGGGGTGAAATCCCGTGGCTCAACCGCGGGGCTGCCTTCTAGACTGTCGGGCTAGAGCACGGTAGAGGCGGATGGAATTCCCGGTGTAGCGGTGGAATGCGTAGAGATCGGGAAGAACACCGGTGGCGAAGGCGGTCCGCTGGGCCGTTGCTGACGCTGAGGCG
ASV_112	0	0	0	0	95	0	0	0	163	0	110	0	12	0	25	112	400	648	9	10	98	Bacteria	Acidobacteriota	Acidobacteriae	Subgroup 2	NA	NA	NA	CGTTGTTCGGAATTACTGGGTGTAAAGGGTTCGTAGGCGGTGCGGCAAGTTGGGAGTGAAATCTCTGGGCTTAACCCAGAGGCTGCTTCCAAAACTGCTGTGCTTGAGTGTGGGAGAGGCGCGTGGAATTGCAGGTGTAGCGGTGAAATGCGTAGATATCTGCAGGAACACCCGTGGCGAAAGCGGCGCGCTGGACCACAACTGACGCTGAGGAA
ASV_113	0	0	0	0	0	0	0	0	1086	162	0	0	0	0	0	284	0	42	0	0	78	Bacteria	Chloroflexi	Ktedonobacteria	Ktedonobacterales	Ktedonobacteraceae	1921-2	NA	CGTTGTCCGGAGTTACTGGGCGTAAAGGGCACGCAGGCGGTCTGCCACGTTGCCATGACAGGGTCGGGCTTCACTCGACCAGGAGGGCAAAAACGAGCGGACTTGAGGCTTGGAGAGGGACCTGGAATTCCGGGTGGAGTGGTGAAATGCGTAGAGATCCGGAGGAACACCGAAGGCGAAGGCAGGGTCCTGGCCAAGAACTGACGCTGAGGTGC
ASV_114	0	0	0	21	0	0	0	1264	0	0	0	0	0	347	0	0	0	0	0	0	0	Bacteria	Bacteroidota	Bacteroidia	Chitinophagales	Chitinophagaceae	Ferruginibacter	NA	CGTTATCCGGATTTACTGGGTTTAAAGGGTGCGTAGGTGGATTTGTAAGTCAGTGGTGAAATCTCCGAGCTTAACTCGGAAACTGCCATTGATACTATAGATCTTGAATCATCTGGAGGTAAGCGGAATATGTCATGTAGCGGTGAAATGCTTAGATATGACATAGAACACCAATTGCGAAGGCAGCTTACTACGGATGTATTGACACTGAGGCA
ASV_115	0	0	0	0	191	0	0	0	151	232	879	0	0	0	11	25	0	87	0	0	6	Bacteria	Proteobacteria	Alphaproteobacteria	Sphingomonadales	Sphingomonadaceae	NA	NA	CGTTGTTCGGAATTACTGGGCGTAAAGCGCACGTAGGCGGCTATTCAAGTCAGAGGTGAAAGCCCGGGGCTCAACTCCGGAACTGCCTTTGAAACTAGGTAGCTTGAACATTGGAGAGGCGAGTGGAATTCCGAGTGTAGAGGTGAAATTCGTAGATATTCGGAAGAACACCAGTGGCGAAGGCGACTCGCTGGACAATTGTTGACGCTGAGGTG
ASV_116	0	0	0	106	0	0	171	1180	0	0	0	0	0	121	0	0	0	0	0	0	0	Bacteria	Armatimonadota	Armatimonadia	Armatimonadales	NA	NA	NA	CGTTGTCCGAAGTTACTGGGCGTAAAGAGCGCGTAGGCGGGTTTTTAAGTGAGGGGTGAAATTCCGAGGCTCAACCTCGGAACTGCCTTTCATACTGGGAACCTTGAGTGCGGGAGAGGCGAGTGGAATGGTCGGTGTAGCGGTGAAATGCGTAGATATCGATCGGAACACCCATGGCGAAGGCAGCTCGCTGGCCTGTAACTGACGCTGAGGCG
ASV_117	0	0	0	0	66	0	0	0	58	11	0	0	16	0	0	0	397	1014	0	0	0	Bacteria	Actinobacteriota	Acidimicrobiia	IMCC26256	NA	NA	NA	CGTTGTCCGGATTTATTGGGCGTAAAGAGCTCGTAGGCGGTTTGGTAAGTCGGATGTGAAATCTCCACGCTCAACGTGGAGGCGCCATTCGAAACTGCCATGACTCGAGTCCGGTAGGGGAGTGTGGAATTTCCGGTGTAGCGGTGAAATGCGCAGAGATCGGAAGGAACACCCGTAGCGAAGGCGGCACTCTGGGCCGGTACTGACGCTGAGGA
ASV_118	0	0	25	0	0	31	0	0	0	0	0	0	0	0	43	29	0	0	0	144	1286	Bacteria	Proteobacteria	Alphaproteobacteria	Rhizobiales	Xanthobacteraceae	Pseudolabrys	taiwanensis	CGTTGCTCGGAATTACTGGGCGTAAAGCGCACGTAGGCGGTTTCTTAAGTCGGGGGTGAAATCCTGGAGCTCAACTCCAGAACTGCCTTCGATACTGGGAAACTTGAGTTCGGGAGAGGTGAGTGGAACTGCGAGTGTAGAGGTGAAATTCGTAGATATTCGCAAGAACACCAGTGGCGAAGGCGGCTCACTGGCCCGATACTGACGCTGAGGTG
ASV_119	0	0	7	87	0	0	0	586	0	0	0	23	0	829	0	0	0	0	0	0	0	Archaea	Crenarchaeota	Nitrososphaeria	Nitrosotaleales	Nitrosotaleaceae	NA	NA	TGGTCAGGGCGTTTATTGGGCCTAAAGCATCCGTAGCCGGCTCAGTAGGTCTCCTGTTAAATCCAACGGCTTAACTGTTGGCCTGCAGGAGATACCAGTGGGCTAGGAGGCGGGAGAGGCGGACGGTACTCCGAGGGTAGGGGTAAAATCCTTTGATCCCCGGAAGACCACCAGTGGCGAAGGCGGTCCGCCAGAACGCGCTCGACGGTGAGGGA
ASV_120	0	0	0	0	93	0	0	0	10	363	149	0	162	0	22	97	372	259	0	0	0	Bacteria	Planctomycetota	Planctomycetes	Gemmatales	Gemmataceae	NA	NA	CGTTGTTCGGATTCACTGGGCTTGAAGGGCGCGTAGGCGGCTTGCCAAGTCGGGGGTGAAATCTTTCGGCTCAACCGGAAAAGTGCTTCCGATACTGGCAGGCTCGAGTGGGGTAGGGGCGGACGGAACTTCCGGTGGAGCGGTGAAATGCGTAGATATCGGAAGGAACGCCGGTGGCGAAAGCGGTCCGCTGGACCCCTCCTGACGCTGAGGCG
ASV_121	0	0	0	0	302	0	0	0	104	42	177	0	28	0	28	172	293	345	0	0	0	Bacteria	Proteobacteria	Alphaproteobacteria	Rhizobiales	Xanthobacteraceae	NA	NA	CGTTGCTCGGAATCACTGGGCGTAAAGCGCACGTAGGCGGACTCTTAAGTCGGGGGTGAAATCCTGGAGCTCAACTCCAGAACTGCCTTCGATACTGGGAGTCTTGAGTTCGGGAGAGGTGAGTGGAACTGCGAGTGTAGAGGTGAAATTCGTAGATATTCGCAAGAACACCAGTGGCGAAGGCGGCTCACTGGCCCGATACTGACGCTGAGGTG
ASV_122	0	0	763	13	0	399	16	8	0	0	0	42	0	121	0	0	0	0	0	0	112	Bacteria	Acidobacteriota	Blastocatellia	Blastocatellales	Blastocatellaceae	NA	NA	CGTTGTTCGGATTTACTGGGCGTAAAGGGCGCGTAGGCGGCGCGGTAAGTCACTTGTGAAATCTCTGAGCTTAACTCAGAACGGCCAAGTGATACTGCTGTGCTAGAGTGCGGAAGAGGCAACCGGAATTCTTGGTGTAGCGGTGAAATGCGTAGATATCAAGAGGAACACCTGAGGCGAAGGCGGGTTGCTGGGCCGACACTGACGCTGATGCG
ASV_123	1472	0	0	0	0	0	0	0	0	0	0	0	0	0	0	0	0	0	0	0	0	Bacteria	Cyanobacteria	Cyanobacteriia	Cyanobacteriales	Nostocaceae	Fischerella PCC-9339	NA	TACGGAGGATGCAAGCGTTATCCGGAATGATTGGGCGTAAAGCGTCCGCAGGTGGTTGTGTGTGTCTATTGTCAAAGGGTCATGCTTAACATGATAAAGGCAGTGGAAACTACACGACTAGAGTGCGTTCGGGGCAGAGGGAATTCCTGGTGTAGCGGTGAAATGCGTAGAGATCAGGAAGAACACCGGTGGCGAAAGCGCTCTGCTAGGCCGCAACTGACACTGAGGGACGAAAGCTAGGGGAGC
ASV_124	0	0	21	4	0	57	68	0	50	44	47	19	0	13	380	6	0	0	400	313	41	Bacteria	NA	NA	NA	NA	NA	NA	CGTTGTCCGGAGTACTGGGCGTAAAGCGCGCGCAGGCGGTGCGGTAAGTTCGCGGTGAAAGCCCCTGGCTCACCTGGGGGAGGTCCGCGGAGACTGCCGCACTGGAGGGGGGCAGAGGCCGGTGGAATTCCCGGTGTAGTGGTGAAATACGTAGAGATCGGGAGGAACACCCGTGGCGAAGGCGGCCGGCTGGGCCCTACCTGACGCTGAGGCGC
ASV_125	0	0	0	12	194	0	29	0	43	199	693	0	15	0	10	10	37	188	0	0	0	Bacteria	Proteobacteria	Alphaproteobacteria	Sphingomonadales	Sphingomonadaceae	Novosphingobium	NA	CGTTGTTCGGAATTACTGGGCGTAAAGCGCACGTAGGCGGCTATTCAAGTCAGAGGTGAAAGCCCGGGGCTCAACCCCGGAACTGCCTTTGAAACTAGATAGCTAGAATCTTGGAGAGGTCAGTGGAATTCCGAGTGTAGAGGTGAAATTCGTAGATATTCGGAAGAACACCAGTGGCGAAGGCGACTGACTGGACAAGTATTGACGCTGAGGTG
ASV_127	0	0	0	0	0	0	0	1064	0	0	0	0	0	333	0	0	0	0	0	0	0	Bacteria	WPS-2	NA	NA	NA	NA	NA	CGTTGTTCGGAATTATTGGGCGTAAAGCGCTCGTAGGCGGGACAGGAAGTCCGTGAAGAAAGACCTGGGCTCAACTCAGGGAACGGCACGGAAACTCTTGTTCTTGAGGCAATCAGAGGATGATGGAATTCCCGGTGTAGCGGTGAAATGCGTAGATATCGGGAGGAACACCAGTGGCGAAGGCGATCATCTGGGGTTGTTCTGACGCTGAGGAG
ASV_128	0	0	0	89	0	0	42	229	0	0	0	524	0	478	0	0	0	0	0	0	0	Bacteria	Firmicutes	Bacilli	Alicyclobacillales	Alicyclobacillaceae	Acidibacillus	NA	CGTTGTCCGGAATGACTGGGCGTAAAGCGCGCGCAGGCGGTTTCTTGCGTCTGAGGTGAAAGTTCAGGGCTCAACCCTGAGATGGCCTTGGAAACGGGGGAACTTGAGGGTCGGAGAGGTCAGGGGAATTCCACGTGTAGCGGTGAAATGCGTAGAGATGTGGAGGAATACCAGTGGCGAAGGCGCCTGACTGGACGAAACCTGACGCTGAGGCG
ASV_129	0	0	0	0	736	0	0	0	0	0	299	0	77	0	0	0	0	164	0	0	50	Bacteria	Verrucomicrobiota	Verrucomicrobiae	Chthoniobacterales	Chthoniobacteraceae	Chthoniobacter	NA	CGTTGTTCGGATTCATTGGGCGTAAAGGGAGCGTAGGTGGTCGGGTAAGTCAGATGTCAAATTTCGATGCTCAACGTCGAACCGCATTTGATACTGCCTGGCTAGAGGAATTGAGAGGAAGCCGGAATTCACGGTGTAGCAGTGAAATGCGTAGATATCGTGAGGAAGACCAACGGCGAAAGCAGGCTTCTGGAAATTTCCTGACACTGAGGCTC
ASV_130	0	0	0	0	0	0	0	0	0	0	0	0	0	0	0	0	266	1043	0	0	0	Bacteria	Acidobacteriota	Acidobacteriae	Subgroup 2	NA	NA	NA	CGTTGCTCGGAATTACTGGGTGTAAAGGGTTCGTAGGCGGTGTAGCAAGTCGGGAGTGAAATCTCTGGGCTCAACCCAGAGACTGCTTCCGAAACTGCTGTGCTTGAGTGTGGGAGAGGCGCGTGGAATTGCAGGTGTAGCGGTGAAATGCGTAGATATCTGCAGGAACACCCGTGGCGAAAGCGGCGCGCTGGACCACTACTGACGCTGAGGAA
ASV_131	0	0	0	3	0	0	0	0	0	0	0	0	0	0	0	0	0	0	1075	214	9	Bacteria	Chloroflexi	Anaerolineae	Thermoflexales	Thermoflexaceae	Thermoflexus	NA	CGTTACCCGGATTTACTGGGCGTAAAGTGCGCGTAGGCGGGGCCCTAAGTCGAGCGTGAAAGCCCCGGGCTCAACTCGGGGAGGCCGCTCGATACTGGGGCTCTTGAGGGCGGGAGAGGGTGGTGGAATTCCCGGTGTAGCGGTGAAATGCGTAGATATCGGGAGGAACACCGGTGGGGAAGCCGGCCACCTGGCCCGTCCCTGACGCTGAGGCG
ASV_132	0	0	0	0	80	0	10	0	60	678	70	0	22	0	210	109	11	0	0	0	51	Bacteria	Acidobacteriota	Acidobacteriae	Acidobacteriales	Acidobacteriaceae (Subgroup 1)	Acidipila-Silvibacterium	NA	CGTTGTTCGGAATTATTGGGCGTAAAGGGTGCGTAGGCGGTTGGATAAGTCTTGTGTGAAATCTTCGGGCTCAACTCGAAGTCTGCACGAGAAACTGTCTGGCTTGAGTATGGGAGAGGTGAGTGGAATTCCTGGTGTAGCGGTGAAATGCGTAGATATCAGGAGGAACACCTGTGGCGAAAGCGGCTCACTGGACCATAACTGACGCTGATGCA
ASV_133	0	0	861	0	0	338	20	0	0	0	0	7	0	0	0	0	0	0	0	68	0	Bacteria	Cyanobacteria	Cyanobacteriia	Cyanobacteriales	Nostocaceae	Fischerella PCC-9339	NA	CGTTATCCGGAATGATTGGGCGTAAAGCGTCCGCAGGTGGTTGTGTGTGTCTATTGTCAAAGGGTCATGCTTAACATGATAAAGGCAGTGGAAACTACACGACTAGAGTGCGTTCGGGGCAGAGGGAATTCCTGGTGTAGCGGTGAAATGCGTAGAGATCAGGAAGAACACCGGTGGCGAAAGCGCTCTGCTAGGCCGCAACTGACACTGAGGGA
ASV_135	0	0	0	0	164	0	0	0	289	90	66	0	0	0	136	141	134	203	0	16	27	Bacteria	Planctomycetota	Planctomycetes	Gemmatales	Gemmataceae	NA	NA	CGTTGTTCGGAATCACTGGGCTTAAAGGGCGCGTAGGCGGGTCATCAAGTCCGGGGTGAAAGCCCCCAGCTCAACTGGGGAAGTGCCTTGGATACTGGTGGTCTTGAGGGAGGTAGGGGCATGCGGAACTTCCGGTGGAGCGGTGAAATGCGTAGATATCGGAAGGAACGCCGGTGGCGAAAGCGGCGTGCTGGACCTCTTCTGACGCTGAGGCG
ASV_136	0	0	0	0	370	0	0	0	0	8	401	0	103	0	0	0	0	331	0	0	13	Bacteria	Acidobacteriota	Acidobacteriae	Acidobacteriales	NA	NA	NA	CGTTGTTCGGAATTATTGGGCGTAAAGGGTGCGTAGGCTGTGCGGTAAGTCACCTGTGAAAACTCTGGGCTCAACCCAGAGCCTGCAGGCGAAACTGCCGTGCTGGAGTATGGGAGAGGTGCGTGGAATTCCCGGTGTAGCGGTGAAATGCGTAGATATCGGGAGGAACACCTGTGGCGAAAGCGGCGCACTGGACCATTACTGACGCTGATGCA
ASV_137	0	0	0	0	405	0	0	0	341	89	382	0	0	0	0	0	0	0	0	0	0	Bacteria	NA	NA	NA	NA	NA	NA	CGTTACCCGGATTTACTGGGCGTAAAGCGCGTGTAGGTGGTTGGTTAAGCGTGATGTGAAAGCTTCCGGCTCAACCGGAAAACTGCATTGCGAACTGGCTGACTTGAGGACAGGAGAGGGAAGCGGAATTCCCGGTGTAGCGGTGAAATGCGTAGATATCGGGAGGAACACCAGAGGCGAAGGCGGCTTTCTGGCCTGAACCTGACACTGAGACG
ASV_138	0	0	5	34	0	0	165	886	0	0	0	0	0	123	0	0	0	0	0	0	0	Bacteria	Gemmatimonadota	Gemmatimonadetes	Gemmatimonadales	Gemmatimonadaceae	NA	NA	CGTTGTCCGGAATCACTGGGCGTAAAGGGCGCGTAGGTGGCTCTGTAAGTTTGCGGTGAAAGCCCGGGGCTCAACCCCGGGTCTGCCGTGAATACTGCAAGGCTTGAGTAGTGTAGAGGCAGGTAGAATATCGGGTGTAGCGGTGGAATGCGTAGAGATCCGATAGAAGACCGGTGGCGAAGGCGGCCTGCTGGGCACTAACTGACACTGAGGCG
ASV_139	0	0	0	0	0	0	0	0	32	40	0	0	171	0	14	228	233	382	7	50	30	Bacteria	Proteobacteria	Alphaproteobacteria	Rhizobiales	Hyphomicrobiaceae	Pedomicrobium	NA	CGTTGTTCGGAATCACTGGGCGTAAAGCGCACGTAGGCGGATGTGTCAGTCAGGGGTGAAATCCCGGGGCTCAACCTCGGAACTGCCTTTGATACAGCACGTCTTGAGTCCGGAAGAGGTGGGTGGAATTCCTAGTGTAGAGGTGAAATTCGTAGATATTAGGAAGAACACCGGTGGCGAAGGCGGCCCACTGGTCCGGTACTGACGCTGAGGTG
ASV_140	0	0	0	0	845	0	0	0	109	0	33	0	161	0	0	0	0	0	0	0	7	Bacteria	NA	NA	NA	NA	NA	NA	CGTTATCCAGATTTACTGGGCGTAAAGCGCGCGCAGGCGGATGATTAAGTCAGCTGTGAAAGCCCCCGGCTCAACTGGGGAGAGTCGGCTGAAACTGATCGTCTTGAGGGCAGCAGAGGAGTGTGGAATTGCGGGTGTAGTGGTGAAATGCGTAGATATCCGCAGGAACACCGGTGGCGAAGGCGGCACTCTGGGCTGAACCTGACGCTGAGGCG
ASV_141	0	0	544	79	0	15	248	5	0	0	0	180	0	83	0	0	0	0	0	0	0	Bacteria	Chloroflexi	Ktedonobacteria	Ktedonobacterales	Ktedonobacteraceae	NA	NA	CGTTGTCCGGAGTTACTGGGCGTAAAGGGCACGCAGGCGTGCTGCGCGTTTGGGGTGACAGCTCCCGGCTTCACTGGGAGAGCGCTTCAAAGACGGCAGCACTTGAGGACTGGAGAGGGAACGGGAACTCCTGGTGGAGCGGTGAAATGCGTAGAGATCAGGAAGAACACCGAAGGCGAAGGCACGTTCCTGGACAGGACCTGACGCTCAGGTGC
ASV_142	0	0	23	221	0	0	189	536	0	0	0	22	0	163	0	0	0	0	0	0	0	Bacteria	WPS-2	NA	NA	NA	NA	NA	CGTTGTTCGGAATTATTGGGCGTAAAGCGCTCGTAGGCGGGACAGGAAGTCCGTGAAGAAAGACCTGGGCTCAACTCAGGGAACGGCACGGAAACTCTTGTTCTTGAGGCAATCAGAGGATGATGGAATTCCCGGTGTAGCGGTGAAATGCGTAGATATCGGGAGGAACACCAGTGGCGAAGGCGATCATCTGGGGGTGTTCTGACGCTGAGGAG
ASV_143	0	0	0	162	0	239	100	0	0	0	0	420	0	225	0	0	0	0	0	0	0	Bacteria	Chloroflexi	Anaerolineae	NA	NA	NA	NA	CGTTACCCGGATTTACTGGGCGTAAAGCGTGTGCAGGCGGCTCGGCAGGTCGGGCGTGAAAGCCCCTGGCTCAACTGGGGGAGGCCGTCCGAAACCGTCGGGCTTGAGCACCGGAGAGGGACGTGGAATTCCCGGTGGAGCGGTGAAATGCGTAGAGATCGGGAGGAACACCAGTGGCGCAGGCGGCGTCCTGGCCGGTTGCTGACGCTCAGACA
ASV_144	0	0	0	26	74	0	28	0	0	571	397	0	14	0	0	0	0	34	0	0	0	Bacteria	Deinococcota	Deinococci	Deinococcales	Deinococcaceae	Deinococcus	NA	CGTTACCCGGAATCACTGGGCGTAAAGGGCGTGTAGGCGGGAAGTTAAGTCTGGCTTTAAAGACCGGGGCTCAACCTCGGGGATGGGCTGGATACTGGCTTTCTAGACCTCTGGAGAGGAACTCGGAATTTCTGGTGTAGCGGTGGAATGCGTAGATACCAGAAGGAACACCGATGGCGAAGGCAGAGTTCTGGACAGAAGGTGACGCTGAGGCG
ASV_145	0	0	0	0	404	0	0	0	11	131	463	0	35	0	0	24	0	46	0	9	11	Bacteria	Proteobacteria	Gammaproteobacteria	Xanthomonadales	Rhodanobacteraceae	Rhodanobacter	NA	CGTTACTCGGAATTACTGGGCGTAAAGGGTGCGTAGGTGGTTGTTTAAGTCTGCTGTGAAAGCCCCGGGCTCAACCTGGGAATGGCAGTGGATACTGGACAGCTAGAGTGCGGTAGAGGGTAGTGGAATTCCCGGTGTAGCAGTGAAATGCGTAGAGATCGGGAGGAACACCAGTGGCGAAGGCGGCTACCTGGACCAGCACTGACACTGAAGCA
ASV_146	0	0	0	0	718	0	0	0	49	44	110	0	165	0	0	4	0	0	0	0	42	Bacteria	Acidobacteriota	Acidobacteriae	Subgroup 2	NA	NA	NA	CGTTGTTCGGAATTACTGGGCGTAAAGGGTTCGTAGGCGGTGCGGCAAGTTGGGAGTGAAATCTCTGGGCTTAACCCAGAGACTGCTTTCAAAACTGCTGTGCTAGAGTATGAGAGAGGCTCGTGGAATTGCAGGTGTAGCGGTGAAATGCGTAGATATCTGCAGGAACACCCGTGGCGAAAGCGGCGAGCTGGATCATCACTGACGCTGAGGAA
ASV_147	0	0	621	0	0	288	41	0	0	0	0	0	0	24	0	0	0	0	0	4	147	Bacteria	Bacteroidota	Bacteroidia	Chitinophagales	Chitinophagaceae	Flaviaesturariibacter	NA	CGTTATCCGGATTCACTGGGTTTAAAGGGTGCGTAGGAGGGCAGGTAAGTCAGTGGTGAAATCTTCGGGCTTAACTCGGAAACTGCCGTTGATACTATCTGTCTTGAATATTGTGGAGGTGAGCGGAATATGTCATGTAGCGGTGAAATGCTTAGATATGACATAGAACACCAATTGCGAAGGCAGCTCGCTACACATATATTGACTCTGAGGCA
ASV_148	0	0	0	0	85	0	0	0	0	24	596	0	0	0	0	37	0	355	0	0	0	Bacteria	Proteobacteria	Gammaproteobacteria	WD260	NA	NA	NA	CGTTAATCGGAATTACTGGGCGTAAAGCGCGCGTAGACGGTTTTGTAAGTCAGATGTGAAATCCCTGGGCTCAACCTGGGAACTGCATTTGAAACTGCATGGCTAGAGTATGGTAGAGGGAAGTGGAATTTCCGGTGTAGCGGTGAAATGCGTAGATATCGGAAGGAACACCAGTGGCGAAAGCGACTTCCTGGGCCAATACTGACGTTCATGTG
ASV_149	0	0	30	125	43	28	259	11	71	89	21	13	0	58	66	183	76	0	8	11	0	Bacteria	Planctomycetota	Planctomycetes	Isosphaerales	Isosphaeraceae	NA	NA	CGTTATTCGGAATCACTGGGCTTAAAGCGCGTGTAGGCGGCCGGCACGTCGACGGCTGAAAGCCCCCGGCTCAACCGGGGAATGGGCCTCGATACGACCGGCCTGGAGGGGCGTAGGGGGACCGGGAACTTCCGGTGGAGCGGTGAAATGCGTTGAGATCGGAAGGAACGCCCGCGGCGAAAGCGCGGTCCTGGACGCCTGCTGACGCTGAGACG
ASV_151	0	1076	0	0	0	0	0	0	0	0	0	0	0	0	0	0	0	0	0	0	0	Bacteria	Deinococcota	Deinococci	Thermales	Thermaceae	Meiothermus	NA	TACGGAGGGTGCGAGCGTTACCCGGATTTACTGGGTGTAAAGGGCGTGTAGGCGGCTTCTCAAGTCCGGTGCTAAAGACCGAGGCTCAACCTCGGGAGTGCGCTGGATACTGTGGGGCTAGACGGTCGGAGAGGGCAGCGGAATTCTCGGAGTAGCGGTGAAATGCGCAGATACCGAGAGGAACGCCGATAGCGAAAGCAGCTGCCTGGACGATTTGTGACGCTGAGGCGCGAAAGCGTGGGGAGC
ASV_152	0	0	0	0	100	0	0	0	255	152	288	0	9	0	16	8	30	215	0	0	0	Bacteria	NA	NA	NA	NA	NA	NA	CGTTGTTCGGAATTATTGGGCGTAAAGCGTGCGTAGGCGGATCTGTAAGTCGGGGTTGAAATATCCGGGCTCAACTCGGGGCACGGCCTCGATACTGCAGATCTCGAGTCATGAAGAGGGTGATGGAATTCCCGGTGTAGCGGTGAAATGCGTAGATATCGGGAGGAACACCAGTGGCGAAGGCGGTCACCTGGTCATGCACTGACGCTGATGCA
ASV_153	0	0	271	0	0	439	173	0	0	0	0	187	0	0	0	0	0	0	0	0	0	Bacteria	Armatimonadota	Chthonomonadetes	Chthonomonadales	Chthonomonadaceae	Chthonomonas	NA	CGTTGTCCGGATTTACTGGGCGTAAAGGGCGCGTAGGCGGGCTAGAGGGTCTGCTGTGAAATTTTGGGGCTCAGCCCCAAGTTGTCGGCAGAAACCGCTAGTCTTGAAGCAGCTAGGGGGAGATGGAATTACCGGTGGAGTGGTGAAATGCGTAGAGATCGGTAGGAACACCCGTGGCGAAGGCGGTCTCCTGGGGCTGTCTTGACGCTGAGGCG
ASV_154	0	0	0	0	0	460	0	0	0	0	0	0	0	596	0	0	0	0	0	4	0	Archaea	Crenarchaeota	Nitrososphaeria	Nitrososphaerales	Nitrososphaeraceae	Candidatus Nitrocosmicus	NA	TGGTCGGGACGTTTATTGGGCCTAAAGCATCCGTAGCCGGTTCTACAAGTCTTCCGTTAAATCCACCTGCTTAACAGATGGGCTGCGGAAGATACTATAGAGCTAGGAGGCGGGAGAGGCAAGCGGTACTCGATGGGTAGGGGTAAAATCCGTTGATCCATTGAAGACCACCAGTGGCGAAGGCGGCTTGCCAGAACGCGCTCGACGGTGAGGGA
ASV_155	0	0	32	215	0	0	92	158	0	0	0	87	0	459	0	0	0	0	0	0	0	Bacteria	Chloroflexi	Ktedonobacteria	Ktedonobacterales	JG30-KF-AS9	NA	NA	CGTTGTCCGGAGTTACTGGGCGTAAAGGGTGCGCAGGCGGCCGGTCGCGTGTGCGGTGAAATCTCCTGGCTCAACTGGGAGGGGGCCGTGCAAACGGGCTGGCTTGAGGCTCGCAGGGGGGCGTGGAACTCCGGGTGGAGCGGTGAAATGCGTAGAGATCCGGAAGAACACCGACGGCGAAGGCAGCGCCCTGGACGAGACCTGACGCTCAGGCA
ASV_156	0	0	28	0	0	683	109	0	0	0	0	0	0	194	0	0	0	0	0	0	9	Bacteria	Chloroflexi	Ktedonobacteria	Ktedonobacterales	JG30-KF-AS9	NA	NA	CGTTGTCCGGAGTTACTGGGCGTAAAGGGTGCGTAGGCGGCCGCGCGCGTGGGGGGTGAAATCGCCCGGCTTACCTGGGCGGGGGCTTTCCAGACGGCGCGGCTTGAGGGACGGAGAGGGGCGTGGAATTCCGGGTGGAGCGGTGAAATGCGTAGAGATCCGGAGGAACACCGACGGCGAAGGCAGCGCCCTGGCCGTGCAATTGCCCTGACGCT
ASV_157	0	0	0	0	223	0	0	0	12	54	92	0	620	0	0	0	0	0	0	0	12	Bacteria	Planctomycetota	Planctomycetes	Gemmatales	Gemmataceae	NA	NA	CGTTGTTCGGAATCACTGGGCTTAAAGGGCGCGTAGGCGGTTTCTCAAGTCCGGGGTGAAAGCTTTCGGCTCAACCGGAAAAGGGCCTTGGAGACTGAGAAGCTGGAGGGAGGTAGGGGCAGCTGGAACTTCCGGTGGAGCGGTGAAATGCGTTGATATCGGAAGGAACGCCGGTGGCGAAAGCGAGCTGCTGGACCTCTACTGACGCTGAGGCG
ASV_158	0	0	0	0	0	0	0	0	715	0	18	0	0	0	0	210	4	0	0	12	52	Bacteria	Chloroflexi	Ktedonobacteria	Ktedonobacterales	JG30-KF-AS9	NA	NA	CGTTGTCCGGAATTATTGGGCGTAAAGGGCGCGCAGGCGGCCTGCCGCGTGTCTGGTGAAAGCGCCCGGCTTAACCGGGCGAGGTCCAGGCAAACGGGCAGGCTTGAGCGTCGGAGAGGGGCATGGAACTCCGGGTGGAGCGGTGAAATGCGTAGAGATCCGGAAGAACACCCATGGCGAAGGCAGTGCCCTGGCCGACGGCTGACGCTCAGGCG
ASV_159	0	0	0	33	0	511	117	0	11	0	0	228	0	57	51	0	0	0	0	0	0	Bacteria	Planctomycetota	Planctomycetes	Gemmatales	Gemmataceae	NA	NA	CGTTACTCGGATTCACTGGGCTTAAAGGGCGCGTAGGCGGTCGGCCAAGTCTTCGGTGAAAGCCCCCGGCTCAACCGGGGAATTGCCGTGGATACTGGTCGGCTCGAGGGGGAAAGGGGCCGCGGGAACTACCGGTGGAGCGGTGAAATGCGTTGATATCGGTAGGAACGCCGGTGGCGAAGGCGCGCGGCTGGGTCCCTTCTGACGCTGAGGCG
ASV_160	0	0	0	6	0	0	187	9	116	149	77	4	0	0	284	150	0	0	0	0	16	Bacteria	Proteobacteria	Alphaproteobacteria	Caulobacterales	Caulobacteraceae	NA	NA	CGTTGCTCGGAATTACTGGGCGTAAAGGGCGCGTAGGCGGATGTTTAAGTCAGAGGTGAAAGCCCAGGGCTCAACCTTGGAACTGCCTTTGATACTGGACATCTTGAGTATGGGAGAGGTGAGTGGAACTCCGAGTGTAGAGGTGAAATTCGTAGATATTCGGAAGAACACCAGTGGCGAAGGCGACTCACTGGCCCATTACTGACGCTGAGGCG
ASV_161	0	987	0	0	0	0	0	0	0	0	0	0	0	0	0	0	0	0	0	0	0	Bacteria	NA	NA	NA	NA	NA	NA	TACGTAGGAGGCAAGTGTTGTCCGGAGTACTGGGCGTAAAGCGTGTGTAGGCGGTGGTGTTTGTCTGGTGTGAAATCTCCCGGCTTACCTGGGAGGGGGCATCGGAAACGGCAGCACTTGAGGGCATCAGAGGCCAGTAGAACTCCCGGTGGACCAGTGAAATGGGTAGAGATCGGGAAGAATACCAGTGGTGCAGACGGCTGGCTGGGGTGTACCTGACGCTGAGACACGAAAGCATGGGGAGCA
ASV_162	0	0	0	0	124	0	0	0	0	0	0	0	862	0	0	0	0	0	0	0	0	Bacteria	Proteobacteria	Alphaproteobacteria	Rhizobiales	Beijerinckiaceae	Methylocapsa	NA	CGTTGTTCGGAATTACTGGGCGTAAAGCGCACGTAGGCGGATCTTTAAGTCAGGGGTGAAATCCCGAGGCTCAACCTCGGAACTGCCTTTGATACTGGGGATATCGAGTCCGGGAGAGGTGAGTGGAACTGCGAGTGTAGAGGTGAAATTCGTAGATATTCGCAAGAACACCAGTGGCGAAGGCGGCTCACTGGCCCGGTACTGACGCTGAGGTG
ASV_163	0	0	0	0	34	0	0	0	268	55	55	0	88	0	67	113	134	169	0	0	0	Bacteria	Acidobacteriota	FFCH5909	NA	NA	NA	NA	CGTTGTTCGGAATTACTGGGCGTAAAGGGCGCGTAGGCGGCCGGGTAGGTCGCATGTGAAAGCCGGGGGCTTAACCTCCGAAGGGCATGCGAAACCGCACGGCTTGAGGGTCGGAGGGGAAGGCGGAATTCCGGGTGTAGCGGTGAAATGCGTAGATATCCGGAGGAACACCGGTGGCGAAGGCGGCCTTCTGGACGACCACTGACGCTGAGGCG
ASV_164	0	0	0	0	0	0	0	0	0	0	0	0	0	0	0	0	187	790	0	0	0	Bacteria	Acidobacteriota	Acidobacteriae	Subgroup 2	NA	NA	NA	CGTTGCTCGGAATTACTGGGCGTAAAGGGTTCGTAGGCGGTGCGGCAAGTCAGGGGTGAAATCTCTGGGCTTAACCCAGAGGCTGCCTTTGAAACTGCCGTGCTCGAGTGCGGGAGAGGCGAGTGGAATTGCAGGTGTAGCGGTGAAATGCGTAGATATCTGCAGGAACACCCGGGGCGAAGGCGGCTCGCTGGACCGCAACTGACGCTGAGGAA
ASV_166	0	0	0	0	10	0	0	0	81	64	22	0	12	0	32	270	151	174	0	76	76	Bacteria	Cyanobacteria	Vampirivibrionia	Obscuribacterales	Obscuribacteraceae	NA	NA	CGTTGTCCGGATTTATTGGGCGTAAAGAGTTCGTAGGTGGTTTGTTAAGTCTGATGTTAAAGATCGGGGCCCAACCCCGGGACAGCATTGGATACTGGCAGACTGGAGTGTAGTAGAGGCAAGCGGAATTCCCAGTGTAGCGGTGAAATGCGTAGATATTGGGAAGAACACCAGTGGCGTAAGCGGCTTGCTGGGCTATAACTGACACTGAGGAA
ASV_167	0	0	0	0	161	0	0	0	0	0	0	0	16	0	0	92	319	244	0	44	86	Bacteria	Proteobacteria	Alphaproteobacteria	Rhizobiales	Xanthobacteraceae	NA	NA	CGTTGCTCGGAATCACTGGGCGTAAAGCGCACGTAGGCGGATTGTTAAGTCAGGGGTGAAATCCTGGAGCTCAACTCCAGAACTGCCTTTGATACTGGCGATCTTGAGTCCGGGAGAGGTGAGTGGAACTGCGAGTGTAGAGGTGAAATTCGTAGATATTCGCAAGAACACCAGTGGCGAAGGCGGCTCACTGGCCCGGTACTGACGCTGAGGTG
ASV_168	0	0	0	81	0	250	0	11	0	0	0	203	0	410	0	0	0	0	0	0	0	Bacteria	Deinococcota	Deinococci	Thermales	Thermaceae	Meiothermus	NA	CGTTACCCGGATTTACTGGGCGTAAAGGGCGTGTAGGCGGTCCTCTAAGTCCAAGGCTAAAGACTAGGGCTCAACCCTGGACCTGCCTCGGATACTGGAGGGCTCGACGGCTGGAGGGGGCAGCGGAATTTCCGGAGTAGCGGTGGAATGCGCAGATACCGGAAGGAACGCCAATAGCGAAGGCAGCTGCCTGGACAGTACGTGACGCTGAGGCG
ASV_169	952	0	0	0	0	0	0	0	0	0	0	0	0	0	0	0	0	0	0	0	0	Archaea	Crenarchaeota	Nitrososphaeria	Nitrososphaerales	Nitrososphaeraceae	Candidatus Nitrososphaera	NA	TACCAGCACCCCGAGTGGTCGGGACGATTATTGGGCCTAAAGCATCCGTAGCCTGTCCTGCAAGTCTTCCGTTAAATCCACCTGCTTAACAGATGGGCCGCGGAGGATACTACAGGGCTAGGAGGCGGGAGAGGCAAACGGTACTCAGTGGGTAGGGGTAAAATCCACTGATCCACTGAAGACCACCAGTGGCGAAGGCGGTTTGCCAGAACGCGCTCGACGGTGAGGGATGAAAGCTGGGGGAGC
ASV_170	0	0	371	0	0	546	0	0	0	0	0	0	0	26	0	0	0	0	0	0	0	Bacteria	Bacteroidota	Bacteroidia	Chitinophagales	Chitinophagaceae	Terrimonas	NA	CGTTATCCGGATTCACTGGGTTTAAAGGGTGCGTAGGTGGGTTGGTAAGTCAGTGGTGAAATCTCCAGGCTTAACTTGGAAACTGCCATTGATACTATCAGTCTTGAATACCGTGGAGGTCAGCGGAATATGTCATGTAGCGGTGAAATGCTTAGATATGACATAGAACACCAATTGCGAAGGCAGCTGGCTACACGAATATTGACACTGAGGCA
ASV_171	0	0	0	407	0	0	159	85	0	0	0	185	0	101	0	0	0	0	0	0	0	Bacteria	Proteobacteria	Gammaproteobacteria	Xanthomonadales	Rhodanobacteraceae	Mizugakiibacter	NA	CGTTAATCGGAATTACTGGGCGTAAAGCGTGCGTAGGTGGTTCGTTAAGTCCGTTGTGAAAGCCCCGAGCTCAACTCGGGAATTGCAGTGGATACTGATGAGCTGGAGTGCGGTAGAGGAAGGTGGAATTCCCGGTGTAGCGGTGAAATGCGTAGAGATCGGGAGGAACACCAGTGGCGAAGGCGGCCTTCTGGACCAGCACTGACACTCAAGCA
ASV_172	0	0	0	0	295	0	0	0	10	60	359	0	77	0	0	0	0	113	0	0	0	Bacteria	Actinobacteriota	Thermoleophilia	Solirubrobacterales	Solirubrobacteraceae	NA	NA	CGTTGTCCGGAATTATTGGGCGTAAAGAGCGTGTAGGCGGCCCGATTAGTCCGCTGTGAAAGTCCAGGGCTCAACCCTGGAATGCCGGTGGATACTGTCGGGCTAGAGTCCGGAAGGGGCGAGTGGAATTCCTGGTGTAGCGGTGAAATGCGCAGATATCAGGAGGAACACCAATGGCGAAGGCAGCTCGCTGGGACGTGACTGACGCTGAGACG
ASV_173	0	0	0	6	31	0	19	0	62	66	117	8	0	0	139	208	92	144	0	10	10	Bacteria	Chloroflexi	NA	NA	NA	NA	NA	CGTTGTCCGGATTTATTGGGCGTAAAGCGCGCGCAGGCGGCCGGATCAGTCCGCGGTGAAATCTCCCTGGCTCAACCGGGAGGGGGCCGTGGAGACTGTCTGGCTGGAGGGACCTAGAGGCCGGTGGAATTCCCGGTGTAGTGGTGAAATGCGTAGAGATCGGGAGGAACACCCGTGGCGAAGGCGGCCGGCTGGGGGTGCCCTGACGCTGAGGC
ASV_174	0	0	0	0	354	0	0	0	90	60	34	0	23	0	0	37	51	259	0	0	0	Bacteria	Planctomycetota	Pla4 lineage	NA	NA	NA	NA	CGTTGTTCGGATTCACTGGGCGTAAAGGGCACGTAGGCGGCTCGGCAAATCGGTCGTGGAATCTCGACGCTTACCGTCGAAACGGCGGCCGAAAATACCGGGCTAGAGGGCGTGAGAGGTCACTGGAACTCCTGGTGAAGCGGTGAAATGCGTAGATATCAGGAGGAACGCCGGAGGCGAAAGCGAGTGACTGGCGCGTTCCTGACGCTGAGGTG
ASV_175	0	0	0	0	365	0	0	0	85	104	148	0	5	0	29	53	33	67	0	0	14	Bacteria	Actinobacteriota	Thermoleophilia	Solirubrobacterales	Solirubrobacteraceae	NA	NA	CGTTGTCCGGAATCATTGGGCGTAAAGAGCGTGTAGGCGGCTCGGTAAGTCCGCTGTGAAAGTCCAGGGCTCAACCCTGGAATGCCGGTGGAAACTGCTGGGCTAGAGTCCGGAAGGGGTGAGTGGAATTCCTGGTGTAGCGGTGAAATGCGCAGATATCAGGAGGAACACCAATGGCGAAGGCAGCTCACTGGGACGGTACTGACGCTGAGACG
ASV_176	0	0	114	0	0	145	6	0	10	85	0	0	0	0	142	113	13	0	0	32	237	Bacteria	Acidobacteriota	Blastocatellia	Pyrinomonadales	Pyrinomonadaceae	RB41	NA	CGTTGTTCGGATTTACTGGGCGTAAAGGGCGCGTAGGCGGCGTGACAAGTCGGTTGTGAAATCTCGAAGCTCAACTTCGAGCGGTCAACCGATACTGTCGTGCTAGAGTGCAGAAGGGGCAACTGGAATTCTCGGTGTAGCGGTGAAATGCGTAGATATCGAGAGGAACACCTGCGGCGAAGGCGGGTTGCTGGGCTGACACTGACGCTGAGGCG
ASV_177	718	178	0	0	0	0	0	0	0	0	0	0	0	0	0	0	0	0	0	0	0	Bacteria	Nitrospirota	Nitrospiria	Nitrospirales	Nitrospiraceae	Nitrospira	NA	TACGAAGGTGGCAAGCGTTGTTCGGATTTACTGGGCGTAAAGGGAGCGTAGGCGGTTTGGTAAGACCGGTGGGAAAGCCCGGAGCTTAACTCCGGAAGGTCACCGGTGACTGCCAAGCTAGAGGACGGGAGAGGAGCGCGGAATTCCCGGTGTAGCGGTGAAATGCGTAGAGATCGGGAGGAAGGCCGGTGGCGAAGGCGGCGCTCTGGAACGTTCCTGACGCTGAGGCTCGAAAGCGTGGGGAGC
ASV_178	0	0	0	11	0	0	138	569	0	0	0	0	0	178	0	0	0	0	0	0	0	Bacteria	Proteobacteria	Gammaproteobacteria	Xanthomonadales	Rhodanobacteraceae	Dokdonella	NA	CGTTACTCGGAATTACTGGGCGTAAAGCGTGCGTAGGCGGTTTGTTAAGTCTGTCGTGAAAGCCCTGGGCTCAACCTGGGAATGGCGATGGATACTGGCAAGCTAGAGTACGGTAGAGGATGGTGGAATTCCCGGTGTAGCGGTGAAATGCGTAGAGATCGGGAGGAACACCTGTGGCGAAGGCGGCCATCTGGACCAGTACTGACGCTGAGGCA
ASV_179	0	893	0	0	0	0	0	0	0	0	0	0	0	0	0	0	0	0	0	0	0	Bacteria	Planctomycetota	Planctomycetes	Gemmatales	Gemmataceae	NA	NA	GACGAACCGTGCAAACGTTGTTCGGAATCACTGGGCTTAAAGGGCGCGTAGGCGGCCAGCCAAGTCGGGGGTGAAATCTTTCGGCTCAACCGGAAAAGTGCCTTCGATACTGGCTGGCTGGAGGGAGGTAGGGGCATGTGGAACTTCCGGTGGAGCGGTGAAATGCGTTGATATCGGAAGGAACGCCGGTGGCGAAAGCGACGTGCTGGACCTCTTCTGACGCTGAGGCGCGAAAGCTAGGGTAGC
ASV_180	0	890	0	0	0	0	0	0	0	0	0	0	0	0	0	0	0	0	0	0	0	Bacteria	Proteobacteria	Gammaproteobacteria	Gammaproteobacteria Incertae Sedis	Unknown Family	Acidibacter	NA	TACAGAGGGTGCGAGCGTTAATCGGAATTACTGGGCGTAAAGCGTGCGTAGACGGTTATGTAAGTCGGGTGTGAAAGCCCCGGGCTCAACCTGGGAATGCCATTCGAAACTGCATAGCTAGGGTGCGGAAGAGGGAAGCGGAATTTCAGGTGTAGCGGTGAAATGCGTAGATATCTGAAGGAACACCAGTGGCGAAAGCGGCTTCCTGGTCCAGCACCGACGTTCAGGCACGAAAGCGTGGGGAGC
ASV_182	0	0	0	0	537	0	0	0	118	0	57	0	173	0	0	0	0	0	0	0	0	Bacteria	Acidobacteriota	Holophagae	Subgroup 7	NA	NA	NA	CGTTATTCGGAATTATTGGGCGTAAAGGGCGCGTAGGCGGCCTGGCAAGTGGATGGTGAAATCCCTCGGCTTAACCGAGGAACTGCCATCCAGACTGTTAGGCTTGAGACCGGGAGAGGTGAGTGGAATTCCCAGTGTAGCGGTGAAATGCGTAGATATTGGGAGGAACACCAGTGGCGAAGGCGGCTCACTGGACCGGTACTGACGCTGAGGCG
ASV_183	0	0	0	0	74	0	0	0	114	84	98	0	0	0	32	75	101	145	0	65	79	Bacteria	Proteobacteria	Alphaproteobacteria	Rhizobiales	Xanthobacteraceae	NA	NA	CGTTGCTCGGAATCACTGGGCGTAAAGCGCACGTAGGCGGCTTTTTAAGTCAGGGGTGAAATCCTGGAGCTCAACTCCAGAACTGCCTTTGATACTGAGAAGCTTGAGTCCGGGAGAGGTGAGTGGAACTGCGAGTGTAGAGGTGAAATTCGTAGATATTCGCAAGAACACCAGTGGCGAAGGCGGCTCACTGGCCCGGTACTGACGCTGAGGTG
ASV_184	0	0	0	0	0	0	0	0	0	0	0	0	0	0	2	3	15	618	0	115	105	Bacteria	Deinococcota	Deinococci	Deinococcales	Deinococcaceae	NA	NA	CGTTACCCGGAATCACTGGGCGTAAAGGGCGCGTAGGCGGCCTCTCAAGTCCGGTTTTAAAGACCGAAGCTCAACTTCGGGCCTGGACTGGATACTAGGAGGCTAGACGACTGGAGGGGCGGGTGGAATTCTCGGTGTAGCGGTGGAATGCGTAGATACCGAGAGGAACACCAGTGGCGAAGGCGGCCCGCTGGACAGTGCGTGACGCTGAGGCG
ASV_186	0	0	177	67	0	259	25	0	102	0	0	155	0	56	0	0	0	0	0	0	0	Bacteria	Nitrospirota	Nitrospiria	Nitrospirales	Nitrospiraceae	Nitrospira	NA	CGTTGTTCGGATTTACTGGGCGTACAGGGAGCGTAGGCGGTTCGGTAAGCCCTCTGGGAAAGCTCCTGGCTTAACCAGGAAAGGTCGGAGGGGACTGCCGGGCTAGAGGACGGGAGAGGAGCGCGGAATTCCCGGTGTAGCGGTGAAATGCGTAGAGATCGGGAGGAAGGCCGGTGGCGAAGGCGGCGCTCTGGAACGCGCCTGACGCTGAGGCT
ASV_187	836	0	0	0	0	0	0	0	0	0	0	0	0	0	0	0	0	0	0	0	0	Bacteria	Chloroflexi	KD4-96	NA	NA	NA	NA	TACGTAGGTGGCAAGCGTTGTCCGGATTTACTGGGCGTAAAGAGCGCGCAGGCGGTCGGCCAAGTCGAGTGTGAAAGCCCCCGGCTCAACTGGGGAGGGTCACTCGATACTGGTCGACTCGAAGGCGGGAGAGGGAAGCGGAATTCCCGGTGTAGCGGTGAAATGCGTAGATATCGGGAGGAACACCAGTGGCGAAGGCGGCTTCCTGGCCCGTTCTTGACGCTGAGGCGCGAAAGCTAGGGGAGC
ASV_188	0	0	16	0	0	41	0	0	208	25	0	0	0	0	0	56	0	0	0	0	488	Bacteria	Proteobacteria	Alphaproteobacteria	Reyranellales	Reyranellaceae	Reyranella	NA	CGTTGTTCGGAATTACTGGGCGTAAAGCGCGTGTAGGCGGTTGTTCAAGTCGGATGTGAAAGCCTTGAGCTCAACTCAAGAAATGCACTCGGTACTGGATGACTAGAGGACCGGAGAGGATAGTGGAATTCCCAGTGTAGTGGTGAAATACGTAGAGATTGGGAAGAACACCAGTGGCGAAGGCGGCTATCTGGACGGTTTCTGACGCTAAGACG
ASV_189	0	0	0	0	0	0	0	0	0	0	0	0	0	0	107	62	63	136	11	125	321	Bacteria	Proteobacteria	Alphaproteobacteria	Rhizobiales	Rhizobiales Incertae Sedis	Alsobacter	metallidurans	CGTTGCTCGGAATCACTGGGCGTAAAGCGCACGTAGGCGGATCTTTAAGTCAGGGGTGAAATCCCAAGGCTCAACCTTGGAACTGCCTTTGATACTGGGGATCTCGAGTCCGGAAGAGGTTGGTGGAACTGCGAGTGTAGAGGTGAAATTCGTAGATATTCGCAAGAACACCAGTGGCGAAGGCGGCCAACTGGTCCGGTACTGACGCTGAGGTG
ASV_190	0	823	0	0	0	0	0	0	0	0	0	0	0	0	0	0	0	0	0	0	0	Bacteria	Acidobacteriota	Acidobacteriae	Acidobacteriales	Koribacteraceae	Candidatus Koribacter	NA	TACAGAGGGTGCAAGCGTTGTTCGGAATTATTGGGCGTAAAGGGCGCGTAGGCGGTGCGGTAAGTCTTCTGTGAAATCTCCGGGCTCAACTCGGAGCCTGCAGGGGAAACTGCCGTGCTGGAGTATGGGAGAGGTGAGTGGAATTCCCGGTGTAGCGGTGAAATGCGTAGATATCGGGAGGAACACCTGTGGCGAAAGCGGCTCACTGGACCATTACTGACGCTGATGCGCGAAAGCTAGGGGAGC
ASV_191	0	0	0	0	0	0	0	0	0	0	0	697	0	0	0	0	0	0	0	110	0	Archaea	Crenarchaeota	Nitrososphaeria	SCGC AB-179-E04	NA	NA	NA	GATGTGTCAGCGCCGCGGTAATACCAGCTCCCCGAGTGGTCGGGACGATTATTGGGCCTAAAGCATCCGTAGCCGGCTTCACAGGTCTCTTGTTAAATCCAACGGCTCAACCGTTGGACCGCAGGAGATACCATGGAGCTAGGGGGCGGGAGAGGCGGACGGTACTCCATGGGTAGGGGTAAAATCCTTTGATCCATGGAAGACCACCAGTGGCG
ASV_192	0	0	0	0	181	0	0	0	236	73	234	0	76	0	0	0	0	0	0	0	0	Bacteria	Acidobacteriota	Blastocatellia	Blastocatellales	Blastocatellaceae	NA	NA	CGTTGTTCGGATTTACTGGGCGTAAAGGGCGCGTAGGCGGCGTGACAAGTCACTTGTGAAATCTCCGGGCTTAACTCGGAGCGGTCAAGTGATACTGTCGTGCTAGAGTGCAGAAGGGGCAACTGGAATTCTTGGTGTAGCGGTGAAATGCGTAGATATCAAGAGGAACACCTGAGGCGAAGGCGGGTTGCTGGGCTGACACTGACGCTGAGGCG
ASV_193	0	0	0	0	0	0	0	0	0	0	0	0	0	0	42	0	0	0	0	136	615	Bacteria	Proteobacteria	Alphaproteobacteria	Rhizobiales	Xanthobacteraceae	Pseudolabrys	NA	CGTTGCTCGGAATTACTGGGCGTAAAGCGCACGTAGGCGGCTTGTTAAGTCGGAGGTGAAATCCTGGAGCTCAACTCCAGAACTGCCTTCGATACTGGCGAGCTCGAGTTCGGGAGAGGTGAGTGGAACTGCGAGTGTAGAGGTGAAATTCGTAGATATTCGCAAGAACACCAGTGGCGAAGGCGGCTCACTGGCCCGATACTGACGCTGAGGTG
ASV_194	0	0	0	0	0	0	0	579	0	0	0	0	0	208	0	0	0	0	0	0	0	Archaea	Crenarchaeota	Nitrososphaeria	Nitrososphaerales	Nitrososphaeraceae	Candidatus Nitrocosmicus	NA	TGGTCGGGACGTTTATTGGGCCTAAAGCATCCGTAGCCGGTTCTACAAGTCTTCCGTTAAATCCACCTGCTCAACAGATGGGCTGCGGAAGATACTATAGAGCTAGGAGGCGGGAGAGGCAAGCGGTACTCGATGGGTAGGGGTAAAATCCGTTGATCCATTGAAGACCACCAGTGGCGAAGGCGGCTTGCCAGAACGCGCTCGACGGTGAGGGA
ASV_195	0	0	0	132	27	0	19	277	0	0	0	0	0	82	0	5	7	12	0	63	162	Bacteria	Proteobacteria	Alphaproteobacteria	Sphingomonadales	Sphingomonadaceae	Sphingomonas	NA	CGTTATTCGGAATTACTGGGCGTAAAGCGCACGTAGGCGGCTTTGTAAGTAAGAGGTGAAAGCCTGGTGCTCAACACCAGAACTGCCTTTTAGACTGCATCGCTTGAATCCAGGAGAGGTGAGTGGAATTCCGAGTGTAGAGGTGAAATTCGTAGATATTCGGAAGAACACCAGTGGCGAAGGCGGCTCACTGGACTGGTATTGACGCTGAGGTG
ASV_196	0	0	0	0	0	0	0	0	0	0	0	0	0	0	0	0	0	0	776	0	0	Bacteria	Fervidibacteria	NA	NA	NA	NA	NA	CGTTGCCCGGATTTACTGGGCTTAAAGGGTCCGTAGGCGTGTCCTAAGTCCTCCGTGAAAGTGCCCGCTTAACGGGCAGAGGTCGGGGGAGACTGGGACACTTGAGGGCGGAAGAGGCCGGCGGAACGGCGGGTGTAGCGGTGAAATGCGTCGATATCCGCCGGAACACCAGTGGCGAAGGCGGCCGGCTGGGACGCCCCTGACGCTGAGGGACG
ASV_197	773	0	0	0	0	0	0	0	0	0	0	0	0	0	0	0	0	0	0	0	0	Bacteria	Chloroflexi	Anaerolineae	SBR1031	NA	NA	NA	AACGTAGGAGGCAAGCGTTACCCGGATTTACTGGGCGTAAAGCGTGTGCAGGCGGCTCGGCAGGTCGGGCGTGAAAGCCCCTGGCTCAACTGGGGGAGGCCGTCCGAAACCGTCGGGCTTGAGCACCGGAGAGGGACGTGGAATTCCCGGTGGAGCGGTGAAATGCGTAGAGATCGGGAGGAACACCAGTGGCGCAGGCGGCGTCCTGGCCGGTTGCTGACGCTCAGACACGAAAGCTTGGGGAGC
ASV_198	0	0	0	0	0	0	0	0	17	0	7	0	0	0	2	51	362	321	0	0	0	Bacteria	Armatimonadota	Fimbriimonadia	Fimbriimonadales	Fimbriimonadaceae	NA	NA	CGTTGTCCGGATTTACTGGGCGTAAAGAGCGCGTAGGCGGTCCGTTAAGTGTGAAGTGAAATCTCCAGGGCTCAACCCGGAAACTGCTTTACATACTGGCGGACTGGAGGGATGCAGAGGTTTGTGGAATTCCTGGTGTAGCGGTGAAATGCGTTGATATCAGGAGGAACACCCATGGCGAAGGCAGCAAACTGGGCATCATCTGACGCTGAGGC
ASV_199	0	0	175	0	0	537	31	0	0	0	0	0	0	15	0	0	0	0	0	0	0	Bacteria	Bacteroidota	Bacteroidia	Chitinophagales	Chitinophagaceae	NA	NA	CGTTATCCGGATTCACTGGGTTTAAAGGGTGCGTAGGCGGATAGGTAAGTCCGTGGTGAAATCCTGCAGCTTAACTGCAGAACTGCCGTGGATACTATCTATCTTGAATGTCGTGGAGGTTAGCAGAATATGTCATGTAGCGGTGAAATGCTTAGATATGACATAGAATACCCATTGCGAAGGCAGCTAACTACGCGATAATTGACGCTGAGGCA
ASV_200	0	0	0	0	249	0	0	0	86	87	50	0	178	0	4	8	48	48	0	0	0	Bacteria	Planctomycetota	Planctomycetes	Gemmatales	Gemmataceae	NA	NA	CGTTGTTCGGAATCACTGGGCTTAAAGGGCGCGTAGGCGGGCAGCCAAGTCTGAGGTGAAATCTTTCGGCTTAACCGGAAAATAGCCTTGGATACTGGCAGTCTCGAGGGAGGTAGGGGCATGTGGAACTTCCGGTGGAGCGGTGAAATGCGTTGATATCGGAAGGAACGCCGGTGGCGAAAGCGACGTGCTGGACCTCTACTGACGCTGAGGCG
ASV_201	0	0	0	0	187	0	0	0	0	56	499	0	0	0	0	0	0	0	0	0	8	Bacteria	Acidobacteriota	Blastocatellia	Pyrinomonadales	Pyrinomonadaceae	RB41	NA	CGTTGTTCGGATTTACTGGGCGTAAAGGGCGCGTAGGCGGCGTGACAAGTCACTTGTGAAATCTCCGGGCTTAACCCGGAGCGGTCAAGTGATACTGTCGTGCTAGAGTGCAGAAGGGGCAACTGGAATTCTTGGTGTAGCGGTGAAATGCGTAGATATCAAGAGGAACACCTGCGGCGAAGGCGGGTTGCTGGGCTGACACTGACGCTGAGGCG
ASV_202	0	0	0	0	78	0	0	0	70	25	19	0	0	0	39	70	81	56	0	0	309	Bacteria	Proteobacteria	Alphaproteobacteria	Rhizobiales	Rhodomicrobiaceae	Rhodomicrobium	vannielii	CGTTGTTCGGAATCACTGGGCGTAAAGCGTACGCAGGCGGATTGATAAGTCAGGGGTGAAATCCCGGGGCTCAACCTCGGAATTGCCTTTGATACTGTCTATCTTCGAGTTCGGGAGAGGTTGGCGGAATTCCTAGTGTAGAGGTGAAATTCGTAGATATTAGGAAGAACACCAGTGGCGAAGGCGGCCAACTGGCCCGATACTGACGCTCATGT
ASV_203	0	0	0	0	0	0	0	0	0	0	0	0	0	0	118	125	18	0	0	70	416	Bacteria	Proteobacteria	Alphaproteobacteria	Rhizobiales	Beijerinckiaceae	NA	NA	CGTTGTTCGGAATCACTGGGCGTAAAGCGCACGTAGGCGGATTTTTAAGTCAGGGGTGAAATCCCAAGGCTCAACCTTGGAACTGCCTTTGATACTGGAGATCTTGAGTCCGGGAGAGGTGAGTGGAACTGCGAGTGTAGAGGTGAAATTCGTAGATATTCGCAAGAACACCAGTGGCGAAGGCGGCTCACTGGCCCGGAACTGACGCTGAGGTG
ASV_206	0	0	0	0	0	0	0	0	187	0	0	0	0	0	174	360	0	0	0	0	0	Bacteria	Chloroflexi	Ktedonobacteria	Ktedonobacterales	Ktedonobacteraceae	1921-2	NA	CGTTGTCCGGAGTTACTGGGCGTAAAGGGCACGCAGGCGGTCTGCCACGTTTGCCATGACAGGGTCGGGCTTCACTCGACCAGGAGGGCGAAAACGAGCGGACTTGAGGCTTGGAGAGGGACCTGGAATTCCGGGTGGAGTGGTGAAATGCGTAGAGATCCGGAGGAACACCGAAGGCGAAGGCAGGGTCCTGGCCAAGAACTGACGCTGAGGTG
ASV_207	0	0	0	0	0	0	0	0	117	0	0	0	0	0	27	389	94	74	0	0	17	Bacteria	Chloroflexi	Ktedonobacteria	Ktedonobacterales	Ktedonobacteraceae	FCPS473	NA	CGTTATCCGGAATTATTGGGCGTAAAGGGTGTGCAGGCGGCTTACCAAGTTCGCGGCGACAGCCATCGGCTTAACCGATGGAGGACTGCGAAAGCTGGTAAACTTGAGAGCGAGAGAGGGACATGGAACTCCGGGTGGAGCAGTGAAATGCGTAGAGATCCGGAAGAACACCAACGGCGAAGGCAATGTCCTAGCTCGTCTCTGACGCTCAAGCA
ASV_208	0	0	0	0	0	0	25	479	0	0	0	0	0	212	0	0	0	0	0	0	0	Bacteria	Chloroflexi	Chloroflexia	Elev-1554	NA	NA	NA	CGTTGTCCGGATTTATTGGGCGTAAAGGGCGCGTAGGCGGCCTGGCGCATCCGGCGTGAAATCTCCCCGCTCAACGGGGAGGGGTCGGCGGAGATGGCCAGGCTCGAGGGCGGTAGAGGCAGATGGAAGTCCCGAAGTAGTGGTGAAATGCGTAGAGATCGGGAGGAACACCAGAGGCGAAGGCGATCTGCTGGGCCGACCCTGACGCTGAGGCG
ASV_209	0	0	90	129	0	33	93	0	0	0	6	228	0	116	0	0	0	0	10	0	5	Bacteria	Firmicutes	Sulfobacillia	Sulfobacillales	Sulfobacillaceae	NA	NA	CGTTGTCCGGAATGACTGGGCGTAAAGGGCGTCTAGGCGGCACGACGCGTCGGGAGTGAAAGGCGCGGGCTCAACCCGCGGAGGGCTCTCGAAACGGTCGAGCTGGAGGGCCGGAGAGGGAAGCGGAATTGCCGGTGTAGCGGTGAAATGCGTAGAGATCGGCAGGAACACCAGTGGCGAAGGCGGCTTCCTGGACGGTACCTGACGCTGAAGCG
ASV_210	0	0	103	65	0	32	39	0	0	0	0	352	0	115	0	0	0	0	0	0	0	Bacteria	Firmicutes	Sulfobacillia	Sulfobacillales	Sulfobacillaceae	NA	NA	CGTTGTCCGGAATCACTGGGCGTAAAGGGCGTGTAGGCGGCACGCGACGTCGGGGGTGAAATCCCCGGGCTCAACTCGGGGGGGTCCTTCGAAACGGGCGAGCTAGAGGGCAGGAGAGGCAAGCGGAACTCCCGGTGTAGCGGTGATATGCGTAGATATCGGGAAGAACACCAGTGGCGAAGGCGGCTTGCTGGACTGCACCTGACGCTGAGGCG
ASV_211	403	302	0	0	0	0	0	0	0	0	0	0	0	0	0	0	0	0	0	0	0	Bacteria	Acidobacteriota	Acidobacteriae	Bryobacterales	Bryobacteraceae	Bryobacter	NA	TACGTAGGCAGCAAGCGTTGTTCGGAGTTACTGGGCGTAAAGAGTGCGTAGGCGGTCTGGCAAGTTCGGTGTGAAATCTCCCGGCTTAACCGGGAGGGTGCGCCGAAGACTGTCGGGCTGGAGTGTGGGAGAGGCAGGCGGAATTCCTGGTGTAGCGGTGAAATGCGTAGATATCAGGAGGAACACCGGTGGTGTAGGCGGCCTGCTGGACCATAACTGACGCTGAGGCACGAAAGCGTGGGGAGC
ASV_212	702	0	0	0	0	0	0	0	0	0	0	0	0	0	0	0	0	0	0	0	0	Bacteria	Deinococcota	Deinococci	Thermales	Thermaceae	Meiothermus	NA	TACGGAGGGTGCGAGCGTTACCCGGATTTACTGGGCGTAAAGGGCGTGTAGGCGGTCCTCTAAGTCCAAGGCTAAAGACTAGGGCTCAACCCTGGACCTGCCTCGGATACTGGAGGGCTCGACGGCTGGAGGGGGCAGCGGAATTTCCGGAGTAGCGGTGAAATGCGCAGATACCGGAAGGAACGCCAATAGCGAAGGCAGCTGCCTGGACAGTACGTGACGCTGAGGCGCGAAAGCGTGGGGAGC
ASV_213	0	0	0	0	0	0	0	0	36	219	306	0	125	0	4	10	2	0	0	0	0	Bacteria	Methylomirabilota	Methylomirabilia	Rokubacteriales	NA	NA	NA	CGTTGCTCGGAATCACTGGGCGTAAAGGGCGCGTAGGCGGGATGGCAAGTCGGTCGTGAAATCTCTCGGCTCAACCGAGAAACGTCGGCCGATACTGCCGTTCTTGAGGGATGCAGAGGAGACTGGAATTCCCGGTGTAGCGGTGAAATGTGTAGAGATCGGGAGGAACACCGGTGGCGAAGGCGGGTCTCTGGGCATTTCCTGACGCTGAGGCG
ASV_214	0	0	0	0	559	0	0	0	0	0	0	0	78	0	0	0	0	60	0	0	0	Bacteria	Actinobacteriota	Acidimicrobiia	IMCC26256	NA	NA	NA	CGTTGTCCGGATTTATTGGGCGTAAAGAGCTCGTAGGCGGTTCGGTTAGTCGGGTGTGAAATCTCCACGCTCAACGTGGAGGGGCCACTCGATACTGCCGTGACTCGAGTCCGGTAGAGGAGTGTGGAATTCCCGGTGTAGCGGTGAAATGCGCAGATATCGGGAGGAACACCAGTAGCGAAGGCGGCACTCTGGGCCGGAACTGACGCTGAGGA
ASV_215	0	0	0	0	11	0	0	0	420	57	91	0	0	0	0	9	0	100	0	0	0	Bacteria	Cyanobacteria	Cyanobacteriia	Cyanobacteriales	Nostocaceae	Nostoc PCC-73102	NA	CGTTATCCGGAATGATTGGGCGTAAAGCGTCCGCAGGTGGCAATGTAAGTCTGCTGTTAAAGAGTCTAGCTCAACTAGATAAAAGCAGTGGAAACTACATAGCTAGAGTACGTTCGGGGCAGAGGGAATTCCTGGTGTAGCGGTGAAATGCGTAGAGATCAGGAAGAACACCGGTGGCGAAGGCGCTCTGCTAGGCCGTAACTGACACTGAGGGA
ASV_216	0	0	0	0	17	0	0	0	8	34	131	0	7	0	35	85	246	104	0	0	15	Bacteria	Armatimonadota	Chthonomonadetes	Chthonomonadales	Chthonomonadaceae	Chthonomonas	NA	CGTTGTCCGAAGTTACTGGGCGTAAAGGGCGCGTAGGCGGGTTGGTAAGTCTGCCGTGAAAGCCCGGGGCTTAACCCCGGAGGGTCGGTGGATACTGCCAGTCTTGAAGTGGCTAGGGGAAGATGGAATTACCGGTGTAGCGGTGAAATGCGTAGATATCGGTAGGAACACCAGTGGCGAAGGCGGTCTTCTGGGGCTCACTTGACGCTGAGGCG
ASV_217	0	0	0	0	152	0	0	0	2	82	56	0	9	0	20	117	34	200	0	0	0	Bacteria	Myxococcota	Polyangia	Haliangiales	Haliangiaceae	Haliangium	NA	CGTTGCTCGGAATTATTGGGCGTAAAGCGCACGTAGGCGGCATGGCAAGTCGGATGTGAAATCCCTTGGCTTAACCAAGGAAGTGCATCCGAAACTGCCGTGCTTGAGTACTTAAGAGGATCGCGGAATTCCCGGTGTAGAGGTGAAATTCGTAGATATCGGGAGGAACACCAGTGGCGAAGGCGGCGATCTGGGAAGATACTGACGCTGAGGTG
ASV_218	0	0	0	0	64	0	0	0	0	0	117	0	0	0	0	26	147	316	0	0	0	Bacteria	Firmicutes	NA	NA	NA	NA	NA	CGTTGTCCGGAATTATTGGGCGTAAAGAGCGAGCAGGCGGCATATCAAGTTGGACGTGAAATTTTAGGGCTTAACCCTAAAGGGTCGTCCAAAACTGGTAAGCTAGAGTGCAGGAGAGGAAAGCGGAATTCCCGGTGTAGTGGTGAAATGCGTAGATATCGGGAGGAACACCAGAGGCGAAGGCGGCTTTCTGGCCTGTAACTGACGCTGAGGCG
ASV_219	0	0	0	0	0	0	0	0	0	0	0	0	0	0	0	0	0	0	0	54	606	Bacteria	Proteobacteria	Alphaproteobacteria	Sphingomonadales	Sphingomonadaceae	Sphingomonas	ginsengisoli	CGTTGTTCGGAATTACTGGGCGTAAAGCGCGCGTAGGCGGCTTTGTAAGTTAGAGGTGAAAGCCCGGAGCTCAACTTCGGAATTGCCTTTAAGACTGCATCGCTTGAATCATGGAGAGGTCAGTGGAATTCCGAGTGTAGAGGTGAAATTCGTAGATATTCGGAAGAACACCAGTGGCGAAGGCGACTGACTGGACATGTATTGACGCTGAGGTG
ASV_220	0	0	0	13	0	0	0	462	0	0	0	20	0	161	0	0	0	0	0	0	0	Bacteria	Acidobacteriota	Acidobacteriae	Acidobacteriales	Acidobacteriaceae (Subgroup 1)	Acidipila-Silvibacterium	NA	CGTTGTTCGGAATTATTGGGCGTAAAGGGTGCGTAGGCGGTCTCGTAAGTCTTGTGTGAAATCTTCGGGCTCAACTCGAAGTCTGCACGAGAAACTGCGAGGCTTGAGTGTGGGAGAGGTGAGTGGAATTTCCGGTGTAGCGGTGAAATGCGTAGATATCGGAAGGAACACCTGTGGCGAAAGCGGCTCACTGGACCACAACTGACGCTGAGGCA
ASV_221	0	0	0	0	30	0	0	0	186	0	12	0	15	0	42	64	56	235	0	0	11	Bacteria	Planctomycetota	Planctomycetes	Gemmatales	Gemmataceae	NA	NA	CGTTGTTCGGATTCACTGGGCTTAAAGGGCGCGTAGGCGGGCGGCGAGGTCGGTGGTGAAATCCCCCAGCTCAACTGGGGAAGTGCCTTCGATACCGGCCGTCTCGAGGGGGGTAGGGGCGCGTGGAACTTCCGGTGGAGCGGTGAAATGCGTAGATATCGGAAGGAACGCCGGTGGCGAAAGCGACGCGCTGGGCCCCATTCTGACGCTGAGGC
ASV_222	0	0	5	0	38	4	0	0	6	0	26	0	7	0	14	120	231	189	0	0	5	Bacteria	Planctomycetota	Planctomycetes	Gemmatales	Gemmataceae	Fimbriiglobus	NA	CGTTGTTCGGAATCACTGGGCTTAAAGGGCGCGTAGGCGGGCTATCAAGTCCGGGGTGAAATCCTCCCGCTCAACGGGAGAACGGCCTCGGATACTGATGGTCTCGAGGGGGATAGGGGCACGCGGAACTGTGGGTGGAGCGGTGAAATGCGTTGATATCCATAGGAACTCCGGTGGCGAAAGCGGCGTGCTGGATCCCTTCTGACGCTGAGGCG
ASV_223	0	0	0	0	52	0	0	0	0	0	0	0	0	0	0	41	454	92	0	0	0	Bacteria	Planctomycetota	Planctomycetes	Isosphaerales	Isosphaeraceae	Singulisphaera	NA	CGTTATTCGGAATCACTGGGCTTAAAGCGCGTGTAGGCGGGAGGGCACGTCGGCCGCTGAAATCCCCCGGCTCAACCGGGGAACGGGCGCCGATACGACCGTCCTGGAGGGACGTAGGGGGACCTGGAACTTCCGGTGGAGCGGTGAAATGCGTTGAGATCGGAAGGAACGCCCGTGGCGAAAGCGAGGTCCTGGACGTTTTCTGACGCTGAGAC
ASV_224	110	518	0	0	0	0	0	0	0	0	0	0	0	0	0	0	0	0	0	0	0	Archaea	Crenarchaeota	Nitrososphaeria	SCGC AB-179-E04	NA	NA	NA	TACCAGCTCCCCGAGTGGTCGGGACGATTATTGGGCCTAAAGCATCCGTAGCCGGCTTCACAGGTCTCTTGTTAAATCCAACGGCTCAACCGTTGGACCGCAGGAGATACCATGGAGCTAGGGGGCGGGAGAGGCGGACGGTACTCCATGGGTAGGGGTAAAATCCTTTGATCCATGGAAGACCACCAGTGGCGAAGGCGGTCCGCTAGAACGCGCCCGACGGTGAGGGATGAAAGCTGGGGGAGC
ASV_225	0	0	0	0	12	0	0	0	0	308	83	0	197	0	0	0	27	0	0	0	0	Bacteria	Armatimonadota	NA	NA	NA	NA	NA	CGTTGTCCGGATTTACTGGGCGTAAAGCGCGTGTAGGTGGCGGCTTAAGTCGGGTGTGAAAGCCCGGGGCTCAACCCCGGGATGCCGCCCGAGACTGGGCCGCTTGAGGACGGAAGAGGGGAGTGGAATTCCTGGTGTAGCGGTGAAATGCGTAGAGATCAGGAGGAACACCCGTGGCGAAGGCGGCTCCCTGGTCCGTCCCTGACGCTGAGACG
ASV_226	0	0	0	0	247	0	20	0	70	115	29	0	0	0	30	89	0	0	18	0	8	Bacteria	Myxococcota	Polyangia	Haliangiales	Haliangiaceae	Haliangium	NA	CGTTGCTCGGAATCATTGGGCGTAAAGCGCACGTAGGCGGCCTGTTAAGTCGGGTGTGAAAGCCCTGGGCTCAACCCAGGAAGTGCACTCGAAACTGGCGGGCTTGAATATGGAAGAGGGTCGCGGAATTCCCGGTGTAGAGGTGAAATTCGTAGATATCGGGAGGAACACCAGTGGCGAAGGCGGCGACCTGGGCCAATATTGACGCTGAGGTG
ASV_227	0	0	0	0	109	0	0	0	0	0	5	0	179	0	4	152	0	177	0	0	0	Bacteria	NA	NA	NA	NA	NA	NA	CGTTATCCGGATTTACTGGGCGTAAAGAGCGCGTAGGCGGTCCCTTAAGTTGGTTGTGAAAGTTCGTGGCTCAACCACGAAATTGCGTCCAATACTGAGGGGCTAGAGTGCAGCAGAGGAAAGTGGAATTCCCGGTGTAGTAGTGAAATGCGTAGATATCGGGAGGAACACCAGTGGCGAAGGCGGCTTTCTGGGCTGCAACTGACGCTGAGGCG
ASV_228	0	0	17	342	0	0	71	94	0	0	0	4	0	97	0	0	0	0	0	0	0	Bacteria	WPS-2	NA	NA	NA	NA	NA	CGTTGTCCGGAATTATTGGGCGTAAAGCGCTCGTAGGTGGATTGACAAGTCTGCAAGCAAAGCCCCGGGCTCAACTCGGGAATCCGTGTGGAAACTGTCGATCTAGAGGTAGTCAGAGGATGATGGAATTCCCGGTGTAGCGGTGAAATGCGTAGATATCGGGAGGAACACCAGTGGCGAAGGCGATCATCTGGGGCTAACCTGACACTGAGGAG
ASV_229	0	0	0	0	114	0	0	0	0	105	312	0	24	0	0	0	0	61	0	0	0	Bacteria	Proteobacteria	Alphaproteobacteria	Caulobacterales	Caulobacteraceae	Phenylobacterium	NA	CGTTGCTCGGAATTACTGGGCGTAAAGGGCGCGTAGGCGGATGTTTAAGTCAGAGGTGAAAGCCCAGGGCTCAACCTTGGAACTGCCTTTGATACTGGACATCTTGAGTACGGGAGAGGTGAGTGGAACTCCGAGTGTAGAGGTGAAATTCGTAGATATTCGGAAGAACACCAGTGGCGAAGGCGACTCACTGGCCCGTTACTGACGCTGAGGCG
ASV_230	0	609	0	0	0	0	0	0	0	0	0	0	0	0	0	0	0	0	0	0	0	Bacteria	Planctomycetota	Planctomycetes	Gemmatales	Gemmataceae	NA	NA	GACGAACCGTGCAAACGTTGTTCGGATTCACTGGGCTTAAAGGGCGCGTAGGCGGCTCGCCAAGTCAGGGGTGAAATCTTTCGGCTTAACCGGAAAACAGCTTCTGATACTGGCGGGCTAGAGGGAGGTAGGGGCATGTGGAACTTCCGGTGGAGCGGTGAAATGCGTAGATATCGGAAGGAACGCCGGTGGCGAAAGCGACGTGCTGGACCTCTTCTGACGCTGAGGCGCGAAAGCTAGGGGAGC
ASV_231	0	0	302	0	0	136	169	0	0	0	0	0	0	0	0	0	0	0	0	0	0	Bacteria	Chloroflexi	KD4-96	NA	NA	NA	NA	CGTTGTCCGGATTTACTGGGCGTAAAGAGCGCGCAGGCGGTCGGCCAAGTCGAGTGTGAAAGCCCCCGGCTCAACTGGGGAGGGTCACTCGATACTGGTCGACTCGAAGGCGGGAGAGGGAAGCGGAATTCCCGGTGTAGCGGTGGAATGCGTAGATATCGGGAGGAACACCAGTGGCGAAGGCGGCTTCCTGGCCCGTTCTTGACGCTGAGGCG
ASV_233	0	0	3	133	0	0	62	142	23	0	0	92	0	127	7	4	0	0	0	0	9	Bacteria	WPS-2	NA	NA	NA	NA	NA	CGTTGTCCGGAATCATTGGGCGTAAAGCGCTCGTAGGCGGATCTTTAAGTCTGTGAAGAAAGACCTGGGCTCAACTCAGGGAACGGCATGGAGACTATTGATCTTGAGGTAGTTAGAGGATGATGGAATTCCCGGTGTAGCGGTGAAATGCGTAGATATCGGGAGGAACACCAGTGGCGAAGGCGATCATCTGGGACTAACCTGACGCTGAGGAG
ASV_234	0	0	395	103	0	95	0	0	0	0	0	0	0	0	0	0	0	0	0	0	0	Archaea	Crenarchaeota	Nitrososphaeria	Nitrososphaerales	Nitrososphaeraceae	Candidatus Nitrososphaera	NA	TGGTCGGGACGATTATTGGGCCTAAAGCATCCGTAGCCGGTTCTGCAAGTCTTCCGTTAAATCCACCTGCTCAACAGATGGGCTGCGGGAGATACTACAGGGCTAGGAGGCGGGAGAGGCAAGCGGTACTCAGTGGGTAGGGGTAAAATCCTCTGATCCACTGAAGACCACCGGTGGCGAAGGCGGCTTGCCAGAACGCGCTCGACGGTGAGGGA
ASV_235	0	0	0	24	0	0	0	400	0	0	0	0	0	164	0	0	0	0	0	0	0	Bacteria	Chloroflexi	Chloroflexia	Elev-1554	NA	NA	NA	CGTTGTCCGGATTTATTGGGCGTAAAGGGCGCGTAGGCGGCCTGGCGCATCCGGCGTGAAATCTCCCCGCTCAACGGGGAGGGGTCGGCGGAGATGGCCGGGCTTGAGGGCGGTAGAGGCAGATGGAAGTCCCGAAGTAGTGGTGAAATGCGTAGAGATCGGGAGGAACACCAGAGGCGAAGGCGATCTGCTGGGCCGACCCTGACGCTGAGGCG
ASV_236	0	0	0	0	89	0	0	0	0	0	0	0	52	0	0	0	220	160	0	0	61	Bacteria	Proteobacteria	Gammaproteobacteria	WD260	NA	NA	NA	CGTTAATCGGAATTACTGGGCGTAAAGCGCGCGTAGACGGTTTTGTAAGTCAGATGTGAAATCCCTGGGCTCAACCTGGGAACTGCATTTGAGACTGCATGGCTAGAGTATGGAAGAGGGAAGTGGAATTTCCGGTGTAGCGGTGAAATGCGTAGATATCGGAAGGAACACCAGTGGCGAAAGCGACTTCCTGGTCCAATACTGACGTTCATGTG
ASV_238	0	0	0	0	0	0	0	0	9	0	0	0	0	0	0	0	0	0	0	533	34	Bacteria	Chloroflexi	NA	NA	NA	NA	NA	CGTTGTCCGGATTTACTGGGCGTAAAGGGCGTGTAGGCGGCGCGCTTGGTTGCCGGTGAAAGCCCCCGGCTCAACCGGGGAGGGTCCGGCAAGACGGGCGCGCTCGAGGCCGGCAGAGGCAGGTGGAATTCCCGGTGGAGCGGTGAAATGCGTAGAGATCGGGAGGAACACCGGTGGCGAAGGCGGCCTGCTGGGCCGGGCCTGACGCTGAGGCG
ASV_239	0	0	0	0	0	0	0	0	346	0	0	0	0	0	0	0	128	0	0	0	96	Bacteria	Chloroflexi	Ktedonobacteria	Ktedonobacterales	Ktedonobacteraceae	1921-2	NA	CGTTGTCCGGAGTTACTGGGCGTAAAGGGCACGCAGGCGGTCTGCGACGTTGCCATGACAGGGTCGGGCTTCACTCGACCAGGAGGGCAAAAACGAGCGGACTTGAGGCTTGGAGAGGGACCTGGAATTCCGGGTGGAGTGGTGAAATGCGTAGAGATCCGGAGGAACACCGAAGGCGAAGGCAGGGTCCTGGCCAAGAACTGACGCTGAGGTGC
ASV_240	0	0	17	110	0	92	88	51	0	0	0	55	0	156	0	0	0	0	0	0	0	Bacteria	Proteobacteria	Gammaproteobacteria	Xanthomonadales	Rhodanobacteraceae	Mizugakiibacter	NA	CGTTAATCGGAATTACTGGGCGTAAAGCGTGCGTAGGTGGTTCGTTAAGTCCGTTGTGAAAGCCCCGAGCTCAACTTGGGAATTGCAGTGGATACTGATGAGCTGGAGTGCGGTAGAGGAAGGTGGAATTCCCGGTGTAGCGGTGAAATGCGTAGAGATCGGGAGGAACACCAGTGGCGAAGGCGGCCTTCTGGACCAGCACTGACACTCAACAC
ASV_241	0	0	0	0	137	0	0	0	123	30	71	0	30	0	33	52	0	77	0	0	9	Bacteria	Planctomycetota	Planctomycetes	Gemmatales	Gemmataceae	NA	NA	CGTTGTTCGGAATCACTGGGCTTAAAGGGCGCGTAGGCGGACCGTTTAGTCCGGGGTGAAAGCCCCCAGCTCAACTGGGGAATAGCCTCGGATACTGGCGGTCTCGAGGGAGGTAGGGGCAGCTGGAACTTCCGGTGGAGCGGTGAAATGCGTTGATATCGGAAGGAACGCCTGTGGCGAAAGCGAGCTGCTGGGCCTTTTCTGACGCTGAGGCG
ASV_242	0	0	0	0	0	0	0	0	61	33	0	0	0	0	123	79	38	227	0	0	0	Bacteria	NA	NA	NA	NA	NA	NA	ATGTGTCAGCGCCGCGGTAATACGTAGGGGGCAAGCGTTACCCGGATTTACTGGGCGTAAAGCGCGTGTAGGTGGTTGGTTAAGCGTGATGTGAAAGCTTCCGGCTCAACCGGAAAACTGCATTGCGAACTGGCTGACTTGAGGACAGGAGAGGGAAGCGGAATTCCCGGTGTAGCGGTGAAATGCGTAGATATCGGGAGGAACACCAGAGGCGA
ASV_243	58	501	0	0	0	0	0	0	0	0	0	0	0	0	0	0	0	0	0	0	0	Bacteria	Armatimonadota	Chthonomonadetes	Chthonomonadales	Chthonomonadaceae	Chthonomonas	NA	GACGGAGGGGGCGAGCGTTGTCCGGATTTACTGGGCGTAAAGGGCGCGTAGGCGGGCTAGAGGGTCTGCTGTGAAATTTTGGGGCTCAGCCCCAAGTTGTCGGCAGAAACCGCTAGTCTTGAAGCAGCTAGGGGGAGATGGAATTACCGGTGGAGCGGTGAAATGCGTAGAGATCGGTAGGAACACCCGTGGCGAAGGCGGTCTCCTGGGGCTGTCTTGACGCTGAGGCGCGAAAGCTGGGGGAGC
ASV_244	0	0	46	0	0	162	58	0	20	0	0	116	0	95	26	0	0	0	20	15	0	Bacteria	Actinobacteriota	Acidimicrobiia	NA	NA	NA	NA	CGTTGTCCGGATTCATTGGGCGTAAAGAGCTCGTAGGCGGCTTGGTAAGTCGGGTGTGAAACCCCCAGGCTCAACCTGGGGCCGCCACTCGATACTGCCATGGCTAGAGTCCGGTAGGGGCCCATGGAATTCCTGGTGTAGCGGTGAAATGCGCAGATATCAGGAGGAACACCAGTGGCGAAGGCGGTGGGCTGGGCCGGTACTGACGCTGAGGA
ASV_245	557	0	0	0	0	0	0	0	0	0	0	0	0	0	0	0	0	0	0	0	0	Bacteria	Bacteroidota	Bacteroidia	Chitinophagales	Chitinophagaceae	Terrimonas	NA	TACGGAGGGTGCAAGCGTTATCCGGATTCACTGGGTTTAAAGGGTGCGTAGGTGGGTTGGTAAGTCAGTGGTGAAATCTCCAGGCTTAACTTGGAAACTGCCATTGATACTATCAGTCTTGAATACCGTGGAGGTCAGCGGAATATGTCATGTAGCGGTGAAATGCTTAGATATGACATAGAACACCAATTGCGAAGGCAGCTGGCTACACGAATATTGACACTGAGGCACGAAAGCGTGGGGATC
ASV_246	0	0	0	0	0	322	0	0	0	0	0	153	0	79	0	0	0	0	0	0	0	Bacteria	Bacteroidota	Kryptonia	Kryptoniales	BSV26	NA	NA	CGTTGTCCGGAATTACTGGGTGTAAAGGGCGTGTAGGTGGGTCTCTCAGTCGGGGGTGAAATCCTACAGCTTAACTGTAGAATTGCTTCCGATACTGGAGATCTTGAGTGCGGCAGAGGGAGATGGAATTCATGGTGTAGCGGTGAAATGTGTAGATATCATGAAGAACACCAGTAGCGAAGGCGGTCTCCTGGTCCGTAACTGACACTGAGGCG
ASV_247	0	553	0	0	0	0	0	0	0	0	0	0	0	0	0	0	0	0	0	0	0	Bacteria	Cyanobacteria	Cyanobacteriia	Cyanobacteriales	Nostocaceae	NA	NA	TACGGAGGATGCAAGCGTTATCCGGAATGATTGGGCGTAAAGCGTCCGCAGGTGGCAGTGAAAGTCTGCTGTTAAAGAGTCTGGCTCAACCAGATAAAGGCAGTGGAAACTACACAGCTAGAGTGCGTTCGGGGTAGAGGGAATTCCTGGTGGAGCGGTGAAATGCGTAGAGATCAGGAAGAACACCGGTGGCGAAGGCGCTCTACTAGGCCGCAACTGACACTGAGGGACGAAAGCTAGGGGAGC
ASV_248	0	0	0	0	260	0	0	0	0	16	19	0	221	0	0	5	0	16	0	16	0	Bacteria	Planctomycetota	Planctomycetes	Gemmatales	Gemmataceae	NA	NA	CGTTATTCGGATTCACTGGGCTTAAAGGGCGCGTAGGCGGGCATCAAAGTCAGGGGTGAAATCTTTCGGCTCAACCGGAAAAGCGCCTCTGATACTGGGTGCCTCGAGGGAGGTAGGGGCATGTGGAACTTCCGGTGGAGCGGTGAAATGCGTAGATATCGGAAGGAACGCCGGTGGCGAAAGCGACGTGCTGGACCTCTTCTGACGCTGAGGCG
ASV_249	0	0	80	0	0	97	86	0	0	0	0	289	0	0	0	0	0	0	0	0	0	Archaea	Crenarchaeota	Nitrososphaeria	SCGC AB-179-E04	NA	NA	NA	TGGTCGGGACGATTATTGGGCTTAAAGCATCCGTAGCCGGCTTCACAGGTCTCTTGTTAAATCCAACGGCTCAACCGTTGGACCGCAGGAGATACCATGGAGCTAGGGGGCGGGAGAGGCGGACGGTACTCCATGGGTAGGGGTAAAATCCTTTGATCCATGGAAGACCACCAGTGGCGAAGGCGGTCCGCTAGAACGCGCCTGACGGTGAGGGA
ASV_250	0	0	0	0	55	0	5	0	27	262	194	0	6	0	0	0	0	0	0	0	0	Bacteria	Proteobacteria	Alphaproteobacteria	Rhizobiales	Beijerinckiaceae	Methylobacterium-Methylorubrum	NA	CGTTGCTCGGAATCACTGGGCGTAAAGGGCGCGTAGGCGGCGTTTTAAGTCGGGGGTGAAAGCCTGTGGCTCAACCACAGAATGGCCTTCGATACTGGGACGCTTGAGTATGGTAGAGGTTGGTGGAACTGCGAGTGTAGAGGTGAAATTCGTAGATATTCGCAAGAACACCGGTGGCGAAGGCGGCCAACTGGACCATTACTGACGCTGAGGCG
ASV_251	0	0	0	0	0	0	0	0	485	64	0	0	0	0	0	0	0	0	0	0	0	Archaea	Crenarchaeota	Nitrososphaeria	Caldiarchaeales	Terrestrial Hot Spring Gp(THSCG)	NA	NA	TGGTCGGGACGATTATTGGGCCTAAAGCATCCGTAGCCGGTCCCGTAAGTCCCCTGTTAAATCCAACGGCTCAACCGTTGGGCTGCAGGGGATACTGCGGGACTAGGGGGCGGGAGAGGCCGCCGGTATTCCTGGGGTAGGGGTAAAATCCTCTGATCCCGGGAGGACCACCAGTGGCGAAGGCGGGCGGCCAGAACGCGCCCGACGGTGAGGGA
ASV_252	0	0	0	0	203	0	0	0	0	0	125	0	77	0	0	0	0	141	0	0	0	Bacteria	Planctomycetota	Planctomycetes	Gemmatales	Gemmataceae	Fimbriiglobus	NA	CGTTGTTCGGAATCACTGGGCTTAAAGGGCGCGTAGGCGGGCTGCAAAGTCCGGGGTGAAATCCTCCCGCTCAACGGGAGAACGGCCTCGGATACTTGCGGTCTCGAGGGGGGTAGGGGCGTGCGGAACTAAGGGTGGAGCGGTGAAATGCGTTGATATCCTTAGGAACTCCGGTGGCGAAGGCGGCACGCTGGACCTTTTCTGACGCTGAGGCG
ASV_253	0	0	0	0	24	0	0	0	74	54	159	0	8	0	52	73	0	102	0	0	0	Bacteria	Chloroflexi	Anaerolineae	SBR1031	NA	NA	NA	CGTTATCCGGATTTACTGGGCTTAAAGGGTGTGCAGGCGGGTTGGTAAGTGGTGCATGAAAGCCGCGCGCTCAACGTGCGGAGGCTGTGCCAGACTGCCAGTCTAGAGGGTGCTAGAGGGACGTGGAATTCCGGGTGTAGTGGTGAAATGCGTAGAGATCCGGAGGAACACCAGAGGCGAAGGCGACGTCCTGGGGCATACCTGACGCTCAGACA
ASV_254	0	0	0	4	22	0	432	4	0	9	32	0	0	0	0	2	40	0	0	0	0	Bacteria	Myxococcota	Myxococcia	Myxococcales	Myxococcaceae	P3OB-42	NA	CGTTGTTCGGAATCATTGGGCGTAAAGGGCGCGTAGGCGGTCCGGTAAGTCAGGTGTGAAAGCCCAGGGCTCAACCTTGGAAGTGCATTTGAAACTACCGAACTAGAATCTCGGAGAGGGTGGTGGAATTCCCAGTGTAGAGGTGAAATTCGTAGATATTGGGAGGAACACCGGTGGCGAAGGCGACCACCTGGACGAAGATTGACGCTGAGGCG
ASV_255	0	0	0	82	0	0	0	256	0	0	0	0	0	205	0	0	0	0	0	0	0	Bacteria	Proteobacteria	Gammaproteobacteria	Xanthomonadales	Rhodanobacteraceae	Rhodanobacter	NA	CGTTAATCGGAATTACTGGGCGTAAAGGGTGCGTAGGTGGTTTGTTAAGTCTGTTGTGAAATCCCCGGGCTCAACCTGGGAATGGCAATGGATACTGGCAAGCTAGAGTGTGTCAGAGGATGGTGGAATTTCCGGTGTAGCGGTGAAATGCGTAGAGATCGGAAGGAACATCAGTGGCGAAGGCGGCCATCTGGGACAACACTGACGCTCAAGCA
ASV_256	0	0	105	47	0	266	79	11	0	0	0	0	0	33	0	0	0	0	0	0	0	Bacteria	Deinococcota	Deinococci	Deinococcales	Deinococcaceae	Deinococcus	NA	CGTTACCCGGAATCACTGGGCGTAAAGGGCGTGTAGGCGGGACCATCAGTCTGGTTTTAAAGACCGGGGCTCAACCCCGGGGATGGACTGGATACTGTGGTTCTAGACGGATGGAGAGGCAACCGGAATTCCTGGTGTAGCGGTGGAATGCGTAGATACCAGGAGGAACACCAATGGCGAAGGCAGGTTGCTGGACATTTTGTGACGCTGAGGCG
ASV_257	0	0	0	0	0	0	0	461	0	0	0	0	0	78	0	0	0	0	0	0	0	Bacteria	Bacteroidota	Bacteroidia	Chitinophagales	Chitinophagaceae	NA	NA	CGTTATCCGGATTCACTGGGTTTAAAGGGTGCGTAGGCGGGCAGGTAAGTCAGTGGTGAAATCTCCGGGCTTAACCCGGAAACTGCCGTTGATACTATTTGTCTTGAATGTTGTGGAGGTAAGCGGAATATGTCATGTAGCGGTGAAATGCTTAGATATGACATAGAACACCAATTGCGAAGGCAGCTTACTACACAACGATTGACGCTGAGGCA
ASV_258	0	0	0	7	18	17	0	0	100	0	55	0	12	6	37	83	49	52	0	0	101	Bacteria	Myxococcota	Polyangia	Polyangiales	Polyangiaceae	Pajaroellobacter	NA	CGTTGCTCGGAATACTGGGCGTAAAGCGTGTGTAGGCGGCCACGCAAGTCGGATGTGAAAGCCCTGGGCTCAACCCAGGAAGTGCACCCGATACTGCATGGCTCGAGTACCGGAGAGGTTGGTGGAATTCTCGGTGTAGAGGTGAAATTCGTAGATATCGAGAGGAACACCGGTGGCGAAGGCGGCCAACTGGACGAGTACTGACGCTGAGACAC
ASV_259	0	0	105	44	0	8	0	29	0	4	0	181	0	164	0	0	0	0	0	0	0	Bacteria	Actinobacteriota	Acidimicrobiia	IMCC26256	NA	NA	NA	CGTTGTCCGGATTCATTGGGCGTAAAGAGCTCGTAGGCGGCTCAGTAAGTCAGGTGTGAAATCCTCAGGCTCAACCTGGGGTCGCCATCTGATACTGCTGTGGCTAGAGCCCGGTAGGGGTCCGTGGAATTCCTGGTGTAGCGGTGAAATGCGCAGATATCAGGAGGAACACCGGTGGCGAAGGCGGCGGACTGGGCCGGAGCTGACGCTGAGGA
ASV_260	0	0	0	347	0	0	0	52	0	0	0	93	0	41	0	0	0	0	0	0	0	Bacteria	Proteobacteria	Gammaproteobacteria	Xanthomonadales	Rhodanobacteraceae	Mizugakiibacter	NA	CGTTAATCGGAATTACTGGGCGTAAAGCGTGCGTAGGTGGTTCGTTAAGTCCGTTGTGAAAGCCCCGAGCTCAACTCGGGAATTGCAGTGGATACTGATGAGCTGGAGTGCGGTAGAGGAAGGCGGAATTCCCGGTGTAGCGGTGAAATGCGTAGAGATCGGGAGGAACACCAGTGGCGAAGGCGGCCTTCTGGACCAGCACTGACACTCAAGCA
ASV_261	46	484	0	0	0	0	0	0	0	0	0	0	0	0	0	0	0	0	0	0	0	Bacteria	GAL15	NA	NA	NA	NA	NA	GACGTAGGGGGCGAGCGTTGTCCGGAATCACTGGGCGTAAAGCGCGTGTAGGCGGTTCGGTAAGTCCCGTGTGAAAGCCTACGGCTCAACTGTAGGAGGCCGCGGGATACTGCCGGGCTGGAGGACGGGAGAGGGAAGTGGAATTCCCGGTGTAGCGGTGAAATGCGTAGATATCGGGAGGAACGCCAGTGGCGAAGGCGGCTTCCTGGCCCGTTCCTGACGCTGAGACGCGAAAGCTGGGGGAGC
ASV_262	0	0	0	0	0	0	0	0	0	0	0	0	529	0	0	0	0	0	0	0	0	Bacteria	Proteobacteria	Alphaproteobacteria	Rhizobiales	Beijerinckiaceae	Methylocapsa	NA	CGTTGTTCGGAATTACTGGGCGTAAAGCGCACGTAGGCGGATCCTTAAGTCAGGGGTGAAATCCCGAGGCTCAACCTCGGAACTGCCTTTGATACTGGGGATATCGAGTCCGGGAGAGGTGAGTGGAACTGCGAGTGTAGAGGTGAAATTCGTAGATATTCGCAAGAACACCAGTGGCGAAGGCGGCTCACTGGCCCGGTACTGACGCTGAGGTG
ASV_263	0	0	0	69	0	0	0	263	0	0	0	0	0	194	0	0	0	0	0	0	0	Bacteria	Acidobacteriota	Acidobacteriae	Acidobacteriales	Acidobacteriaceae (Subgroup 1)	NA	NA	CGTTGTTCGGAATTATTGGGCGTAAAGGGTGCGTAGGCGGTTCGGCAAGTCTTGTGTGAAATCTTCAGGCTCAACCTGAAGTCTGCACGAGAAACTGCCGGGCTTGAGTGTGGGAGAGGTGAGTGGAATTCCCGGTGTAGCGGTGAAATGCGTAGATATCGGGAGGAACACCTGTGGCGAAAGCGGCTCACTGGACCACTACTGACGCTGAGGCA
ASV_264	0	0	0	76	0	0	40	362	0	0	0	0	0	47	0	0	0	0	0	0	0	Bacteria	Proteobacteria	Gammaproteobacteria	Xanthomonadales	Rhodanobacteraceae	Rhodanobacter	NA	CGTTAATCGGAATTACTGGGCGTAAAGGGTGCGTAGGCGGTTTGTTAAGTCTGTCGTGAAATCCCCGGGCTCAACCTGGGAATGGCGATGGATACTGGCAAGCTAGAGTGTGTCAGAGGATGGTGGAATTTCCGGTGTAGCGGTGAAATGCGTAGAGATCGGAAGGAACATCAGTGGCGAAGGCGGCCATCTGGGACAACACTGACGCTGAAGCA
ASV_265	0	0	0	0	59	0	0	0	4	48	91	0	23	0	0	133	27	125	0	0	0	Bacteria	Myxococcota	Myxococcia	Myxococcales	Myxococcaceae	P3OB-42	NA	CGTTGCTCGGAATTATTGGGCGTAAAGCGCGTGTAGGCGGCTTGTTAAGTCGGTTGTGAAAACCCATGGCTCAACCATGGAAGTGCGTCCGAAACTGGCAAGCTTGAGTCCCGACGAGGGTGGCGGAATTCCCAGTGTAGAGGTGAAATTCGTAGATATTGGGAGGAACACCGGTGGCGAAGGCGGCCACCTGGGAGGGTACTGACGCTGAGACG
ASV_266	0	0	0	0	0	0	0	0	368	0	0	0	0	0	141	0	0	0	0	0	0	Bacteria	GAL15	NA	NA	NA	NA	NA	CGTTGTCCGGAATACTGGGCGTAAAGCGCGTGTAGGCGGCCTGGTAAGTCCCGTGTGAAAGCCTACGGCTCAACTGTAGGAGGTCGCGGGATACTGCTAGGCTTGAGGGCAGGAGAGGGAAGTAGAATTCCCGGTGTAGCGGTGAAATGCGTAGATATCGGGAGGAATGCCAGTGGCGAAGGCGGCTTCCTGGCCTGTCCCTGACGCTGAGACGC
ASV_267	0	0	0	0	96	0	0	0	18	45	37	0	30	0	0	9	124	149	0	0	0	Bacteria	Planctomycetota	Pla4 lineage	NA	NA	NA	NA	CGTTGTTCGGAATCACTGGGCATAAAGCGCGCGTAGGCGGCTAAGCAAGTCGGGTGTGAAATCCCTCGGCTCAACCGAGGAACTGCGCCCGAAACTGCTTGGCTTGAGGGCCGGAGGGGAGAGTGGAATTCCCGGTGGAGCGGTGAAATGCGTAGAGATCGGGAAGAACGCCGGCGGCGAAAGCGACTCTCTGGTCGGTACCTGACGCTGAGGCG
ASV_268	0	0	155	9	0	135	107	10	0	0	0	0	0	86	0	0	0	0	0	0	0	Bacteria	Proteobacteria	Alphaproteobacteria	Rhizobiales	Xanthobacteraceae	Pseudolabrys	NA	CGTTGCTCGGAATTACTGGGCGTAAAGCGCACGTAGGCGGCTTCTTAAGTCGGAGGTGAAATCCTGGAGCTCAACTCCAGAACTGCCTTCGATACTGGGAAGCTTGAGTTCGGGAGAGGTGAGTGGAACTGCGAGTGTAGAGGTGAAATTCGTAGATATTCGCAAGAACACCAGTGGCGAAGGCGGCTCACTGGCCCGATACTGACGCTGAGGTG
ASV_269	0	0	0	0	150	0	0	0	0	0	0	0	197	0	0	50	58	24	0	0	18	Bacteria	Proteobacteria	Alphaproteobacteria	Rhizobiales	Beijerinckiaceae	Methylocapsa	NA	CGTTGTTCGGAATTACTGGGCGTAAAGCGCACGTAGGCGGATTTTTAAGTCAGGGGTGAAATCCCGAGGCTCAACCTCGGAACTGCCTTTGATACTGGGAATCTTGAGTCCGGGAGAGGTGAGTGGAACTGCGAGTGTAGAGGTGAAATTCGTAGATATTCGCAAGAACACCAGTGGCGAAGGCGGCTCACTGGCCCGGTACTGACGCTGAGGTG
ASV_271	0	0	0	41	0	0	20	346	0	0	0	0	0	88	0	0	0	0	0	0	0	Bacteria	Acidobacteriota	Acidobacteriae	Acidobacteriales	Acidobacteriaceae (Subgroup 1)	NA	NA	CGTTGTTCGGAATTATTGGGCGTAAAGGGTGCGTAGGTGGTTCGGCAAGTCTTGTGTGAAATCTTCAGGCTCAACTTGAAGTCTGCACAAGAAACTGCCGGGCTTGAGTATGGGAGAGGTGAGTGGAATTTCCGGTGTAGCGGTGAAATGCGTAGATATCGGAAGGAACACCTGTGGCGAAAGCGGCTCACTGGACCATTACTGACACTGAGGCA
ASV_272	0	0	0	0	268	0	0	0	0	0	0	0	225	0	0	0	0	0	0	0	0	Bacteria	Chloroflexi	Ktedonobacteria	Ktedonobacterales	JG30-KF-AS9	NA	NA	CGTTGTCCGGAGTTACTGGGCGTAAAGGGTGCGCAGGCGGCCGCGCGCGTGTGCGATGAAATCTCCGCGCTCAACGCGGTAGGGGGTCGCGCAGACGGCGTGGCTTGAGGCTCGGAGAGGGGCGTGGAATTCCGGGTGGAGCGGTGAAATGCGTAGAGATCCGGAGGAACACCGACGGCGTAAGCAGCGCCCTGGACGAGTTCTGACGCTCGGGC
ASV_273	0	0	0	0	25	0	0	0	0	0	47	0	0	0	0	162	120	137	0	0	0	Bacteria	Myxococcota	Polyangia	Polyangiales	Polyangiaceae	Pajaroellobacter	NA	CGTTGTTCGGAATTACTGGGCGTAAAGCGTGTGTAGGCGGCTACGCAAGTCGGATGTGAAATCCCCGGGCTCAACCCGGGAAGTGCACCCGAAACTGCGTGGCTTGAGTACCGGAGAGGTTGGTGGAATTCTCGGTGTAGAGGTGAAATTCGTAGATATCGAGAGGAACACCGGTGGCGAAGGCGGCCAACTGGACGAGTACTGACGCTGAGACA
ASV_274	0	0	0	0	0	0	0	0	0	0	0	0	0	0	77	211	152	34	0	0	15	Bacteria	Proteobacteria	Alphaproteobacteria	Reyranellales	Reyranellaceae	Reyranella	NA	CGTTGTTCGGAATTACTGGGCGTAAAGCGCGTGTAGGCGGTTGCCCAAGTCGGGTGTGAAAGCCTTGAGCTCAACTCAAGAAATGCACTCGGTACTGGGTGACTAGAGGACCGGAGAGGATAGTGGAATTCCCAGTGTAGTGGTGAAATACGTAGAGATTGGGAAGAACACCAGTGGCGAAGGCGGCTATCTGGACGGTTTCTGACGCTAAGACG
ASV_275	0	0	0	0	89	0	0	0	18	14	211	0	0	0	0	49	0	45	0	17	45	Bacteria	Armatimonadota	Armatimonadia	Armatimonadales	NA	NA	NA	CGTTGTCCGAATTTACTGGGCGTAAAGAGCATTAAGGCGGCTCCTTAAGTGAGAGGTGAAAGGTTCAGGGCTTAACCCGAACAGTGCCTTTCATACTGGGGAGCTTGAGTATGGGAGAGGCGAGTGGAATTTCTGGTGTAGCGGTGAAATGCGTAGATATCAGAAGGAACACCCATGGCGAAGGCAGCTCGCTGGCCTATAACTGACGCTGTAGT
ASV_276	0	0	171	22	0	111	22	0	6	0	0	106	0	39	0	0	0	0	0	8	0	Bacteria	Armatimonadota	Chthonomonadetes	Chthonomonadales	NA	NA	NA	CGTTGCCCGGATTTACTGGGCGTAAAGCGCGCGTAGGCGGCTGCGTAAGTGGGGAGTTAAAGCCCTCGGCTCAACCGAGGAAATGCTCCTCAAACTGCGCGGCTTGAGTGTAGGAGAGGGGAGTGGAATTCCCGGTGTAGCGGTGAAATGCGTTGATATCGGGAGGAACACCAGTGGCGAAGGCGCTCCCTGGCCTACTACTGACGCTGAGGCGC
ASV_277	0	0	0	0	0	0	0	0	0	0	27	0	0	16	403	0	0	0	0	32	0	Bacteria	Proteobacteria	Alphaproteobacteria	Reyranellales	Reyranellaceae	Reyranella	NA	CGTTGTTCGGAATACTGGGCGTAAAGCGCGTGTAGGCGGTTGTTCAAGTCGGATGTGAAAGCCTTGAGCTCAACTCAAGAAATGCACTCGGTACTGGATGACTAGAGGACCGGAGAGGATAGTGGAATTCCCAGTGTAGTGGTGAAATACGTAGAGATTGGGAAGAACACCAGTGGCGAAGGCGGCTATCTGGACGGTTTCTGACGCTAAGACGC
ASV_278	0	0	0	0	192	0	0	0	0	0	0	0	237	0	0	0	0	48	0	0	0	Bacteria	Chloroflexi	AD3	NA	NA	NA	NA	CGTTATCCGGATTTACTGGGCGTAAAGCGCGCTAAGGCGGCCGGCTAAGTTGGTGGTGAAATTTCGGGGCTCAACCCCGAAACTGCCTCCAATACTGGTCGGCTCGAGTGCCGGAGAGGAAGGTGGAATTCCCGGTGTAGTAGTGAAATGCGTAGATATCGGGAGGAACACCAGTGGCGAAGGCGGCCTTCTGGCCGGCAACTGACGCTGTAGCG
ASV_279	0	0	0	0	55	0	0	0	18	265	33	0	82	0	0	0	24	0	0	0	0	Bacteria	Acidobacteriota	Acidobacteriae	Solibacterales	Solibacteraceae	Candidatus Solibacter	NA	CGTTGTTCGGAGTTACTGGGCGTAAAGGGTGTGTAGGCGGTCCTCTAAGTTTGGTGTGAAATCTCCCGGCTCAACCGGGAGGGTGCGCCGAAAACTGGGGGGCTAGAGTGCGGGATGGGAGAGTAGAATTCCTGGTGTAGCGGTGAAATGCGTAGATATCAGGAGGAATACCTGTGGTGTAGACGGCTCTCTGGACCGTAACTGACGCTGAGACA
ASV_280	0	0	93	14	0	246	27	0	0	0	0	2	0	94	0	0	0	0	0	0	0	Bacteria	NA	NA	NA	NA	NA	NA	CGTTGTCCGGATTTACTGGGCGTAAAGCGCGTGTAGGCGGCTTGTTAGGTCCTTTCGTGAAAGGCAGGGGCTCAACCCCTGGAGCGCGAGGGAAACCGGCGGGCTGGAGAGAGGCAGAGGAAGGTGGAACGGTCGGTGGAGCGGTGAAATGCGTAGAGATCGATCAGAACACCCATGGCGAAGGCAGCCTTCTGGGCCTCATCTGACGCTGTGAC
ASV_281	0	0	0	0	0	0	0	0	48	53	106	0	24	0	0	0	82	145	0	0	16	Bacteria	Firmicutes	NA	NA	NA	NA	NA	CGTTGTCCGGAATTATTGGGCGTAAAGAGCGAGCAGGCGGCATACCAAGTTGGACGTGAAATTTTAGGGCTTAACCCTAAAGGGTCGTCCAAAACTGGTAAGCTAGAGTGCAGGAGAGGAAAGCGGAATTCCCGGTGTAGTGGTGAAATGCGTAGATATCGGGAGGAACACCAGAGGCGAAGGCGGCTTTCTGGCCTGTAACTGACGCTGAGGCG
ASV_282	0	0	0	275	0	0	0	0	0	0	0	0	0	197	0	0	0	0	0	0	0	Archaea	Crenarchaeota	Nitrososphaeria	SCGC AB-179-E04	NA	NA	NA	TGTGTCAGCGCCGCGGTAATACCAGCTCCCCGAGTGGTCGGGACGATTATTGGGCCTAAAGCATCCGTAGCCGGCTTCACAGGTCTCTTGTTAAATCCAACGGCTCAACCGTTGGACCGCAGGAGATACCATGGAGCTAGGGGGCGGGAGAGGCGGACGGTACTCCATGGGTAGGGGTAAAATCCTTTGATCCATGGAAGACCACCAGTGGCGAA
ASV_283	0	0	0	0	96	0	0	0	0	0	0	0	376	0	0	0	0	0	0	0	0	Bacteria	Chloroflexi	Ktedonobacteria	Ktedonobacterales	Ktedonobacteraceae	JG30a-KF-32	NA	CGTTGTCCGGAGTTACTGGGCGTAAAGGGCATGTAGGCGGTCCGATCAGTTTGGGGTTACAGCTCCCGGCTTAACTGGGAGAGCGCCTCGAAGACGGTGGGACTTGAGAGCCAGAGAGGGACACAGAATTCCGGGTGTAGTGGTGAAATGCGTAGATATCCGGAGGAATACCAAAGGCGAAGGCAGTGTCCTGGCGGGTATCTGACGCTGAGGTG
ASV_284	0	0	0	61	0	0	0	167	0	0	0	0	0	241	0	0	0	0	0	0	0	Bacteria	Proteobacteria	Alphaproteobacteria	Rhizobiales	Xanthobacteraceae	Afipia	NA	CGTTGCTCGGAATCACTGGGCGTAAAGGGTGCGTAGGCGGGTCTTTAAGTCAGGGGTGAAATCCTGGAGCTCAACTCCAGAACTGCCCTTGATACTGAGGATCTTGAGTTCGGGAGAGGTGAGTGGAACTGCGAGTGTAGAGGTGAAATTCGTAGATATTCGCAAGAACACCAGTGGCGAAGGCGGCTCACTGGCCCGATACTGACGCTGAGGCA
ASV_285	0	0	0	0	0	0	0	0	16	278	17	0	0	0	18	0	61	75	0	0	0	Bacteria	GAL15	NA	NA	NA	NA	NA	CGTTGTCCGGAATTACTGGGCGTAAAGCGCGTGCAGGCGGCCTGGTCAGTCCCGTGTGAAAGCCTACGGCTCAACTGTAGGAGGCCGCGGGATACTGCCGGGCTCGAGGGCAGGAGAGGGAAGTGGAATTCCCGGTGTAGCGGTGAAATGCGTAGATATCGGGAGGAACGCCAGTGGCGAAGGCGGCTTCCTGGCCTGTCCCTGACGCTGAGACG
ASV_286	250	211	0	0	0	0	0	0	0	0	0	0	0	0	0	0	0	0	0	0	0	Bacteria	GAL15	NA	NA	NA	NA	NA	GACGTAGGGGGCGAGCGTTGTCCGGATTTACTGGGCGTAAAGCGCGTGCAGGCGGTCGGCTAAGTCCCGTGTTAAAGCCTCCGGCCCAACCGGAGAACGCCGCGGGATACTGGCGGGCTTGAGGATGGTAGAGGGCGATGGAATTCCCGGTGTAGCGGTGAAATGCGTAGATATCGGGAGGAACGCCAGTGGCGAAGGCGGTCGCCTGGGCCATTCCTGACGCTGAGACGCGAAAGCTGGGGGAGC
ASV_287	0	0	0	38	0	0	0	361	0	0	0	0	0	57	0	0	0	0	0	0	0	Bacteria	Chloroflexi	Ktedonobacteria	Ktedonobacterales	Ktedonobacteraceae	JG30a-KF-32	NA	CGTTGTCCGGAGTTACTGGGCGTAAAGCGCACGCAGGCGGTCGCGGAAGTTTGGGGTGACAGTTGTCGGCTTAACCGACAAAGTGCCTCGAGGACTCTGTGACTTGAGGGCCGAAGAGGGACATGGAACTCCAGGTGTAGTGGTGAAATGCGTAGATATCTGGAAGAACACCAAAGGCGAAGGCAGTGTCCTGGTCGGTACCTGACGCTCAGGTG
ASV_288	0	0	11	27	0	14	39	32	0	0	0	15	0	315	0	0	0	0	0	0	0	Bacteria	Proteobacteria	Alphaproteobacteria	Rhizobiales	Xanthobacteraceae	Pseudolabrys	NA	CGTTGCTCGGAATTACTGGGCGTAAAGCGCACGTAGGCGGATTGTTAAGTCGGGGGTGAAATCCCGGAGCTCAACTCCGGAACTGCCTTCGATACTGGCGATCTTGAGTCCGGGAGAGGTGAGTGGAACTGCGAGTGTAGAGGTGAAATTCGTAGATATTCGCAAGAACACCAGTGGCGAAGGCGGCTCACTGGCCCGGTACTGACGCTGAGGTG
ASV_289	0	0	384	14	0	16	26	0	0	0	0	3	0	0	0	0	0	0	0	0	0	Bacteria	Firmicutes	Bacilli	Paenibacillales	Paenibacillaceae	Ammoniphilus	NA	CGTTGTCCGGAATTATTGGGCGTAAAGCGCGCGCAGGCGGCTTATTAAGTCTGATGTGAAAGCCCACGGCTCAACCGTGGAGGGCCATTGGAAACTGGTAGGCTTGAGTGCAGGAGAGGAGAGCGGAATTCCCGGTGTAGCGGTGAAATGCGTAGATATCGGGAGGAACACCCGTGGCGAAGGCGGCTCTCTGGCCTGTAACTGACGCTGAGGCG
ASV_290	0	0	0	0	151	0	0	0	161	36	30	0	9	0	0	0	56	0	0	0	0	Bacteria	Chloroflexi	Chloroflexia	Thermomicrobiales	JG30-KF-CM45	NA	NA	CGTTGTCCGGAGTGACTGGGCGTAAAGCGCGCGCAGGCGGCTCGTGAGGCGGCACGTGAAAGCCCCGGGCTTAACTCGGGAGGGTCGTGGCGAACCAGCGAGCTTGAGGCCGGTAGAGGTGGGTGGAACTCCTGGTGGAGTGGTGAAATGCGTAGAGATCAGGAAGAACACCCGTGGCGAAGGCGGCCCACTGGGCCGGTACTGACGCTGAGGCG
ASV_291	440	0	0	0	0	0	0	0	0	0	0	0	0	0	0	0	0	0	0	0	0	Bacteria	Proteobacteria	Gammaproteobacteria	Xanthomonadales	Rhodanobacteraceae	Mizugakiibacter	NA	TACGGAGGGTGCAAGCGTTAATCGGAATTACTGGGCGTAAAGCGTGCGTAGGTGGTTCGTTAAGTCCGTTGTGAAAGCCCCGAGCTCAACTTGGGAATTGCAGTGGATACTGATGAGCTGGAGTGCGGTAGAGGAAGGTGGAATTCCCGGTGTAGCGGTGAAATGCGTAGAGATCGGGAGGAACACCAGTGGCGAAGGCGGCCTTCTGGACCAGCACTGACACTCAAGCACGAAAGCGTGGGGAGC
ASV_292	0	0	0	0	91	0	0	0	19	27	289	0	7	0	0	0	0	7	0	0	0	Bacteria	Verrucomicrobiota	Verrucomicrobiae	NA	NA	NA	NA	CGTTGTTCGGATTTATTGGGCGTAAAGGGAGCGTAGGCGGCCGCGTAAGTCAGGTGTTAAAATTCGACGCTCAACGTCGAAGCGCATTTGATACTGCGGGGCTCGAGGAGTGGAGAGGAGACAGGAATTCACGGTGTAGCAGTGAAATGCGTAGATATCGTGAGGAAGACCCATGGCGAAAGCATGTCTCTGGAAACTACCTGACGCTGATGCTC
ASV_293	0	0	11	61	0	0	6	300	0	0	0	0	0	60	0	0	0	0	0	0	0	Bacteria	Abditibacteriota	Abditibacteria	Abditibacteriales	Abditibacteriaceae	Abditibacterium	NA	CGTTGTCCGGAATTACTGGGCGTAAAGGGTGTGTAGGCGGATATTTAAGTAGAAAGTGAAAGGTTGGAGCTCAACTCCAACATTGCTTCCTATACTGGATGTCTTGAGTTTCGGAGAGGAAGATGGAACGACACGTGTAGCGGTGAAATGCGTTGATATGTGTCGGAACACCAATAGCGAAGGCAATCTTCTGGACGAATACTGACGCTGAGACA
ASV_294	0	0	0	0	213	0	0	0	35	0	35	0	49	0	11	13	24	53	0	0	0	Bacteria	Planctomycetota	Planctomycetes	Gemmatales	Gemmataceae	NA	NA	CGTTGTTCGGAATCACTGGGCTTAAAGGGCGCGTAGGCGGGCTCTCAAGTCCGGGGTGAAATCTTTCGGCTCAACCGGAAAATAGCCTTGGATACTGGGAGTCTCGAGGGAGGCAGGGGCGGGTGGAACTTCCGGTGGAGCGGTGAAATGCGTTGATATCGGAAGGAACGCCGGTGGCGAAAGCGACCCGCTGGACCTCTTCTGACGCTGAGGCG
ASV_295	0	0	0	191	0	0	0	241	0	0	0	0	0	0	0	0	0	0	0	0	0	Bacteria	Proteobacteria	Alphaproteobacteria	Holosporales	Holosporaceae	NA	NA	CGTTGTTCGGAATGACTGGGTGTAAAGGGCGCGTAGGTGGTATTTTAAGTGAGGCGTGAAAGCCCTGGGCTTAACCCAGGAGGTGCGTTTCATACTGGAATGCTAGAGTGCGAGAGAGGAAAGTGGAATTCCTAGTGTAGAGGTGAAATTCGTAGATATTAGGAAGAACACCAGAGGCGAAGGCGCTTTCTGGCTCGTAACTGACACTGAGGCGC
ASV_296	0	0	0	0	0	0	0	0	49	161	177	0	0	0	18	22	0	3	0	0	0	Bacteria	Planctomycetota	Planctomycetes	Gemmatales	Gemmataceae	NA	NA	CGTTGTTCGGAATCACTGGGCTTAAAGGGCGCGTAGGCGGGCAAGCAAGTCCGGGGTGAAATCTTTCGGCTCAACCGGAAAAGTGCCTTGGATACTGCTTGTCTTGAGGGAGGTAGGGGCATGCGGAACTTCCGGTGGAGCGGTGAAATGCGTTGATATCGGAAGGAACGCCGGTGGCGAAAGCGGCGTGCTAGACCTCTTCTGACGCTGAGGCG
ASV_297	0	0	0	0	154	0	0	0	82	20	108	0	0	0	0	0	0	64	0	0	0	Bacteria	Proteobacteria	Alphaproteobacteria	Rhizobiales	Xanthobacteraceae	NA	NA	CGTTGCTCGGAATCACTGGGCGTAAAGGGTGCGTAGGCGGGTCTTTAAGTCAGGGGTGAAATCCTGGAGCTCAACTCCAGAACTGCCTTTGATACTGAGGATCTTGAGTTCGGGAGAGGTGAGTGGAACTGCGAGTGTAGAGGTGAAATTCGTAGATATTCGCAAGAACACCAGTGGCGAAGGCGGCTCACTGGCCCGATACTGACGCTGAGGCA
ASV_299	0	0	0	0	19	0	0	0	0	0	11	0	5	0	0	21	73	298	0	0	0	Bacteria	Proteobacteria	Alphaproteobacteria	Rhizobiales	Rhizobiales Incertae Sedis	Bauldia	NA	CGTTGTTCGGAATTACTGGGCGTAAAGCGTATGTAGGCGGATCGTTAAGTCGGGGGTGAAATCCCGAGGCTCAACCTCGGAACTGCCTCCGATACTGGCGATCTTCGAGTCCGGGAGAGGTGAGTGGAACTCCGAGTGTAGAGGTGAAATTCGTAGATATTCGGAAGAACACCAGTGGCGAAGGCGGCTCACTGGCCCGGTACTGACGCTGAAAT
ASV_300	0	0	13	86	0	0	38	93	0	0	0	44	0	132	0	0	0	0	12	0	0	Bacteria	Actinobacteriota	Thermoleophilia	Solirubrobacterales	Solirubrobacteraceae	Conexibacter	NA	CGTTGTCCGGAATCATTGGGCGTAAAGAGCGTGTAGGTGGCTCGGTAAGTCCGCTGTAAAAGTCCAGGGCTCAACCCTGGAAAGCCGGTGGAAACTGTCGAGCTAGAGTCCGGAAGAGGCGAGTGGAATTCCTGGTGTAGCGGTGAAATGCGCAGATATCAGGAGGAACACCAATGGCGAAGGCAGCTCGCTGGGACGGTACTGACACTGAGACG
ASV_301	0	0	0	0	0	0	363	42	0	0	0	11	0	0	0	0	0	0	0	0	0	Bacteria	Proteobacteria	NA	NA	NA	NA	NA	GCGTTATTCGTCATGATTGGGCGTAAAGCGCATGTAGGTGGTTTTGAGCCGCCGCGCATGCAAATCCCTAGGCTCACCTTAGGTATCATGTGCAGGTGGTAAAAACTAGAGTAAGTGAAAGGAGAGTAGAATTCCTGGTGGAGAGGTGGAATTTTCAGATACCAGGAGGAATTTCGAAAGCGAAGGCAGCTCTCTAGCACTTGACTGACGCTGAG
ASV_302	0	0	0	0	0	0	0	0	0	0	0	0	0	0	271	81	8	0	0	0	56	Bacteria	Proteobacteria	Gammaproteobacteria	NA	NA	NA	NA	CGTTAATCGGAATTACTGGGCGTAAAGCGCACGTAGATGGCTTCGTAAGTCGGATGTGAAATCCCCGGGCTTAACCTGGGAACTGCATTCGAAACTGCGTTGCTCGAGTGTGGAAGAGGGAAGCGGAATTCCAGGTGTAGCGGTGAAATGCGTAGATATCTGGAGGAACATCAGTGGCGAAAGCGGCTTCCTGGTCCAACACTGACATTCAGGTG
ASV_303	0	415	0	0	0	0	0	0	0	0	0	0	0	0	0	0	0	0	0	0	0	Bacteria	Chloroflexi	Anaerolineae	SBR1031	A4b	NA	NA	AACGTAGGAGGCGAGCGTTATCCGGAATTACTGGGCGTAAAGGGTGTGCAGGCGGGTCGTTAAGTGGTGCATGAAAGCCCTACGCTCAACGTAGGGAGGCTGTGCCAGACTGGCGGTCTGGAGTGCGCGAGAGGGCTGTGGAATTCCGGGTGTAGTGGTGAAATGCGTAGAGATCCGGAGGAACACCAGAGGCGAAGGCGGCAGCCTGGCGCGCAACTGACGCTGAGACACGACAGCATGGGGAGC
ASV_304	0	0	0	0	0	0	21	117	0	0	0	0	0	273	0	0	0	0	0	0	0	Bacteria	Proteobacteria	Alphaproteobacteria	Acetobacterales	Acetobacteraceae	NA	NA	CGTTGCTCGGAATGACTGGGCGTAAAGGGCGCGTAGGCGGTTTATGCAGTCAGGCGTGAAATTCCTGGGCTCAACCTGGGGGCTGCGCTTGAGACGCATGGACTGGAGTGGGGAAGAGGGTCGTGGAATTCCCAGTGTAGAGGTGAAATTCGTAGATATTGGGAAGAACACCGGTGGCGAAGGCGGCGACCTGGTCCTTGACTGACGCTGAGGCG
ASV_305	0	408	0	0	0	0	0	0	0	0	0	0	0	0	0	0	0	0	0	0	0	Bacteria	WPS-2	NA	NA	NA	NA	NA	GACGTAGGGGGCGAGCGTTATTCGGAATCATTGGGCGTAAAGCGCTCGTAGGCGGATCAGCAAGTCGGTGAAGAAAGACCCGGGCTCAACTCGGGGAACGGCACCGATACTGTTGGTCTTGAGGCAATCAGAGGGTAATGGAATTCCCGGTGTAGCGGTGAAATGCGTAGATATCGGGAGGAACACCAGTGGCGAAGGCGATTACCTGGGGTTGATCTGACGCTGAGGAGCGAAAGCTAGGGGAGC
ASV_306	0	405	0	0	0	0	0	0	0	0	0	0	0	0	0	0	0	0	0	0	0	Bacteria	Cyanobacteria	Cyanobacteriia	Cyanobacteriales	Nostocaceae	NA	NA	TACGGAGGATGCAAGCGTTATCCGGAATGATTGGGCGTAAAGCGTCCGCAGGTGGCAGTGAAAGTCTGCTGTTAAAGAGTCTGGCTCAACCAGATAAAGGCAGTGGAAACTACACAGCTAGAGTGCGTTCGGGGTAGAGGGAATTCCTGGTGTAGCGGTGAAATGCGTAGAGATCAGGAAGAACACCGGTGGCGAAGGCGCTCTACTAGGCCGCAACTGACACTGAGGGACGAAAGCTAGGGGAGC
ASV_307	0	0	187	0	0	190	7	0	0	0	0	0	0	3	0	0	0	0	0	0	16	Bacteria	Armatimonadota	Fimbriimonadia	Fimbriimonadales	Fimbriimonadaceae	NA	NA	CGTTGTCCGGATTTACTGGGCGTAAAGAGTGCGTAGGCGGCTTGTTAAGTGTAGAGTGAAATCTCCAGGGCTCAACCCGGAAACTGCTCTGCATACTGGCAAGCTCGAGGGTCACAGAGGCAACTGGAATTCCTGGTGGAGCGGTGAAATGCGTAGATATCAGGAGGAACTCCCATGGCGAAGGCAGGTTGCTGGGTGACATCTGACGCTGAGGC
ASV_308	0	0	2	25	27	0	0	89	45	21	0	0	0	40	3	27	41	82	0	0	0	Bacteria	RCP2-54	NA	NA	NA	NA	NA	CGTTGTTCGGATTGACTGGGCGTAAAGGGCGTGTAGGCGGTCGGCCAAGTCTGATGTGAAAGCCCGGAGCTCAGCTCCGGAAGTGCGTCGGAAACTAACCGGCTGGAGCGCGGTAGAGGAGGGTGGAATTCCTGGTGTAGCGGTGAAATGCGTAGATATCAGGAGGAACACCGGCGGCGAAGGCGGCCCTCTGGACCGTTGCTGACGCTGAGACG
ASV_309	0	0	0	0	12	0	0	0	59	11	46	0	14	0	47	118	22	60	0	7	6	Bacteria	Myxococcota	Polyangia	Haliangiales	Haliangiaceae	Haliangium	NA	CGTTGCTCGGAATCATTGGGCGTAAAGCGCACGTAGGCGGCGCGTTAAGTCGGATGTGAAAGCCCCAGGCTCAACCTGGGAAGTGCATACGAAACTGGCGCGCTTGAGTATGGAAGAGGGTCGCGGAATTCCCGGTGTAGAGGTGAAATTCGTAGATATCGGGAGGAACACCAGTGGCGAAGGCGGCGACCTGGGCCAATACTGACGCTGAGGTG
ASV_310	0	0	11	19	0	0	71	5	91	30	0	70	0	104	0	0	0	0	0	0	0	Bacteria	Actinobacteriota	Acidimicrobiia	NA	NA	NA	NA	CGTTGTCCGGATTCATTGGGCGTAAAGGGCTCGTAGGCGGCTTGGCAAGTCGGGTGTTAAAACTTCAGGCTCAACCTGGAGACGCCACCCGATACTGCCATGGCTAGAGTCCGGTAGGGGACCACGGAATTCCTGGTGTAGCGGTGAAATGCGCAGATATCAGGAGGAACACCGGTGGCGAAGGCGGTGGTCTGGGCCGGTACTGACGCTGAGGA
ASV_311	0	0	0	0	82	0	59	0	18	122	82	0	14	0	0	5	0	16	0	0	0	Bacteria	Actinobacteriota	Actinobacteria	Frankiales	Frankiaceae	Jatrophihabitans	NA	CGTTGTCCGGAATTATTGGGCGTAAAGAGCTCGTAGGCGGTTTGTCGCGTCGGCTGTGAAAACCTGGGGCTCAACCCCGGGCCTGCAGCCGATACGGGCAGACTTGAATTCGGCAGGGGAGACTGGAATTCCTGGTGTAGCGGTGAAATGCGCAGATATCAGGAGGAACACCGGTGGCGAAGGCGGGTCTCTGGGCCGATATTGACGCTGAGGAG
ASV_312	0	0	0	0	48	0	0	0	0	0	10	0	17	0	0	45	11	265	0	0	0	Bacteria	Myxococcota	Myxococcia	Myxococcales	Myxococcaceae	NA	NA	CGTTGTTCGGAATTATTGGGCGTAAAGCGCGTGTAGGCGGCTGGGCAAGTCGGGTGTGAAAGCCCTCGGCTTAACCGAGGAAGTGCACTCGAAACTGCCTGGCTCGAGTACCGGAGAGGATGGCGGAATTCCCCAAGTAGAGGTGAAATTCGTAGATATGGGGAGGAACACCGGTGGCGAAGGCGCATCTGGCCGGATACTGACGCTGAGACGCG
ASV_313	0	0	0	0	0	0	0	0	0	0	0	0	396	0	0	0	0	0	0	0	0	Bacteria	Proteobacteria	Alphaproteobacteria	Rhizobiales	Beijerinckiaceae	Methylocapsa	NA	CGTTGTTCGAAATTACTGGGCGTAAAGCGCACGTAGGCGGATCTTTAAGTCAGGGGTGAAATCCCGAGGCTCAACCTCGGAACTGCCTTTGATACTGGGGATATCGAGTCCGGGAGAGGTGAGTGGAACTGCGAGTGTAGAGGTGAAATTCGTAGATATTCGCAAGAACACCAGTGGCGAAGGCGGCTCACTGGCCCGGTACTGACGCTGAGGTG
ASV_314	390	0	0	0	0	0	0	0	0	0	0	0	0	0	0	0	0	0	0	0	0	Bacteria	Actinobacteriota	Thermoleophilia	Gaiellales	NA	NA	NA	TACGTAGGGGGCTAGCGTTGTCCGGATTCATTGGGCGTAAAGCGCGTGTAGGCGGCCAGGTAGGTCCGCTGTGAAAACTCGAGGCTCAACCTCGAGACGTCGGCGGAAACCACTTGGCTAGAGTCCGGAAGAGGAGAGTGGAATTCCCGGTGTAGCGGTGAAATGCGCAGATATCGGGAAGAACACCCGTGGCGAAGGCGGCTCTCTGGGACGGTACTGACGCTGAGACGCGAAAGCGTGGGGAGC
ASV_315	0	0	0	0	0	30	87	0	35	0	0	0	0	0	80	0	0	0	80	24	49	Bacteria	Chloroflexi	SHA-26	NA	NA	NA	NA	CGTTGTCCGGATTTACTGGGCGTAAAGAGCGCGTAGGCGGCTCGGCAGGTTGGGTGTGAAAGGCGCGGGCTTAACCCGCGGAGGTCATCCAAAACGGTCGGGCTGCGAGGGCAGTAGAGGAAGGTGGAATTCCGGGTGTAGTGGTGAAATGCGTAGAGATCCGGAGGAACACCGGTGGCGAAGGCGGCCTTCTGGGCTGGCCCTGACGCTGAGGC
ASV_316	0	0	0	80	0	0	0	56	0	0	0	20	0	228	0	0	0	0	0	0	0	Bacteria	Acidobacteriota	Acidobacteriae	Acidobacteriales	Acidobacteriaceae (Subgroup 1)	Acidipila-Silvibacterium	NA	CGTTGTTCGGAATTATTGGGCGTAAAGGGTGCGTAGGCGGTTCGGTAAGTTTCGTGTGAAATCTTCGGGCTCAACTCGAAGCCTGCACGAGATACTGCCGGGCTTGAGTGTGGGAGAGGTGAGTGGAATTTCCGGTGTAGCGGTGAAATGCGTAGATATCGGAAGGAACACCTGTGGCGAAAGCGGCTCACTGGACCATAACTGACGTTGAGGCA
ASV_317	0	0	108	0	0	97	0	0	0	0	0	0	0	24	0	0	0	0	0	13	141	Bacteria	Planctomycetota	Planctomycetes	Isosphaerales	Isosphaeraceae	NA	NA	CGTTATTCGGAATCACTGGGCTTAAAGCGCGTGTAGGCGGGACGACGCGTCGGTCGCTGAAATCCCCCGGCTTAACCGGGGAACGGGCGCCGATACGGTCGGCCTCGAGGGACGTAGGGGGACCTGGAACTTCCGGTGGAGCGGTGAAATGCGTTGAGATCGGAAGGAACGCCCGTGGCGAAAGCGAGGTCCTGGACGTTTTCTGACGCTGAGAC
ASV_318	0	0	0	0	0	10	10	0	63	5	0	0	0	0	61	36	14	0	16	59	106	Bacteria	Planctomycetota	Planctomycetes	Gemmatales	Gemmataceae	NA	NA	CGTTGTTCGGAATCACTGGGCTTAAAGGGCGCGTAGGCGGGAAACCAAGTCCGGGGTGAAATCTTTCGGCCCAACCGGAAAACGGCCTTGGATACTGGTTTCCTCGAGCGAGGTAGGGGCAGCTGGAACTTCCGGTGGAGCGGTGAAATGCGTTGATATCGGAAGGAACGCCGGTGGCGAAAGCGAGCTGCTGGACCTCTCCTGACGCTGAGGCG
ASV_319	0	0	0	0	21	0	0	0	0	0	0	0	0	0	0	6	62	265	0	0	24	Bacteria	Chloroflexi	Anaerolineae	SBR1031	NA	NA	NA	CGTTATCCGGATTTACTGGGCGTAAAGCGTGTGCAGATGGGCGAGTAAGTGGTGTATGAAATCACTCAGCTTAACTGAGCGAGGTTATGCCAGACTGCTCGTCTAGAGAACGGGAGAGGGACGTGGAATTCCGGGTGTAGTGGTGAAATGCGTAGAGATCCGGAGGAACCCCTGAGGCGAAGGCGGCGTCCTGGCCCGATTCTGACATTCAGACA
ASV_320	0	0	0	0	24	0	0	0	18	14	38	0	57	0	25	61	38	98	0	0	0	Bacteria	Planctomycetota	BD7-11	NA	NA	NA	NA	CGTTGTTCGGAATCACTGGGCATAAAGCGCACGTAGGCGGTGCCGTAAGTCGGATGTGAAATCCCTCGGCCTAACCGAGGAACTGCGTCCGATACTGCGGTGCTTGAGGATCAGAGGGGTGCATGGAATTTCCGGTGGAGCGGTGAAATGCGTTGATATCGGAAGGAACTCCGGCGGCGAAAGCGATGCACTGGCTGATTTCTGACGCTGAGGTG
ASV_321	0	0	0	0	0	0	0	0	0	15	0	0	358	0	0	0	0	0	0	0	0	Bacteria	Acidobacteriota	Acidobacteriae	Acidobacteriales	NA	NA	NA	CGTTGTTCGGAATTATTGGGCGTAAAGGGCGCGTAGGCGGTGCGGTAAGTCACCTGTGAAACCTCTAGGCTTAACCTAGAGCCTGCAGGCGAAACTGCCGTGCTTGAGGGTGGGAGAGGTGCGTGGAATTCCCGGTGTAGCGGTGAAATGCGTAGATATCGGGAGGAACACCTGTGGCGAAAGCGGCGCACTGGACCACTTCTGACGCTGAGGCG
ASV_322	0	0	0	62	0	0	0	266	0	0	0	0	0	41	0	0	0	0	0	0	0	Bacteria	Bacteroidota	Bacteroidia	Chitinophagales	Chitinophagaceae	NA	NA	CGTTATCCGGATTCACTGGGTTTAAAGGGTGCGTAGGCGGGCAGGTAAGTCAGTGGTGAAATCTCCGAGCTTAACTCGGAAACTGCCGTTGATACTACTTGTCTTGAATATTGTGGAGGTAAGCGGAATATGTCATGTAGCGGTGAAATGCTTAGATATGACATAGAACACCAATTGCGAAGGCAGCTTACTACACAATCATTGACGCTGAGGCA
ASV_323	0	0	0	0	0	0	0	0	80	96	126	0	26	0	40	0	0	0	0	0	0	Bacteria	Proteobacteria	Alphaproteobacteria	Rhizobiales	Xanthobacteraceae	NA	NA	CGTTGCTCGGAATCACTGGGCGTAAAGCGCACGTAGGCGGATTGCTAAGTCAGGGGTGAAATCCTGGAGCTCAACTCCAGAACTGCCTTTGATACTGGCGATCTTGAGTCCGGGAGAGGTGAGTGGAACTGCGAGTGTAGAGGTGAAATTCGTAGATATTCGCAAGAACACCAGTGGCGAAGGCGGCTCACTGGCCCGGTACTGACGCTGAGGTG
ASV_324	0	363	0	0	0	0	0	0	0	0	0	0	0	0	0	0	0	0	0	0	0	Bacteria	Chloroflexi	Ktedonobacteria	Ktedonobacterales	Ktedonobacteraceae	FCPS473	NA	TACGTAGGGGGCAAGCGTTGTCCGGAATTATTGGGCGTAAAGCGCGTGCAGGCGGTTCAACAAGTTCAGGGTGACAGTCACCGGCCTAACCGGTGAAGTGTTCTGAAAACTATTGGACTTGAGAGCGAGAGAGGGACCTGGAACTCCGGGTGGAGCGGTGAAATGCGTAGAGATCCGGAAGAACACCAAAGGCGAAGGCAGGGTCCTGGCTCGTTTCTGACGCTGAGGCGCGAAAGCAAGGGGAGC
ASV_325	0	0	0	0	181	0	0	0	0	0	0	0	182	0	0	0	0	0	0	0	0	Bacteria	Planctomycetota	Planctomycetes	Gemmatales	Gemmataceae	NA	NA	CGTTGTTCGGAATCACTGGGCTTAAAGGGCGCGTAGGCGGTCGGTCAAGTCTGGGGTGAAATCTTTCGGCTCAACCGGAAAAGTGCCCCGGATACTGATCGGCTGGAGGGAGGTAGGGGTCGGCGGAACTTCCGGTGGAGCGGTGAAATGCGTAGATATCGGAAGGAACACCGGTGGCGAAAGCGGTCGACTGGACCTTTTCTGACGCTGAGGCG
ASV_326	0	0	29	115	0	0	14	157	0	0	0	14	0	32	0	0	0	0	0	0	0	Bacteria	Acidobacteriota	Acidobacteriae	Acidobacteriales	Acidobacteriaceae (Subgroup 1)	Acidipila-Silvibacterium	NA	CGTTGTTCGGAATTATTGGGCGTAAAGGGTGCGTAGGCGGTTCGGTAAGTTTCGTGTGAAATCTTCGGGCTCAACTCGAAGCCTGCACGAAATACTGCCGGGCTTGAGTGTGGGAGAGGTGAGTGGAATTTCCGGTGTAGCGGTGAAATGCGTAGATATCGGAAGGAACACCTGTGGCGAAAGCGGCTCACTGGACCACAACTGACGCTGAGGCA
ASV_327	0	0	0	0	0	0	0	0	265	0	94	0	0	0	0	0	0	0	0	0	0	Bacteria	Chloroflexi	Ktedonobacteria	Ktedonobacterales	Ktedonobacteraceae	1921-3	NA	CGTTGTCCGGAGTACTGGGCGTAAAGCGCACGCAGGCGGTCGCCCGCGTTCGGCTGACAGTGGAGGGCTTCACTCTCCAAGGCGTCGAAAAACGGGGTGACTGGAGGGCCTCAGAGGGACCTGGAACTCCGGGTGGAGCGGTGAAATGCGTAGAGATCCGGAAGAACACCACAGGCGAAGGCAGGGTCCTGGGAGGTACCTGACGCTCAGGTGCG
ASV_328	0	358	0	0	0	0	0	0	0	0	0	0	0	0	0	0	0	0	0	0	0	Bacteria	GAL15	NA	NA	NA	NA	NA	GACGTAGGGGGCGAGCGTTGTCCGGAATTACTGGGCGTAAAGCGCGTGTAGGCGGCCTGGTAAGTCCCGTGTGAAAGCCTACGGCTCAACTGTAGGAGGTCGCGGGATACTGCTAGGCTTGAGGGCAGGAGAGGGAAGTAGAATTCCCGGTGTAGCGGTGAAATGCGTAGATATCGGGAGGAATGCCAGTGGCGAAGGCGGCTTCCTGGCCTGTCCCTGACGCTGAGACGCGAAAGCTGGGGGAGC
ASV_329	0	0	0	44	0	55	44	0	0	0	0	143	0	72	0	0	0	0	0	0	0	Bacteria	NA	NA	NA	NA	NA	NA	CGTTACCCGGATTTACTGGGCGTAAAGCGCGCGTAGGTGGGGCCTTAAGTCGGGCGTGAAAGCCCCTGGCTCAACTGGCGGAGGCCGTCCGAAACCGTCGGGCTTGAGCACCGGAGAGGGACGTGGAATTCCCGGTGGAGCGGTGAAATGCGTAGAGATCGGGAGGAACACCAGTGGGGAAGCCGGCCACCTGGCTCGTTCCTGACACTGAGGCG
ASV_330	0	0	0	0	26	0	0	0	15	12	109	0	8	0	0	12	59	110	0	0	5	Bacteria	Armatimonadota	Chthonomonadetes	Chthonomonadales	Chthonomonadaceae	Chthonomonas	NA	CGTTGTCCGAAGTTACTGGGCGTAAAGGGCGCGTAGGCGGGTCGATAAGTCTGCTGTGAAAGCCCGGGGCTCAACCCCGGAGGGTCGGTGGATACTATCGGTCTTGAAGGTGCTAGGGGGAGATGGAATTACCGGTGTAGCGGTGAAATGCGTAGATATCGGTAGGAACACCAGTGGCGAAGGCGGTCTCCTGGGGCACTCTTGACGCTGAGGCG
ASV_331	0	0	0	0	57	0	0	0	0	0	15	0	10	0	47	20	22	184	0	0	0	Bacteria	Chloroflexi	Ktedonobacteria	B12-WMSP1	NA	NA	NA	CGTTGTCCGGAATTACTGGGCGTAAAGAGCGCGCAGGCGGTCTGGTACGACATGTGTGAAAGCCCCCGGCTCAACTGGGGAGGGTCATGTGTAACGGCCGGACTATGAGTGCAGGAGAGGGACGTGGAACTCCGGGAGTAGCGGTGAAATGCGTAGAGACCCGGAGGAACACCAGTGGCGAAGGCGGCGTCCTGGTCTGCGACTGACGCTGAGGC
ASV_332	0	0	0	0	26	0	4	0	10	122	67	0	4	0	62	19	8	17	0	4	10	Bacteria	Chloroflexi	NA	NA	NA	NA	NA	CGTTATCCGGAATTACTGGGCGTAAAGCGCGCGCAGGCGGCCGCGTGCAGTTGGGCGTAAAAGCTCCCGGCTCAACTGGGAGTAGTCGTTCAAGACGGCGGGGCTAGAGGGTCGGAGAGGCCGGTGGAATTCCCGGTGTAGTGGTGAAATGCGTAGAGATCGGGAGGAACACCAGTGGCGGAAGCGGCCGGCTGGTCGGCACCTGACGCTGAGGC
ASV_333	0	0	0	0	0	0	0	0	78	255	0	0	14	2	0	0	0	0	0	0	0	Bacteria	Proteobacteria	Alphaproteobacteria	Sphingomonadales	Sphingomonadaceae	Novosphingobium	NA	CGTTGTTCGGAATTACTGGGCGTAAAGCGCGCGTAGGCGGTTACTCAAGTCAGAGGTGAAAGCCCGGGGCTCAACCCCGGAACTGCCTTTGAAACTAGGTGACTAGAATCTTGGAGAGGTCAGTGGAATTCCGAGTGTAGAGGTGAAATTCGTAGATATTCGGAAGAACACCAGTGGCGAAGGCGACTGACTGGACAAGTATTGACGCTGAGGTG
ASV_334	0	0	0	0	0	0	0	0	0	109	240	0	0	0	0	0	0	0	0	0	0	Bacteria	Proteobacteria	Alphaproteobacteria	Caulobacterales	Caulobacteraceae	Phenylobacterium	NA	CGTTGCTCGGAATTACTGGGCGTAAAGGGCGCGTAGGCGGATGTTTAAGTCAGAGGTGAAAGCCCAGGGCTCAACCTTGGAACTGCCTTTGATACTGGACATCTTGAGTACGGGAAAGGTGAGTGGAACTCCGAGTGTAGAGGTGAAATTCGTAGATATTCGGAAGAACACCAGTGGCGAAGGCGACTCACTGGCCCGTTACTGACGCTGAGGCG
ASV_335	0	0	0	0	282	0	0	0	0	0	11	0	55	0	0	0	0	0	0	0	0	Bacteria	Acidobacteriota	Holophagae	Subgroup 7	NA	NA	NA	CGTTATTCGGAATTATTGGGCGTAAAGGGCGCGTAGGCGGCCATGCGTGTCTTCCGTGAAATCCCTCGGCTTAACTGAGGACGTGCGGAAGAAACTGCAAGGCTCGAGTCCGGGAGAGGGGGGTGGAATTCCCAGTGTAGCGGTGAAATGCGTAGATATTGGGAGGAACACCGGTGGCGAAGGCGGCCCCCTGGACCGGAACTGACGCTGAGGCG
ASV_336	0	0	0	0	0	0	7	0	14	0	18	0	0	0	117	61	0	0	0	29	102	Bacteria	Myxococcota	Polyangia	Polyangiales	Polyangiaceae	Pajaroellobacter	NA	CGTTGTTCGGAATTACTGGGCGTAAAGCGTGTGTAGGCGGCTTCGTAAGTCGGATGTGAAAGCCCCGGGCTCAACCCGGGAAGTGCACTCGATACTGCGGAGCTCGAGTACTGGAGAGGTTGGTGGAATTCTCGGTGTAGAGGTGAAATTCGTAGATATCGAGAGGAACACCGGTGGCGAAGGCGGCCAACTGGACAGATACTGACGCTGAGACA
ASV_337	0	0	0	0	50	0	0	0	0	0	0	0	180	0	0	16	0	97	0	0	0	Bacteria	Acidobacteriota	Acidobacteriae	Subgroup 2	NA	NA	NA	CGTTGCTCGGAATTACTGGGCGTAAAGGGTTCGTAGGCGGTGTGGCAAGTCGGGGGTGAAATCTCTGGGCTTAACCCAGAGGCTGCCTCCGAAACTGCTGTGCTCGAGTGCGGGAGAGGCGAGTGGAATTGCAGGTGTAGCGGTGAAATGCGTAGATATCTGCAGGAACACCCGGGGCGAAGGCGGCTCGCTGGACCGCAACTGACGCTGAGGAA
ASV_338	0	0	0	0	226	0	0	0	0	0	54	0	51	0	9	0	0	0	0	0	0	Bacteria	Actinobacteriota	Thermoleophilia	Solirubrobacterales	Solirubrobacteraceae	Conexibacter	NA	CGTTGTCCGGAATCATTGGGCGTAAAGAGCGTGTAGGTGGCTCGGTAAGTCCGCTGTGAAAGTCCAGGGCTCAACCCTGGAATGCCGGTGGAAACTGTCGGGCTAGAGTCCGGAAGAGGCGAGTGGAATTCCTGGTGTAGCGGTGAAATGCGCAGATATCAGGAGGAACACCAATGGCGAAGGCAGCTCGCTGGGACGGTACTGACACTGAGACG
ASV_339	0	0	0	0	0	0	0	0	0	43	8	0	0	0	0	0	0	0	287	0	0	Bacteria	Proteobacteria	Gammaproteobacteria	Pseudomonadales	Pseudomonadaceae	Pseudomonas	NA	CGTTAATCGGAATTACTGGGCGTAAAGCGCGCGTAGGTGGTTCGTTAAGTTGGATGTGAAATCCCCGGGCTCAACCTGGGAACTGCATTCAAAACTGACGAGCTAGAGTATGGTAGAGGGTGGTGGAATTTCCTGTGTAGCGGTGAAATGCGTAGATATAGGAAGGAACACCAGTGGCGAAGGCGACCACCTGGACTGATACTGACACTGAGGTG
ASV_340	0	0	16	20	0	11	18	0	0	0	0	85	0	180	0	0	0	0	0	0	7	Bacteria	Actinobacteriota	Thermoleophilia	Solirubrobacterales	Solirubrobacteraceae	Conexibacter	NA	CGTTGTCCGGAATCATTGGGCGTAAAGAGCGTGTAGGCGGCTCAGTAAGTCCGCTGTGAAAATCCAGGGCTCAACCCTGGAATGCCGGTGGAAACTGCCGAGCTCGAGTCCGGAAGAGGCGAGTGGAATTCCCGGTGTAGCGGTGAAATGCGCAGATATCGGGAGGAACACCAATGGCGAAGGCAGCTCGCTGGGACGGTACTGACGCTGAGACG
ASV_341	0	0	0	21	0	0	0	242	0	0	0	0	0	72	0	0	0	0	0	0	0	Bacteria	Planctomycetota	Phycisphaerae	Tepidisphaerales	WD2101 soil group	NA	NA	CGTTAGGCGGAATCACTGGGCTTAAAGCGTGTGTAGGCGGACTTCTAAGTACCTTGTGAAATCCCACGGCTTACCCGTGGAACTGCTGGGTATACTGGTTGTCTTGAGCCATCTAGGGGCTATCGGAACAAATGGTGGAGCGGTGAAATGCGTAGATATCATTTGGAACGCCAATGGTGAAAACAGGTAGCTGGGGATGTGCTGACGCTGAGACA
ASV_342	0	0	0	0	0	0	0	0	137	0	0	0	0	0	0	18	55	0	0	37	88	Bacteria	Dependentiae	Babeliae	Babeliales	Vermiphilaceae	NA	NA	CGTTATTCGGAATTATTGGGCGTAAAGGGTGCGTAGGCGGCATATTAAGTCAACTGTTAAATTCCTCGGCCTAACCGAGGCCCTGCAGTAGATACTGATGTGCTAGAGGGTGGAAGAGAGAAGTGGAATTCTCGGAGTAGCGGTAAAATGCGTAGATCTCGAGAGGAACACCAATGGCGAAGGCAGCTTCTTGGTCCACACCTGACGCTGAGGCA
ASV_343	0	0	0	0	0	0	0	0	0	118	0	0	53	0	0	39	46	77	0	0	0	Bacteria	Myxococcota	Polyangia	MSB-4B10	NA	NA	NA	CGTTGCTCGGAATCATTGGGCGTAAAGCGCACGTAGGCGGCTTGTTAAGTCGGGTGTGAAAGCCCTGGGCTCAACCCAGGAAGTGCACTCGAAACTGGCGAGCTTGAATATGGAAGAGGGTCGCGGAATTCCCGGTGTAGAGGTGAAATTCGTAGATATCGGGAGGAACACCAGTGGCGAAGGCGGCGACCTGGGCCAATATTGACGCTGAGGTG
ASV_344	0	0	0	0	0	0	0	0	4	0	0	0	15	0	4	14	10	285	0	0	0	Bacteria	Chloroflexi	Ktedonobacteria	Ktedonobacterales	Ktedonobacteraceae	NA	NA	CGTTGTCCGGAGTTACTGGGCGTAAAGCGCCCGCAGGCGGTCCGCTAAGTTCAGACTGACAATCCTCGGCTCAACCGAGGAGGGGGTATGAAAACTGGCAGACTTGAGGGATAGAGAGGGACATGGAATTCCGGGTGGAGTGGTGAAATGCGTAGATATCCGGAGGAACACCAAAGGCGAAGGCAATGTCCTGGCTATTTCCTGACGCTGAGGGG
ASV_345	0	0	35	6	0	118	13	0	0	0	0	63	0	96	0	0	0	0	0	0	0	Bacteria	Armatimonadota	Fimbriimonadia	Fimbriimonadales	NA	NA	NA	CGTTGTCCGGATTCACTGGGCGTAAAGAGCGCGTAGGCGGCCTGCTTAGTCAGGAGTGAAATCTCCAGGGCTCAACCCGGAAACTGCTTCTGATACTGGCAGGCTCGAGGGTCAGAGGGGTGATTGGAATTCCCGGTGTAGCGGTGACATGCATTGAGATCGGGAGGAACACCCGTGGCGAAGGCGGATCACTGGCTGATACCTGACGCTGAGGC
ASV_346	0	0	0	0	0	0	0	0	0	0	0	0	0	0	0	0	0	0	0	64	263	Bacteria	Proteobacteria	Alphaproteobacteria	Reyranellales	Reyranellaceae	Reyranella	NA	CGTTGTTCGGAATTACTGGGCGTAAAGCGCGTGTAGGCGGTTGTCCAAGTTGGATGTGAAAGCCTTGAGCTTAACTCAAGAAATGCATTCAGGACTGGATGACTAGAGGACCGGAGAGGATAGTGGAATTCCCAGTGTAGTGGTGAAATACGTAGAGATTGGGAAGAACACCAGTGGCGAAGGCGGCTATCTGGACGGTTTCTGACGCTAAGACG
ASV_347	0	0	0	0	0	0	0	0	0	0	0	0	0	0	0	0	0	0	0	60	265	Bacteria	Cyanobacteria	Vampirivibrionia	Obscuribacterales	Obscuribacteraceae	NA	NA	CGTTGTCCGGATTCATTGGGCGTAAAGAGTTCGTAGGCGGTTTGTTAAGTCTGATGTTAAAGATCAGGGCCCAACCCTGAAAGTGCATTGGATACTGGCAGACTGGAGTGCAGTAGAGGCAAGTGGAATTCCCAGTGTAGCGGTGAAATGCGTAGATATTGGGAAGAACACCGGTGGCGCAGGCGACTTGCTGGGCTGTAACTGACGCTGAGGAA
ASV_348	324	0	0	0	0	0	0	0	0	0	0	0	0	0	0	0	0	0	0	0	0	Bacteria	Bacteroidota	Kryptonia	Kryptoniales	BSV26	NA	NA	TACGTAGGATCCGAGCGTTGTCCGGAATTACTGGGTGTAAAGGGCGTGTAGGTGGGTCTCTCAGTCGGGGGTGAAATCCTACAGCTTAACTGTAGAATTGCTTCCGATACTGGAGATCTTGAGTGCGGCAGAGGGAGATGGAATTCATGGTGTAGCGGTGAAATGTGTAGATATCATGAAGAACACCAGTAGCGAAGGCGGTCTCCTGGTCCGTAACTGACACTGAGGCGCGAAAGCGTGGGGAGC
ASV_349	0	0	80	0	0	0	244	0	0	0	0	0	0	0	0	0	0	0	0	0	0	Bacteria	Proteobacteria	Alphaproteobacteria	Rhizobiales	Xanthobacteraceae	NA	NA	CGTTGCTCGGAATCACTGGGCGTAAAGGGTGCGTAGGCGGATCTTTAAGTCAGGGGTGAAATCCTGGAGCTCAACTCCAGAACTGCCTTTGATACTGAAGATCTTGAGTTCGGGAGAGGTGAGTGGAACTGCGAGTGTAGAGGTGAAATTCGTAGATATTCGCAAGAACACCAGTGGCGAAGGCGGCTCACTGGCCCGATACTGACGCTGAGGCA
ASV_350	0	0	110	0	0	69	0	0	0	0	0	0	0	0	0	22	0	0	0	46	76	Bacteria	Proteobacteria	Alphaproteobacteria	Rhizobiales	Xanthobacteraceae	Bradyrhizobium	NA	CGTTGCTCGGAATCACTGGGCGTAAAGGGTGCGTAGGCGGGTTTTTAAGTCAGGGGTGAAATCCTGGAGCTCAACTCCAGAACTGCCTTTGATACTGAAGATCTTGAGTCCGGGAGAGGTGAGTGGAACTGCGAGTGTAGAGGTGAAATTCGTAGATATTCGCAAGAACACCAGTGGCGAAGGCGGCTCACTGGCCCGGTACTGACGCTGAGGCA
ASV_351	0	0	0	0	0	0	0	323	0	0	0	0	0	0	0	0	0	0	0	0	0	Bacteria	Planctomycetota	Phycisphaerae	Tepidisphaerales	WD2101 soil group	NA	NA	CGTTAGGCGGAATCACTGGGCTTAAAGCGTGTGTAGGCGGACTTCTAAGTACCTTGTGAAATCCCACGGCTTACCCGTGGAACTGCTGGGTATACTGGTTGTCTTGAGCCATCTAGGGGCTACCGGAACAAATGGTGGAGCGGTGAAATGCGTAGATATCATTTGGAACGCCAATGGTGAAAACAGGTAGCTGGGGATGTGCTGACGCTGAGACA
ASV_352	0	0	0	0	86	0	0	0	0	0	0	0	208	0	0	0	0	28	0	0	0	Bacteria	Proteobacteria	Alphaproteobacteria	Rhizobiales	Beijerinckiaceae	NA	NA	CGTTGTTCGGAATTACTGGGCGTAAAGCGCACGTAGGCGGATCTTTAAGTCAGGGGTGAAATCCCGAGGCTCAACCTCGGAACTGCCTTTGATACTGGGGATCTCGAGTCCGGGAGAGGTGAGTGGAACTGCGAGTGTAGAGGTGAAATTCGTAGATATTCGCAAGAACACCAGTGGCGAAGGCGGCTCACTGGCCCGGTACTGACGCTGAGGTG
ASV_353	0	0	177	20	0	0	92	0	0	0	0	0	0	20	0	0	0	0	0	0	0	Bacteria	Chloroflexi	Ktedonobacteria	Ktedonobacterales	Ktedonobacteraceae	NA	NA	CGTTCTCCGGAATGACTGGGCGTAAAGGGCACGCAGGCGTCGCGCGCGTGTCGGGTGAAAGTTCCCGCGTGAATCGGGAAGGGTCTCGGCAAACGGCGCGACTTGAGAGCGAGAGAGGGACATGGAATTCCTGGTGGAGCGGTGAAATGCGTAGAGATCAGGAAGAACACCGAAGGCGAAGGCAGTGTCCTGGCTCGTCTCTGACGCTCAGGTGC
ASV_354	0	0	0	0	152	0	0	0	0	0	67	0	73	0	0	0	0	0	0	17	0	Bacteria	Planctomycetota	Planctomycetes	Gemmatales	Gemmataceae	NA	NA	CGTTGTTCGGATTCACTGGGCTTAAAGGGCGCGTAGGCGGGTCTCCAAGTCTGTGGTGAAAGCCCCCGGCTTAACCGGGGAAGTGCCGTGGATACTGGGGATCTCGAGGGGTGCAGGGGCATGCGGAACTTCCGGTGGAGCGGTGAAATGCGTAGATATCGGAAGGAACGCCGGTGGCGAAAGCGGCGTGCTGGACACCTACTGACGCTGAGGCG
ASV_355	277	31	0	0	0	0	0	0	0	0	0	0	0	0	0	0	0	0	0	0	0	Bacteria	Acidobacteriota	Blastocatellia	Pyrinomonadales	Pyrinomonadaceae	Pyrinomonas	NA	TACGTAGGGGGCAAGCGTTGTTCGGATTTACTGGGCGTAAAGCGCGCGTAGGCGGCACTGCAAGTCACTTGTGAAATCTCCGGGCTTAACTCGGTAGGGGCCAAGTGATACTGCAGAGCTAGAGTGCGGAAGGGGCAGCTGGAATTCTCGGTGTAGCGGTGAAATGCGTAGATATCGAGAGGAACACCGGTGGCGAAGGCGGGCTGCTGGGCCGACACTGACGCTGAGGCGCGAAAGCTAGGGGAG
ASV_356	0	0	0	0	0	0	0	0	71	60	15	0	0	0	22	58	55	12	0	0	13	Bacteria	Myxococcota	Myxococcia	Myxococcales	Anaeromyxobacteraceae	Anaeromyxobacter	NA	CGTTGTTCGGAATTATTGGGCGTAAAGCGCATGTAGGCGGTCTGTTAAGTCGCGTGTGAAATCCCTAGGCTTAACCTAGGAAGTGCGCGCGAAACTGGCGGACTTGAGTGCTGGAGAGGGTCGCGGAATTCCCGGTGTAGAGGTGAAATTCGTAGATATCGGGAGGAACACCAGTGGCGAAGGCGGCGACCTGGACAGACACTGACGCTGAGACG
ASV_357	0	0	0	0	0	0	0	0	0	0	0	0	0	0	0	0	47	258	0	0	0	Bacteria	Proteobacteria	Alphaproteobacteria	Rhizobiales	Xanthobacteraceae	Rhodoplanes	NA	CGTTGCTCGGAATCACTGGGCGTAAAGCGCACGTAGGCGGCTTCTTAAGTCAGGGGTGAAATCCTGGAGCTCAACTCCAGAACTGCCTTTGATACTGAGGAGCTTGAGTCCGGGAGAGGTGAGTGGAACTGCGAGTGTAGAGGTGAAATTCGTAGATATTCGCAAGAACACCAGTGGCGAAGGCGGCTCACTGGCCCGGTACTGACGCTGAGGTG
ASV_358	302	0	0	0	0	0	0	0	0	0	0	0	0	0	0	0	0	0	0	0	0	Bacteria	NA	NA	NA	NA	NA	NA	AACGTAGGGGCCAAGCGTTACCCGGATTTACTGGGCGTAAAGCGCGCGTAGGTGGGGCCTTAAGTCGGGCGTGAAAGCCCCTGGCTCAACTGGCGGAGGCCGTCCGAAACCGTCGGGCTTGAGCACCGGAGAGGGACGTGGAATTCCCGGTGGAGCGGTGAAATGCGTAGAGATCGGGAGGAACACCAGTGGGGAAGCCGGGCCACCTGGCTCGTTCCTGACACTGAGGCGCGAAAGCGTGGGGAG
ASV_359	0	299	0	0	0	0	0	0	0	0	0	0	0	0	0	0	0	0	0	0	0	Bacteria	Chloroflexi	Ktedonobacteria	Ktedonobacterales	Ktedonobacteraceae	1921-3	NA	TACGTAGGGGGCGAGCGTTGTCCGGAGTACTGGGCGTAAAGCGCACGCAGGCGGTCGCCCGCGTTTCGGCTGACAGTGGAGGGCTTCACTCTCCAAGGCGTCGAAAAACGGGGTGACTGGAGGGCCTCAGAGGGACCTGGAACTCCGGGTGGAGCGGTGAAATGCGTAGAGATCCGGAAGAACACCACAGGCGAAGGCAGGGTCCTGGGAGGTACCTGACGCTCAGGTGCGAAAGCGAGGGGAGCG
ASV_360	0	0	0	0	247	0	0	0	0	0	52	0	0	0	0	0	0	0	0	0	0	Bacteria	Proteobacteria	Gammaproteobacteria	Xanthomonadales	Rhodanobacteraceae	Rhodanobacter	NA	CGTTACTCGGAATTACTGGGCGTAAAGGGTGCGTAGGTGGTTGTTTAAGTCTGTTGTGAAAGCCCCGGGCTCAACCTGGGAATGGCAATGGATACTGGACAGCTAGAGTGCGGTAGAGGGTAGTGGAATTCCCGGTGTAGCAGTGAAATGCGTAGAGATCGGGAGGAACACCAGTGGCGAAGGCGGCTACCTGGACCAGCACTGACACTGAAGCA
ASV_361	0	0	0	0	0	0	0	0	52	12	0	0	0	0	31	49	58	77	0	0	19	Bacteria	Acidobacteriota	Acidobacteriae	Subgroup 2	NA	NA	NA	ATGTGTCAGCGCCGCGGTAAGACGTAGGGGGCCAGCGTTGTTCGGAATTACTGGGTGTAAAGGGTTCGTAGGCGGTGTAGCAAGTCGGGAGTGAAATCTATGGGCTTAACCCATAGGCTGCTTCCGAAACTGCTGTGCTTGAGTGTGGGAGAGGCGCGTGGAATTGCAGGTGTAGCGGTGAAATGCGTAGATATCTGCAGGAACACCCGTGGCGA
ASV_362	297	0	0	0	0	0	0	0	0	0	0	0	0	0	0	0	0	0	0	0	0	Bacteria	Bacteroidota	Bacteroidia	Chitinophagales	Chitinophagaceae	NA	NA	TACGGAGGGTGCAAGCGTTATCCGGATTCACTGGGTTTAAAGGGTGCGTAGGCGGATAGGTAAGTCCGTGGTGAAATCCTGCAGCTTAACTGCAGAACTGCCGTGGATACTATCTATCTTGAATGTCGTGGAGGTTAGCAGAATATGTCATGTAGCGGTGAAATGCTTAGATATGACATAGAATACCCATTGCGAAGGCAGCTAACTACGCGATAATTGACGCTGAGGCACGAAAGCGTGGGGATC
ASV_363	0	0	0	0	13	0	0	0	48	0	43	0	0	0	45	40	22	59	0	6	20	Bacteria	Armatimonadota	NA	NA	NA	NA	NA	CGTTGTCCGGATTTACTGGGCGTAAAGCGCGTGTAGGCGGCGATTTAAGTCGGGTGTGAAAGCCCGGGGCTCAACCCCGGAGTGCCGCCCGAGACTGGGTCGCTTGAGGACGGAAGAGGGGCGTGGAATTCCTGGTGTAGCGGTGAAATGCGTAGAGATCAGGAGGAACACCCGTGGCGAAGGCGGCGCCCTGGTCCGTTACTGACGCTGAGACG
ASV_364	0	0	0	118	0	0	0	54	0	0	0	0	0	122	0	0	0	0	0	0	0	Bacteria	Bacteroidota	Bacteroidia	Cytophagales	Hymenobacteraceae	Hymenobacter	NA	CGTTGTCCGGATTTATTGGGTTTAAAGGGTGCGTAGGCGGCTTTTTAAGTCTGGGGTGAAAGCCCGCTGCTCAACAGCGGAACTGCCCTGGATACTGGAGAGCTTGAGTACAGACGAGGTTGGCGGAATGGACTGAGTAGCGGTGAAATGCATAGATACAGTCCAGAACCCCGATTGCGAAGGCAGCTGACTAGGCTGTTACTGACGCTGAGGCA
ASV_365	0	0	0	23	13	0	19	2	29	36	20	4	0	30	10	47	43	17	0	0	0	Bacteria	Chloroflexi	Ktedonobacteria	B10-SB3A	NA	NA	NA	CGTTATCCGGAGTGATTGGGCGTACAGCGCGCGTAGGCGGGCCGGGGAGTCGTGCGTGAAAGGTGGGGGCTCAACCCCCAGAGGTCGCACGAGACCCTCGGTCTTGGGCCCGGTAGGGGGCGGTGGAATTCCGCGAGGAGTGGTGAAATGCGTTGAGACGCGGAGGAACACCGGTGGCGAAGGCGGCCGCCTGGGCCGAGGCCGACGCTGAGGCG
ASV_366	0	0	0	0	132	0	0	0	0	0	11	0	144	0	0	0	0	0	0	0	5	Bacteria	Planctomycetota	Planctomycetes	Gemmatales	Gemmataceae	NA	NA	CGTTGTTCGGAATCACTGGGCTTAAAGGGCGCGTAGGCGGTTCATCAAGTCAGGGGTGAAATCTTTCGGCTCAACCGGAAAAGTGCCCCTGATACTGATGATCTCGAGGGAGGTAGGGGCCTGCGGAACTTCTGGTGGAGCGGTGAAATGCGTTGATATCAGAAGGAACGCCGGTGGCGAAAGCGGCGGGCTGGACCTCTTCTGACGCTGAGGCG
ASV_367	0	0	0	0	44	0	0	0	26	0	18	0	10	0	0	29	90	75	0	0	0	Bacteria	Chloroflexi	Anaerolineae	Caldilineales	Caldilineaceae	NA	NA	CGTTATCCGGATTTATTGGGCGTAAAGCGCACGCAGGCGGCCGATTAAGTCTGACGTGAAATCTCTCGGCTTAACCGGGAGCGGTCGTTGGAAACTAATCAGCTTGAGGCGAGGAGAGGGGTGTGGAATTCCCGGTGTAGTGGTGGAATGCGTAGATATCGGGAGGAACATCAGTGGCGAAAGCGGCACCCTGGCCTTAGCCTGACGCTCAGGTG
ASV_368	0	0	0	0	0	0	0	0	0	0	0	292	0	0	0	0	0	0	0	0	0	Archaea	Crenarchaeota	Nitrososphaeria	SCGC AB-179-E04	NA	NA	NA	TGGTCGGGACGATTATTGGGCCTAAAGCATCCGTAGCCGGCTTCACAGGTCTCTTGTTAAATCTAACGGCTCAACCGTTGGACCGCAGGAGATACCATGGAGCTAGGGGGCGGGAGAGGCGGACGGTACTCCATGGGTAGGGGTAAAATCCTTTGATCCATGGAAGACCACCAGTGGCGAAGGCGGTCCGCTAGAACGCGCCCGACGGTGAGGGA
ASV_369	0	0	13	56	0	0	0	4	0	0	0	39	0	178	0	0	0	0	0	0	0	Bacteria	Firmicutes	Sulfobacillia	Sulfobacillales	Sulfobacillaceae	NA	NA	CGTTGTCCGGAATTACTGGGCGTAAAGGGCGTCTAGGCGGCACGGTACGTCGGGAGTGAAAGACGCGGGCTCAACCCGCGGCGCGCTTGCGAAACGGCCGAGCTGGAGGGCCGGAGAGGGAAGCGGAATTGCCGGTGTAGCGGTGAAATGCGTAGAGATCGGCAGGAACACCAGTGGCGAAGGCGGCTTCCTGGACGGTACCTGACGCTGAAGCG
ASV_370	0	0	0	0	184	0	0	0	0	0	0	0	15	0	0	0	12	77	0	0	0	Bacteria	Planctomycetota	BD7-11	NA	NA	NA	NA	CGTTGTTCGGAATCACTGGGCATAAAGCGCACGTAGGCGGCGATGTAAGTCGGGTGTGAAATCCCTCGGCCCAACCGAGGAACTGCGCCCGAAACTGCATTGCTTGAGGATCAAAGGGGTGCTCGGAATTTCCGGTGGAGCGGTGAAATGCGTTGATATCGGAAGGAACGTCGGCGGCGAAAGCGGAGCACTGGTTGATTTCTGACGCTGAGGTG
ASV_371	0	0	0	0	0	0	0	0	143	48	0	0	0	0	84	0	0	0	0	9	0	Bacteria	Myxococcota	Polyangia	Polyangiales	Polyangiaceae	Pajaroellobacter	NA	CGTTGTTCGGAATACTGGGCGTAAAGCGTGTGTAGGCGGCTACGCAAGTCGGATGTGAAATCCCCGGGCTCAACCCGGGAAGTGCACCCGAAACTGCGTGGCTTGAGTACCGGAGAGGTTGGTGGAATTCTCGGTGTAGAGGTGAAATTCGTAGATATCGAGAGGAACACCGGTGGCGAAGGCGGCCAACTGGACGAGTACTGACGCTGAGACAC
ASV_372	0	0	0	0	180	0	0	0	0	18	30	0	34	0	0	0	0	21	0	0	0	Bacteria	Myxococcota	Myxococcia	Myxococcales	Anaeromyxobacteraceae	Anaeromyxobacter	NA	CGTTGTTCGGAATTATTGGGCGTAAAGCGCTTGTAGGCGGCTTGTTAAGTCGCGTGTGAAATCCCCAGGCTTAACCTGGGAAGTGCGCGCGAAACTGGCGAGCTTGAATGCCGGAGAGGGTCGCGGAATTCCCGGTGTAGAGGTGAAATTCGTAGATATCGGGAGGAACACCAGTGGCGAAGGCGGCGACCTGGACGGACATTGACGCTGAGACG
ASV_373	0	0	0	0	26	0	0	0	20	140	55	0	0	0	0	0	0	42	0	0	0	Bacteria	Proteobacteria	Gammaproteobacteria	Burkholderiales	Oxalobacteraceae	Actimicrobium	NA	CGTTAATCGGAATTACTGGGCGTAAAGCGTGCGCAGGCGGTTATGTAAGACAGATGTGAAATGCCCGGGCTCAACCTGGGAACTGCATTTGTGACTGCATGGCTAGAGTGTGTCAGAGGGGGGTAGAATTCCACGTGTAGCAGTGAAATGCGTAGAGATGTGGAGGAATACCGATGGCGAAGGCAGCCCCCTGGGATAACACTGACGCTCATGCA
ASV_374	0	0	0	0	33	0	0	0	0	0	0	0	234	0	0	16	0	0	0	0	0	Bacteria	Planctomycetota	Planctomycetes	Isosphaerales	Isosphaeraceae	Candidatus Nostocoida	NA	CGTTATTCGGAATCACTGGGCTTAAAGCGCGTGTAGGCGGGAGGGCACGTCGGCCGCTGAAATCCCCCGGCTCAACCGGGGAACGGGCGCCGATACGACCGTCCTGGAGGGACGTAGGGGGACCTGGAACTTCCGGTGGAGCGGTGAAATGCGTTGAGATCGGAAGGAACGCCCGTGGCGAAAGCGAGGTCCTGGACGTTTTTCTGACGCTGAGA
ASV_375	0	0	0	0	36	0	0	0	119	58	55	0	0	0	0	15	0	0	0	0	0	Bacteria	Acidobacteriota	Acidobacteriae	Bryobacterales	Bryobacteraceae	Bryobacter	NA	CGTTGTTCGGAGTTACTGGGCGTAAAGAGTGTGTAGGCGGTGCTCTAAGTTTGGTGTGAAATCTCCCGGCTCAACTGGGAGGGTGCGCCGAAAACTGGAGTGCTTGAGTATGGGAGAGGAAAGCGGAATTCCTGGTGTAGCGGTGAAATGCGTAGATATCAGGAGGAACACCTGCGGTGTAGACGGCTTTCTGGACCATCACTGACGCTGAGACA
ASV_376	0	0	0	0	31	0	0	0	63	32	16	0	2	0	22	41	55	17	0	3	0	Bacteria	NA	NA	NA	NA	NA	NA	CGTTGTCCGGAATGACTGGGCGTAAAGGGCGCGTAGGTGGCGCATCAAGACCAGCGTGAAATCGCCGCGCTTACCGTGGCGGGGTCGTTGGTGACTGGTGGGCTAGGGTTCGGCAGAGGTCGGTAGAATTCCCGGTGGAGCGGTGAAATGCGTAGAGATCGGGAGGAATACCAGTGGCGAAGGCGGCCGACTGGGCCGGGACCGACACTGAGGCG
ASV_377	0	0	0	0	0	0	0	0	0	0	0	0	0	0	0	0	0	0	0	11	271	Bacteria	Proteobacteria	Alphaproteobacteria	Sphingomonadales	Sphingomonadaceae	Sandarakinorhabdus	NA	CGTTGTTCGGAATACTGGGCGTAAAGCGTACGTAGGCGGCCATTCAAGTCAGAGGTGAAAGCCCAGGGCTCAACCTTGGAACTGCCTTTGAAACTAGATGGCTTGATCACGGGAGAGGTGAGTGGAATTCCGAGTGTAGAGGTGAAATTCGTAGATATTCGGAAGAACACCAGTGGCGAAGGCGGCTCACTGGACCGTTGATGACGCTGAGGTAC
ASV_378	0	280	0	0	0	0	0	0	0	0	0	0	0	0	0	0	0	0	0	0	0	Bacteria	Acidobacteriota	Holophagae	Subgroup 7	NA	NA	NA	TACGGAGGGGGCAAGCGTTACTCGGAATTATTGGGCGTAAAGGGCGCGTAGGCGGTCGTGTGCGTCAGGGGTGAAATCCCCAGGCTTAACCTGGGACGTGCCTCTGATACGGCATGGCTTGAGTCCGGGAGAGGGGAGCAGAATTCCCAGTGTAGCGGTGAAATGCGTAGATATTGGGAGGAATACCGGTGGCGAAGGCGGCTCCCTGGACCGGTTCTGACGCTGAGGCGCGAAAGCGTGGGTAGC
ASV_379	0	0	0	0	0	0	0	0	0	0	0	0	161	0	0	0	0	118	0	0	0	Bacteria	Proteobacteria	Alphaproteobacteria	Rhizobiales	Hyphomicrobiaceae	Hyphomicrobium	NA	CGTTGTTCGGAATCACTGGGCGTAAAGCGCACGTAGGCGGATTTGTAAGTCAGGGGTGAAATCCCGGGGCTCAACCTCGGAACTGCCTTTGATACTGCAAATCTCGAGTCCGATAGAGGTGGGTGGAATTCCTAGTGTAGAGGTGAAATTCGTAGATATTAGGAAGAACACCGGTGGCGAAGGCGGCCCACTGGATCGGTACTGACGCTGAGGTG
ASV_380	0	0	0	0	112	0	0	0	0	0	42	0	34	0	0	0	0	73	0	16	0	Bacteria	Proteobacteria	Gammaproteobacteria	Gammaproteobacteria Incertae Sedis	Unknown Family	Acidibacter	NA	CGTTAATCGGAATTACTGGGCGTAAAGCGTGCGTAGACGGTTATGTAAGTCGGGTGTGAAAGCCCCGGGCTCAACCTGGGAATTGCATTCGAGACTGGATAGCTAGGGTACGGAAGAGGGAAGCGGAATTTCAGGTGTAGCGGTGAAATGCGTAGATATCTGAAGGAACACCAGTGGCGAAAGCGGCTTCCTGGTCCAGTACCGACGTTCAGGCA
ASV_381	0	0	0	0	87	0	0	0	0	21	75	0	0	0	0	8	55	29	0	0	0	Bacteria	Chloroflexi	AD3	NA	NA	NA	NA	CGTTACCCGGATTTACTGGGCGTAAAGCGCGTGTAGGCGGCTGGTCAAGCGTGGTGTGAAATCTCCGGGCTCAACCCGGAAACTGCATTGCGAACTGGCCAGCTAGAGTGCAGGAGAGGGAAGCGGAATTCTCGGTGTAGCGGTGAAATGCGTAGATATCGAGAGGAACACCAGTGGCGAAGGCGGCTTCCTGGCCTGTAACTGACGCTGAGACG
ASV_382	0	0	0	0	169	0	0	0	0	0	0	0	104	0	0	0	0	0	0	0	0	Bacteria	Planctomycetota	Planctomycetes	Gemmatales	Gemmataceae	NA	NA	CGTTGTTCGGAATCACTGGGCTTAAAGGGCGCGTAGGCGGTCAATCAAGTCCGGGGTGAAATCTTTCGGCTTAACCGGAAAAGGGCCTTGGATACTGATTGGCTGGAGGGAGGTAGGGGCAGCTGGAACTTCCGGTGAAGCGGTGAAATGCGTTGATATCGGAAGGAACGCCGGTGGCGAAAGCGAGCTGCTGGACCTTTTCTGACGCTGAGGCG
ASV_383	0	0	0	0	25	0	0	0	0	30	17	0	17	0	0	0	83	101	0	0	0	Bacteria	RCP2-54	NA	NA	NA	NA	NA	CGTTGTTCGGATTGACTGGGCGTAAAGGGCGTGTAGGCGGTCGGCCAAGTCTGATGTGAAAGCCCGGGGCTCAGCCTCGGAAGTGCGTCGGAAACTAGTCGGCTGGAGCGCGATAGAGGAGGGTGGAATTCCTGGTGTAGCGGTGAAATGCGTAGATATCAGGAGGAACACCGGCGGCGAAGGCGGCCCTCTGGATCGTTGCTGACGCTGAGACG
ASV_384	0	0	0	0	0	0	0	0	0	0	0	0	63	0	127	18	0	0	0	35	30	Bacteria	Planctomycetota	Planctomycetes	Gemmatales	Gemmataceae	NA	NA	CGTTGTTCGGAATCACTGGGCTTAAAGGGCGCGTAGGCGGCTTGCCAAGTCAGGGGTGAAATCTTTCGGCTCAACCGGAAAAGTGCTTCTGATACTGGCGAGCTTGAGGGAGATAGGGGCATGCGGAACTTCCGGTGGAGCGGTGAAATGCGTTGATATCGGAAGGAACGCCGGTGGCGAAAGCGGCGTGCTGGATCTCTTCTGACGCTGAGGCG
ASV_385	0	0	0	0	0	0	0	0	0	0	0	0	0	0	52	31	0	0	0	0	190	Bacteria	Armatimonadota	Chthonomonadetes	Chthonomonadales	NA	NA	NA	CGTTGTCCGAAGTACTGGGCGTAAAGCGCGCGTAGGCGGGCGGTTAAGTGAGACGTGAAATGCCGGGGCTCAACCCCGGAACTGCATCTCATACTGGCCGTCTTGAGGGCATCAGAGAGAAGTGGAATGGCTGGTGTAGCGGTGAAATGCGTAGATATCAGTCGGAACACCCGTGGCGAAGGCGGCTTCTTGGGGTGTACCTGACGCTGAGGCGC
ASV_386	0	0	0	0	0	0	0	0	9	0	0	0	0	0	148	38	0	0	0	26	51	Bacteria	Planctomycetota	BD7-11	NA	NA	NA	NA	CGTTGTTCGGAATCACTGGGCATAAAGCGCACGTAGGCGGTGACGTAAGTCGGGTGTGAAATCCCTCGGCCTAACCGAGGAACTGCGCCCGATACTGCGTTGCTTGAGGACCAGAGGGGTGCATGGAATTTCCGGTGGAGCGGTGAAATGCGTTGATATCGGAAGGAACTCCGGCGGCGAAAGCGATGCACTGGCTGGTTTCTGACGCTGAGGTG
ASV_387	0	0	9	82	0	0	131	0	0	0	0	27	0	22	0	0	0	0	0	0	0	Bacteria	Planctomycetota	Planctomycetes	Isosphaerales	Isosphaeraceae	Aquisphaera	NA	CGTTATTCGGAATCACTGGGCTTAAAGCGCGTGTAGGCGGATGGGGACGTCGGTCGCTGAAATCCCCCGGCTCAACCGGGGAACTGGCACCGAAACGCCCCGTCTCGAGGGACGTAGGGGGACCTGGAACTTCCGGTGGAGCGGTGAAATGCGTTGAGATCGGAAGGAACGCCCGTGGCGAAAGCGAGGTCCTGGACGTCTTCTGACGCTGAGAC
ASV_388	0	0	0	0	180	0	0	0	0	0	89	0	0	0	0	0	0	0	0	0	0	Bacteria	Proteobacteria	Alphaproteobacteria	Caulobacterales	Caulobacteraceae	NA	NA	CGTTGCTCGGAATTACTGGGCGTAAAGGGCGCGTAGGCGGATGTTTAAGTCAGAGGTGAAAGCCCAGGGCTCAACCTTGGAACTGCCTTTGATACTGGGCATCTTGAGTATGGGAGAGGTGAGTGGAACTCCGAGTGTAGAGGTGAAATTCGTAGATATTCGGAAGAACACCAGTGGCGAAGGCGACTCACTGGCCCATTACTGACGCTGAGGCG
ASV_389	0	0	0	0	0	0	0	0	8	0	6	0	0	0	0	64	171	20	0	0	0	Bacteria	Dependentiae	Babeliae	Babeliales	Vermiphilaceae	NA	NA	CGTTATTCGGAATTACTGGGCGTAAAGGGTGCGTAGACGGTATGTTAAGTCTTCTGTTAAATACTTCGGCCTAACCGAAGATATGCGGTAGATACTGATGTACTAGAGGGTGGAAGAGAGAAGTGGAATTCCCGGAGTAGCGGTAAAATGCGTAGATCTCGGGAGGAACACCGATGGCGAAGGCAGCTTCTTGGTCCATACCTGACGTTGAGGCA
ASV_390	0	0	0	0	0	0	0	0	0	0	0	0	0	0	0	85	48	136	0	0	0	Bacteria	Proteobacteria	Alphaproteobacteria	Rhizobiales	Beijerinckiaceae	Methylovirgula	NA	CGTTGTTCGGATTTACTGGGCGTAAAGCGCACGTAGGCGGATTCTTAAGTCAGGGGTGAAATCCCGAGGCTCAACCTCGGAACTGCCTTTGATACTGGGGATCTTGAGTCCGGGAGAGGTGAGTGGAACTGCGAGTGTAGAGGTGAAATTCGTAGATATTCGCAAGAACACCAGTGGCGAAGGCGGCTCACTGGCCCGGTACTGACGCTGAGGTG
ASV_391	0	0	0	0	45	0	0	0	13	70	139	0	0	0	0	0	0	0	0	0	0	Bacteria	Proteobacteria	Alphaproteobacteria	Rhizobiales	Beijerinckiaceae	alphaI cluster	NA	CGTTGCTCGGAATCACTGGGCGTAAAGCGCACGTAGGCGGATCTTTAAGTCAGGGGTGAAATCCCAAGGCTCAACCTTGGAACTGCCTTTGATACTGGGGATCTCGAGTCCGGAAGAGGTGAGTGGAACTGCGAGTGTAGAGGTGAAATTCGTAGATATTCGCAAGAACACCAGTGGCGAAGGCGGCTCACTGGTCCGGTACTGACGCTGAGGTG
ASV_392	0	0	0	0	250	0	0	0	0	0	0	0	16	0	0	0	0	0	0	0	0	Bacteria	Chloroflexi	AD3	NA	NA	NA	NA	CGTTACCCGGATTTACTGGGCGTAAAGCGCGTGTAGGCGGCTGGCCAAGCGTGATGTGAAATCTTCGGGCTTAACCCGAAAACTGCATTGCGAACTGGTCTGGCTAGAGTGTGTGAGAGGGTAGTGGAATTCCCGGTGTAGCGGTGAAATGCGTAGATATCGGGAGGAACACCAGTGGCGAAGGCGGCTACCTGGCACACAACTGACGCTGAGAC
ASV_393	0	0	0	0	106	0	0	0	0	20	127	0	11	0	0	0	0	0	0	0	0	Bacteria	Myxococcota	Polyangia	Polyangiales	Polyangiaceae	Pajaroellobacter	NA	CGTTGTTCGGAATTACTGGGCGTAAAGCGTGTGTAGGCGGCTAGGTAAGTCGGATGTGAAAGCCCTGGGCTCAACCCAGGAAGTGCACTCGATACTGCTTAGCTCGAGTACCGGAGAGGTTGGTGGAATTCTCGGTGTAGAGGTGAAATTCGTAGATATCGAGAGGAACACCGGTGGCGAAGGCGGCCAACTGGACGAGTACTGACGCTGAGACA
ASV_394	0	0	0	0	0	0	0	0	0	24	0	0	240	0	0	0	0	0	0	0	0	Bacteria	Actinobacteriota	Thermoleophilia	Gaiellales	NA	NA	NA	CGTTGTCCGGATTTATTGGGCGTAAAGAGCGTGTAGGCGGCCAAACAGGTCCGCTGTGAAAACTCGAGGCTCAACCTCGAGCTGTCGGTGGAAACCGTGTGGCTAGAGTCCGGAAGAGGAGAGTGGAATTCCCGGTGTAGCGGTGAAATGCGCAGATATCGGGAAGAACACCCGTGGCGAAGGCGGCTCTCTGGGACGGTACTGACGCTGAGACG
ASV_395	0	0	0	0	157	0	0	0	0	0	18	0	59	0	0	0	0	29	0	0	0	Bacteria	Nitrospirota	Nitrospiria	Nitrospirales	Nitrospiraceae	Nitrospira	NA	CGTTGTTCGGATTTACTGGGCGTACAGGGAGCGTAGGCGGTTCGGTAAGCCCTCTGTGAAATCTCCAGGCTTAACCTGGAACAGTCGGAGGGGACTGCTGGGCTAGAGGACGGGAGAGGAGCGCGGAATTCCCGGTGTAGCGGTGAAATGCGTAGAGATCGGGAGGAAGGCCGGTGGCGAAGGCGGCGCTCTGGAACGTTTCTGACGCTGAGGCT
ASV_396	0	0	0	0	50	0	0	0	23	40	78	0	49	0	0	0	0	20	0	0	0	Bacteria	Proteobacteria	Alphaproteobacteria	Acetobacterales	Acetobacteraceae	NA	NA	CGTTGCTCGGAATGACTGGGCGTAAAGGGCGCGTAGGCGGCTTGTATAGTCAGGCGTGAAATTCCTGGGCTCAACCTGGGGACTGCGCTTGATACGTGCAGGCTTGAGTGTGGAAGAGGGTCGTGGAATTCCCAGTGTAGAGGTGAAATTCGTAGATATTGGGAAGAACACCGGTGGCGAAGGCGGCGACCTGGTCCATAACTGACGCTGAGGCG
ASV_397	0	0	0	25	0	7	123	0	0	0	0	0	0	102	0	0	0	0	0	0	0	Bacteria	Planctomycetota	Planctomycetes	Isosphaerales	Isosphaeraceae	Paludisphaera	NA	CGTTATTCGGAATCACTGGGCTTAAAGCGCGTGTAGGCGGATGGGAGCGTCGGAACCTGAAAGCCCCCGGCTCAACCGGGGAAGTGGGGCCGAAACGACCCGTCTGGAGGGACGTAGGGGGATCTGGAACTTCCGGTGGAGCGGTGAAATGCGTTGAGATCGGAAGGAACGCCCGTGGCGAAAGCGAGATCCTGGACGTTTTCTGACGCTGAGAC
ASV_398	0	0	0	0	198	0	0	0	0	0	0	0	13	0	17	0	0	27	0	0	0	Bacteria	Chloroflexi	AD3	NA	NA	NA	NA	CGTTATCCAGATTTACTGGGCGTAAAGCGCGTGTAGGCGGCTGGTTAGGTGTGATGTGAAATCTTCCGGCTCAACCGGAAAACTGCATTGCAAACCGGCCTGGCTAGAGTGCAGGAGAGGGAAGCGGAATTCCAGGTGTAGCGGTGAAATGCGTAGATATCTGGAGGAACACCAGTGGCGAAGGCGGCTTCCTGGCCTGCAACTGACGCTGAGAC
ASV_399	0	254	0	0	0	0	0	0	0	0	0	0	0	0	0	0	0	0	0	0	0	Bacteria	Planctomycetota	Planctomycetes	Gemmatales	Gemmataceae	NA	NA	GACGAACCGTGCAAACGTTGTTCGGAATCACTGGGCTTAAAGGGCGCGTAGGCGGGTCATCAAGTCCGGGGTGAAAGCCCCCAGCTCAACTGGGGAAGTGCCTTGGATACTGGTGGTCTTGAGGGAGGTAGGGGCATGCGGAACTTCCGGTGGAGCGGTGAAATGCGTAGATATCGGAAGGAACGCCGGTGGCGAAAGCGGCGTGCTGGACCTCTTCTGACGCTGAGGCGCGAAAGCCAGGGGAGC
ASV_400	0	0	0	0	115	0	0	0	0	0	0	0	137	0	0	0	0	0	0	0	0	Bacteria	Proteobacteria	Gammaproteobacteria	Burkholderiales	Burkholderiaceae	Limnobacter	NA	CGTTAATCGGAATTACTGGGCGTAAAGCGTGCGCAGGCGGTTCCGCAAGTCAGATGTGAAATCCCCGGGCTCAACCTGGGAACTGCATTTGAAACTACGGGGCTAGAGTGTGTCAGAGGGGGGTGGAATTCCACGTGTAGCAGTGAAATGCGTAGAGATGTGGAGGAACACCAATGGCGAAGGCAGCCCCCTGGGATGACACTGACGCTCATGCA
ASV_401	0	0	0	0	0	0	0	0	0	0	0	0	0	0	14	0	0	0	0	15	223	Bacteria	Proteobacteria	Gammaproteobacteria	Burkholderiales	Nitrosomonadaceae	mle1-7	NA	CGTTAATCGGAATTACTGGGCGTAAAGCGTGCGCAGGCGGCGCGTTAAGACAGGTGTGAAAGCCCCGAGCTTAACTTGGGAATTGCGCTTGTGACTGGCGTGCTGGAGTGTGGCAGAGGGAGGTGGAATTCCACGTGTAGCAGTGAAATGCGTAGAGATGTGGAGGAACACCGATGGCGAAGGCAGCCTCCTGGGCCAACACTGACGCTCATGCA
ASV_402	0	0	0	0	84	0	0	0	6	16	55	0	14	0	4	11	32	28	0	0	0	Bacteria	Planctomycetota	Planctomycetes	Gemmatales	Gemmataceae	NA	NA	CGTTGTTCGGAATCACTGGGCTTAAAGGGCGCGTAGGCGGGTCATCAAGTCCGGGGTGAAATCCTCCAGCTTAACTGGAGAATAGCCCTGGATACGGGTGGTCTCGAGGGAGGTAGGGGCAGTTGGAACTTCCGGTGGAGCGGTGAAATGCGTTGATATCGGAAGGAACGCCGGTGGCGAAAGCGAACTGCTGGGCCTCTTCTGACGCTGAGGCG
ASV_403	0	0	0	0	0	0	0	0	0	0	0	0	0	0	0	0	0	0	151	87	12	Bacteria	Deinococcota	Deinococci	Thermales	Thermaceae	Thermus	NA	CGTTACCCGGATTTACTGGGCGTAAAGGGCGTGTAGGCGGTTTGGCGCGTCTGGCGTTAAAGACCACGGCTCAACCGTGGGGGTGCGCTGGATACGGCCAAGCTAGACGGCTGGAGGGGGTGGTGGAATTCCCGGAGTAGCGGTGAAATGCGCAGATACCGGGAGGAACGCCGATAGCGAAGGCAGCCACCTGGCCAGTTTGTGACGCTGAGGCG
ASV_404	0	243	0	0	0	0	0	0	0	0	0	0	0	0	0	0	0	0	0	0	0	Bacteria	Actinobacteriota	Acidimicrobiia	IMCC26256	NA	NA	NA	TACGTAGGGGGCGAGCGTTGTCCGGATTTATTGGGCGTAAAGAGCTCGTAGGCGGTTCGGTAAGTCGGGTGTGAAATCTCCACGCTCAACGTGGAGGGGCCACTCGATACTGCCGTGACTCGAGTCCGGTAGAGGAGTGTGGAATTCCCGGTGTAGCGGTGAAATGCGCAGATATCGGGAGGAACACCAGTAGCGAAGGCGGCACTCTGGGCCGGAACTGACGCTGAGGAGCGAAAGCGTGGGGAG
ASV_405	0	0	43	11	0	98	6	0	11	0	0	19	0	38	0	0	0	0	14	0	0	Bacteria	NA	NA	NA	NA	NA	NA	CGTTGTCCGGATTCACTGGGCGTAAAGAGCTCGTAGGCGGCTACGGAAGTCGGCTGTGAAAGCCCGGGGCTCAACCCCGGGAGGCCAGTCGATACTCCGTGGCTAGAGGACGGCAGAGGGAGATGGAATTCCCGGTGTAGCGGTGAAATGCGCAGATATCGGGAGGAACACCAGTGGCGAAGGCGGTCTCCTGGGCCGTTCCTGACGCTGAGGAG
ASV_406	0	0	0	0	0	0	0	240	0	0	0	0	0	0	0	0	0	0	0	0	0	Bacteria	WPS-2	NA	NA	NA	NA	NA	CGTTATTCGGAATTATTGGGCGTAAAGCGCTCGTAGGCGGGACAGGAAGTCCGTGAAGAAAGACCTGGGCTCAACTCAGGGAACGGCACGGATACTCTTGTTCTTGAGGCAATCAGAGGATGATGGAATTCCCGGTGTAGCGGTGAAATGCGTAGATATCGGGAGGAACACCAGTGGCGAAGGCGATCATCTGGGGTTGTTCTGACGCTGAGGAG
ASV_407	0	239	0	0	0	0	0	0	0	0	0	0	0	0	0	0	0	0	0	0	0	Bacteria	Proteobacteria	Gammaproteobacteria	Xanthomonadales	Rhodanobacteraceae	Mizugakiibacter	NA	TACGGAGGGTGCAAGCGTTAATCGGAATTACTGGGCGTAAAGCGTGCGTAGGTGGTTCGCTAAGTCCGTTGTGAAAGCCCCGAGCTCAACTTGGGAATGGCAGTGGATACTGGCGAGCTGGAGTGCGGTAGAGGAAGGTGGAATTCCCGGTGTAGCGGTGAAATGCGTAGAGATCGGGAGGAACACCAGTGGCGAAGGCGGCCTTCTGGACCAGCACTGACACTCAAGCACGAAAGCGTGGGGAGC
ASV_408	0	0	0	0	52	0	0	0	0	36	0	0	13	0	0	7	33	98	0	0	0	Bacteria	Myxococcota	Polyangia	Haliangiales	Haliangiaceae	Haliangium	NA	CGTTGCTCGGAATCATTGGGCGTAAAGCGCACGTAGGCGGCTTGTTAAGTCGGGTGTGAAATCCCTCGGCTCAACCGAGGAAGTGCACTCGAAACTGGCAGGCTTGAATATGGAAGAGGGTCGCGGAATTCCCGGTGTAGAGGTGAAATTCGTAGATATCGGGAGGAACACCAGTGGCGAAGGCGGCGACCTGGGCCAATATTGACGCTGAGGTG
ASV_409	0	0	0	0	0	0	0	0	66	19	0	0	0	0	70	0	68	16	0	0	0	Bacteria	Cyanobacteria	Cyanobacteriia	Cyanobacteriales	Nostocaceae	Stigonema SAG 48.90	NA	ATGTGTCAGCGCCGCGGTAATACGGAGGATGCAAGCGTTATCCGGAATGATTGGGCGTAAAGCGTCCGCAGGTGGCAGTGAAAGTCTGCTGTTAAAGAGTCTGGCTCAACCAGATAAAGGCAGTGGAAACTACACAGCTAGAGTGCGTTCGGGGTAGAGGGAATTCCTGGTGGAGCGGTGAAATGCGTAGAGATCAGGAAGAACACCGGTGGCGA
ASV_410	0	0	0	0	4	0	0	0	57	0	26	0	0	0	64	59	15	13	0	0	0	Bacteria	Proteobacteria	Alphaproteobacteria	Rhizobiales	Xanthobacteraceae	NA	NA	CGTTGCTCGGAATTACTGGGCGTAAAGCGCACGTAGGCGGGTCGTTAAGTCGGGGGTGAAATCCTGGAGCTCAACTCCAGAACTGCCTCCGATACTGGCGACCTCGAGTCCGGGAGAGGTGAGTGGAACTGCGAGTGTAGAGGTGAAATTCGTAGATATTCGCAAGAACACCAGTGGCGAAGGCGGCTCACTGGCCCGGTACTGACGCTGAGGTG
ASV_411	0	0	0	0	0	0	0	0	0	0	0	0	236	0	0	0	0	0	0	0	0	Bacteria	Acidobacteriota	Blastocatellia	2024-11-01	NA	NA	NA	GCGTTGTTCGGAATTACTGGGCGTAAAGGGCGCGTAGGCGGCTCGTCAAGTCGGGCGTGAAATCTCCGGGCTTAACCCGGAAAAGTCGTTCGATACTGTTGAGCTAGAGTGTGGAAGGGGCTACTGGAATTCCGTGTGTAGCGGTGAAATGCGTAGATATACGGAGGAACACCAGCGGCGAAGGCGGGTAGCTGGGCCAACACTGACGCTGAGGC
ASV_412	72	163	0	0	0	0	0	0	0	0	0	0	0	0	0	0	0	0	0	0	0	Bacteria	Proteobacteria	Alphaproteobacteria	Reyranellales	Reyranellaceae	Reyranella	NA	GACGAAGGGGGCTAGCGTTGTTCGGAATTACTGGGCGTAAAGCGCGTGTAGGCGGTTGTTCAAGTCGGATGTGAAAGCCTTGAGCTCAACTCAAGAAATGCACTCGGTACTGGATGACTAGAGGACCGGAGAGGATAGTGGAATTCCCAGTGTAGTGGTGAAATACGTAGAGATTGGGAAGAACACCAGTGGCGAAGGCGGCTATCTGGACGGTTTCTGACGCTAAGACGCGAAAGCGTGGGGAGC
ASV_413	0	0	235	0	0	0	0	0	0	0	0	0	0	0	0	0	0	0	0	0	0	Archaea	Crenarchaeota	Nitrososphaeria	SCGC AB-179-E04	NA	NA	NA	TGTGCAGCGCCGCGGTAATACCAGCTCCCCGAGTGGTCGGGACGATTATTGGGCCTAAAGCATCCGTAGCCGGCTTCACAGGTCTCTTGTTAAATCCAACGGCTCAACCGTTGGACCGCAGGAGATACCATGGAGCTAGGGGGCGGGAGAGGCGGACGGTACTCCATGGGTAGGGGTAAAATCCTTTGATCCATGGAAGACCACCAGTGGCGAAG
ASV_415	0	0	0	0	0	0	0	235	0	0	0	0	0	0	0	0	0	0	0	0	0	Bacteria	Bacteroidota	Bacteroidia	Chitinophagales	Chitinophagaceae	NA	NA	GATGTGTCAGCGCCGCGGTAATACGGAGGGTGCAAGCGTTATCCGGATTCACTGGGTTTAAAGGGTGCGTAGGTGGGCAGGTAAGTCAGTGGTGAAATCTCCGAGCTTAACTCGGAAACTGCCGTTGATACTATTTGTCTTGAATATTGTGGAGGTAAGCGGAATATGTCATGTAGCGGTGAAATGCTTAGATATGACATAGAACACCAATTGCG
ASV_416	0	0	0	0	0	0	0	0	0	9	0	0	226	0	0	0	0	0	0	0	0	Bacteria	Planctomycetota	Planctomycetes	Gemmatales	Gemmataceae	NA	NA	CGTTGTTCGGAATCACTGGGCTTAAAGGGCGCGTAGGCGGGCAACCAAGTCAGGGGTGAAATCTTTCGGCTTAACCGGAAAACAGCCTCTGATACTGGTTGTCTCGAGGGAGGTAGGGGCATGTGGAACTTCCGGTGGAGCGGTGAAATGCGTTGATATCGGAAGGAACGCCGGTGGCGAAAGCGACGTGCTGGACCTCTTCTGACGCTGAGGCG
ASV_417	0	233	0	0	0	0	0	0	0	0	0	0	0	0	0	0	0	0	0	0	0	Bacteria	Chloroflexi	Ktedonobacteria	Ktedonobacterales	Ktedonobacteraceae	1921-2	NA	TACGTAGGGGGCGAGCGTTGTCCGGAGTACTGGGCGTAAAGCGTCCGCAGGCGGTTCTGCGCGTTTCCGGTGCCAGCCCGTTGCTTAACGGCGGGAGTGCCGGGAAGACGGCAGGACTCGAGGGCCTCAGAGGGACATAGAATTCCGGGTGGAGTGGTGAAATGCGTAGAGATCCGGAGGAATACCAATGGCGCAGGCAGTGTCCTGGGAGGCACTGACGCTGAGGGACGAAAGCCAGGGGAGCGA
ASV_418	0	0	0	32	0	0	0	114	0	0	0	0	0	84	0	0	0	0	0	0	0	Bacteria	Proteobacteria	Alphaproteobacteria	Acetobacterales	Acetobacteraceae	NA	NA	CGTTGCTCGGAATGACTGGGCGTAAAGGGCGCGTAGGCGGTTCGTACAGTCGGGCGTGAAATTCCTGGGCTCAACCTGGGGGCTGCGCTCGAGACGTATGGGCTAGAGTTTGGAAGAGGGTCGTGGAATTCCCAGTGTAGAGGTGAAATTCGTAGATATTGGGAAGAACACCGGTGGCGAAGGCGGCGACCTGGTCCTTGACTGACGCTGAGGCG
ASV_419	0	0	0	0	19	0	0	0	0	0	10	0	0	0	5	15	49	115	0	0	16	Bacteria	NA	NA	NA	NA	NA	NA	CGTTGTCCGGAGTACTGGGCGTAAAGCGTGGGTAGGCGGCTCGATGCGTCTGTGGTGAAATCTCCCAGCTTACCTGGGAGGGGGTCACGGATACGGTCGGGCTTGAGGGCATGAGAGGCAAGTAGAACTCCCGGTGGACCAGTGAAATGGGTAGAGATCGGGAAGAATACCAGTGGTGCAGACGGCTTGCTGGCGTGTACCTGACGCTGAGCCAC
ASV_421	0	0	0	0	63	0	0	0	0	41	21	0	0	0	0	30	0	30	0	0	41	Bacteria	Proteobacteria	Alphaproteobacteria	Rhizobiales	Xanthobacteraceae	NA	NA	CGTTGCTCGGAATCACTGGGCGTAAAGCGCACGTAGGCGGACTTTTAAGTCGGAGGTGAAATCCTGGAGCTCAACTCCAGAACTGCCTTCGATACTGAGAGTCTTCGAGTTCGGGAGAGGTGAGTGGAACTGCGAGTGTAGAGGTGAAATTCGTAGATATTCGCAAGAACACCAGTGGCGAAGGCGGCTCACTGGCCCGATACTGACGCTGAGGT
ASV_422	0	0	11	0	0	191	23	0	0	0	0	0	0	0	0	0	0	0	0	0	0	Bacteria	Chloroflexi	JG30-KF-CM66	NA	NA	NA	NA	CGTTGTCCGGATTTATTGGGCGTAAAGCGCGCGCAGGCGGTCCGTTTAGTCCGAGGTAAAATCTCCCGGCTCAACTGGGAGGGGTCTTCGGATACTGGCGGACTGGAGGAGAGCAGAGGTGAGCGGAATTCTCGGTGTAGTGGTGAAATGCGTAGATATCGAGAGGAACACCAGTGGCGAAGGCGGCTCACTGGGCTCCACCTGACGCTGAGGCG
ASV_423	0	0	0	32	0	0	192	0	0	0	0	0	0	0	0	0	0	0	0	0	0	Bacteria	Acidobacteriota	Acidobacteriae	Acidobacteriales	Acidobacteriaceae (Subgroup 1)	Granulicella	NA	CGTTGTTCGGATTTATTGGGCGTAAAGGGTGCGTAGGCGGTTTGGCAAGTCTTGTGTGAAATCTTCGGGCTCAACCCGAAGCCTGCATAAGAAACTGCCGGGCTTGAGTATGGGAGAGGTGAGTGGAATTTCCGGTGTAGCGGTGAAATGCGTAGATATCGGAAGGAACACCTGTGGCGAAAGCGGCTCACTGGACCATAACTGACGCTGAGGCA
ASV_424	0	0	0	0	0	0	0	0	0	0	20	0	0	0	0	6	22	176	0	0	0	Bacteria	Gemmatimonadota	Gemmatimonadetes	Gemmatimonadales	Gemmatimonadaceae	NA	NA	CGTTGTCCGGAATCACTGGGCGTAAAGGGCGCGTAGGTGGCGGGATAAGCGTGTGGTGAAAGCTCGGAGCTCAACTCCGAGTCTGCCATGCGGACTGTCTTGCTCGAGCGTAGTAGAGGCAGGTGGAATTCCGGGTGTAGCGGTGGAATGCGTAGAGATCCGGAAGAACACCGGTGGCGAAGGCGGCCTGCTGGGCTACTGCTGACACTGAGGCG
ASV_425	0	223	0	0	0	0	0	0	0	0	0	0	0	0	0	0	0	0	0	0	0	Bacteria	NA	NA	NA	NA	NA	NA	TACGTAGGGGGCAAGCGTTACCCGGATTTACTGGGCGTAAAGCGCGTGTAGGTGGTTGGTTAAGCGTGATGTGAAAGCTTCCGGCTCAACCGGAAAACTGCATTGCGAACTGGCTGACTTGAGGACAGGAGAGGGAAGCGGAATTCCCGGTGTAGCGGTGAAATGCGTAGATATCGGGAGGAACACCAGAGGCGAAGGCGGCTTTCTGGCCTGAACCTGACACTGAGACGCGAAAGCGTGGGGAGC
ASV_426	0	221	0	0	0	0	0	0	0	0	0	0	0	0	0	0	0	0	0	0	0	Bacteria	Chloroflexi	Ktedonobacteria	Ktedonobacterales	Ktedonobacteraceae	1921-2	NA	GACGTAGGGGGCGAGCGTTGTCCGGAGTTACTGGGCGTAAAGGGCACGCAGGCGGTCTGCCACGTTGCCATGACAGGGTCGGGCTTCACTCGACCAGGAGGGCAAAAACGAGCGGACTTGAGGCTTGGAGAGGGACCTGGAATTCCGGGTGGAGTGGTGAAATGCGTAGAGATCCGGAGGAACACCGAAGGCGAAGGCAGGGTCCTGGCCAAGAACTGACGCTGAGGTGCGAAAGCCAGGGGAGCG
ASV_427	0	0	10	0	0	4	145	0	0	0	0	30	0	31	0	0	0	0	0	0	0	Bacteria	Chloroflexi	Chloroflexia	Elev-1554	NA	NA	NA	CGTTGTCCGGAATTACTGGGCGTAAAGAGCGCGTAGGCGGGCGGGTACATCCCCCGTGAAAGCCCCTGGCTCAACTAGGGGAGGCCGGGGGAGATGGCCGGCCTGGAGGGTGGTAGAGGCAGGTGGAAGTCCCGAAGTAGTGGTGAAATGCGTAGAGATCGGGAGGAACACCAGTGGCGAAGGCGGCCTGCTGGGCCACGCCTGACGCTGAGGCG
ASV_428	0	0	0	0	185	0	0	0	13	0	8	0	14	0	0	0	0	0	0	0	0	Bacteria	Chloroflexi	Ktedonobacteria	B12-WMSP1	NA	NA	NA	CGTTGTCCGGAATTACTGGGCGTAAAGAGCGCGTAGGCGGCATGGTACGACACGTGTGAAAGCCCCCGGCTCAACTGGGGAGGGTCACGTGTAACGGCCGAGCTTAATGAGTGTAGGAGAGGGAAGTGGAACTCCGGGAGTAGCGGTGAAATGCGTAGATACCCGGAGGAACACCAGTGGCGAAGGCGGCTTCCTGGTCTACAACTGACGCTGTG
ASV_429	0	0	0	74	0	0	9	35	0	0	0	0	0	101	0	0	0	0	0	0	0	Bacteria	Proteobacteria	Alphaproteobacteria	Acetobacterales	Acetobacteraceae	NA	NA	CGTTGCTCGGAATGACTGGGCGTAAAGGGCGCGTAGGCGGATGACATAGTCAGGCGTGAAATTCCCGGGCTCAACCTGGGGGCTGCGCTTGATACGTGTCGTCTTGAGTGAGGAAGAGGGTCGTGGAATTCCCAGTGTAGAGGTGAAATTCGTAGATATTGGGAAGAACACCGGTGGCGAAGGCGGCGACCTGGTCCTTTACTGACGCTGAGGCG
ASV_430	0	0	0	38	0	64	74	0	0	0	0	41	0	0	0	0	0	0	0	0	0	Bacteria	Verrucomicrobiota	Verrucomicrobiae	Chthoniobacterales	Chthoniobacteraceae	Candidatus Udaeobacter	NA	CGTTGTTCGGATTCATTGGGCGTAAAGGGTGCGTAGGCGGCGCGGTAAGTCGGGTGTGAAATCTCGGAGCTTAACTCCGAAACTGCATTCGATACTGCCGCGCTCGAGGACTGGAGAGGAGACTGGAATTCACGGTGTAGCGGTGAAATGCGTAGATATCGTGAGGAAGACCAGTGGCGAAGGCGGGTCTCTGGACAGGTCCTGACGCTGACGGC
ASV_431	0	216	0	0	0	0	0	0	0	0	0	0	0	0	0	0	0	0	0	0	0	Bacteria	Planctomycetota	Planctomycetes	Gemmatales	Gemmataceae	NA	NA	GACGAACCGTGCGAACGTTGTTCGGAATCACTGGGCTTAAAGGGCGCGTAGGCGGTCTCCCAAGTCTGGGGTGAAATCGTTCGGCTCAACCGGACCAGGGCCTTGGATACTGGGAGACTCGAGGGAGGTAGGGGCAGGTGGAACTTCCGGTGGAGCGGTGAAATGCGTTGATATCGGAAGGAACGCCGGTGGCGAAAGCGGCCTGCTGGACCTCATTCTGACGCTGAGGCGCGAAAGCTAGGGTAG
ASV_432	0	0	0	0	186	0	0	0	0	10	4	0	15	0	0	0	0	0	0	0	0	Bacteria	Chloroflexi	Ktedonobacteria	Ktedonobacterales	JG30-KF-AS9	NA	NA	CGTTGTCCGGAGTTACTGGGCGTAAAGGGTGCGCAGGCGGCCGCGAACGTTTGGGATGAAATCTCCCCGCTCACCGGGGAGGGGGTTTCGAATACGGCGCGGCTTGAGGCTCGGAGAGGGGCGTGGAATTCCGGGTGGAGCGGTGAAATGCGTAGAGATCCGGAGGAACACCGACGGCGTAAGCAGCGCCCTGGACGAGATCTGACGCTCGGGCA
ASV_433	213	0	0	0	0	0	0	0	0	0	0	0	0	0	0	0	0	0	0	0	0	Archaea	Crenarchaeota	Nitrososphaeria	Nitrososphaerales	Nitrososphaeraceae	Candidatus Nitrososphaera	NA	TACCAGCACCCCGAGTGGTCGGGACGATTATTGGGCCTAAAGCATCCGTAGCCGGTTCTGCAAGTCTTCCGTTAAATCCACCTGCTCAACAGATGGGCTGCGGGGGATACTACAGGGCTAGGAGGCGGGAGAGGCAAGCGGTACTCAGTGGGTAGGGGTAAAATCCTCTGATCCACTGAAGACCACCAGTGGCGAAGGCGGCTTGCCAGAACGCGCTCGACGGTGAGGGATGAAAGCTGGGGGAGC
ASV_434	0	0	8	50	0	0	12	11	0	0	0	29	0	103	0	0	0	0	0	0	0	Bacteria	Firmicutes	Sulfobacillia	Sulfobacillales	Sulfobacillaceae	NA	NA	CGTTGTCCGGAATGACTGGGCGTAAAGGGCGTCTAGGCGGCACGTCGCGTCGGGAGTGAAAGGCGCGGGCTCAACCCGCGGAGTGCTTTCGAAACGGGCGAGCTAGAGGGCCGGAGAGGGAAGCGGAATTGCCGGTGTAGCGGTGAAATGCGTAGAGATCGGCAGGAACACCAGTGGCGAAGGCGGCTTCCTGGACGGTACCTGACGCTGAAGCG
ASV_435	0	0	0	89	0	0	0	80	0	0	0	0	0	30	0	0	0	0	12	0	2	Bacteria	Deinococcota	Deinococci	Deinococcales	Deinococcaceae	Deinococcus	NA	CGTTACCCGGAATCACTGGGCGTAAAGGGCGTGTAGGCGGCACTCCAAGTCTGGCTTTAAAGACCGAAGCTCAACTTCGGGACTGGGCCGGAAACTGGAGCGCTAGACGGATGGAGAGGTTACTGGAATTCCTGGTGTAGCGGTGGAATGCGTAGATACCAGGAGGAACACCAACGGCGAAGGCAGGTAACTGGACATTTTGTGACGCTGAGGCG
ASV_436	0	212	0	0	0	0	0	0	0	0	0	0	0	0	0	0	0	0	0	0	0	Bacteria	Chloroflexi	Ktedonobacteria	Ktedonobacterales	Ktedonobacteraceae	NA	NA	TACGTAGGGGGCGAGCGTTGTCCGGATTTATTGGGCGTAAAGGGCACGCAGGCGGTCTGCCGCATTCGCGGTGACAGTTTTCGGCTTCCCTGAGAAAGGGTCGCGACGATGGGCAGACTTGAGGACCAGAGAGGAAACGGGAACTCCGGGTGGAGTGGTGAAATGCGTAGATATCCGGAAGAACACCCATGGCGAAGGCACGTTTCTGGCTGGTTACTGACGCTCAGGTGCGAAAGCCAGGGGAGC
ASV_437	0	212	0	0	0	0	0	0	0	0	0	0	0	0	0	0	0	0	0	0	0	Bacteria	Chloroflexi	Ktedonobacteria	Ktedonobacterales	JG30-KF-AS9	NA	NA	TACGTAGGAGACAAGCGTTGTCCGGAATTATTGGGCGTAAAGGGCGCGCAGGCGGCCTGCCGCGTGTCTGGTGAAAGCGCCCGGCTTAACCGGGCGAGGTCCAGGCAAACGGGCAGGCTTGAGCGTCGGAGAGGGGCATGGAACTCCGGGTGGAGCGGTGAAATGCGTAGAGATCCGGAAGAACACCCATGGCGAAGGCAGTGCCCTGGCCGACGGCTGACGCTCAGGCGCGAAAGCGTGGGGAGC
ASV_438	0	0	0	0	0	0	0	0	15	102	94	0	0	0	0	0	0	0	0	0	0	Bacteria	WPS-2	NA	NA	NA	NA	NA	CGTTGTCCGGAATCATTGGGCGTAAAGCGCTCGTAGGCGGATCAGTAAGTCTGTGAAGAAAGACCCGGGCTCAACTCGGGGAACGGCATGGATACTATTGATCTTGAGGTAATCAGAGGATGATGGAATTCCCGGTGTAGCGGTGAAATGCGTAGATATCGGGAGGAACACCAGTGGCGAAGGCGATCATCTGGGGTTATTCTGACGCTGAGGAG
ASV_439	0	0	0	0	0	0	0	89	0	0	0	0	0	121	0	0	0	0	0	0	0	Bacteria	Actinobacteriota	Actinobacteria	Frankiales	NA	NA	NA	CGTTGTCCGGAATTATTGGGCGTAAAGAGCTCGTAGGCGGTCTGTCGCGTCGGCTGTGAAAACCGGAGGCTCAACCTCCGGCCTGCAGTCGATACGGGCAGACTAGAGTTCGGTAGGGGAGACTGGAATTCCTGGTGTAGCGGTGAAATGCGCAGATATCAGGAGGAACACCGGTGGCGAAGGCGGGTCTCTGGGCCGAAACTGACGCTGAGGAG
ASV_440	0	0	0	0	0	0	0	0	0	0	0	0	0	0	0	0	128	82	0	0	0	Bacteria	WPS-2	NA	NA	NA	NA	NA	CGTTATTCGGAATTATTGGGCGTAAAGCGCTCGTAGGCGGGACAGGAAGTCCGTGTTGAAAGACCTCGGCTCAACTGAGGGACCGGCGCGGATACTCTTGTTCTTGAGGCAATCAGAGGGTGATGGAATTCCCGGTGTAGCGGTGAAATGCGTAGATATCGGGAGGAACACCAGTGGCGAAGGCGATCACCTGGGGTTGTTCTGACGCTGAGGAG
ASV_441	0	0	0	0	0	0	3	0	6	87	59	0	54	0	0	0	0	0	0	0	0	Bacteria	Chloroflexi	Ktedonobacteria	Ktedonobacterales	Ktedonobacteraceae	NA	NA	CGTTGTCCGGAGTTACTGGGCGTAAAGCGCCCGCAGGCGGTCAGGCAAGTTCAGACTGACAATCCCCAGCTTAACTGGGGAGGGTGTATGAAAACTGCGTGACTTGAGGGACAGAGAGGGACATGGAATTCCGGGTGGAGTGGTGAAATGCGTAGATATCCGGAGGAACACCAAAGGCGAAGGCAATGTCCTGGCTGTTACCTGACGCTGAGGGG
ASV_442	0	0	0	0	0	0	0	0	0	0	0	0	208	0	0	0	0	0	0	0	0	Bacteria	Actinobacteriota	Thermoleophilia	Gaiellales	NA	NA	NA	CGTTGTCCGGATTTATTGGGCGTAAAGAGCGTGTAGGCGGCCAGGTAGGTCCGTTGTGAAAACTCGAGGCTCAACCTCGAGACGTCGGCGGAAACCCTTTGGCTAGAGTCCGGAAGAGGAGAGTGGAATTCCTGGTGTAGCGGTGAAATGCGCAGATATCAGGAAGAACACCCGTGGCGAAGGCGGCTCTCTGGGACGGTACTGACGCTGAGACG
ASV_443	0	0	94	0	0	22	0	0	0	0	0	0	0	0	0	0	0	0	90	0	0	Bacteria	Deinococcota	Deinococci	Thermales	Thermaceae	Thermus	NA	CGTTACCCGGATTTACTGGGCGTAAAGGGCGTGTAGGCGGTTTGGCGCGTCTGGCGTTAAAGACCGCGGCTCAACCGTGGGGGTGCGCTGGATACGGCCAAGCTAGACGGCTGGAGGGGGTGGTGGAATTCCCGGAGTAGCGGTGAAATGCGCAGATACCGGGAGGAACGCCGATAGCGAAGGCAGCCACCTGGCCAGTTTGTGACGCTGAGGCG
ASV_444	0	0	0	37	0	0	0	71	0	0	0	2	0	95	0	0	0	0	0	0	0	Bacteria	Chloroflexi	Ktedonobacteria	B10-SB3A	NA	NA	NA	CGTTGTCCGGAATTACTGGGCGTCAAGCGCGTGTAGGCGGGTCAGCAGGCGGCGTGTGAAAGGCGGGGGCTCAACCCCTGGAGGACGCGCCGAACCGTTGGTCTTGGGACGGCGAGGGGCATCTGGAATGGTCGGAGGAGCGGTGAAATGCGTAGAGCCCGATCAGAACACCGGTGGCGAAGGCGGGGTGCTGGAGCCGGGCCGACGCTGAGACG
ASV_445	204	0	0	0	0	0	0	0	0	0	0	0	0	0	0	0	0	0	0	0	0	Bacteria	NA	NA	NA	NA	NA	NA	TACGTAGGGGGCAAGCGTTGTCCGGATTTACTGGGCGTAAAGCGCGTGTAGGCGGCTTGTTAGGTCCTTTCGTGAAAGGCAGGGGCTCAACCCCTGGAGCGCGAGGGAAACCGGCGGGCTGGAGAGAGGCAGAGGAAGGTGGAACGGTCGGTGGAGCGGTGAAATGCGTAGAGATCGATCAGAACACCCATGGCGAAGGCAGCCTTCTGGGCCTCATCTGACGCTGTGACGCGAAAGCGTGGGGAG
ASV_446	0	0	0	0	125	0	0	0	0	0	11	0	40	0	0	0	0	28	0	0	0	Bacteria	Planctomycetota	Planctomycetes	Gemmatales	Gemmataceae	NA	NA	CGTTGTTCGGAATCACTGGGCTTAAAGGGCGCGTAGGCGGCTCGCGAGGTCGGGGGTGAAATCCCGCAGCTTAACTGCGGAAGTGCCTTCGATACCGGCGGGCTGGAGGAGGGTAGGGGTGCGCGGAACTTCTGGTGGAGCGGTGAAATGCGTTGATATCAGAAGGAACGCCGGCGGCGAAAGCGGCGCACTGGACCCTTTCTGACGCTGAGGCG
ASV_447	0	0	0	0	0	0	0	0	0	0	0	0	0	0	0	0	126	78	0	0	0	Bacteria	Acidobacteriota	Acidobacteriae	Solibacterales	Solibacteraceae	Candidatus Solibacter	NA	CGTTGTTCGGAGTTACTGGGCGTAAAGGGTGTGTAGGCGGTTCTCTAAGTTTGGTGTGAAATCTCCCGGCTCAACCGAGAGGGTGCGCCGAAAACTGGAGAGCTAGAGTGCGGGAGGGGAGAGTGGAATTCCTGGTGTAGCGGTGAAATGCGTAGATATCAGGAGGAACACCGGTGGTGTAGACGGCTCTCTGGACCGTAACTGACGCTGAGACA
ASV_448	0	0	0	0	25	0	0	0	4	116	55	0	3	0	0	0	0	0	0	0	0	Bacteria	Bacteroidota	Bacteroidia	Cytophagales	Hymenobacteraceae	Hymenobacter	NA	CGTTGTCCGGATTTATTGGGTTTAAAGGGTGCGTAGGTGGCCCTGTAAGTCCGTGGTGAAAGCCTCTCGCTCAACGAGAGAACTGCCATGGATACTGCAGGGCTTGAGGGTAGACGAGGTTGGCGGAATGGACGGTGTAGCGGTGAAATGCATAGATACCGTCCAGAACCCCGATTGCGTAGGCAGCTGACTAGGCTACACCTGACACTGAGGCA
ASV_449	0	0	0	0	20	0	0	0	110	0	23	0	5	0	15	0	0	5	0	14	10	Bacteria	Planctomycetota	Planctomycetes	Gemmatales	Gemmataceae	NA	NA	CGTTGTTCGGAATCACTGGGCTTAAAGGGCGCGTAGGCGGGTCACCAAGTCCGGGGTGAAATCTTTCGGCTTAACCGGAAAACTGCCTTGGATACTGGTGATCTTGAGGGAGGTAGGGGTCTGCGGAACTTCTGGTGGAGCGGTGAAATGCGTTGATATCAGAAGGAACGCCGGTGGCGAAAGCGGCGGACTGGACCTTCACTGACGCTGAGGCG
ASV_451	0	0	0	0	4	17	5	0	15	62	9	0	6	0	12	23	0	0	7	5	36	Bacteria	Chloroflexi	TK10	NA	NA	NA	NA	CGTTGTCCGGATTTATTGGGCGTAAAGCGCGCGTAGGCGGTGCCGCAAGTCGGCCGTGAAATCGCTCAGCTCAACTGGGCGGGGTCGGGCGAGACTGCGGGGCTGGAGGCAGGCAGAGGGCCGTGGAATTCCGGGTGTAGTGGTGGAATGCGTAGAGATCCGGAGGAACACCAGTGGCGAAGGCGGCGGCCTGGGCCTGACCTGACGCTGAGGCG
ASV_452	0	0	158	0	0	42	0	0	0	0	0	0	0	0	0	0	0	0	0	0	0	Bacteria	Cyanobacteria	Cyanobacteriia	Cyanobacteriales	Nostocaceae	Fischerella PCC-9339	NA	CGTTATCCGGAATGATTGGGCGTAAAGCGTCCGCAGGTGGTTGTGTGTGTCTATTGTCAAAGGGTCATGCTTAACATGATAAAGGCAGTGGAAACTACACGACTAGAGTGCGTTCGGGGCAGAGGGAATTCCTGGTGTAGCGGTGAAATGCGTAGAGATCAGGAAGAACACCGGTGGCGAAAGCGCTCTGCTAGGCCGCAACTGACACTGAGGAC
ASV_453	0	0	0	0	0	0	0	74	0	0	0	0	0	122	0	0	0	0	0	0	0	Bacteria	Planctomycetota	Planctomycetes	Isosphaerales	Isosphaeraceae	NA	NA	CGTTATTCGGAATCACTGGGCTTAAAGCGCGTGTAGGCGGCCGGCACGTCGACGGCTGAAATCCCCCGGCTTAACCGGGGAACGGGCCTCGATACGACCGGCCTTGAGGGGCGTAGGGGGATCGGGAACTTCCGGTGGAGCGGTGAAATGCGTTGAGATCGGAAGGAACGCCCGTGGCGAAAGCGCGGTCCTGGACGCCTACTGACGCTGAGACG
ASV_454	0	0	0	22	0	0	169	4	0	0	0	0	0	0	0	0	0	0	0	0	0	Bacteria	Actinobacteriota	Actinobacteria	Micrococcales	Intrasporangiaceae	Knoellia	NA	CGTTGTCCGGAATTATTGGGCGTAAAGAGCTTGTAGGCGGTTTGTCGCGTCTGCTGTGAAAATCCGGGGCTCAACCCCGGACTTGCAGTGGGTACGGGCAGACTAGAGTGTGGTAGGGGAGACTGGAATTCCTGGTGTAGCGGTGAAATGCGCAGATATCAGGAGGAACACCGATGGCGAAGGCAGGTCTCTGGGCCACTACTGACGCTGAGAAG
ASV_455	0	0	0	0	0	0	0	0	0	0	0	0	0	0	22	0	0	0	134	38	0	Bacteria	Firmicutes	NA	NA	NA	NA	NA	CGTTGTCCGGAATTACTGGGCGTAAAGGGCGTGTAGGCGGCTAGGTACGTCTTCAGGGAAATCCGCCGGCTCAACCGGTGGGGTGCTGGGGAAACGGCCTAGCTTGAGGGCAGGAGAGGGAAGCGGAATTCCCGGTGTAGCGGTGAAATGCGTAGAGATCGGGAGGAACACCCGTGGCGAAGGCGGCTTCCTGGACTGTGCCTGACGCTGAAGCG
ASV_456	0	0	35	58	0	3	63	19	0	0	0	0	0	15	0	0	0	0	0	0	0	Bacteria	Proteobacteria	Alphaproteobacteria	Acetobacterales	Acetobacteraceae	NA	NA	CGTTGCTCGGAATGACTGGGCGTAAAGGGCGCGTAGGCGGCTCATACAGTCAGGCGTGAAATTCCTGGGCTCAACCTGGGGACTGCGCTTGAGACGTGTGGGCTTGAGTGGGGAAGAGGGTCGTGGAATTCCCAGTGTAGAGGTGAAATTCGTAGATATTGGGAAGAACACCGGTGGCGAAGGCGGCGACCTGGTCCTTGACTGACGCTGAGGCG
ASV_457	0	0	0	0	52	0	0	0	35	0	0	0	0	0	0	0	45	61	0	0	0	Bacteria	Proteobacteria	Alphaproteobacteria	Caulobacterales	Caulobacteraceae	NA	NA	CGTTGCTCGGAATTACTGGGCGTAAAGGGCGCGTAGGCGGATGCTTAAGTCAGAGGTGAAAGCCCAGGGCTCAACCTTGGAACTGCCTTTGATACTGGGCATCTTGAGTATGGGAGAGGTGAGTGGAACTCCGAGTGTAGAGGTGAAATTCGTAGATATTCGGAAGAACACCAGTGGCGAAGGCGACTCACTGGCCCATTACTGACGCTGAGGCG
ASV_458	0	0	0	0	0	0	0	0	56	9	10	0	0	0	15	36	19	17	0	0	30	Bacteria	Planctomycetota	Planctomycetes	Gemmatales	Gemmataceae	NA	NA	CGTTGTTCGGATTCACTGGGCTTAAAGGGCGCGTAGGCGGGCCACCAAGTCTGTGGTGAAAGCCCCCGGCTCAACCGGGGAAGTGCCGCGGATACTGGTGGTCTCGAGGGGTGTAGGGGCATGCGGAACTTCCGGTGGAGCGGTGAAATGCGTAGATATCGGAAGGAACGCCGGTGGCGAAAGCGGCGTGCTGGACACCTACTGACGCTGAGGCG
ASV_459	0	0	0	0	0	0	0	0	0	0	0	0	0	0	0	50	54	88	0	0	0	Archaea	Crenarchaeota	Nitrososphaeria	Nitrososphaerales	Nitrososphaeraceae	Candidatus Nitrososphaera	NA	TGGTCGGGACGATTATTGGGCCTAAAGCATCCGTAGCCGGTTCTGCAAGTCTTCCGTTAAATCCACCTGCTCAACAGATGGGCTGCGGAGGATACTACAGGGCTAGGAGGCGGGAGAGGCAAGCGGTACTCAGTGGGTAGGGGTAAAATCCTCTGATCCACTGAAGACCACCAGTGGCGAAGGCGGCTTGCCAGAACGCGCTCGACGGTGAGGGA
ASV_460	0	0	0	0	111	0	0	0	23	0	57	0	0	0	0	0	0	0	0	0	0	Bacteria	NA	NA	NA	NA	NA	NA	CGTTGTTCGGAATTACTGGGCGTAAAGCGTGCGTAGGCGGACTTATAAGTCAAGGTTGAAATATCCGGGCTCAACTCGGGGCACGGCCTTGATACTGCAAGTCTTGAGTCAAGTAGAGGGTAATGGAATTCCCGGTGTAGCGGTGAAATGCGTAGATATCGGGAGGAACACCAGTGGCGAAGGCGGTTACCTGGGCTTGTTCTGACGCTGAGGCA
ASV_461	0	0	0	2	0	26	11	0	0	57	11	9	30	5	0	5	0	0	0	22	12	Bacteria	Dadabacteria	Dadabacteriia	Dadabacteriales	NA	NA	NA	CGTTGCTCGGATTTACTGGGCGTAAAGGGTCCGTAGGTGGCTCTGTAAGTTAGATGTGAAATCTCAGGGCTTAACCCTGAAATTGCATCTAAAACTGCGGAGCTTGAGTTCGGAAGAGGTTGGCGGAATTCCCGGTGTAGCGGTGAAATGCGTAGATATCGGGAGGAACACCAGTGGCGAAGGCGGCCAACTGGTCCGACACTGACACTGAGGGA
ASV_462	0	0	0	0	141	0	0	0	0	0	4	0	45	0	0	0	0	0	0	0	0	Bacteria	Myxococcota	Myxococcia	Myxococcales	Myxococcaceae	NA	NA	CGTTGTTCGGAATTATTGGGCGTAAAGCGCGAGTAGGCGGCTTTGCAAGTCGGGTGTGAAAGCCCTTGGCTCAACCAAGGAAGTGCGCCCGAAACTGCATAGCTCGAGTACCGGAGAGGATGGCGGAATTCCCGAAGTAGAGGTGAAATTCGTAGATATCGGGAGGAACACCGGTGGCGAAGGCGGCCATCTGGACGGATACTGACGCTGAGACG
ASV_463	0	0	0	0	74	0	0	0	0	26	52	0	37	0	0	0	0	0	0	0	0	Bacteria	Proteobacteria	Gammaproteobacteria	Burkholderiales	Comamonadaceae	Piscinibacter	NA	CGTTAATCGGAATTACTGGGCGTAAAGCGTGCGCAGGCGGCTTTGCAAGACAGATGTGAAATCCCCGGGCTTAACCTGGGAACTGCATTTGTGACTGCATGGCTGGAGTGCGGCAGAGGGGGATGGAATTCCGGCATGTAGCAGTGAAATGCGTAGATATGCGGAGGAACACCGATGGCGAAGGCAATCCCCTGGGCCTGCACTGACGCTCATGC
ASV_464	0	0	0	0	5	0	0	0	0	0	0	0	0	0	0	0	0	0	0	0	181	Bacteria	Proteobacteria	Alphaproteobacteria	Elsterales	URHD0088	NA	NA	CGTTGTTCGGAATTACTGGGCGTAAAGGGCGCGCAGGCGGCCAAGTAAGTCAGATGTGAAAGCCCCGGGCTCAACCTGGGAATAGCATTTGGGACTGTTTGGCTAGAGATCGGGAGAGGAGAGTGGAATTCCCAGTGTAGAGGTGAAATTCGTAGATATTGGGAAGAACACCGGTGGCGAAGGCGGCTCTCTGGACCGATACTGACGCTGAGGCG
ASV_465	0	0	0	0	0	0	0	0	59	9	16	0	0	0	11	47	20	23	0	0	0	Bacteria	WPS-2	NA	NA	NA	NA	NA	CGTTGTTCGGAATTATTGGGCGTAAAGCGCTCGTAGGCGGGACAGGTAGTCCGTGAAGAAAGACCTCGGCTCAACTGAGGGAACGGCACGGATACTCTTGTTCTTGAGGCAATCAGAGGGTGATGGAATTCCCGGTGTAGCGGTGAAATGCGTAGATATCGGGAGGAACACCAGTGGCGAAGGCGATCACCTGGGGTTGTTCTGACGCTGAGGAG
ASV_466	0	0	0	0	0	0	0	0	0	0	0	0	0	0	0	0	132	51	0	0	0	Bacteria	Acidobacteriota	Acidobacteriae	Acidobacteriales	NA	NA	NA	CGTTGTTCGGAATTATTGGGCGTAAAGGGCGCGTAGGCGGTGCGGTAAGTCACCTGTGAACCCTCTAGGCTTAACCTAGAGCCTGCAGGCGAAACTGCCGTGCTTGAGGGTGGGAGAGGTGCGTGGAATTCCCGGTGTAGCGGTGAAATGCGTAGATATCGGGAGGAACACCTGTGGCGAAAGCGGCGCACTGGACCACTTCTGACGCTGAGGCG
ASV_467	0	180	0	0	0	0	0	0	0	0	0	0	0	0	0	0	0	0	0	0	0	Bacteria	Actinobacteriota	Thermoleophilia	Solirubrobacterales	Solirubrobacteraceae	Conexibacter	NA	TACGTAGGGGGCAAGCGTTGTCCGGAATCATTGGGCGTAAAGAGCGTGTAGGCGGCTCGGTAAGTCCGCTGTGAAAGTCCAGGGCTCAACCCTGGAATGCCGGTGGAAACTGCTGGGCTAGAGTCCGGAAGGGGTGAGTGGAATTCCTGGTGTAGCGGTGAAATGCGCAGATATCAGGAGGAACACCAATGGCGAAGGCAGCTCACTGGGACGGTACTGACGCTGAGACGCGAAAGCGTGGGGAGC
ASV_468	0	0	0	0	93	0	0	0	25	0	0	0	0	0	0	0	0	62	0	0	0	Bacteria	Actinobacteriota	Thermoleophilia	Solirubrobacterales	Solirubrobacteraceae	Conexibacter	NA	CGTTGTCCGGAATCATTGGGCGTAAAGAGCGTGTAGGCGGCTCGGTAAGTCCGCTGTAAAAGTCCAGGGCTCAACCCTGGAAAGCCGGTGGAAACTGTCGAGCTAGAGTCCGGAAGAGGCGAGTGGAATTCCTGGTGTAGCGGTGAAATGCGCAGATATCAGGAGGAACACCAATGGCGAAGGCAGCTCGCTGGGACGGTACTGACGCTGAGACG
ASV_469	0	0	0	0	35	0	0	0	0	0	13	0	24	0	0	0	0	90	0	0	18	Bacteria	Chloroflexi	Anaerolineae	SBR1031	A4b	NA	NA	CGTTATCCGGATTTACTGGGCGTAAAGGGTGTGCAGGCGGGTCGACAAGTCGTGTATGAAAGCCACTGGCTCAACCGGTGGAGGCTAGGCGAGACTGTCGGTCTAGAGTGTGTGAGAGGGACGTGGAATTCCGGGTGTAGTGGTGAAATGCGTAGAGATCCGGAGGAACACCAGAGGCGAAGGCGGCGTCCTGGCACACAACTGACGCTGAGACA
ASV_470	0	0	0	0	0	0	0	87	0	0	0	0	0	93	0	0	0	0	0	0	0	Bacteria	Actinobacteriota	Actinobacteria	Frankiales	Nakamurellaceae	Nakamurella	panacisegetis	CGTTGTCCGGAATTATTGGGCGTAAAGAGCTCGTAGGCGGTCTGTCGCGTCGAATGTGAAAATCCGAGGCTCAACCTCGGACCTGCATTCGATACGGGCAGACTAGAGTTCGGTAGGGGAGTCTGGAATTCCTGGTGTAGCGGTGAAATGCGCAGATATCAGGAGGAACACCGGTGGCGAAGGCGGGACTCTGGGCCGATACTGACGCTGAGGAG
ASV_471	0	178	0	0	0	0	0	0	0	0	0	0	0	0	0	0	0	0	0	0	0	Bacteria	Acidobacteriota	FFCH5909	NA	NA	NA	NA	TACGGGGGTGGCTAGCGTTGTTCGGAATTACTGGGCGTAAAGGGCGCGTAGGCGGCCTCGTAAGTCAGATGTGAAAGCCACAGGCTCAACCTGTGAATGGCATCTGAAACTACCTGGCTTGAGTTCCGGAGGGGAAGGTGGAATTCCCGGTGTAGCGGTGAAATGCGTAGATATCGGGAGGAACACCAGTGGCGAAGGCGGCCTTCTGGACGGATACTGACGCTGATGCGCGAAAGCTAGGGGAGC
ASV_472	0	0	0	0	0	0	0	0	0	0	0	0	174	0	0	0	0	0	0	0	4	Bacteria	Acidobacteriota	Holophagae	Subgroup 7	NA	NA	NA	CGTTATTCGGAATTATTGGGCGTAAAGGGCGCGTAGGCGGCCATGCGTGTCTTCCGTGAAATCCCTCGGCTTAACTGAGGACGTGCGGAAGAAACTGCAAGGCTCGAGTCCGGGAGAGGGGGGTGGAATTCCCAGTGTAGCGGTGAAATGCGTAGATATTGGGAGGAACACCGGTGGCGAAGGCGGCCCCCTGGACCGGTACTGACGCTGAGGCG
ASV_473	0	0	0	0	0	177	0	0	0	0	0	0	0	0	0	0	0	0	0	0	0	Archaea	Crenarchaeota	Nitrososphaeria	SCGC AB-179-E04	NA	NA	NA	GTGTCAGCGCCGCGGTAATACCAGCTCCCCGAGTGGTCGGGACGATTATTGGGCCTAAAGCATCCGTAGCCGGCTTCACAGGTCTCTTGTTAAATCCAACGGCTCAACCGTTGGACCGCAGGAGATACCATGGAGCTAGGGGGCGGGAGAGGCGGACGGTACTCCATGGGTAGGGGTAAAATCCTTTGATCCATGGAAGACCACCAGTGGCGAAG
ASV_474	0	175	0	0	0	0	0	0	0	0	0	0	0	0	0	0	0	0	0	0	0	Bacteria	Planctomycetota	Planctomycetes	Gemmatales	Gemmataceae	NA	NA	GACGAACCGTGCAAACGTTGTTCGGAATCACTGGGCTTAAAGGGCGCGTAGGCGGTCGACCAAGTCCGGGGTGAAATCTTTCGGCTTAACCGGAAAAGTGCCTTGGATACTGGCCGGCTGGAGGGAGGTAGGGGCAGGTGGAACTTCCAGTGGAGCGGTGAAATGCGTTGATATTGGAAGGAACGCCGGTGGCGAAAGCGACCTGCTGGACCTCTTCTGACGCTGAGGCGCGAAAGCTAGGGGAGC
ASV_475	0	0	7	10	0	32	101	0	0	0	0	13	0	11	0	0	0	0	0	0	0	Bacteria	Verrucomicrobiota	Verrucomicrobiae	Chthoniobacterales	Chthoniobacteraceae	Candidatus Udaeobacter	NA	TCGGAGCTTAACTCCGAAACTGCATTCGATACTGCCGCGCTCGAGGACTGGAGAGGAGACTGGAATTCACGGTGTAGCGGTGAAATGCGTAGATATCGTGAGGAAGACCAGTGGCGAAGGCGGGTCTCTGGACAGGTCCTGACGCTGAGGCACGAAGGCCAGGGGAGCAAACGGGATTAGATACCCCGGTAGTCCTGGCAGTAAACGGTGCACGT
ASV_476	0	0	0	7	0	0	0	12	0	0	0	13	0	142	0	0	0	0	0	0	0	Bacteria	Proteobacteria	Alphaproteobacteria	Acetobacterales	Acetobacteraceae	NA	NA	CGTTGCTCGGAATGACTGGGCGTAAAGGGCGCGTAGGCGGATGACATAGTCGGGCGTGAAATTCCTGGGCTTAACCTGGGGGCTGCGCTCGATACGTGTCGTCTCGAGTGAGGAAGAGGGTCGTGGAATTCCCAGTGTAGAGGTGAAATTCGTAGATATTGGGAAGAACACCGGTGGCGAAGGCGGCGACCTGGTCCTTTACTGACGCTGAGGCG
ASV_477	0	0	33	18	0	0	57	0	0	0	0	45	0	19	0	0	0	0	0	0	0	Bacteria	Actinobacteriota	Actinobacteria	Corynebacteriales	Mycobacteriaceae	Mycobacterium	NA	CGTTGTCCGGAATTACTGGGCGTAAAGAGCTCGTAGGTGGTTTGTCGCGTTGTTCGTGAAATCTCACGGCTTAACTGTGAGCGTGCGGGCGATACGGGCAGACTGGAGTACTGCAGGGGAGACTGGAATTCCTGGTGTAGCGGTGGAATGCGCAGATATCAGGAGGAACACCGGTGGCGAAGGCGGGTCTCTGGGCAGTAACTGACGCTGAGGAG
ASV_478	0	0	0	0	61	0	0	0	0	24	16	0	13	0	0	0	10	48	0	0	0	Bacteria	Planctomycetota	Planctomycetes	Gemmatales	Gemmataceae	NA	NA	CGTTGTTCGGAATCACTGGGCTTAAAGGGCGCGTAGGCGGGTCACCAAGTCCGGGGTGAAATCTTTCGGCTCAACCGGAAAAGTGCCTTGGATACTGGTGGTCTGGAGGGAGGTAGGGGCATGTGGAACTTCCGGTGGAGCGGTGAAATGCGTTGATATCGGAAGGAACTCCGGTGGCGAAAGCGACGTGCTGGACCTCTTCTGACGCTGAGGCG
ASV_479	0	0	0	0	0	0	37	0	60	12	0	0	0	0	0	33	30	0	0	0	0	Bacteria	Proteobacteria	Gammaproteobacteria	WD260	NA	NA	NA	CGTTAATCGGAATTACTGGGCGTAAAGCGCGCGTAGACGGTTTGGTAAGTCAGATGTGAAATCCCCGGGCTCAACCTGGGAACTGCATTTGATACTGCCTGGCTAGAGTATGGAAGAGGGAAGTGGAATTTCCGGTGTAGCGGTGAAATGCGTAGATATCGGAAGGAACACCAGTGGCGAAAGCGACTTCCTGGTCCAATACTGACGTTCATGTG
ASV_480	170	0	0	0	0	0	0	0	0	0	0	0	0	0	0	0	0	0	0	0	0	Bacteria	Planctomycetota	Planctomycetes	Gemmatales	Gemmataceae	NA	NA	GACGAACCGTGCAAACGTTACTCGGATTCACTGGGCTTAAAGGGCGCGTAGGCGGTCGGCCAAGTCTTCGGTGAAAGCCCCCGGCTCAACCGGGGAATTGCCGTGGATACTGGTCGGCTCGAGGGGGAAAGGGGCCGCGGGAACTACCGGTGGAGCGGTGAAATGCGTTGATATCGGTAGGAACGCCGGTGGCGAAGGCGCGCGGCTGGGTCCCTTCTGACGCTGAGGCGCGAAAGCTAGGGGAGC
ASV_481	0	0	3	0	0	8	0	0	0	0	0	0	0	0	0	0	0	0	0	17	142	Bacteria	Proteobacteria	Alphaproteobacteria	NA	NA	NA	NA	CGTTGTTCGGAATTACTGGGCGTAAAGGGCGCGTAGGCTGTGCTGTAAGTCAGGCGTGAAAGCCCCGGGCTCAACCTGGGAATTGCGCTTGATACTGCGGCGCTGGAAGGTGGGAGAGGATGGCGGAATTCCCAGTGTAGAGGTGAAATTCGTAGATATTGGGAAGAACACCGGTGGCGAAGGCGGCCATCTGGCCCACATTTGACGCTGAGGCG
ASV_482	0	169	0	0	0	0	0	0	0	0	0	0	0	0	0	0	0	0	0	0	0	Bacteria	Acidobacteriota	Acidobacteriae	Subgroup 2	NA	NA	NA	TACGTAGGGGGCCAGCGTTGCTCGGAATTACTGGGCGTAAAGGGTTCGTAGGCGGTGCGGCAAGTCGGGGGTGAAATCTTTGGGCTTAACCCAGAGGCTGCCTTCGAAACTGCCGTGCTCGAGTGCGGGAGAGGCGAGTGGAATTGCAGGTGTAGCGGTGAAATGCGTAGATATCTGCAGGAACACCCGGGGCGAAGGCGGCTCGCTGGACCGCAACTGACGCTGAGGAACGAAAGCTAGGGGAGC
ASV_483	0	0	0	21	0	78	34	0	0	0	0	7	0	29	0	0	0	0	0	0	0	Bacteria	Planctomycetota	Planctomycetes	Gemmatales	Gemmataceae	NA	NA	CGTTGTTCGGAATCACTGGGCTTAAAGGGCGCGTAGGCGGATCATCAAGTCAGGGGTGAAATCCCACGGCTCAACCGTGGAAGTGCCTTTGATACTGATGGTCTGGAGTGGGGTAGGGGCATGCGGAACTGGTGGTGGAGCGGTGAAATGCGTAGATATCACTAGGAACGCCGGTGGCGAAAGCGGCGTGCTGGACCCCAACTGACGCTGAGGCG
ASV_484	0	0	0	0	63	0	0	0	9	26	44	0	0	0	0	14	0	13	0	0	0	Bacteria	Myxococcota	Polyangia	Haliangiales	Haliangiaceae	Haliangium	NA	CGTTGCTCGGAATCATTGGGCGTAAAGCGCACGTAGGCGGTTCGTTAAGTCGGATGTGAAAGCCCTGGGCTCAACCCAGGAAGTGCATACGAAACTGGCGAACTTGAATATGGAAGAGGGTCGCGGAATTCCCGGTGTAGAGGTGAAATTCGTAGATATCGGGAGGAACACCAGTGGCGAAGGCGGCGACCTGGGCCAATATTGACGCTGAGGTG
ASV_485	0	0	0	0	20	0	0	0	0	0	0	0	3	0	0	0	70	76	0	0	0	Bacteria	Proteobacteria	Alphaproteobacteria	Elsterales	NA	NA	NA	CGTTGTTCGGAATTACTGGGCGTAAAGGGCGCGCAGGCGGCCGATCAAGTCAGGCGTGAAAGCCCCGGGCTTAACCTGGGAATTGCGCTTGGGACTGGTTGGCTTGAGTTCGGGAGAGGAGAGTGGAATTCCCAGTGTAGAGGTGAAATTCGTAGATATTGGGAAGAACACCGGTGGCGAAGGCGGCTCTCTGGACCGATACTGACGCTGAGGCG
ASV_486	0	0	0	75	0	0	72	0	0	0	0	0	0	21	0	0	0	0	0	0	0	Bacteria	Proteobacteria	Alphaproteobacteria	Acetobacterales	Acetobacteraceae	Acidiphilium	NA	CGTTGCTCGGAATGACTGGGCGTAAAGGGCGTGTAGGCGGCTTGGACAGTCGGGTGTGAAATTCCTGGGCTTAACCTGGGGGCTGCATCCGAGACGTTTGGGCTGGAGTGGGGAAGAGGGTCGTGGAATTCCCAGTGTAGAGGTGAAATTCGTAGATATTGGGAAGAACACCGGTGGCGAAGGCGGCGACCTGGTCCTTGACTGACGCTGAGGCG
ASV_487	0	0	0	0	0	0	0	0	0	0	20	0	148	0	0	0	0	0	0	0	0	Bacteria	Actinobacteriota	Thermoleophilia	Solirubrobacterales	NA	NA	NA	CGTTGTCCGGAATCATTGGGCGTAAAGAGCGTGTAGGCGGCCCGGTCAGTCCGCCGTGAAAGTCCAGGGCTCAACCCTGGAATGCCGGTGGATACTGCCGGGCTAGAGTCCGGAAGAGGCGAGTGGAATTCCTGGTGTAGCGGTGAAATGCGCAGATATCAGGAGGAACACCAATGGCGAAGGCAGCTCGCTGGGACGGTACTGACGCTGAGACG
ASV_488	0	0	0	0	0	0	0	138	0	0	0	0	0	28	0	0	0	0	0	0	0	Bacteria	WPS-2	NA	NA	NA	NA	NA	CGTTGTCCGGAATCATTGGGCGTAAAGCGCTCGTAGGCGGATCGGTAAGTCTGTGAAGAAAGACCCGGGCTCAACTCGGGGAACGGCATAGATACTATCGATCTTGAGGTAATCAGAGGATGATGGAATTCCCGGTGTAGCGGTGAAATGCGTAGATATCGGGAGGAACACCAGTGGCGAAGGCGATCATCTGGGGTTATTCTGACGCTGAGGAG
ASV_489	0	0	0	0	0	0	0	100	0	0	0	0	0	65	0	0	0	0	0	0	0	Bacteria	Proteobacteria	Alphaproteobacteria	Acetobacterales	Acetobacteraceae	Acidiphilium	NA	CGTTGCTCGGAATGACTGGGCGTAAAGGGCGCGTAGGCGGATGACACAGTCAGGCGTGAAATTCCTGGGCTCAACCTGGGGACTGCGTCTGATACGTGTGATCTAGAGTAGGGAAGAGGGTCGTGGAATTTCCAGTGTAGAGGTGAAATTCGTAGATATTGGAAAGAACACCGGTGGCGAAGGCGGCGACCTGGTCCTTTACTGACGCTGAGGCG
ASV_490	68	95	0	0	0	0	0	0	0	0	0	0	0	0	0	0	0	0	0	0	0	Bacteria	Chloroflexi	AD3	NA	NA	NA	NA	TACGTAGGGGGCGAGCGTTACCCGGATTCACTGGGCGTAAAGCGCGTGTAGGCGGCTGGTCAAGCGTGGTGTGAAATCTCCGGGCTCAACCCGGAAACTGCACTGCGAACTGGCCTGGCTGGAGTGCAGGAGAGGGCAGCGGAATTCCCGGTGTAGCGGTGAAATGCGTAGATATCGGGAGGAACACCGGTGGCGAAGGCGGCTGCCTGGCCTGTCACTGACGCTGAGACGCGAAAGCGTGGGGAG
ASV_491	0	0	0	25	0	0	0	77	0	0	0	0	0	61	0	0	0	0	0	0	0	Bacteria	Actinobacteriota	Actinobacteria	Corynebacteriales	Nocardiaceae	NA	NA	CGTTGTCCGGAATTACTGGGCGTAAAGAGCTCGTAGGCGGTTTGTCGCGTCGTTTGTGAAAACCACCGCTCAACGGTGGGCTTGCAGGCGATACGGGCAGACTTGAGTATTGCAGGGGAGACTGGAATTCCTGGTGTAGCGGTGAAATGCGCAGATATCAGGAGGAACACCGGTGGCGAAGGCGGGTCTCTGGGCAAATACTGACGCTGAGGAGC
ASV_492	0	0	0	0	0	0	0	0	0	0	0	0	0	0	0	0	0	0	0	0	163	Bacteria	Cyanobacteria	Cyanobacteriia	Cyanobacteriales	Nostocaceae	Stigonema SAG 48.90	NA	ATGTGTCAGCGCCGCGGTAATACGGAGGATGCAAGCGTTATCCGGAATGATTGGGCGTAAAGCGTCCGCAGGTGGCAGTGAAAGTCTGCTGTTAAAGAGTCTGGCTCAACCAGATAAAGGCAGTGGAAACTACACAGCTAGAGTGCGTTCGGGGTAGAGGGAATTCCTGGTGTAGCGGTGAAATGCGTAGAGATCAGGAAGAACACCGGTGGCGA
ASV_493	0	0	0	117	0	0	0	31	0	0	0	0	0	14	0	0	0	0	0	0	0	Bacteria	Armatimonadota	Armatimonadia	Armatimonadales	NA	NA	NA	CGTTGTCCGAAGTTACTGGGCGTAAAGAGCGCGTAGGCGGGTCTTTAAGTGAGGGGTGAAAGGTTCAGGGCTCAACCCGGACACTGCCTTTCATACTGGGGACCTTGAGTGCGGGAGAGGCGAGTGGAATGGTCGGTGTAGCGGTGAAATGCGTAGATATCGATCGGAACACCCATGGCGAAGGCAGCTCGCTGGCCTGCAACTGACGCTGAGGC
ASV_494	0	0	0	0	0	0	0	0	0	12	0	0	150	0	0	0	0	0	0	0	0	Bacteria	Actinobacteriota	Acidimicrobiia	IMCC26256	NA	NA	NA	CGTTGTCCGGAATCATTGGGCGTAAAGAGCTCGTAGGCGGTTTGGTAAGTCGGGTGTGAAACCTCCAGGCTCAACCTGGAGATGCCACTCGATACTGCCATGACTAGAGTCCGGTAGGGGTCCACGGAATTCCTGGTGTAGCGGTGAAATGCGCAGATATCAGGAGGAACACCGGTGGCGAAGGCGGTGGGCTGGGCCGGAACTGACGCTGAGGA
ASV_495	7	154	0	0	0	0	0	0	0	0	0	0	0	0	0	0	0	0	0	0	0	Bacteria	Planctomycetota	Planctomycetes	Gemmatales	Gemmataceae	NA	NA	GACGAACCGTGCGAACGTTGTTCGGATTCACTGGGCTTAAAGGGCGCGTAGGCGGGTCATCAAGTCGGGGGTGAAATCTTTCCGCTCAACGGGAAAAGTGCCTCCGATACTGACGATCTCGAGGGAGGTAGGGGCATGCGGAACTTCCGGTGGAGCGGTGAAATGCGTAGATATCGGAAGGAACGCCGGTGGCGAAAGCGGCGTGCTGGACCTCTGCTGACGCTGAGGCGCGAAAGCCAGGGGAGC
ASV_496	0	0	0	0	0	0	15	99	0	0	0	0	0	47	0	0	0	0	0	0	0	Bacteria	Chloroflexi	Ktedonobacteria	Ktedonobacterales	JG30-KF-AS9	NA	NA	CGTTGTCCGGAGTTACTGGGCGTAAAGGGTGCGCAGGCGGTTGCGCGCGTGGACGGTGAAATCTCCTGGCTCAACTGGGAGGGTGGCGTCCAGACGGCGCGACTTGAGGCTCGTAGAGGGGCGTGGAACTCCGGGTGGAGCGGTGAAATGCGTAGAGATCCGGAAGAACACCGACGGCGCAGGCAGCGCCCTGGGCGAGACCTGACGCTGAGGCA
ASV_497	0	0	0	0	0	0	0	0	0	0	0	0	0	0	0	0	0	0	81	80	0	Bacteria	NA	NA	NA	NA	NA	NA	CGTTACCCGGATTTACTGGGCGTAAAGGGTCCGCAGGCGCCCGGCAAGTCGGGCGTGAAATCCCTCGGCTTAACCGAGGAACGGCGTCCGATACTACCGGGCTTGAGGACGGGAGAGGGAGGTGGAATTCCCGGAGTAGCGGTGAAATGCGTAGATACCGGGAGGAACACCGGTGGCGAAGGCGGCCTCCTGGCCCGTTCCTGACGCTCAGGACG
ASV_498	160	0	0	0	0	0	0	0	0	0	0	0	0	0	0	0	0	0	0	0	0	Bacteria	Acidobacteriota	Blastocatellia	Blastocatellales	Blastocatellaceae	NA	NA	TACGTAGGGAGCAAGCGTTGTTCGGATTTACTGGGCGTAAAGGGCGCGTAGGCGGCGCGGTAAGTCACTTGTGAAATCTCTGAGCTTAACTCAGAACGGCCAAGTGATACTGCTGTGCTAGAGTGCGGAAGAGGCAACCGGAATTCTTGGTGTAGCGGTGAAATGCGTAGATATCAAGAGGAACACCTGAGGCGAAGGCGGGTTGCTGGGCCGACACTGACGCTGATGCGCGAAAGCCAGGGGAGC
ASV_499	0	160	0	0	0	0	0	0	0	0	0	0	0	0	0	0	0	0	0	0	0	Bacteria	Myxococcota	Polyangia	Haliangiales	Haliangiaceae	Haliangium	NA	TACGGAGGGTGCAAACGTTGCTCGGAATCATTGGGCGTAAAGCGCACGTAGGCGGTTCGTTAAGTCGGGTGTGAAAGCCCCGGGCTCAACCCGGGAAGGGCACTCGAAACTGGCGAGCTGGAGTACGGAAGAGGGTCTCGGAATTCCCGGTGTAGAGGTGAAATTCGTAGATATCGGGAGGAACACCAGTGGCGAAGGCGGAGACCTGGGCCGATACTGACGCTGAGGTGCGAAAGCGTGGGGAGC
ASV_500	0	0	0	0	0	0	0	0	0	0	0	0	74	0	8	20	58	0	0	0	0	Bacteria	Acidobacteriota	Acidobacteriae	Acidobacteriales	NA	NA	NA	CGTTGTTCGGAATTATTGGGCGTAAAGGGCGCGTAGGCGGTGCGGTAAGTCACCTGTGAAACCTCTAGGCTCAACCTAGAGCCTGCAGGCGAAACTGCCGTGCTTGAGGGTGGGAGAGGTGCGTGGAATTCCCGGTGTAGCGGTGAAATGCGTAGATATCGGGAGGAACACCTGTGGCGAAAGCGGCGCACTGGACCACATCTGACGCTGAGGCG
ASV_501	158	0	0	0	0	0	0	0	0	0	0	0	0	0	0	0	0	0	0	0	0	Bacteria	Actinobacteriota	Acidimicrobiia	NA	NA	NA	NA	TACGTAGGGGGCGAGCGTTGTCCGGATTCATTGGGCGTAAAGAGCTCGTAGGCGGCTTGGTAAGTCGGGTGTGAAACCCCCAGGCTCAACCTGGGGCCGCCACTCGATACTGCCATGGCTAGAGTCCGGTAGGGGCCCATGGAATTCCTGGTGTAGCGGTGAAATGCGCAGATATCAGGAGGAACACCAGTGGCGAAGGCGGTGGGCTGGGCCGGTACTGACGCTGAGGAGCGAAAGCGTGGGGAG
ASV_502	0	0	0	0	6	0	0	0	0	0	0	0	0	0	27	18	0	0	0	25	82	Bacteria	Actinobacteriota	Acidimicrobiia	IMCC26256	NA	NA	NA	CGTTGTCCGGATTTATTGGGCGTAAAGAGCTCGTAGGCGGTTCGGCAAGTCGGATGTGAAATCTCCACGCTTAACGTGGAGGGGCCATTCGAAACTGCCGTGACTCGAGTCCGGTAGGGGAGTGTGGAATTCCCGGTGTAGCGGTGAAATGCGCAGATATCGGGAGGAACACCAGTAGCGAAGGCGGCACTCTGGGCCGGTACTGACGCTGAGGA
ASV_503	0	0	0	0	0	0	0	0	44	14	0	0	0	0	0	0	0	0	0	0	97	Archaea	Crenarchaeota	Nitrososphaeria	SCGC AB-179-E04	NA	NA	NA	ATGTGTCAGCGCCGCGGTAATACCAGCTCCCCGAGTGGTCGGGACGATTATTGGGCCTAAAGCATCCGTAGCCGGCTTCACAGGTCTCTTGTTAAATCCAACGGCTCAACCGTTGGACCGCAGGAGATACCATGGAGCTAGGGGGCGGGAGAGGCGGACGGTACTCCATGGGTAGGGGTAAAATCCTTTGATCCATGGAAGACCACCAGTGGCGA
ASV_504	0	0	0	0	0	0	0	0	0	108	44	0	3	0	0	0	0	0	0	0	0	Bacteria	NA	NA	NA	NA	NA	NA	CGTTGTCCGGAATCATTGGGCGTAAAGCGCGCGTAGGCGGCGCGGCAGATCATGCGTGCAAGCCCCGGGCTCAACTCGGGGAGGTCGGGTGAGATGGCCGTGCTCGAGGCCGGTAGGGGGGCGTGGAATTCCCGGTGTAGTGGTGGAATGCGTAGAGATCGGGAGGAACACCAGTGGCGAAGGCGGCGCCCTGGGCCGGGCCTGACGCTGAGGCG
ASV_505	0	0	0	0	0	0	48	34	0	0	0	0	0	72	0	0	0	0	0	0	0	Bacteria	Actinobacteriota	Actinobacteria	Micrococcales	Microbacteriaceae	Amnibacterium	NA	CGTTGTCCGGAATTATTGGGCGTAAAGAGCTCGTAGGCGGTTTGTCGCGTCTGCTGTGAAAACGCGAGGCTCAACCTCGCGCCTGCAGTGGGTACGGGCAGACTAGAGTGCGGTAGGGGAGATTGGAATTCCTGGTGTAGCGGTGGAATGCGCAGATATCAGGAGGAACACCGATGGCGAAGGCAGATCTCTGGGCCGTTACTGACGCTGAGGAG
ASV_506	0	153	0	0	0	0	0	0	0	0	0	0	0	0	0	0	0	0	0	0	0	Archaea	Crenarchaeota	Nitrososphaeria	Nitrososphaerales	Nitrososphaeraceae	Candidatus Nitrososphaera	NA	TACCAGCACCCCGAGTGGTCGGGACGATTATTGGGCCTAAAGCATCCGTAGCTGGTTCTGCAAGTCTTCCGTTAAATCCACCTGCTCAACAGATGGGCTGCGGAGGATACTACAGGGCTAGGAGGCGGGAGAGGCAAGCGGTACTCAGTGGGTAGGGGTAAAATCCTCTGATCCACTGAAGACCACCAGTGGCGAAGGCGGCTTGCCAGAACGCGCTCGACGGTGAGGGATGAAAGCTGGGGGAGC
ASV_507	0	0	0	59	0	0	9	47	0	0	0	4	14	20	0	0	0	0	0	0	0	Bacteria	Dependentiae	Babeliae	Babeliales	UBA12409	NA	NA	CGTTATTCGGATTGATTGGGCGTAAAGGGTGTGTAGGCGGTATATTAAGTCAATTGTTAAATCTCCCGGCTTAACCGGGAATCAGCAGTTGAAACTGATATGCTTGAGGGTGGAAGAGAGAAGTGGAATTCTCGGAGTAGCGGTAAAATGCGTAGATCTCGAGAGGAACACCGATGGCGAAGGCAGCTTCTTAGTCCACACCTGACGCTGAGGCA
ASV_508	0	0	0	0	30	0	0	0	10	0	100	0	0	0	0	0	0	0	0	0	12	Bacteria	Acidobacteriota	Acidobacteriae	Acidobacteriales	Acidobacteriaceae (Subgroup 1)	Granulicella	NA	CGTTGTTCGGATTTATTGGGCGTAAAGGGTGCGTAGGCGGTTTGGCAAGTCTTGTGTGAAATCTATGGGCTCAACCCATAGCCTGCACGAGAAACTACCGGGCTTGAGTATTGGAGAGGTGAGTGGAATTTCCGGTGTAGCGGTGAAATGCGTAGATATCGGAAGGAACACCTGTGGCGAAAGCGGCTCACTGGACAATAACTGACGCTGATGCA
ASV_509	151	0	0	0	0	0	0	0	0	0	0	0	0	0	0	0	0	0	0	0	0	Bacteria	Chloroflexi	JG30-KF-CM66	NA	NA	NA	NA	TACGTAGGTGGCAAGCGTTGTCCGGATTTATTGGGCGTAAAGCGCGCGCAGGCGGTCCGTTTAGTCCGAGGTAAAATCTCCCGGCTCAACTGGGAGGGGTCTTCGGATACTGGCGGACTGGAGGAGAGCAGAGGTGAGCGGAATTCTCGGTGTAGTGGTGAAATGCGTAGATATCGAGAGGAACACCAGTGGCGAAGGCGGCTCACTGGGCTCCACCTGACGCTGAGGCGCGAAAGCGTGGGGAGC
ASV_510	0	0	0	0	0	0	0	0	0	0	0	0	0	0	0	5	55	87	0	0	4	Bacteria	Proteobacteria	Alphaproteobacteria	NA	NA	NA	NA	CGTTGTTCGGAATTACTGGGCGTAAAGGGCGCGTAGGCGGCTGTGCAAGTCAGGTGTGAAAGCCCTGGGCTCAACCCAGGATGTGCACTTGATACTGCACGGCTAGAGTGTCGGAGAGGATGGTGGAATTCCCAGTGTAGAGGTGAAATTCGTAGATATTGGGAAGAACACCGGTGGCGAAGGCGACCATCTGGACGACAACTGACGCTGAGGCG
ASV_511	0	0	40	18	0	7	0	0	5	0	0	14	0	0	19	0	0	0	7	21	19	Bacteria	Firmicutes	Sulfobacillia	Sulfobacillales	Sulfobacillaceae	NA	NA	CGTTGTCCGGAGTTACTGGGCGTAAAGGGCGTGTAGGCGGCGCGACGCGTCGGGAGTGAAAGGCGCGGGCTCAACCTGCGTGGTGCTTTCGAAACGGTCGTGCTAGAGGGCCGGAGAGGGAAGCGGAATTGCCGGTGTAGCGGTGAAATGCGTAGATATCGGCAGGAACACCAGTGGCGAAGGCGGCTTCCTGGACGGCACCTGACGCTGAGGCG
ASV_512	0	0	0	0	0	0	0	0	0	0	0	0	0	0	0	0	5	35	0	12	98	Bacteria	Proteobacteria	Gammaproteobacteria	Burkholderiales	Comamonadaceae	Rhizobacter	NA	CGTTAATCGGAATTACTGGGCGTAAAGCGTGCGCAGGCGGCTTTGCAAGACAGATGTGAAATCCCCGGGCTCAACCTGGGAACTGCATTTGTGACTGCATGGCTAGAGTACGGTAGAGGGGGATGGAATTCCGCGTGTAGCAGTGAAATGCGTAGATATGCGGAGGAACACCGATGGCGAAGGCAATCCCCTGGACCTGTACTGACGCTCATGCA
ASV_513	0	0	0	0	19	0	0	0	9	31	23	0	7	0	0	0	33	27	0	0	0	Bacteria	Proteobacteria	Alphaproteobacteria	Acetobacterales	Acetobacteraceae	NA	NA	CGTTGCTCGGAATGACTGGGCGTAAAGGGCGCGTAGGCGGTTCGTACAGTCAGACGTGAAATTCCCGGGCTCAACCTGGGGGCTGCGTTTGATACGTGCGGGCTTGAGTTCGGAAGAGGGTCGTGGAATTCCCAGTGTAGAGGTGAAATTCGTAGATATTGGGAAGAACACCGGTGGCGAAGGCGGCGACCTGGTCCGATACTGACGCTGAGGCG
ASV_514	0	0	0	0	20	0	0	0	0	0	0	0	4	0	0	10	2	112	0	0	0	Bacteria	Bacteroidota	Bacteroidia	Chitinophagales	Chitinophagaceae	Puia	NA	CGTTATCCGGATTCACTGGGTTTAAAGGGTGCGTAGGCGGATTGGTAAGTCCGTGGTGAAATCTCCAAGCTTAACTTGGAAACTGCCGTGGATACTCTCAATCTTGAATATAGTGGAGGTGAGCGGAATATGTCATGTAGCGGTGAAATGCTTAGATATGACATAGAACACCCATTGCGAAGGCAGCTCGCTACACTATCATTGACGCTGAGGCA
ASV_515	0	0	0	0	120	0	0	0	0	0	15	0	8	0	0	0	4	0	0	0	0	Bacteria	Proteobacteria	Alphaproteobacteria	Rhizobiales	NA	NA	NA	CGTTGTTCGGAATTACTGGGCGTAAAGCGCACGTAGGCGGACATTTAAGTTGGAGGTGAAAGCCTTGGGCTCAACCCAAGAATTGCCTTCGATACTGGATGTCTCGAGACCGGGAGAGGTGAGTGGAATTCCGAGTGTAGAGGTGAAATTCGTAGATATTCGGAAGAACACCAGTGGCGAAGGCGGCTCACTGGCCCGGTTCTGACGCTGAGGTG
ASV_516	0	0	11	15	0	54	17	0	0	0	5	0	0	36	0	0	0	0	0	3	5	Bacteria	Planctomycetota	Planctomycetes	Gemmatales	Gemmataceae	NA	NA	CGTTGTTCGGAATCACTGGGCTTAAAGGGCGCGTAGGCGGGTGCTCAAGTCCGGGGTGAAATCCCACAGCTCAACTGTGGAACTGCCTCGGATACTGGGTGCCTCGAGGTTGGTAGGGGTATGCGGAACTATCGGTGGAGCGGTGAAATGCGTTGATATCGATAGGAACTCCGGTGGCGAAGGCGGCATACTGGACCACATCTGACGCTGAGGCG
ASV_517	0	0	0	0	0	0	0	123	0	0	0	0	0	23	0	0	0	0	0	0	0	Bacteria	Bacteroidota	Bacteroidia	Chitinophagales	Chitinophagaceae	NA	NA	CGTTATCCGGATTCACTGGGTTTAAAGGGTGCGTAGGCGGACAAGTAAGTCAGTGGTGAAATCTCCGAGCTTAACTCGGAAACTGCCGTTGATACTATTTGTCTTGAATGTTGTGGAGGTAAGCGGAATATGTCATGTAGCGGTGAAATGCTTAGATATGACATAGAACACCAATTGCGAAGGCAGCTTACTACACAACGATTGACGCTGAGGCA
ASV_518	0	0	0	0	99	0	0	0	0	0	0	0	46	0	0	0	0	0	0	0	0	Bacteria	Myxococcota	Polyangia	Haliangiales	Haliangiaceae	Haliangium	NA	CGTTGCTCGGAATCATTGGGCGTAAAGCGCACGTAGGCGGCCTGATAAGTCGGGTGTGAAAGCCCTGGGCTCAACCCAGGAAGTGCACTCGAAACTGCCAGGCTTGAATATGGAAGAGGGTCGCGGAATTCCCGGTGTAGAGGTGAAATTCGTAGATATCGGGAGGAACACCAGTGGCGAAGGCGGCGACCTGGGCCAATATTGACGCTGAGGTG
ASV_519	0	0	0	0	14	0	0	0	5	0	0	0	70	0	0	0	0	0	0	46	10	Bacteria	Proteobacteria	Gammaproteobacteria	NA	NA	NA	NA	CGTTGTTCGGAATTATTGGGCGTAAAGCGTGCGTAGGCGGATCCGCAAGTCGGGGTTGAAATATCCGGGCTCAACTCGGGGCACGGCCCCGATACTGCGGGTCTCGAGTCGAGAAGAGGGTAGTGGAATTCCCGGTGTAGCGGTGAAATGCGTAGATATCGGGAGGAACACCAGTGGCGAAGGCGGCTACCTGGTCTTGCACTGACGCTGAGGCA
ASV_520	86	57	0	0	0	0	0	0	0	0	0	0	0	0	0	0	0	0	0	0	0	Bacteria	NA	NA	NA	NA	NA	NA	GACGTAGGGGGCAAGCGTTGTCCGGAGTTACTGGGCGTAAAGCGCGCGCAGGCGGTGCGGTAAGTTCGCGGTGAAAGCCCCTGGCTCACCTGGGGGAGGTCCGCGGAGACTGCCGCACTGGAGGGGGGCAGAGGCCGGTGGAATTCCCGGTGTAGTGGTGAAATACGTAGAGATCGGGAGGAACACCCGTGGCGAAGGCGGCCGGCTGGGCCCTACCTGACGCTGAGGCGCGAAAGCGTGGGGAGC
ASV_521	0	0	0	0	0	0	0	125	0	0	0	0	0	18	0	0	0	0	0	0	0	Bacteria	Armatimonadota	Armatimonadia	Armatimonadales	NA	NA	NA	CGTTGTCCGAAGTTACTGGGCGTAAAGAGCGCGTAGGCGGACTCTTAAGTGAGGGGTGAAAGTCCGAGGCTCAACCTCGGAACTGCCTTTCATACTGGGAGCCTTGAGTGCGGGAGAGGCGAGTGGAATGGTTGGTGTAGCGGTGAAATGCGTAGATATCAATCGGAACACCCATGGCGAAGGCAGCTCGCTGGCCTGTAACTGACGCTGAGGCG
ASV_522	0	0	0	0	0	0	0	0	0	0	0	0	0	0	0	0	0	0	0	142	0	Archaea	Crenarchaeota	Nitrososphaeria	Caldiarchaeales	Terrestrial Hot Spring Gp(THSCG)	NA	NA	GATGTGTCAGCGCCGCGGTAATACCAGCTCCCCGAGTGGTCGGGACGATTATTGGGCCTAAAGCATCCGTAGCCGGTCCCGTAAGTCCCCTGTTAAATCCAACGGCTCAACCGTTGGGCTGCAGGGGATACTGCGGGACTAGGGGGCGGGAGAGGCCGCCGGTATTCCCGGGGTAGGGGTAAAATCCTCTGATCCCGGGAGGACCACCAGTGGCG
ASV_523	141	0	0	0	0	0	0	0	0	0	0	0	0	0	0	0	0	0	0	0	0	Bacteria	Planctomycetota	Planctomycetes	Gemmatales	Gemmataceae	NA	NA	GACGAACCGTGCGAACGTTGTTCGGAATCACTGGGCTTAAAGGGCGCGTAGGCGGATCATCAAGTCAGGGGTGAAATCCCACGGCTCAACCGTGGAAGTGCCTTTGATACTGATGGTCTGGAGTGGGGTAGGGGCATGCGGAACTGGTGGTGGAGCGGTGAAATGCGTAGATATCACTAGGAACGCCGGTGGCGAAAGCGGCGTGCTGGACCCCAACTGACGCTGAGGCGCGAAAGCCAGGGGAGC
ASV_524	0	0	0	0	5	0	0	0	59	0	8	0	17	0	0	13	25	14	0	0	0	Bacteria	Cyanobacteria	Vampirivibrionia	Obscuribacterales	Obscuribacteraceae	NA	NA	CGTTGTCCGGATTTATTGGGCGTAAAGAGTTCGTAGGCGGTTCGTTAAGTCTGATGTTAAAGATCGGGGCTCAACCCCGGGAGTGCATTGGATACTGGCGGACTGGAGTGCGGTAGAGGTTAGTGGAATTCCTGGTGTAGCGGTGAAATGCGTAGATATCAGGAAGAACACCAGTGGCGTAGGCGACTAACTGGGCCGTAACTGACGCTGAGGAA
ASV_525	0	0	0	0	0	0	0	88	0	0	0	0	0	53	0	0	0	0	0	0	0	Bacteria	Myxococcota	Polyangia	Haliangiales	Haliangiaceae	Haliangium	NA	CGTTGCTCGGAATCATTGGGCGTAAAGCGCACGTAGGCGGCGCGTTAAGTCGGATGTGAAAGCCCCGGGCTCAACCCGGGAAGTGCATACGAAACTGGCGCGCTTGAATATGGAAGAGGGTCGCGGAATTCCCGGTGTAGAGGTGAAATTCGTAGATATCGGGAGGAACACCAGTGGCGAAGGCGGCGACCTGGGCCAATATTGACGCTGAGGTG
ASV_526	0	0	0	0	0	0	0	0	0	0	0	0	39	0	0	30	47	25	0	0	0	Bacteria	Actinobacteriota	Acidimicrobiia	IMCC26256	NA	NA	NA	CGTTGTCCGGATTTATTGGGCGTAAAGAGCTCGTAGGCGGTTCGGTAAGTCGGATGTGAAATCTCCACGCTCAACGTGGAGGGGCCATTCGATACTGCCATGACTTGAGTCCGGTAGGGGAGTGTGGAATTTCCGGTGTAGCGGTGAAATGCGCAGAGATCGGAAGGAACACCCGTAGCGAAGGCGGCACTCTGGGCCGGTACTGACGCTGAGGA
ASV_527	0	0	0	27	0	0	9	9	0	0	0	0	0	94	0	0	0	0	0	0	0	Bacteria	Proteobacteria	Alphaproteobacteria	Rhizobiales	Xanthobacteraceae	NA	NA	CGTTGCTCGGAATCACTGGGCGTAAAGCGCACGTAGGCGGCTTTTTAAGTCAGGGGTGAAATCCTGGAGCTCAACTCCAGAACTGCCTTTGATACTGAGAAGCTTGAGTCCGGGAGAGGTGAGTGGAACTGCGAGTGTAGAGGTGAAATTCGTAGATATTCGCAAGAACACCAGTGGCGAAGGCGGCTCACTGGCCCGGTACTGACGCTGAGATG
ASV_528	0	0	54	0	0	84	0	0	0	0	0	0	0	0	0	0	0	0	0	0	0	Bacteria	Abditibacteriota	Abditibacteria	Abditibacteriales	Abditibacteriaceae	Abditibacterium	NA	CGTTGTCCGGATTTACTGGGCGTAAAGCGTATGCAGGCGGATATTTAAGTAGGAAGTGAAAGGTTGGAGCTCAACTCCAACACTGCTTCCTATACTGGGTGTCTTGAGTGGCGGAGAGGAAAGCGGAACAAATCGTGTAGCGGTGAAATGCGTAGATATGATTTGGAACACCAATGGCGAAAGCAGCTTTCTGGACGCAAACTGACGCTGAGATA
ASV_529	0	0	0	0	0	0	0	0	0	0	0	0	0	0	0	0	0	0	116	0	21	Bacteria	Deinococcota	Deinococci	Thermales	Thermaceae	Meiothermus	NA	ATGTGCAGCGCCGCGGTAATACGGAGGGTGCGAGCGTTACCCGGATTTACTGGGCGTAAAGGGCGTGTAGGCGGTCCTCTAAGTCCAAGGCTAAAGACTAGGGCTCAACCCTGGACCTGCCTCGGATACTGGAGGGCTCGACGGCTGGAGGGGGCAGCGGAATTTCCGGAGTAGCGGTGAAATGCGCAGATACCGGAAGGAACGCCAATAGCGAA
ASV_530	0	0	15	0	0	49	17	0	2	0	0	34	0	19	0	0	0	0	0	0	0	Bacteria	Chloroflexi	NA	NA	NA	NA	NA	CGTTGTCCGGATTTACTGGGCGTAAAGCGCGCGTAGGCGGTCGGGCGCGTCGGTGGTGAAAGGTCTCGGCTCAACCGAGACAGGTCTGCCGAGACGGTCCGACTGGAGGGCGGTAGAGGCCGGTGGAATTCCCGGTGTAGTGGTGAAATGCGTAGAGATCGGGAGGAACACCAGTGGCGAAGGCGGCCGGCTGGGCCGTCCCTGACGCTGAGGCG
ASV_531	0	0	0	0	113	0	0	0	0	0	0	0	11	0	0	4	0	8	0	0	0	Bacteria	Proteobacteria	Alphaproteobacteria	Acetobacterales	Acetobacteraceae	Acidicaldus	NA	CGTTGCTCGGAATGACTGGGCGTAAAGGGCGCGTAGGCGGCTCATAGAGTCGGGCGTGAAATTCCTGGGCTTAACCTGGGGGCTGCGTTCGATACCTATGGACTGGAGTGAGGAAGAGGGTCGTGGAATTCCCAGTGTAGAGGTGAAATTCGTAGATATTGGGAAGAACACCAGTGGCGTAGGCGGCGACCTGGTCCTTTACTGACGCTGAGGCG
ASV_532	0	0	0	0	49	0	0	0	4	18	10	0	13	0	0	6	13	22	0	0	0	Bacteria	Chloroflexi	NA	NA	NA	NA	NA	CGTTGTCCGGATTTATTGGGCGTAAAGCGCGCGCAGGTGGTCCCGTAAGTCCTGTGTGAAATCTCCCGGCTCACCTGGGAGGGGGCGCGGGATACTGGGGGACTGGAGGCAGGCAGAGGCCGGTGGAATTCCCGGTGTAGTGGTGAAATGCGTAGAGATCGGGAGGAACACCAGTGGCGAAAGCGGCCGGCTGGGCCTGTTCTGACGCTGAGGCG
ASV_534	0	0	0	0	0	0	0	0	0	0	0	0	0	0	20	11	0	0	0	0	104	Bacteria	Acidobacteriota	Acidobacteriae	Solibacterales	Solibacteraceae	Candidatus Solibacter	NA	CGTTGTTCGGAGTTACTGGGCGTAAAGGGTGCGTAGGCGGCCCCATAAGTATGGTGTGAAATCTCCCGGCTTAACTGGGAGGGTGCGCTATAGACTGTGGGGCTAGAGTGTGGGAGAGGAAAGTGGAATTCCTGGTGTAGCGGTGAAATGCGTAGATATCAGGAGGAACACCGGTGGTGTAAACGGCTTTCTGGACCATAACTGACGCTGATGCA
ASV_535	0	0	75	0	0	39	0	0	0	0	0	0	0	19	0	0	0	0	0	0	0	Bacteria	Deinococcota	Deinococci	Thermales	Thermaceae	Meiothermus	NA	CGTTACCCGGATTTACTGGGCGTAAAGGGCGTGTAGGCGGTCCCTCAAGTCCGATGCTAAAGACCGGGGCTCAACCCCGGGGGTGCGTTGGATACTGTCGGGCTAGACGGTCGGAGGGGGCAGCGGAATTTCCGGAGTAGCGGTGAAATGCGCAGATACCGGAAGGAACGCCAATAGCGAAGGCAGCTGCCTGGACGACTTGTGACGCTGAGGCG
ASV_538	0	0	0	0	18	0	0	0	0	50	63	0	0	0	0	0	0	0	0	0	0	Bacteria	Proteobacteria	Alphaproteobacteria	Acetobacterales	Acetobacteraceae	Acidiphilium	NA	CGTTGCTCGGAATGACTGGGCGTAAAGGGCGCGTAGGCGGAATGCTTTGTCGGGCGTGAAATTCCAGGGCTTAACCTTGGGACTGCGTTCGAGACGGGTATTCTAGAGTGGAGAAGAGGGTCGTGGAATTCCCAGTGTAGAGGTGAAATTCGTAGATATTGGGAAGAACACCGGTGGCGAAGGCGGCGACCTGGTCTTTTACTGACGCTGAGGCG
ASV_539	0	0	0	0	0	0	0	0	0	0	0	131	0	0	0	0	0	0	0	0	0	Archaea	Crenarchaeota	Nitrososphaeria	Nitrososphaerales	Nitrososphaeraceae	Candidatus Nitrososphaera	NA	GATGTGTCAGCGCCGCGGTAATACCAGCACCCCGAGTGGTCGGGACGATTATTGGGCCTAAAGCATCCGTAGCCTGTCCTGCAAGTCTTCCGTTAAATCCACCTGCTTAACAGATGGGCCGCGGAGGATACTACAGGGCTAGGAGGCGGGAGAGGCAAACGGTACTCAGTGGGTAGGGGTAAAATCCACTGATCCACTGAAGACCACCAGTGGCG
ASV_540	0	0	0	0	26	0	0	0	0	0	0	0	13	0	0	0	32	57	0	0	0	Bacteria	Proteobacteria	Alphaproteobacteria	Rhizobiales	Hyphomicrobiaceae	Pedomicrobium	NA	CGTTGTTCGGAATCACTGGGCGTAAAGCGCACGTAGGCGGATGTGTCAGTCAGGGGTGAAATCCCGGAGCTCAACTTCGGAACTGCCTTTGATACAGCACGTCTTGAGTCCGATAGAGGTGGGTGGAATTCCTAGTGTAGAGGTGAAATTCGTAGATATTAGGAAGAACACCGGTGGCGAAGGCGGCCCACTGGATCGGTACTGACGCTGAGTGC
ASV_541	0	0	0	0	0	0	0	0	0	0	0	0	0	0	0	5	8	0	0	13	102	Bacteria	Proteobacteria	Alphaproteobacteria	Elsterales	NA	NA	NA	CGTTGTTCGGAATTACTGGGCGTAAAGGGCGCGCAGGCGGTCCTTCAAGTCAGGCGTGAAAGCCCCGGGCTCAACCTGGGAACTGCGCTTGAGACTGGAGGACTAGAGTTCGGGAGAGGAGAGTGGAATTCCCAGTGTAGAGGTGAAATTCGTAGATATTGGGAAGAACACCAGTGGCGAAGGCGGCTCTCTGGACCGATACTGACGCTGAGGCG
ASV_542	0	0	0	0	16	0	0	15	5	26	60	0	0	5	0	0	0	0	0	0	0	Bacteria	WPS-2	NA	NA	NA	NA	NA	CGTTATTCGGAATTATTGGGCGTAAAGAGTTCGTAGGCGGCTTGATAAGTCTGTGAAGAAAGACCTGGGCTCAACCCAGGGAACGGCACGGATACTATCGAGCTTGAGGTGATCAGAGGGTAATGGAATTCCCGGTGTAGCGGTGAAATGCGTAGATATCGGGAGGAACACCAGTGGCGAAGGCGATTACCTGGGGTCAATCTGACGCTGAGGAA
ASV_544	0	0	0	0	69	0	0	39	0	0	16	0	2	0	0	0	0	0	0	0	0	Bacteria	Actinobacteriota	Actinobacteria	Corynebacteriales	Mycobacteriaceae	Mycobacterium	NA	CGTTGTCCGGAATTACTGGGCGTAAAGAGCTCGTAGGTGGTTTGTCGCGTTGTTCGTGAAAACTCACAGCTCAACTGTGGGCGTGCGGGCGATACGGGCAGACTGGAGTACTGCAGGGGAGACTGGAATTCCTGGTGTAGCGGTGGAATGCGCAGATATCAGGAGGAACACCGGTGGCGAAGGCGGGTCTCTGGGCAGTAACTGACGCTGAGGAG
ASV_545	125	0	0	0	0	0	0	0	0	0	0	0	0	0	0	0	0	0	0	0	0	Bacteria	Planctomycetota	Planctomycetes	Gemmatales	Gemmataceae	NA	NA	GACGAACCGAGCGAACGTTGTTCGGAATCACTGGGCTTAAAGGGCGCGTAGGCGGGTGCTCAAGTCCGGGGTGAAATCCCACAGCTCAACTGTGGAACTGCCTCGGATACTGGGTGCCTCGAGGTTGGTAGGGGTATGCGGAACTATCGGTGGAGCGGTGAAATGCGTTGATATCGATAGGAACTCCGGTGGCGAAGGCGGCATACTGGACCACATCTGACGCTGAGGCGCGAAAGCCAGGGGAGC
ASV_546	0	0	0	0	31	0	0	0	30	0	15	0	0	0	0	26	4	19	0	0	0	Bacteria	Myxococcota	Polyangia	Haliangiales	Haliangiaceae	Haliangium	NA	CGTTGCTCGGAATCATTGGGCGTAAAGCGCGCGTAGGCGGTTGCTTAAGTCGGATGTGAAAGCCCTTGGCTCAACTGAGGAAGTGCACCCGAAACTGAGCAGCTAGAGTACGAAAGAGGGTCGCGGAATTCCCGGTGTAGAGGTGAAATTCGTAGATATCGGGAGGAACACCGGTGGCGAAGGCGGCGACCTGGGTCGAGACTGACGCTGAGGCG
ASV_547	106	17	0	0	0	0	0	0	0	0	0	0	0	0	0	0	0	0	0	0	0	Bacteria	Chloroflexi	Ktedonobacteria	Ktedonobacterales	Ktedonobacteraceae	FCPS473	NA	GACGTAGGGAGCGAGCGTTGTCCGGAGTTACTGGGCGTAAAGGGCACGCAGGCGGTCGGTCGCGTTGCCACTGACAGCCGTCGGCTTAACTGACGGAGGTGGGGCAAAACGGGCCGACTTGAGGCTCAGAGAGGCAGACGGAATTCCGCGTGGAGCGGTGAAATGCGTAGAGATGCGGAAGAACACCAAAGGCGAAGGCAGTCTGCTGGCTGAGAGCTGACGCTCAGGTGCGAAAGCCAGGGGAGC
ASV_548	0	123	0	0	0	0	0	0	0	0	0	0	0	0	0	0	0	0	0	0	0	Bacteria	Acidobacteriota	Acidobacteriae	Solibacterales	Solibacteraceae	Candidatus Solibacter	NA	TACGTAGGCAGCGAGCGTTGTTCGGAGTTACTGGGCGTAAAGGGTGTGTAGGCGGTTCTCTAAGTTTGGTGTGAAATCTCCCGGCTCAACCGGGAGGGTGCGCCGAAAACTGGAGAGCTAGAGTGCGGGAGGGGAGAGTGGAATTCCTGGTGTAGCGGTGAAATGCGTAGATATCAGGAGGAACACCGGTGGTGTAGACGGCTCTCTGGACCGTAACTGACGCTGAGACACGAAAGCGTGGGTAGC
ASV_549	0	0	0	0	123	0	0	0	0	0	0	0	0	0	0	0	0	0	0	0	0	Bacteria	Acidobacteriota	Vicinamibacteria	Vicinamibacterales	NA	NA	NA	CGTTGTTCGGAATTACTGGGCGTAAAGGGCTCGTAGGTGGCCAACTAAGTCAGACGTGAAATCCCTCAGCTTAACTGGGGAACTGCGTCTGATACTGGATGGCTTGAGTTTGGGAGAGGGATGCGGAATTCCAGGTGTAGCGGTGAAATGCGTAGATATCTGGAGGAACACCGGTGGCGAAGGCGGCATCCTGGACCAACACTGACACTGAGGAG
ASV_550	0	0	0	0	123	0	0	0	0	0	0	0	0	0	0	0	0	0	0	0	0	Bacteria	NA	NA	NA	NA	NA	NA	CGTTGTCCGGATTTACTGGGCGTAAAGGGCGCGTAGGCGGCTTAATCAGTCGGACTTGTAAGGGCGGGGCTCACCCTCGTTTTGGGTTCGGGACGGTTAAGCTAGGGCGCGGTTGAGGGGTGCGGAATGCCGGGTGTAGTGGTGAAATGCGTAGAGATCCGGCGGAACACCGGTGGAGAAGTCGGCACCCTGGGCCGAGGCCGACGCTGAGGCGC
ASV_551	0	122	0	0	0	0	0	0	0	0	0	0	0	0	0	0	0	0	0	0	0	Bacteria	Myxococcota	Polyangia	Polyangiales	Polyangiaceae	Pajaroellobacter	NA	GACAGAGGGTGCAAACGTTGTTCGGAATTACTGGGCGTAAAGCGTGTGTAGGCGGCTACGCAAGTCGGATGTGAAATCCCCGGGCTCAACCCGGGAAGTGCACCCGAAACTGCGTGGCTTGAGTACCGGAGAGGTTGGTGGAATTCTCGGTGTAGAGGTGAAATTCGTAGATATCGAGAGGAACACCGGTGGCGAAGGCGGCCAACTGGACGAGTACTGACGCTGAGACACGAAAGCGTGGGGAGC
ASV_552	0	121	0	0	0	0	0	0	0	0	0	0	0	0	0	0	0	0	0	0	0	Bacteria	Chloroflexi	AD3	NA	NA	NA	NA	TACGTAGGGGGCAAGCGTTACCCGGATTTACTGGGCGTAAAGCGCGTGTAGGCGGCTGGTCAAGCGTGGTGTGAAATCTCCGGGCTCAACCCGGAAACTGCATTGCGAACTGGCCAGCTAGAGTGCAGGAGAGGGAAGCGGAATTCTCGGTGTAGCGGTGAAATGCGTAGATATCGAGAGGAACACCAGTGGCGAAGGCGGCTTCCTGGCCTGTAACTGACGCTGAGACGCGAAAGCGTGGGGAGC
ASV_553	0	0	0	0	63	0	0	0	0	0	10	0	0	0	0	0	0	48	0	0	0	Bacteria	Planctomycetota	Planctomycetes	Gemmatales	Gemmataceae	NA	NA	CGTTATTCGGATTCACTGGGCTTAAAGGGCGCGTAGGCGGGCATGCAAGTCAGGGGTGAAATCTTTCGGCTTAACCGGAAAAGTGCCTCTGATACTGCGTGCCTCGAGGGAGGTAGGGGCGTGTGGAACTTCCGGTGGAGCGGTGAAATGCGTAGATATCGGAAGGAACGCCGGTGGCGAAAGCGACGCGCTGGACCTCTTCTGACGCTGAGGCG
ASV_555	0	0	0	0	0	0	0	0	6	0	0	0	0	0	115	0	0	0	0	0	0	Bacteria	Chloroflexi	AD3	NA	NA	NA	NA	ATGTGCAGCGCCGCGGTAATACGTAGGGGGCGAGCGTTACCCGGATTCACTGGGCGTAAAGCGCGTGTAGGCGGCTGGTCAAGCGTGGTGTGAAATCTCCGGGCTCAACCCGGAAACTGCACTGCGAACTGGCCTGGCTGGAGTGCAGGAGAGGGCAGCGGAATTCCCGGTGTAGCGGTGAAATGCGTAGATATCGGGAGGAACACCGGTGGCGA
ASV_556	0	0	50	0	0	13	36	0	0	0	0	8	0	0	0	0	0	0	12	0	0	Bacteria	Myxococcota	Polyangia	Polyangiales	Polyangiaceae	Pajaroellobacter	NA	CGTTGTTCGGAATACTGGGCGTAAAGCGTGTGTAGGCGGCCGCGCAAGTCGGATGTGAAATCCCCGGGCTCAACCCGGGAAGTGCACCCGAAACTGCGCGGCTTGAGTACCGGAGAGGTTGGTGGAATTCTCGGTGTAGAGGTGAAATTCGTAGATATCGAGAGGAACACCGGTGGCGAAGGCGGCCAACTGGACGAGTACTGACGCTGAGACAC
ASV_557	0	0	0	0	0	2	4	0	0	61	52	0	0	0	0	0	0	0	0	0	0	Bacteria	NA	NA	NA	NA	NA	NA	CGTTATCCGGAATCACTGGGCGTAAAGGGCACTTAGGTGGTCGGATCGGTCGGGTGTGAAAGCCCCGTGCTCAACGCGGGGAGGGCGCTCGAAACCGTCGGACTGGAGGGTCGGGGAGGCGGACAGAATTCCCGTGGGAGCGGTGAAATGCGTAGAGCACGGGAGGAATGCCAGTGGCGCAAGCGGTCCGCTGCCCGAACCCTGACACTGACGTG
ASV_558	0	0	0	0	0	0	0	25	0	0	0	0	0	94	0	0	0	0	0	0	0	Bacteria	Firmicutes	Sulfobacillia	Sulfobacillales	Sulfobacillaceae	NA	NA	CGTTGTCCGGAATTACTGGGCGTAAAGGGCGTGTAGGCGGCTTGTTGCGTCGGGGGTGAAATCTCCGGGCTCAACCCGGAGGGGTCCTTCGAAACGGGCAGGCTAGAGGGCGGGAGAGGCAAGCGGAATTCCCGGTGTAGCGGTGAAATGCGTAGATATCGGGAAGAACACCAGTGGCGAAGGCGGCTTGCTGGACCGTTCCTGACGCTGAGGCG
ASV_559	0	0	0	0	0	0	0	0	0	0	0	0	0	0	0	0	0	119	0	0	0	Bacteria	Acidobacteriota	Acidobacteriae	Bryobacterales	Bryobacteraceae	Bryobacter	NA	CGTTGTTCGGAGTTACTGGGCGTAAAGAGTGCGTAGGCGGTTTCGTAAGTTTGGTGTGAAATCTCCCGGCTTAACTGGGAGGGTGCGCCGAAAACTGCGGGACTTGAGTGTGGGATAGGTAAGCGGAATTCCTGGTGTAGCGGTGAAATGCGTAGATATCAGGAGGAACACCAGCGGTGTAGACGGCTTACTGGACCACTACTGACGCTGAGGCA
ASV_560	118	0	0	0	0	0	0	0	0	0	0	0	0	0	0	0	0	0	0	0	0	Bacteria	Nitrospirota	Nitrospiria	Nitrospirales	Nitrospiraceae	Nitrospira	NA	TACGAAGGTGGCAAGCGTTGTTCGGATTTACTGGGCGTACAGGGAGCGTAGGCGGTTCGGTAAGCCCTCTGGGAAAGCTCCTGGCTTAACCAGGAAAGGTCGGAGGGGACTGCCGGGCTAGAGGACGGGAGAGGAGCGCGGAATTCCCGGTGTAGCGGTGAAATGCGTAGAGATCGGGAGGAAGGCCGGTGGCGAAGGCGGCGCTCTGGAACGCGCCTGACGCTGAGGCTCGAAAGCGTGGGGAGC
ASV_561	0	0	0	0	0	0	0	91	0	0	0	0	0	27	0	0	0	0	0	0	0	Bacteria	WPS-2	NA	NA	NA	NA	NA	CGTTGTTCGGAATTATTGGGCGTAAAGCGCTCGTAGGCGGGACAGGAAGTCCGTGAAGAAAGACCTGGGCTCAACTCAGGGAACGGCACGGAAACTCTTGTTCTTGAGGTAATCAGAGGGTGATGGAATTCCCGGTGTAGCGGTGAAATGCGTAGATATCGGGAGGAACACCAGTGGCGAAGGCGATCACCTGGGGTTATTCTGACGCTGAGGAG
ASV_562	0	0	0	0	0	0	0	0	0	26	0	0	0	0	0	0	31	23	25	0	13	Bacteria	Deinococcota	Deinococci	Deinococcales	Deinococcaceae	Deinococcus	radiomollis	CGTTACCCGGAATCACTGGGCGTAAAGGGCGTGTAGGCGGGAACTTAAGTCTGGTTTTAAAGACCGGGGCTCAACCTCGGGCATGGACTGGATACTGGGTTTCTAGACCTCTGGAGAGATACTCGGAATTTCTGGTGTAGCGGTGGAATGCGTAGATACCAGAAGGAACACCGATGGCGAAGGCAGAGTATTGGACAGAAGGTGACGCTGAGGCG
ASV_563	117	0	0	0	0	0	0	0	0	0	0	0	0	0	0	0	0	0	0	0	0	Bacteria	Armatimonadota	Fimbriimonadia	Fimbriimonadales	Fimbriimonadaceae	NA	NA	GACGTAGGGTGCGAGCGTTGTCCGGATTTACTGGGCGTAAAGAGTGCGTAGGCGGCTTGTTAAGTGTAGAGTGAAATCTCCAGGGCTCAACCCGGAAACTGCTCTGCATACTGGCAAGCTCGAGGGTCACAGAGGCAACTGGAATTCCTGGTGGAGCGGTGAAATGCGTAGATATCAGGAGGAACTCCCATGGCGAAGGCAGGTTGCTGGGTGACATCTGACGCTGAGGCACGAAAGCGTGGGTAG
ASV_564	0	117	0	0	0	0	0	0	0	0	0	0	0	0	0	0	0	0	0	0	0	Bacteria	Planctomycetota	Planctomycetes	Gemmatales	Gemmataceae	NA	NA	GACGAACCGTGCGAACGTTGTTCGGATTCACTGGGCTTAAAGGGCGCGTAGGCGGGCGGCGAGGTCGGTGGTGAAATCCCCCAGCTCAACTGGGGAAGTGCCTTCGATACCGGCCGTCTCGAGGGGGGTAGGGGCGCGTGGAACTTCCGGTGGAGCGGTGAAATGCGTAGATATCGGAAGGAACGCCGGTGGCGAAAGCGACGCGCTGGGCCCCATTCTGACGCTGAGGCGCGAAAGCCAGGGGAG
ASV_565	0	0	24	0	0	60	21	0	0	0	0	0	0	12	0	0	0	0	0	0	0	Bacteria	Actinobacteriota	Acidimicrobiia	IMCC26256	NA	NA	NA	CGTTGTCCGGATTCATTGGGCGTAAAGAGCTCGTAGGCGGTTCGGTAAGTCGGGTGTGAAATCTCCACGCTCAACGTGGAGGGGCCACTCGATACTGCCGTGACTCGAGTCCGGTAGAGGAGTGTGGAATTCCCGGTGTAGCGGTGAAATGCGCAGATATCGGGAGGAACACCAGTAGCGAAGGCGGCACTCTGGGCCGGTACTGACGCTGAGGA
ASV_566	0	0	0	0	45	0	0	0	0	0	0	0	71	0	0	0	0	0	0	0	0	Bacteria	Planctomycetota	Planctomycetes	Gemmatales	Gemmataceae	NA	NA	CGTTGTTCGGAATCACTGGGCTTAAAGGGCGCGTAGGCGGCCGACCAAGTCCGGGGTGAAATCTTTCGGCTTAACCGGAAAAGGGCCTCGGAGACGGGTCGGCTGGAGGGAGGTAGGGGCAGCCGGAACTTCCGGTGGAGCGGTGAAATGCGTTGATATCGGAAGGAACGCCGGTGGCGAAAGCGGGCTGCTGGACCTCTTCTGACGCTGAGGCG
ASV_567	0	0	0	0	0	0	0	0	0	0	0	0	0	0	0	0	0	0	0	10	106	Bacteria	Proteobacteria	Alphaproteobacteria	Caulobacterales	Caulobacteraceae	Phenylobacterium	NA	CGTTGCTCGGAATTACTGGGCGTAAAGGGCGCGTAGGCGGATAGTTTAGTCAGAGGTGAAAGCCCAGGGCTCAACCCTGGAATTGCCTTTGATACTGGCTATCTTGAGTTCGGGAGAGGTGAGTGGAATGCCGAGTGTAGAGGTGAAATTCGTAGATATTCGGCGGAACACCAGTGGCGAAGGCGACTCACTGGCCCGATACTGACGCTGAGGCG
ASV_568	115	0	0	0	0	0	0	0	0	0	0	0	0	0	0	0	0	0	0	0	0	Bacteria	Chloroflexi	Anaerolineae	NA	NA	NA	NA	AACGTAGGAGGCAAGCGTTACCCGGATTTACTGGGCGTAAAGCGTGTGCAGGCGGCTCGGCAGGTCGGGCGTGAAAGCCCCTGGCTCAACTGGGGGAGGCCGTCCGAAACCGTCGGGCTTGAGCACCGGAGAGGGACGTGGAATTCCCGGTGGAGCGGTGAAATGCGTAGAGATCGGGAGGAACACCAGTGGGGAAGCCGGCCACCTGGCTCGTTCCTGACACTGAGGCGCGAAAGCGTGGGGAGC
ASV_569	0	115	0	0	0	0	0	0	0	0	0	0	0	0	0	0	0	0	0	0	0	Bacteria	Planctomycetota	Planctomycetes	Gemmatales	Gemmataceae	NA	NA	GACGAACCGTGCGAACGTTGTTCGGAATCACTGGGCTTAAAGGGCGCGTAGGCGGTTCTCCCAGTCCGGGGTGAAAGCGCTCGGCTTAACCGGGCCAGTGCCTTGGATACTGGAGAACTCGAGGGAGATAGGGGCAGGTGGAACTTCCGGTGGAGCGGTGAAATGCGTTGATATCGGAAGGAACGCCGGTGGCGAAAGCGGCCTGCTGGATCTCCACTGACGCTGAGGCGCGAAAGCCAGGGGAGC
ASV_570	0	0	0	0	49	0	0	0	0	0	50	0	16	0	0	0	0	0	0	0	0	Bacteria	Proteobacteria	Alphaproteobacteria	Acetobacterales	Acetobacteraceae	NA	NA	CGTTGCTCGGAATGACTGGGCGTAAAGGGCGCGTAGGCGGATGGCACAGTCAGATGTGAAATTCCCGGGCTTAACCTGGGGGCTGCATTTGATACGTGTGATCTAGAGTGAGGAAGAGGGTCGTGGAATTCCCAGTGTAGAGGTGAAATTCGTAGATATTGGGAAGAACACCGGTGGCGAAGGCGGCGACCTGGTCCTTGACTGACGCTGAGGCG
ASV_571	0	114	0	0	0	0	0	0	0	0	0	0	0	0	0	0	0	0	0	0	0	Bacteria	NA	NA	NA	NA	NA	NA	TACGTAGGAGGCAAGTGTTGTCCGGAGTACTGGGCGTAAAGCGTGTGTAGGCGGTGCGCTGCGTCTGTGGTGAAATCTCCCGGCTTACCTGGGAGGGGGCCGCAGATACGAGCGGACTTGAGGGCGTGAGAGGCGAGTAGAACTCCCGGTGGACCAGTGAAATGGGTAGAGATCGGGAAGAATACCAGTGGTGCAGACGGCTCGCTGGCGCGTACCTGACGCTGAGACACGAAAGCTTGGGGAGCA
ASV_572	0	0	44	0	0	41	7	0	0	0	0	11	0	11	0	0	0	0	0	0	0	Bacteria	Myxococcota	Polyangia	Polyangiales	Polyangiaceae	Pajaroellobacter	NA	CGTTGTTCGGAATTACTGGGCGTAAAGCGAGTGTAGGCGGTCTGCTAAGTCGGGTGTGAAAGCCCCGGGCTCAACTCGGGAAGTGCACTCGAAACTGGCAGGCTAGAGTACTGGAGAGGTTGGTGGAATTCTCGGTGTAGAGGTGAAATTCGTAGATATCGAGAGGAACACCGGTGGCGAAGGCGGCCAACTGGACAGATACTGACGCTGAGACT
ASV_573	0	0	0	0	37	0	0	0	0	0	0	0	17	0	0	0	32	28	0	0	0	Bacteria	Planctomycetota	Planctomycetes	Gemmatales	Gemmataceae	NA	NA	CGTTGTTCGGATTCACTGGGCTTAAAGGGCGCGTAGGCGGGCCGCCAAGTCTGTGGTGAAAGCCCCCGGCTTAACCGGGGAAGTGCCGTGGATACTGGCGGTCTCGAGGGGTGCAGGGGCATGTGGAACTTCCGGTGGAGCGGTGAAATGCGTAGATATCGGAAGGAACGCCGGTGGCGAAAGCGACGTGCTGGACACCTACTGACGCTGAGGCG
ASV_574	0	0	22	56	0	0	0	0	0	0	0	0	0	34	0	0	0	0	0	0	0	Bacteria	Bacteroidota	Bacteroidia	Chitinophagales	Chitinophagaceae	NA	NA	TGTGTCAGCGCCGCGGTAATACGGAGGGTGCAAGCGTTATCCGGATTCACTGGGTTTAAAGGGTGCGTAGGTGGGCAGGTAAGTCAGTGGTGAAATCTCCGAGCTTAACTCGGAAACTGCCGTTGATACTATTTGTCTTGAATATTGTGGAGGTAAGCGGAATATGTCATGTAGCGGTGAAATGCTTAGATATGACATAGAACACCAATTGCGAA
ASV_575	0	0	111	0	0	0	0	0	0	0	0	0	0	0	0	0	0	0	0	0	0	Bacteria	Chloroflexi	OLB14	NA	NA	NA	NA	CGTTGTCCGGATTTACTGGGCGTAAAGCGCCCGCAGGCGGCCAGGCAAGTCCAGGGTGAAATCTCCCGGCTCAACCGGGAGGGGTCCTTGGAAACTGCCTGGCTTGAGGCAGGGAGAGGGATGTGGAATTCCCGGTGTAGTGGTGAAATACGTAGATATCGGGAGGAACACCAGTGGCGAAGGCGGCATCCTGGCCCTGTCCTGACGCTCAAGGG
ASV_576	0	0	0	0	98	0	0	0	0	13	0	0	0	0	0	0	0	0	0	0	0	Bacteria	Actinobacteriota	Actinobacteria	Frankiales	Frankiaceae	Jatrophihabitans	NA	CGTTGTCCGGAATTATTGGGCGTAAAGAGCTCGTAGGCGGCTCGTCGCGTCGGCTGTGAAAACCTGGGGCTCAACCCCGGGCCTGCAGCCGATACGGGCAAGCTAGAATTCGGTAGGGGAGACTGGAATTCCTGGTGTAGCGGTGAAATGCGCAGATATCAGGAGGAACACCGGTGGCGAAGGCGGGTCTCTGGGCCGATATTGACGCTGAGGAG
ASV_577	0	0	0	0	81	0	0	0	0	0	0	0	30	0	0	0	0	0	0	0	0	Bacteria	Proteobacteria	Alphaproteobacteria	Reyranellales	Reyranellaceae	Reyranella	NA	CGTTGTTCGGAATTACTGGGCGTAAAGCGCGTGTAGGCGGTTGTCCAAGTCGGGTGTGAAAGCCTTGAGCTCAACTCAAGAAATGCACTCGGTACTGGGTGACTAGAGGACCGGAGAGGATAGTGGAATTCCCAGTGTAGTGGTGAAATACGTAGAGATTGGGAAGAACACCAGTGGCGAAGGCGGCTATCTGGACGGTTTCTGACGCTAAGACG
ASV_578	0	0	0	0	111	0	0	0	0	0	0	0	0	0	0	0	0	0	0	0	0	Bacteria	Proteobacteria	Alphaproteobacteria	Rhizobiales	Xanthobacteraceae	NA	NA	CGTTGCTCGGAATCACTGGGCGTAAAGCGCACGTAGGCGGATTGCTAAGTCAGGGGTGAAATCCTGGAGCTCAACTCCAGAACTGCCCTTGATACTGGCGATCTTGAGTCCGGGAGAGGTGAGTGGAACTGCGAGTGTAGAGGTGAAATTCGTAGATATTCGCAAGAACACCAGTGGCGAAGGCGGCTCACTGGCCCGGTACTGACGCTGAGGTG
ASV_579	0	0	110	0	0	0	0	0	0	0	0	0	0	0	0	0	0	0	0	0	0	Bacteria	Deinococcota	Deinococci	Thermales	Thermaceae	Meiothermus	NA	TGTGCAGCGCCGCGGTAATACGGAGGGTGCGAGCGTTACCCGGATTTACTGGGCGTAAAGGGCGTGTAGGCGGTCCTCTAAGTCCAAGGCTAAAGACTAGGGCTCAACCCTGGACCTGCCTCGGATACTGGAGGGCTCGACGGCTGGAGGGGGCAGCGGAATTTCCGGAGTAGCGGTGAAATGCGCAGATACCGGAAGGAACGCCAATAGCGAAG
ASV_580	0	0	0	0	34	0	0	0	0	6	8	0	32	0	0	0	7	18	0	0	5	Bacteria	Planctomycetota	Planctomycetes	Gemmatales	Gemmataceae	Gemmata	NA	CGTTGTTCGGAATCACTGGGCTTAAAGGGCGCGTAGGCGGGCGTCACAGTCCGCGGTGAAATCCCCCGGCTCAACCGGGGGACGGCCGCGGATACTGGGCGTCTCGAGGCGGGTAGGGGCGTGCGGAACACTAGGTGGAGCGGTGAAATGCGTTGATATCTAGTGGAACTCCGGTGGCGAAAGCGGCGCGCTGGACCCGATCTGACGCTGAGGCG
ASV_582	0	109	0	0	0	0	0	0	0	0	0	0	0	0	0	0	0	0	0	0	0	Bacteria	Acidobacteriota	Acidobacteriae	Acidobacteriales	Acidobacteriaceae (Subgroup 1)	Granulicella	NA	TACGAGGGGGGCAAGCGTTGTTCGGAATTATTGGGCGTAAAGGGTGCGTAGGCGGTTTGGCAAGTCTTATGTGAAATCTTCGGGCTCAACCCGAAGCCTGCATGAGAAACTGCCGGGCTTGAGTATGGGAGAGGTGAGTGGAATTTCCGGTGTAGCGGTGAAATGCGTAGATATCGGAAGGAACACCTGTGGCGAAAGCGGCTCACTGGACCATAACTGACGCTGATGCACGAAAGCTAGGGGAGC
ASV_583	0	0	0	0	0	0	0	0	9	0	0	0	0	0	56	17	0	0	0	0	27	Bacteria	WPS-2	NA	NA	NA	NA	NA	ATGTGTCAGCGCCGCGGTAAGACGTAGGGGGCGAGCGTTATTCGGAATCATTGGGCGTAAAGCGCTCGTAGGCGGATCAGCAAGTCGGTGAAGAAAGACCCGGGCTCAACTCGGGGAACGGCACCGATACTGTTGGTCTTGAGGCAATCAGAGGGTAATGGAATTCCCGGTGTAGCGGTGAAATGCGTAGATATCGGGAGGAACACCAGTGGCGA
ASV_584	108	0	0	0	0	0	0	0	0	0	0	0	0	0	0	0	0	0	0	0	0	Bacteria	Bacteroidota	Bacteroidia	Chitinophagales	Chitinophagaceae	NA	NA	TACGGAGGGTGCAAGCGTTATCCGGATTCACTGGGTTTAAAGGGTGCGTAGGAGGGCAGGTAAGTCAGTGGTGAAATCTTCGGGCTTAACTCGGAAACTGCCGTTGATACTATCTGTCTTGAATATTGTGGAGGTGAGCGGAATATGTCATGTAGCGGTGAAATGCTTAGATATGACATAGAACACCAATTGCGAAGGCAGCTCGCTACACATATATTGACTCTGAGGCACGAAAGCGTGGGGATC
ASV_585	0	108	0	0	0	0	0	0	0	0	0	0	0	0	0	0	0	0	0	0	0	Bacteria	Planctomycetota	Planctomycetes	Gemmatales	Gemmataceae	NA	NA	GACGAACCGTGCGAACGTTGTTCGGAATCACTGGGCTTAAAGGGCGCGTAGGCGGGTCACCAAGTCCGGGGTGAAATCTTTCGGCTTAACCGGAAAACTGCCTTGGATACTGGTGATCTTGAGGGAGGTAGGGGTCTGCGGAACTTCTGGTGGAGCGGTGAAATGCGTTGATATCAGAAGGAACGCCGGTGGCGAAAGCGGCGGACTGGACCTTCACTGACGCTGAGGCGCGAAAGCTAGGGGAGC
ASV_586	0	0	0	0	25	0	0	0	6	28	0	0	3	0	0	27	19	0	0	0	0	Bacteria	Planctomycetota	Planctomycetes	Gemmatales	Gemmataceae	NA	NA	CGTTGTTCGGAATCACTGGGCTTAAAGGGCGCGTAGGCGGGTCTCAAGTCAGGGGTGAAATCGCTCGGCTTAACCGGGCAAGTGCCTTTGATACTGGCGGTCTTGAGTGAGGTAGGGGCATGCGGAACTTCCGGTGGAGCGGTGAAATGTGTTGATATCGGAAGGAACGCCGGTGGCGAAAGCGGCATGCTGGACCTCTTCTGACGCTGAGGCGC
ASV_587	0	0	0	0	16	0	0	0	0	20	30	0	0	3	5	10	6	5	0	13	0	Bacteria	NA	NA	NA	NA	NA	NA	CGTTGTCCGGAATTACTGGGCGTAAAGCGCGCGTAGGCGGCGTGGTAAGCGTGCTGTGACAGGCCCCGGCTCAACTGGGGAGGGACGGTGCGGACTGCCATGCTGGGAGGAGTGTCGGAGAGGGACGTGGAATTCCCGGAGTAGTGGTGAAATACGTAGATCCCGGGAGGAACACCAGTGGCGAAGGCGGCGTCCTGGCCGATGACTGACGCTGA
ASV_589	0	0	0	0	0	0	0	0	0	0	0	0	0	0	0	0	107	0	0	0	0	Bacteria	Acidobacteriota	Holophagae	Subgroup 7	NA	NA	NA	CGTTATTCGGAATTATTGGGCGTAAAGGGCGCGTAGGCGGCCATGCGTGTCTTCCGTGAAATCCCTCGGCTTAACTGAGGACGTGCGGAAGAAACTGCAAGGCTTGAGTCCAGGAGAGGGGGGTGGAATTCCCAGTGTAGCGGTGAAATGCGTAGATATTGGGAGGAACACCGGTGGCGAAGGCGGCCCCCTGGACCGGTACTGACGCTGAGGCG
ASV_590	0	0	99	0	0	0	0	0	0	0	0	0	0	7	0	0	0	0	0	0	0	Bacteria	Proteobacteria	Alphaproteobacteria	Sphingomonadales	Sphingomonadaceae	Ellin6055	NA	CGTTGTTCAGAATTACTGGGCGTAAAGCGCACGTAGGCGGCTTCGCAAGTCAGAGGTGAAAGCCCGGAGCTTAACTCCGGAATTGCCTTTGAGACTGCGTCGCTAGAATCCGGGAGAGGTGAGTGGAATTCCGAGTGTAGAGGTGAAATTCGTAGATATTCGGAAGAACACCAGTGGCGAAGGCGGCTCACTGGACCGGTATTGACGCTGAGGTG
ASV_591	0	0	0	0	67	0	0	0	0	0	23	0	16	0	0	0	0	0	0	0	0	Bacteria	Actinobacteriota	Thermoleophilia	Solirubrobacterales	Solirubrobacteraceae	NA	NA	CGTTGTCCGGAATCATTGGGCGTAAAGAGCGTGTAGGCGGCTCGATAAGTCCGCTGTAAAAGTCCAGGGCTCAACCCTGGGATGCCGGTGGAAACTGTCGGGCTAGAGTCCGGGAGAGGCGAGTGGAATTCCTGGTGTAGCGGTGAAATGCGCAGATATCAGGAGGAACACCAATGGCGAAGGCAGCTCGCTGGAACGGTACTGACGCTGAGACG
ASV_592	0	0	0	0	56	0	0	0	0	0	9	0	0	0	0	0	6	35	0	0	0	Bacteria	Planctomycetota	BD7-11	NA	NA	NA	NA	CGTTGTTCGGAATCACTGGGCATAAAGCGCACGTAGGCGGCGACGTAAGTTGGGTGTGAAATCCCTCGGCCCAACCGAGGAACTGCGCCCAGTACTGCGTTGCTTGAGGATCAAAGGGGTGCATGGAATTCCCGGTGGAGCGGTGAAATGCGTTGATATCGGGAGGAACTCCGGCGGCGAAAGCGGTGCACTGGTTGATTTCTGACGCTGAGGTG
ASV_593	0	0	0	0	22	0	0	0	0	0	0	0	83	0	0	0	0	0	0	0	0	Archaea	Crenarchaeota	Nitrososphaeria	Nitrososphaerales	Nitrososphaeraceae	NA	NA	TGGTCGGGACGATTATTGGGCCTAAAGCATCCGTAGCCGGTTCTGCAAGTCTTCCGTTAAATCCAGCCGCTCAACGGATGGGCCGCGGAGGATACTACAGGACTAGGAGGCGGGAGAGGCAAGCGGTACTCAGTGGGTAGGGGTAAAATCCTTTGATCCATTGAAGACCACCAGTGGCGAAGGCGGCTTGCCAGAACGCGCTCGACGGTGAGGGA
ASV_594	0	0	0	0	0	0	0	0	0	0	0	0	0	0	0	3	19	63	0	15	5	Bacteria	Chloroflexi	Ktedonobacteria	Ktedonobacterales	Ktedonobacteraceae	NA	NA	CGTTGTCCGGAGTTACTGGGCGTAAAGGGCGTGCAGGCGGTCAGCCAAGTTTGCCGTGACAGTGCCCGGCTTAACCGGGCAAGGGGTGGCGAGGACTGGTTGACTTGAGGGCCGGAGAGGGACACAGAATTCCGGGTGGAGTGGTGAAATGCGTAGATATCCGGAGGAATACCAAAGGCGAAGGCAGTGTCCTGGAAGGTACCTGACGCTGAGGC
ASV_595	0	104	0	0	0	0	0	0	0	0	0	0	0	0	0	0	0	0	0	0	0	Bacteria	Planctomycetota	Planctomycetes	Isosphaerales	Isosphaeraceae	NA	NA	GACGAACCGTGCGAACGTTATTCGGAATCACTGGGCTTAAAGCGCGTGTAGGCGGGTGGGCACGTCGGCCGCTGAAATCCCCCGGCTCAACCGGGGAACGGGCGCCGATACGACCCGCCTGGAGGGACGTAGGGGGACCTGGAACTTCCGGTGGAGCGGTGAAATGCGTTGAGATCGGAAGGAACGCCCGTGGCGAAAGCGAGGTCCTGGACGTCTGCTGACGCTGAGACGCGAAAGCCAGGGGAG
ASV_596	0	0	0	0	0	14	0	0	0	0	0	0	0	0	0	0	0	0	0	9	81	Bacteria	Actinobacteriota	Acidimicrobiia	IMCC26256	NA	NA	NA	CGTTGTCCGGATTCATTGGGCGTAAAGAGCTCGTAGGCGGTTCGCTAAGTCAGGTGTGAAATCTCCACGCTCAACGTGGAGGGGCCACCTGATACTGGCGTGACTCGAGTCCGGTAGGGGAGTGTGGAATTCCCGGTGTAGCGGTGAAATGCGCAGATATCGGGAGGAACACCAGTGGCGAAGGCGGCACTCTGGGCCGGAACTGACGCTGAGGA
ASV_597	0	0	0	0	0	13	0	0	0	0	0	0	0	0	0	0	0	0	0	5	85	Bacteria	Actinobacteriota	Thermoleophilia	Gaiellales	NA	NA	NA	CGTTGTCCGGATTTATTGGGCGTAAAGAGCGTGTAGGCGGTTTGGTAGGTCCGCTGTGAAAACTCGAGGCTCAACCTCGAGACGCCGGTGGAAACCATCAGACTAGAGTCCGGAAGAGGAGAGTGGAATTCCTGGTGTAGCGGTGAAATGCGCAGATATCAGGAAGAACACCCGTGGCTAAGGCGGCTCTCTAGTACGGTACTGACGCTGAGACG
ASV_598	0	0	61	0	0	0	17	0	0	0	0	0	0	24	0	0	0	0	0	0	0	Bacteria	Proteobacteria	Alphaproteobacteria	Rhizobiales	Xanthobacteraceae	Rhodopseudomonas	NA	CGTTGCTCGGAATCACTGGGCGTAAAGGGTGCGTAGGCGGGTTCTTAAGTCAGAGGTGAAATCCTGGAGCTCAACTCCAGAACTGCCTTTGATACTGAGAGTCTTGAGTATGACAGAGGTGAGTGGAACTGCGAGTGTAGAGGTGAAATTCGTAGATATTCGCAAGAACACCAGTGGCGAAGGCGGCTCACTGGGTCATTACTGACGCTGAGGCA
ASV_599	0	0	0	0	0	0	0	72	0	0	0	0	0	30	0	0	0	0	0	0	0	Bacteria	Acidobacteriota	Acidobacteriae	Bryobacterales	Bryobacteraceae	Bryobacter	NA	CGTTGTTCGGAATTACTGGGCGTAAAGAGTGTGTAGGCGGTGCTCTAAGTTTGGTGTGAAATCTCCCGGCTTAACTGGGAGGGTGCGCCGAAAACTGGAATGCTTGAACGTGGGAGAGGAAAGCGGAATTCCTGGTGTAGCGGTGAAATGCGTAGATATCAGGAGGAACACCTGCGGTGTAGACGGCTTTCTGGACCATTGTTGACGCTGAGACA
ASV_600	0	0	0	0	0	0	0	0	0	0	0	0	0	0	0	0	0	102	0	0	0	Bacteria	Proteobacteria	Gammaproteobacteria	Burkholderiales	Alcaligenaceae	Derxia	NA	CGTTAATCGGAATTACTGGGCGTAAAGCGTGCGCAGGCGGTTTCGTAAGACAGATGTGAAATCCCCGGGCTCAACCTGGGAACTGCATTTGTGACTGCGAGGCTAGAGTGTGTCAGAGGGGGGTGGAATTCCACGGTGTAGCAGTGAAATGCGTAGAGATGTGGAGGAACACCGATGGCGAAGGCAGCCCCCTGGGATAACACTGACGCTCAGGC
ASV_601	0	0	0	0	0	0	0	0	0	0	0	0	101	0	0	0	0	0	0	0	0	Bacteria	Proteobacteria	Alphaproteobacteria	Rhizobiales	Beijerinckiaceae	Methylovirgula	NA	TGTGCAGCGCCGCGGTAATACGAAGGGGGCTAGCGTTGTTCGGAATCACTGGGCGTAAAGCGCACGTAGGCGGATTCTTAAGTCAGGGGTGAAATCCCGAGGCTCAACCTCGGAACTGCCTTTGATACTGGGGATCTCGAGTCCGGGAGAGGTGAGTGGAATTGCGAGTGTAGAGGTGAAATTCGTAGATATTCGCAAGAACACCAGTGGCGAAG
ASV_602	100	0	0	0	0	0	0	0	0	0	0	0	0	0	0	0	0	0	0	0	0	Bacteria	Deinococcota	Deinococci	Deinococcales	Deinococcaceae	Deinococcus	NA	TACGGAGGGTGCAAGCGTTACCCGGAATCACTGGGCGTAAAGGGCGTGTAGGCGGGACCATCAGTCTGGTTTTAAAGACCGGGGCTCAACCCCGGGGATGGACTGGATACTGTGGTTCTAGACGGATGGAGAGGCAACCGGAATTCCTGGTGTAGCGGTGGAATGCGTAGATACCAGGAGGAACACCAATGGCGAAGGCAGGTTGCTGGACATTTTGTGACGCTGAGGCGCGAAAGTGTGGGGAGC
ASV_603	0	0	0	0	100	0	0	0	0	0	0	0	0	0	0	0	0	0	0	0	0	Bacteria	Chloroflexi	AD3	NA	NA	NA	NA	TGTGCAGCGCCGCGGTAATACGTAGGGGGCAAGCGTTACCCGGATTTACTGGGCGTAAAGCGCGTGTAGGTGGTTGGTTAAGCGTGATGTGAAAGCTTCCGGCTCAACCGGAAAACTGCATTGCGAACTGGCTGACTTGAGGACAGGAGAGGGAAGCGGAATTCCCGGTGTAGCGGTGAAATGCGTAGATATCGGGAGGAACACCAGAGGCGAAG
ASV_604	0	0	0	0	50	0	0	0	0	0	0	0	0	0	0	0	0	0	0	0	50	Bacteria	Acidobacteriota	Acidobacteriae	Acidobacteriales	NA	NA	NA	CGTTGTTCGGAATTATTGGGCGTAAAGGGCGCGTAGGCGGTGCGGTAAGTCACCTGTGAAACCTCTAGGCTTAACCTAGAGCCTGCAGGCGAAACTGCCGTGCTTGAGGGTGGGAGAGGTGCGTGGAATTCCCGGTGTAGCGGTGAAATGCGTAGATATCGGGAGGAACACCTGTGGCGAAAGCGGCGCACTGGACCACATCTGACGCTGAGGCG
ASV_605	0	0	0	0	41	0	0	0	0	0	59	0	0	0	0	0	0	0	0	0	0	Bacteria	Myxococcota	Polyangia	Haliangiales	Haliangiaceae	Haliangium	NA	CGTTGCTCGGAATCATTGGGCGTAAAGCGCACGTAGGCGGTTTGTTAAGTCGGGTTGTGAAAGCCCTGGGCTCAACCCAGGAAGTGCACTCGAAACTGGCAAGCTTGAGTACGGAAGAGGGTCTCGGAATTCCCGGTGTAGAGGTGAAATTCGTAGATATCGGGAGGAACACCAGTGGCGAAGGCGGAGACCTGGGCCGATACTGACGCTGAGGT
ASV_606	0	0	0	0	11	0	0	0	0	31	0	0	12	0	0	9	33	4	0	0	0	Bacteria	Acidobacteriota	Acidobacteriae	Solibacterales	Solibacteraceae	Candidatus Solibacter	NA	CGTTGTTCGGAGTTACTGGGCGTAAAGGGTGTGTAGGTGGTTGTCTAAGTTTGGTGTGAAATCTCCCGGCTTAACCGGGAGGGTGCGCCGAAAACTGGATGACTAGAGTGCAGGATGGGAGAGTGGAATTCCTGGTGTAGCGGTGAAATGCGTAGATATCAGGAGGAACACCGGCGGTGTAGACGGCTCTCTGGACTGTAACTGACACTGAAACA
ASV_607	0	0	0	0	0	0	0	0	0	0	0	0	0	0	0	0	0	86	0	0	14	Bacteria	Proteobacteria	Gammaproteobacteria	WD260	NA	NA	NA	CGTTAATCGGAATTACTGGGCGTAAAGCGCGCGTAGACGGTTTTGTAAGTCAGATGTGAAATCCCCGGGCTCAACCTGGGAACTGCATTTGATACTGCATGGCTAGAGTACGGTAGAGGGAAGTGGAATTTCCGGTGTAGCGGTGAAATGCGTAGATATCGGAAGGAACACCAGTGGCGAAAGCGACTTCCTGGACCAGTACTGACGTTCATGTG
ASV_608	0	0	4	0	0	4	4	0	12	44	10	0	0	0	18	0	0	0	0	0	3	Bacteria	NA	NA	NA	NA	NA	NA	CGTTACCCGGATTCACTGGGCGTAAAGGGCGCGTAGGCGGCTAGGCGCGTCGGGCGTGAAAGCCTCGGGCTCAACCCGGGGAGGCCGTCCGATACGGCCTGGCTTGAGCACGGTAGAGGGGGGCGGAATTGCCGGTGTAACGGTGAAATGTGTAGAGCTCGGCAGGAACTCCAGTGGGGAAGCCGGCCCCCTGGGCCGTCGCTGACGCTGAGGCG
ASV_609	0	0	4	19	0	0	5	28	0	0	0	27	0	16	0	0	0	0	0	0	0	Bacteria	Proteobacteria	Alphaproteobacteria	Elsterales	NA	NA	NA	CGTTGTTCGGAATTACTGGGCGTAAAGGGCGCGCAGGCGGCCCTAGAAGTCAGGCGTGAAAGCCCCGGGCTCAACCTGGGAATTGCGCTTGATACTCTAGGGCTAGAGTTCGGGAGAGGAGAGTGGAATTCCCAGTGTAGAGGTGAAATTCGTAGATATTGGGAAGAACACCGGTGGCGAAGGCGGCTCTCTGGACCGACACTGACGCTGAGGCG
ASV_610	0	0	0	32	0	0	8	50	0	0	0	0	0	9	0	0	0	0	0	0	0	Bacteria	Proteobacteria	Alphaproteobacteria	Rhizobiales	Devosiaceae	Devosia	NA	CGTTGTTCGGATTTACTGGGCGTAAAGCGCACGTAGGCGGATTGTTAAGTCAGGGGTGAAATCCTGGAGCTCAACTCCAGAACTGCCTTTGATACTGGCAATCTTGAGTCCGGAAGAGGTGAGTGGAACTCCTAGTGTAGAGGTGGAATTCGTAGATATTAGGAAGAACACCAGTGGCGAAGGCGGCTCACTGGTCCGGTACTGACGCTGAGGTG
ASV_611	0	0	0	0	0	0	0	0	0	2	0	0	0	0	14	0	20	63	0	0	0	Bacteria	Proteobacteria	Gammaproteobacteria	Gammaproteobacteria Incertae Sedis	Unknown Family	Acidibacter	NA	ATGTGTCAGCGCCGCGGTAATACAGAGGGTGCGAGCGTTAATCGGAATTACTGGGCGTAAAGCGTGCGTAGACGGTTATGTAAGTCGGGTGTGAAAGCCCCGGGCTCAACCTGGGAATGCCATTCGAAACTGCATAGCTAGGGTGCGGAAGAGGGAAGCGGAATTTCAGGTGTAGCGGTGAAATGCGTAGATATCTGAAGGAACACCAGTGGCGA
ASV_612	0	0	0	0	0	0	0	0	0	0	0	0	0	0	6	0	0	0	55	33	5	Bacteria	Chloroflexi	TK10	NA	NA	NA	NA	CGTTGTCCGGATTTATTGGGCGTAAAGCGCGCGTAGGCGGTGCGGCAAGTCGGCCGTGAAATCTCCCGGCTCAACCGGGAGGGGTCGGGCGAGACTGCCGCGCTGGAGGCAGGTAGAGGGCCGTGGAATTCCGGGTGTAGTGGTGGAATGCGTAGAGATCCGGAGGAACACCGGTGGCGAAGGCGGCGGCCTGGGCCTGGCCTGACGCTGAGGCG
ASV_613	98	0	0	0	0	0	0	0	0	0	0	0	0	0	0	0	0	0	0	0	0	Bacteria	Armatimonadota	Fimbriimonadia	Fimbriimonadales	NA	NA	NA	GACGTAGGGGGCGAGCGTTGTCCGGATTCACTGGGCGTAAAGAGCGCGTAGGCGGCCTGCTTAGTCAGGAGTGAAATCTCCAGGGCTCAACCCGGAAACTGCTTCTGATACTGGCAGGCTCGAGGGTCAGAGGGGTGATTGGAATTCCCGGTGTAGCGGTGACATGCATTGAGATCGGGAGGAACACCCGTGGCGAAGGCGGATCACTGGCTGATACCTGACGCTGAGGCGCGAAAGCGTGGGGAG
ASV_614	98	0	0	0	0	0	0	0	0	0	0	0	0	0	0	0	0	0	0	0	0	Bacteria	NA	NA	NA	NA	NA	NA	TACGTAGGGGGCGAGCGTTGTCCGGATTCACTGGGCGTAAAGAGCTCGTAGGCGGCTACGGAAGTCGGCTGTGAAAGCCCGGGGCTCAACCCCGGGAGGCCAGTCGATACTCCGTGGCTAGAGGACGGCAGAGGGAGATGGAATTCCCGGTGTAGCGGTGAAATGCGCAGATATCGGGAGGAACACCAGTGGCGAAGGCGGTCTCCTGGGCCGTTCCTGACGCTGAGGAGCGAAAGCTGGGGGAGC
ASV_615	0	98	0	0	0	0	0	0	0	0	0	0	0	0	0	0	0	0	0	0	0	Bacteria	Chloroflexi	NA	NA	NA	NA	NA	TACGTAGGTGGCGAGCGTTGTCCGGATTTATTGGGCGTAAAGCGCGCGCAGGCGGCCGGATCAGTCCGCGGTGAAATCTCCCTGGCTCAACCGGGAGGGGGCCGTGGAGACTGTCTGGCTGGAGGGACCTAGAGGCCGGTGGAATTCCCGGTGTAGTGGTGAAATGCGTAGAGATCGGGAGGAACACCCGTGGCGAAGGCGGCCGGCTGGGGGTGCCCTGACGCTGAGGCGCGAAAGCGTGGGGAG
ASV_616	0	0	0	0	63	0	0	0	0	0	0	0	35	0	0	0	0	0	0	0	0	Bacteria	Chloroflexi	NA	NA	NA	NA	NA	CGTTATCCGGAATTACTGGGCGTAAAGGGCGTCTAGGCGGGAGAGCAAGCGGGGTGTGAAAGCTTCCAGCTTAACTGGGAGAGTGCGCTCCGAACTACTGATCTAGAGGGTGGGCGAAGGGGGTGGAATTCCCGGTGGAGTGGTGAAATGCGTAGAGATCGGGAGGAACACCAGAGGCGCAAGCGGCCCCCTAGCCTATACCTGACGCCTGAAGC
ASV_617	0	0	0	0	49	0	0	0	11	0	0	0	0	0	0	0	0	38	0	0	0	Bacteria	Chloroflexi	Chloroflexia	NA	NA	NA	NA	CGTTGTCCGGAATACTGGGCGTAAAGCGCGCGTAGGCGGGGTATCGCGTCGGCGGTGAAAGCCCCCGGCTCACCCGGGGGAGGGCCGCCGAGACGGATGCTCTTGGAGGGCGGTAGGGGCCGGTGGAACGCCCGGAGTAGCGGTGAAATGCGTTGAGATCGGGCAGAACACCAGTGGCGAAGGCGGCCGGCTGGGCCGACCCTGACGCTGAGGCG
ASV_618	0	0	0	0	0	0	0	0	0	98	0	0	0	0	0	0	0	0	0	0	0	Bacteria	Actinobacteriota	Thermoleophilia	Solirubrobacterales	Solirubrobacteraceae	Conexibacter	NA	CGTTGTCCGGAATCATTGGGCGTAAAGAGCGTGTAGGCGGCTCGATTAGTCCGCTGTGAAAGTCCAGGGCTCAACCCTGGAATGCCGGTGGATACTGTCGGGCTAGAGTTCGGAAGAGGCGAGTGGAATTCCTGGTGTAGCGGTGAAATGCGCAGATATCAGGAGGAACACCAATGGCGAAGGCAGCTCGCTGGGACGATACTGACGCTGAGACG
ASV_619	0	0	0	71	0	0	0	26	0	0	0	0	0	0	0	0	0	0	0	0	0	Bacteria	Bacteroidota	Bacteroidia	Cytophagales	Amoebophilaceae	Candidatus Amoebophilus	NA	CGTTATCCGGATTTACTGGGTTTAAAGGGTGCGTAGGCGCTCTTTAAGTCAGTGGTGAAATCCTAGTGCTTAACACTAGAAATGCCATTGAAACTAAAGAGCTTGAATCAAGGAGAGGTAAGCAGAATTTATAGTGTAGCAGTGAAATGCTTAGATACTATAAGGAATACCAACAGCGAAGGCAGCTTACTGGCCTTGTATTGACGCTGAGGCAC
ASV_620	0	0	0	0	0	0	0	32	0	0	0	0	0	65	0	0	0	0	0	0	0	Bacteria	Actinobacteriota	Actinobacteria	Micrococcales	Dermacoccaceae	Demetria	NA	CGTTGTCCGGAATTATTGGGCGTAAAGAGCTTGTAGGCGGTTTGTCGCGTCTGCTGTGAAAGCCCGGGGCTTAACTCCGGGTCTGCAGTGGGTACGGGCAGGCTAGAGTATGGTAGGGGAGACTGGAATTCCTAGTGTAGCGGTGAAATGCGCAGATATTAGGAGGAACACCGATGGCGAAGGCAGGTCTCTGGGCCATTACTGACGCTGAGAAG
ASV_621	0	0	0	0	0	0	0	60	0	0	0	0	0	37	0	0	0	0	0	0	0	Bacteria	Proteobacteria	Alphaproteobacteria	Acetobacterales	Acetobacteraceae	NA	NA	CGTTGCTCGGAATGACTGGGCGTAAAGGGCGCGTAGGCGGTTCACACAGTCGGGCGTGAAATTCCTGGGCTCAACCTGGGGGCTGCGCTTGAGACGTGTGGGCTAGAGTTTGGAAGAGGGTCGTGGAATTCCCAGTGTAGAGGTGAAATTCGTAGATATTGGGAAGAACACCGGTGGCGAAGGCGGCGACCTGGTCCTTGACTGACGCTGAGGCG
ASV_622	0	0	0	0	0	0	0	0	9	0	0	0	0	0	0	0	65	23	0	0	0	Bacteria	Chloroflexi	Anaerolineae	SBR1031	NA	NA	NA	ATGTGTCAGCGCCGCGGTAAAACGTAGGTGGCAAGCGTTATCCGGATTTACTGGGCGTAAAGCGTGTGCAGATGGGGCGGTAAGTGGTGTATGAAAGCGCCAAGCTTAACTTGGCAGGGGTATGCCAGACTGCCGTTCTAGAGACAGGGAGAGGGACGTGGAATGCCGGGTGTAGTGGTGAAATGCGTAGAGCTCCGGCAGAACCTCAGAGGCGA
ASV_623	0	0	0	0	0	0	0	0	0	0	0	0	0	0	30	67	0	0	0	0	0	Bacteria	Chloroflexi	Ktedonobacteria	B12-WMSP1	NA	NA	NA	CGTTGTCCGGAATTACTGGGCGTAAAGAGCGCGTAGGCGGCACGGTACGACACCTGTGAAAGCCCCCGGCTCAACTGGGGAGAGTCAGGTGTAACGGCCGAGCTAAGAGTGCAGGAGAGGGAAGTGGAACTCCGGGAGTAGCGGTGAAATGCGTAGATACCCGGAGGAACACCAGTGGCGAAGGCGGCTTCCTGGTCTGCGACTGACGCTGTGGC
ASV_624	0	0	0	0	0	0	0	0	0	0	0	0	34	0	36	27	0	0	0	0	0	Bacteria	NA	NA	NA	NA	NA	NA	CGTTGTTCGGAATACTGGGCGTAAAGCGTGCGTAGGCGGACTTGTAAGTCGAGGTTGAAATATCCGGGCTCAACTCGGGGCACGGCCTTGATACTGCAAGTCTTGAGTCAAGTAGAGGGTAGTGGAATTCCCGGTGTAGCGGTGAAATGCGTAGATATCGGGAGGAACACCAGTGGCGAAGGCGGCTACCTGGGCTTGTTCTGACGCTGAGGCAC
ASV_625	0	0	0	0	54	0	0	0	0	0	0	0	42	0	0	0	0	0	0	0	0	Bacteria	Planctomycetota	Planctomycetes	Gemmatales	Gemmataceae	NA	NA	TGTGTCAGCGCCGCGGTAAGACGAACCGTGCAAACGTTGTTCGGAATCACTGGGCTTAAAGGGCGCGTAGGCGGCTTGCCAAGTCAGGGGTGAAATCTTTCGGCTTAACCGGAAAAGTGCTTCTGATACTGGCGAGCTTGAGGGAGATAGGGGCATGCGGAACTTCCGGTGGAGCGGTGAAATGCGTTGATATCGGAAGGAACGCCGGTGGCGAA
ASV_627	0	0	0	0	0	0	0	0	13	0	0	0	0	0	0	0	0	83	0	0	0	Bacteria	Acidobacteriota	Acidobacteriae	Acidobacteriales	NA	NA	NA	CGTTGTTCGGAATTATTGGGCGTAAAGGGCGCGTAGGCGGTGCGGTAAGTCACCTGTGAAACCTCTAGGCTCAACCTAGAGCCTGCAGGCGAAACTGCCGTGCTTGAGGGTGGGAGAGGTGCGTGGAATTCCCGGTGTAGCGGTGAAATGCGTAGATATCGGGAGGAACACCTGTGGCGAAAGCGGCGCACTGGACCACTTCTGACGCTGAGGCG
ASV_628	0	0	0	0	0	0	0	0	30	0	23	0	0	0	0	0	0	0	0	0	43	Bacteria	Proteobacteria	Alphaproteobacteria	Rhizobiales	Xanthobacteraceae	NA	NA	CGTTGCTCGGAATCACTGGGCGTAAAGCGCACGTAGGCGGCTTGTTAAGTCAGGGGTGAAATCCTGGAGCTCAACTCCAGAACTGCCTTTGATACTGGCGAGCTTGGAGTCCGGGAGAGGTGAGTGGAACTGCGAGTGTAGAGGTGAAATTCGTAGATATTCGCAAGAACACCAGTGGCGAAGGCGGCTCACTGGCCCGGTACTGACGCTGAGGT
ASV_629	0	0	0	0	46	0	0	0	0	0	0	0	12	0	0	0	19	15	0	3	0	Bacteria	Myxococcota	Myxococcia	Myxococcales	Myxococcaceae	P3OB-42	NA	CGTTGCTCGGAATTATTGGGCGTAAAGCGCGTGTAGGCGGTCTGTTAAGTCGGTTGTGAAAGCCCACGGCTCAACCGTGGAAGTGCGTCCGAAACTGGCAGACTGGAGTCCCGACGAGGATAGCGGAATTCCCAGTGTAGAGGTGAAATTCGTAGATATTGGGAGGAACACCGGTGGCGAAGGCGGCTATCTGGGAGGGTACTGACGCTGAGACG
ASV_630	0	0	17	0	0	33	0	0	0	0	0	0	0	44	0	0	0	0	0	0	0	Bacteria	Chloroflexi	Chloroflexia	Thermomicrobiales	Thermomicrobiaceae	Sphaerobacter	NA	CGTTGTCCGGAGTTACTGGGCGTAAAGGGCGCGTAGGCGGTTGCCCGCGTCGCACGTGAAAGCCCCCGGCTCAACCGGGGAGGGTCGTGCGAGACGGGGCAACTGGAGGCAGGGAGAGGCTGGTGGAATTCCCGGTGTAGTGGTGAAATGCGTAGAGATCGGGAGGAACACCAGTGGCGAAGGCGGCCTTCTGGACCAGCACTGACACTCAAGCA
ASV_631	0	0	0	0	73	0	0	0	0	0	11	0	10	0	0	0	0	0	0	0	0	Bacteria	RCP2-54	NA	NA	NA	NA	NA	CGTTGTTCGGATTGACTGGGCGTAAAGGGCGTGTAGGCGGTTGGTCAAGTCTGCTGTGAAAGCCCGGGGCTTAGCCCCGGAAGTGCAGTGGAAACTAGCCAGCTAGAGCGCGAGAGAGGAGGGTGGAATTCCTGGTGTAGCGGTGAAATGCGTAGATATCAGGAGGAACACCGGCGGCGAAGGCGGCCCTCTGGCTCGTTGCTGACGCTGAGACG
ASV_632	0	0	0	0	0	16	0	0	0	0	0	67	0	11	0	0	0	0	0	0	0	Bacteria	GAL15	NA	NA	NA	NA	NA	CGTTGCCCGGATTTACTGGGCGTAAAGCGGGTGTAGGCGGCCGGGTAAGTCCCGTGTGAAAGCCCACGGCTCAACCGTGGGACGTCGCGGGAAACTGCCCGGCTTGAGGGCAGCAGAGGGTGGTGGAATTCCCGGTGTAGCGGTGAAATGCGTAGAGATCGGGAGGAACGCCAGTGGCGAAGGCGGCCACCTGGGCTGTCCCTGACGCTCAGACC
ASV_633	84	9	0	0	0	0	0	0	0	0	0	0	0	0	0	0	0	0	0	0	0	Bacteria	Acidobacteriota	Blastocatellia	Pyrinomonadales	Pyrinomonadaceae	RB41	NA	TACGAAGGGAGCAAGCGTTGTTCGGATTTACTGGGCGTAAAGGGCGCGTAGGCGGCGTGACAAGTCGGTTGTGAAATCTCGAAGCTCAACTTCGAGCGGTCAACCGATACTGTCGTGCTAGAGTGCAGAAGGGGCAACTGGAATTCTCGGTGTAGCGGTGAAATGCGTAGATATCGAGAGGAACACCTGCGGCGAAGGCGGGTTGCTGGGCTGACACTGACGCTGAGGCGCGAAAGCTAGGGGAGC
ASV_634	0	0	0	0	77	0	0	0	0	0	0	0	16	0	0	0	0	0	0	0	0	Bacteria	Planctomycetota	Planctomycetes	Gemmatales	Gemmataceae	NA	NA	CGTTATTCGGAATCACTGGGCATAAAGGGCGCGTAGGCGGTCGTCAAGTCTGGGGTGAAATCTTTCGGCTCAACCGAAAAAGTGCCTTGGATAACTGGCCGGCTGGAGGGAGGTAGGGGTCGATGGAACTTCCGGTGGAGCGGTGAAATGCGTAGATATCGGAAGGAACACCGATGGCGAAAGCAATCGACTGGACCTTTTCTGACGCTGAGGCG
ASV_635	0	0	0	0	0	0	0	0	0	0	0	0	0	0	23	70	0	0	0	0	0	Bacteria	Actinobacteriota	Acidimicrobiia	IMCC26256	NA	NA	NA	CGTTGTCCGGATTTATTGGGCGTAAAGAGCTCGTAGGCGGTTTGGTAAGTCGGATGTGAAATCTCCACGCTCAACGTGGAGGCGCCATTCGAAACTGCCATGACTTGAGTCCGGTAGGGGAGTGTGGAATTTCCGGTGTAGCGGTGAAATGCGCAGAGATCGGAAGGAACACCCGTAGCGAAGGCGGCACTCTGGGCCGGTACTGACGCTGAGGA
ASV_636	0	0	0	0	0	0	0	0	0	0	0	0	0	0	0	0	0	93	0	0	0	Bacteria	Proteobacteria	Alphaproteobacteria	Rickettsiales	NA	NA	NA	CGTTATTCGTCTTTACTGGGCGTAAAGGGTTCGTAGGCGGCGGTTAAACTGGTTAGCACGACATTTCACAATTTATTTGTATTTTGTGCTTTATCAGCATCTGCTTGAATTTAGTGGAGGTTTTTGGTACCTGCGAAGGAGAGGTGAAATTCGTTGATAGTGTTAGGGACCACCGATGGCGAAGGCAAAAAACCATGCTAAATTGACGCTGAGGG
ASV_637	0	0	0	0	0	0	0	0	23	33	0	0	0	0	0	36	0	0	0	0	0	Bacteria	Planctomycetota	Planctomycetes	Gemmatales	Gemmataceae	NA	NA	ATGTGTCAGCGCCGCGGTAAGACGAACCGTGCAAACGTTGTTCGGATTCACTGGGCTTAAAGGGCGCGTAGGCGGCTCGCCAAGTCAGGGGTGAAATCTTTCGGCTTAACCGGAAAACAGCTTCTGATACTGGCGGGCTAGAGGGAGGTAGGGGCATGTGGAACTTCCGGTGGAGCGGTGAAATGCGTAGATATCGGAAGGAACGCCGGTGGCGA
ASV_638	72	19	0	0	0	0	0	0	0	0	0	0	0	0	0	0	0	0	0	0	0	Bacteria	Gemmatimonadota	Gemmatimonadetes	Gemmatimonadales	Gemmatimonadaceae	NA	NA	TACAGAGGGTGCGAGCGTTGTCCGGAATCACTGGGCGTAAAGGGCGCGTAGGCGGCCTGATAAGTAGGGGGTGAAATCCCGTGGCTCAACCGCGGGGCTGCCTTCTAGACTGTCGGGCTAGAGCACGGTAGAGGCGGATGGAATTCCCGGTGTAGCGGTGGAATGCGTAGAGATCGGGAAGAACACCGGTGGCGAAGGCGGTCCGCTGGGCCGTTGCTGACGCTGAGGCGCGACAGCGTGGGGAGC
ASV_639	0	0	0	0	41	0	0	0	0	0	12	0	38	0	0	0	0	0	0	0	0	Bacteria	Bacteroidota	Bacteroidia	Chitinophagales	Chitinophagaceae	Flavisolibacter	NA	CGTTATCCGGATTCACTGGGTTTAAAGGGTGCGTAGGAGGGCAGGTAAGTCAGTGGTGAAATCCCCGAGCTTAACTTGGGAACTGCCGTTGATACTATCTGTCTTGAATATCGTGGAGATGAGCGGAATATGTCATGTAGCGGTGAAATGCTTAGATATGACATAGAACACCAATTGCGAAGGCAGCTCGTTACACGAATATTGACTCTGAGGCA
ASV_640	0	0	0	0	0	0	43	0	11	0	2	0	8	0	0	0	0	7	0	6	14	Bacteria	Dependentiae	Babeliae	Babeliales	Vermiphilaceae	NA	NA	CGTTATTCGGATTTACTGGGCGTAAAGGGTGTGTAGGCGACAATTCAAGTCCATTGTTAAATATCTCGGCCTAACCGGGAAGGTGCGATGGATACTGATTTGATAGAGATTGGAAGAGAGAAGTGGAATTCTCGGAGTAGCGGTAAAATGCGTAGATATCGAGAGGAACACCGATGGCGAAGGCAGCTTCTTGGTCCACATCTGACGCTGATACA
ASV_641	0	0	0	0	0	0	0	0	0	0	91	0	0	0	0	0	0	0	0	0	0	Bacteria	Chloroflexi	AD3	NA	NA	NA	NA	GATGTGTCAGCGCCGCGGTAATACGTAGGGGGCAAGCGTTACCCGGATTTACTGGGCGTAAAGCGCGTGTAGGTGGTTGGTTAAGCGTGATGTGAAAGCTTCCGGCTCAACCGGAAAACTGCATTGCGAACTGGCTGACTTGAGGACAGGAGAGGGAAGCGGAATTCCCGGTGTAGCGGTGAAATGCGTAGATATCGGGAGGAACACCAGAGGCG
ASV_642	0	0	0	0	0	0	0	0	0	0	0	91	0	0	0	0	0	0	0	0	0	Bacteria	NA	NA	NA	NA	NA	NA	TGTTCATCATGCCTCGCATTCGTGCAAGCTTGCATCCTGAACCGATCCTCAATGTGCAAGGAAAGTTGGACATGAATCCCACGATGCTTGTGGTTTTCTTGGCATCGCTTGCCGGCTTCACGGGTTTGTATTACTGGATGTGGAAGCTGCACGTGAAGGTGCAGACATTGGAACTTCATCGTCAGAACTAAGGAGTGTTCGTGGCAGACTTTCTT
ASV_643	0	0	0	0	0	0	0	0	0	0	0	0	0	0	0	23	57	11	0	0	0	Archaea	Crenarchaeota	Nitrososphaeria	Nitrosotaleales	Nitrosotaleaceae	Candidatus Nitrosotalea	NA	TGGTCAGGACGTTTATTGGGCCTAAAGCATCCGTAGCCGGCTCTGCAAGTCTTCGGTTAAATCCACCTGCTCAACAGATGGGCTGCTGGAGATACTACAGAGCTAGGGAGTGGGAGAGGCAGACGGTATTCAGTGGGTAGGGGTAAAATCCTCTGATCCATTGAGGACCACCAGTGGCGAAGGCGGTCTGCCAGAACACGTTCGACGGTGAGGGA
ASV_644	0	0	0	0	0	0	0	0	0	0	0	0	0	0	0	0	0	0	91	0	0	Archaea	Crenarchaeota	Nitrososphaeria	Caldiarchaeales	Terrestrial Hot Spring Gp(THSCG)	NA	NA	ATGTGTCAGCGCCGCGGTAATACCAGCTCCCCGAGTGGTCGGGACGATTATTGGGCCTAAAGCATCCGTAGCCGGTCCCGTAAGTCCCCTGTTAAATCCAACGGCTCAACCGTTGGGCTGCAGGGGATACTGCGGGACTAGGGGGCGGGAGAGGCCGCCGGTATTCCCGGGGTAGGGGTAAAATCCTCTGATCCCGGGAGGACCACCAGTGGCGA
ASV_645	0	0	0	0	0	0	0	0	0	0	0	0	0	0	0	0	0	0	0	26	65	Bacteria	NA	NA	NA	NA	NA	NA	CGTTGTCCGGAATTATTGGGCGTAAAGGGCGCGCAGGCGGCTTGACAAGTCAGATGTGAAAGCCCCCGGCTTAACCGGGGAGGGTCATTTGAAACTGTCAGACTAGAGTGCAGCAGAGGAAGGTAGAATTCTGGGTGTAGTGGTGAAATGCGTAGATATCCAGAGGAATACCAGTGGCGAAGGCGGCCTTCTGGGCTGTAACTGACGCTGAGGCG
ASV_646	0	0	0	20	0	0	0	39	0	0	0	0	0	31	0	0	0	0	0	0	0	Bacteria	NA	NA	NA	NA	NA	NA	CGTTATCCGGAATTACTGGGCGTAAAGCGCGCGCAGGCGGATGTTTAAGTAGGGCGTGAAATCTCCCGGCCTAACTGGGAGGGGTCGCTCTAGACTGGGCGTCTTGAGGATGGCAGAGGTCGGTGGAATTCCTGGTGTAGTGGTGAAATGCGTAGAGATCAGGAGGAACACCGGTGGCGAAGGCGGCCGACTGGGGCATCGCTGACGCTGAGGCG
ASV_647	0	0	0	0	0	0	0	0	14	23	0	0	0	0	53	0	0	0	0	0	0	Bacteria	GAL15	NA	NA	NA	NA	NA	ATGTGTCAGCGCCGCGGTAAGACGTAGGGGGCGAGCGTTGTCCGGAATCACTGGGCGTAAAGCGCGTGTAGGCGGTTCGGTAAGTCCCGTGTGAAAGCCTACGGCTCAACTGTAGGAGGCCGCGGGATACTGCCGGGCTGGAGGACGGGAGAGGGAAGTGGAATTCCCGGTGTAGCGGTGAAATGCGTAGATATCGGGAGGAACGCCAGTGGCGA
ASV_648	0	0	0	0	0	0	0	0	14	3	0	0	0	0	0	51	14	8	0	0	0	Bacteria	Chloroflexi	Ktedonobacteria	Ktedonobacterales	Ktedonobacteraceae	1959-1	NA	CGTTGTCCGGATTTATTGGGCGTAAAGCGCACGCAGGCGGTCTGCCAAGTTCGGAGTGACAGTTTCCGGCTTAACCGGAAAAGGTCTTCGAAAACTGGTGGACTTGAGAACTTGAGGGGGAGACGGAATTCCGGGTGGAGCGGTGAAATGCGTAGAGATCCGGAGGAACACCGAAAGCGAAGGCAGTCTCCTGGCAAGTTTCTGACGCTCAGGTG
ASV_649	0	0	0	0	0	0	0	0	0	57	0	0	33	0	0	0	0	0	0	0	0	Bacteria	Chloroflexi	SHA-26	NA	NA	NA	NA	CGTTGTCCGGATTTACTGGGCGTAAAGAGCGCGTAGGCGGTCGCGTAGGTTGGGGGTGAAAGGTGCGGGCTTAACCCGCATAGGTCTTCCAAGACCGCGCGACTGGGAGGGCAGTAGAGGCAGGTGGAATTCCGGGTGTAGTGGTGAAATGCGTAGAGATCCGGAGGAACACCGGTGGCGAAGGCGGCCTGCTGGGCTGTCCCTGACGCTGAGGC
ASV_650	0	0	0	0	0	0	0	0	0	0	0	0	0	0	0	0	0	0	0	31	59	Bacteria	Dependentiae	Babeliae	Babeliales	UBA12409	NA	NA	CGTTATTCGGATTGATTGGGCGTAAAGGGTGTGTAGGCGGTATGTTAAGTCAATTGTTAAATCTCCCAGCTCAACTGGGAATCAGCAGTTGAAACTAGCGTGCTTGAGGGTGGAAGAGAGAAGTGGAATTCTCGGAGTAGCGGTAAAATGCGTAGATCTCGAGAGGAACACCGATGGCGAAGGCAGCTTCTTGGTCCATACCTGACGCTGAGGCA
ASV_651	0	0	29	4	0	0	56	0	0	0	0	0	0	0	0	0	0	0	0	0	0	Bacteria	Proteobacteria	Alphaproteobacteria	Micropepsales	Micropepsaceae	NA	NA	CGTTGTTCGGAATTACTGGGCGTAAAGCGCGCGCAGGCGGCCATTCAAGTCAGGGGTGAAAGCCCAGAGCTCAACTCTGGAACTGCCCTTGAAACTGTATGGCTTGAGTATGAGAGAGGTGAGTGGAATTCCCAGTGTAGAGGTGAAATTCGTAGATATTGGGAAGAACACCGGTGGCGAAGGCGGCTCACTGGCTCATTACTGACGCTCAGGCG
ASV_652	0	0	0	0	0	0	22	0	14	16	12	0	0	0	25	0	0	0	0	0	0	Bacteria	Proteobacteria	Gammaproteobacteria	Xanthomonadales	Rhodanobacteraceae	Mizugakiibacter	NA	CGTTAATCGGAATTACTGGGCGTAAAGCGTGCGTAGGTGGTTCGCTAAGTCCGTTGTGAAAGCCCCGAGCTCAACTTGGGAATGGCAGTGGATACTGGCGAGCTGGAGTGCGGTAGAGGAAGGTGGAATTCCCGGTGTAGCGGTGAAATGCGTAGAGATCGGGAGGAACACCAGTGGCGAAGGCGGCCTTCTGGACCAGCACTGACACTCAACAC
ASV_654	0	0	0	0	0	0	0	0	0	10	0	0	0	0	0	0	63	0	0	0	16	Bacteria	Acidobacteriota	Acidobacteriae	Bryobacterales	Bryobacteraceae	Bryobacter	NA	CGTTGTTCGGAGTTACTGGGCGTAAAGAGTGTGTAGGCTGTTCTCTAAGTTTGGTGTGAAATCTCCCGGCTCAACTGGGAGGGTGCGCCGAAAACTGGAGGGCTCGAGTATGGGAGAGGAAAGCGGAATTCCTGGTGTAGCGGTGAAATGCGTAGATATCAGGAGGAACACCTGCGGTGTAGACAGCTTTCTGGACCATCACTGACGCTGAGACA
ASV_655	0	0	0	0	0	0	0	0	0	0	0	0	0	0	0	0	0	0	0	0	89	Bacteria	Bacteroidota	Bacteroidia	Sphingobacteriales	Sphingobacteriaceae	Mucilaginibacter	NA	CGTTATCCGGATTTATTGGGTTTAAAGGGTGCGTAGGCGGCCAATTAAGTCAGGGGTGAAAGACGGTAGCTTAACTATCGCAGTGCCTTTGATACTGATTGGCTTGAATACACTAGAGGTAGGCGGAATGTGACAAGTAGCGGTGAAATGCATAGATATGTCACAGAACACCAATTGCGAAGGCAGCTTACTATGGTGTGATTGACGCTGAGGCA
ASV_656	88	0	0	0	0	0	0	0	0	0	0	0	0	0	0	0	0	0	0	0	0	Bacteria	Myxococcota	Polyangia	Polyangiales	Polyangiaceae	Pajaroellobacter	NA	GACAGAGGGTGCAAACGTTGTTCGGAATTACTGGGCGTAAAGCGAGTGTAGGCGGTCTGCTAAGTCGGGTGTGAAAGCCCCGGGCTCAACTCGGGAAGTGCACTCGAAACTGGCAGGCTAGAGTACTGGAGAGGTTGGTGGAATTCTCGGTGTAGAGGTGAAATTCGTAGATATCGAGAGGAACACCGGTGGCGAAGGCGGCCAACTGGACAGATACTGACGCTGAGACTCGAAAGCGTGGGGAGC
ASV_657	0	0	12	0	0	9	2	0	15	0	0	5	0	0	0	11	0	0	7	0	27	Bacteria	NA	NA	NA	NA	NA	NA	CGTTGTTCGGAATTATTGGGCGTAAAGCGTGCGTAGGCGGTTATCCAAGTCTGATGTTAAAGCTAGAGGCTCAACCTCTGTGATGCATTGGAAACTGGGTGACTGGAGTGCGGTAGGGGAAGGTGGAATTCCGAGTGTAGCGGTGAAATGCGTAGATATTCGGAAGAACACCGGTGGCGAAGGCGACCTTCTGGGCCGCTACTGACGCTGAGGCA
ASV_658	0	0	0	0	27	0	0	0	0	37	18	0	6	0	0	0	0	0	0	0	0	Bacteria	Myxococcota	Polyangia	Haliangiales	Haliangiaceae	Haliangium	NA	CGTTGCTCGGAATCATTGGGCGTAAAGCGCACGTAGGCGGCCTGTTAAGTCGGATGTGAAAGCCCTGGGCTCAACCCAGGAAGTGCATTCGAAACTGGCAGGCTTGAATATGGAAGAGGGTCGCGGAATTCCCGGTGTAGAGGTGAAATTCGTAGATATCGGGAGGAACACCAGTGGCGAAGGCGGCGACCTGGGCCAATATTGACGCTGAGGTG
ASV_659	0	0	0	0	0	0	0	0	0	0	3	0	85	0	0	0	0	0	0	0	0	Bacteria	Acidobacteriota	Vicinamibacteria	Vicinamibacterales	NA	NA	NA	GCGTTGTTCGGAATTACTGGGCGTAAAGGGCTTGTAGGTGGCCAACTAAGTCAGACGTGAAATCCCTCAGCTTAACTGGGGAACTGCGTCTGATACTGGATGGCTTGAGTTTGGGAGAGGGATGCGGAATTCCAGGTGTAGCGGTGAAATGCGTAGATATCTGGAGGAACACCGGTGGCGAAGGCGGCATCCTGGACCAACACTGACACTGAGGA
ASV_660	0	0	0	0	0	0	0	0	0	0	0	0	88	0	0	0	0	0	0	0	0	Bacteria	Chloroflexi	NA	NA	NA	NA	NA	TGTGCAGCGCCGCGGTAATACGTAGGGGGCAAGCGTTATCCGGATTTACTGGGCGTAAAGCGCGTTAAGGCGGCCGGCCAAGTTGAGGGTGAAATCGCAGGGCTCAACCCTGCAACTGCCTTCAATACTGGTCGGCTCGAGTGCGAGAGAGGAGAGTGGAATTCCCGGTGTAGTAGTGAAATGCGTAGATATCGGGAGGAACACCAGTGGCGAAG
ASV_661	0	87	0	0	0	0	0	0	0	0	0	0	0	0	0	0	0	0	0	0	0	Bacteria	Cyanobacteria	Cyanobacteriia	Cyanobacteriales	Nostocaceae	Nostoc PCC-73102	NA	TACGGAGGATGCAAGCGTTATCCGGAATGATTGGGCGTAAAGCGTCCGCAGGTGGCAATGTAAGTCTGCTGTTAAAGAGTCTAGCTCAACTAGATAAAAGCAGTGGAAACTACATAGCTAGAGTACGTTCGGGGCAGAGGGAATTCCTGGTGTAGCGGTGAAATGCGTAGAGATCAGGAAGAACACCGGTGGCGAAGGCGCTCTGCTAGGCCGTAACTGACACTGAGGGACGAAAGCTAGGGGAGC
ASV_662	0	87	0	0	0	0	0	0	0	0	0	0	0	0	0	0	0	0	0	0	0	Bacteria	NA	NA	NA	NA	NA	NA	GACGTAGGGGGCGAGCGTTGTTCGGAATACTGGGCGTAAAGCGTGCGTAGGCGGACTTATAAGTCAAGGTTGAAATATCCGGGCTCAACTCGGGGCACGGCCTTGATACTGCAAGTCTTGAGTCAAGTAGAGGGTAATGGAATTCCCGGTGTAGCGGTGAAATGCGTAGATATCGGGAGGAACACCAGTGGCGAAGGCGGTTACCTGGGCTTGTTCTGACGCTGAGGCACAAAAGCTGGGGGAGCA
ASV_663	0	0	0	0	11	0	0	0	16	0	0	0	4	0	4	43	2	7	0	0	0	Bacteria	Bdellovibrionota	Oligoflexia	0319-6G20	NA	NA	NA	CGTTGTTCGGAATTATTGGGCGTAAAGGGCAGGTAGGTGGTCTTGAAAGTCTACTGTGAAATCCCCGGGCTTAACTCGGGAAGTGCGGTAGATACTCCAAGACTAGAGTGCTGGAGGGGTGCGTGGAATTCCCGGTGTAGCGGTGAAATGCGTAGATATCGGGAGGAACACCAGAGGCGAAGGCGGCGCACTAGACAGTAACTGACACTCAACTG
ASV_664	0	0	0	0	0	0	72	0	0	15	0	0	0	0	0	0	0	0	0	0	0	Bacteria	Proteobacteria	Alphaproteobacteria	Acetobacterales	Acetobacteraceae	NA	NA	CGTTGCTCGGAATGACTGGGCGTAAAGGGCGCGTAGGCGGATGGTACAGTCAGATGTGAAATTCCTGGGCTCAACCTGGGGGCTGCATTTGATACGTGCTGTCTTGAGTTCGGAAGAGGGTCGTGGAATTCCCAGTGTAGAGGTGAAATTCGTAGATATTGGGAAGAACACCGGTGGCGAAGGCGGCGACCTGGTCCGATACTGACGCTGAGGCG
ASV_665	0	0	0	0	0	0	0	86	0	0	0	0	0	0	0	0	0	0	0	0	0	Bacteria	Acidobacteriota	Acidobacteriae	Acidobacteriales	Acidobacteriaceae (Subgroup 1)	NA	NA	CGTTGTTCGGAATTATTGGGCGTAAAGGGTGCGTAGGTGGTTCGGCAAGTCTTGTGTGAAATCTTCAGGCTCAACTTGAAGTCTGCACAAGAAACTGCCGGGCTTGAGTGTGGGAGAGGTGAGTGGAATTTCCGGTGTAGCGGTGAAATGCGTAGATATCGGAAGGAACACCTGTGGCGAAAGCGGCTCACTGGACCACTACTGACACTGAGGCA
ASV_666	0	0	0	0	0	0	0	0	0	0	0	0	8	0	0	0	0	78	0	0	0	Bacteria	Actinobacteriota	Acidimicrobiia	Microtrichales	Ilumatobacteraceae	NA	NA	CGTTGTCCGGATTTATTGGGCGTAAAGCGCTCGTAGGCGGTTCGGTAAGTCGGGTGTGAAACCCCTGGGCTCAACCCGGGGACGCCACCCGATACTGCTGTGACTCGAGTTCGGTAGGGGAGCGGGGAATTCCTGGTGTAGCGGTGAAATGCGCAGATATCAGGAGGAACACCGGTGGCGAAGGCGCCGCTCTGGGCCGATACTGACGCTGAGGA
ASV_667	0	0	0	0	16	0	0	0	0	0	14	0	8	0	0	0	12	19	0	16	0	Bacteria	Acidobacteriota	Acidobacteriae	Bryobacterales	Bryobacteraceae	Bryobacter	NA	CGTTGTTCGGAGTTACTGGGCGTAAAGAGTGCGTAGGCGGTCCTCTAAGTTTGGTGTGAAATCTCCCGGCTCAACTGGGAGGGTGCGCCGAAAACTGGAGGGCTTGAGTGTGGGAGAGGTAAGCGGAATTCCTGGTGTAGCGGTGAAATGCGTAGATATCAGGAGGAACACCTGCGGTGTAGACGGCTTACTGGACCACGACTGACGCTGAGGCA
ASV_668	0	0	0	0	29	0	0	0	10	11	35	0	0	0	0	0	0	0	0	0	0	Bacteria	Actinobacteriota	Acidimicrobiia	NA	NA	NA	NA	CGTTGTCCGGAATTATTGGGCGTAAAGAGCTCGTAGGCGGCTTGGCAAGTCGGGTGTGAAAACTCCAGGCTCAACCTGGAGACGCCACCCGATACTGCCATGGCTGGAGTCCGGTAGGGGATCACGGAATTCCTGGTGTAGCGGTGAAATGCGCAGATATCAGGAGGAACACCAGTGGCGAAGGCGGTGATCTGGGCCGGTACTGACGCTGAGGA
ASV_669	0	0	0	0	39	0	0	0	0	0	0	0	0	0	0	0	23	23	0	0	0	Bacteria	Actinobacteriota	Thermoleophilia	Solirubrobacterales	Solirubrobacteraceae	Conexibacter	NA	CGTTGTCCGGAATCATTGGGCGTAAAGAGCGTGTAGGCGGCTCGGTAAGTCTGCTGTGAAAGTCCAGGGCTCAACCCTGGAATGCCGGTGGAAACTGTCGGGCTAGAGTCCGGAAGAGGCGAGTGGAATTCCTGGTGTAGCGGTGAAATGCGCAGATATCAGGAGGAACACCAATGGCGAAGGCAGCTCGCTGGGACGGTACTGACGCTGAGACG
ASV_670	0	0	0	0	0	0	35	34	0	0	0	0	0	16	0	0	0	0	0	0	0	Bacteria	Proteobacteria	Gammaproteobacteria	Gammaproteobacteria Incertae Sedis	Unknown Family	Acidibacter	NA	CGTTAATCGGAATTACTGGGCGTAAAGCGTGCGTAGACGGTCATGTAAGTCGGATGTGAAAGCCCCGGGCTCAACCTGGGAATTGCATTCGAGACTGCAAGGCTTGGGTGCGGAAGAGGGAAGCGGAATTTCCGGTGTAGCGGTGAAATGCGTAGATATCGGAAGGAACACCAGTGGCGAAAGCGGCTTCCTGGTCCGACACCGACGTTCAGGCA
ASV_671	0	84	0	0	0	0	0	0	0	0	0	0	0	0	0	0	0	0	0	0	0	Bacteria	Proteobacteria	Alphaproteobacteria	Rhizobiales	Xanthobacteraceae	NA	NA	TACGAAGGGGGCTAGCGTTGCTCGGAATCACTGGGCGTAAAGCGCACGTAGGCGGATTGCTAAGTCAGGGGTGAAATCCTGGAGCTCAACTCCAGAACTGCCTTTGATACTGGCGATCTTGAGTCCGGGAGAGGTGAGTGGAACTGCGAGTGTAGAGGTGAAATTCGTAGATATTCGCAAGAACACCAGTGGCGAAGGCGGCTCACTGGCCCGGTACTGACGCTGAGGTGCGAAAGCGTGGGGAGC
ASV_672	0	0	48	0	0	36	0	0	0	0	0	0	0	0	0	0	0	0	0	0	0	Bacteria	Myxococcota	Polyangia	Haliangiales	Haliangiaceae	Haliangium	NA	CGTTGCTCGGAATCATTGGGCGTAAAGCGCACGTAGGCGGCTTGTTAAGTCGGGTGTGAAAGCCCTGGGCTCAACCCGGGAAGTGCACTCGAAACTGGCGAGCTTGAATATGGAAGAGGGTCGCGGAATTCCCGGTGTAGAGGTGAAATTCGTAGATATCGGGAGGAACACCAGTGGCGAAGGCGGCGACCTGGGCCAATATTGACGCTGAGGTG
ASV_673	0	0	0	0	0	0	0	0	69	0	0	0	0	0	0	5	2	0	0	0	8	Bacteria	Dependentiae	Babeliae	Babeliales	Babeliaceae	NA	NA	CGTTATTCGGAATCATTGGGCGTAAAGGGTGTGTAGGCGGCATGATAAGTCAATTGTTAAAGACCCCGGCCTAACTGGGGAAAAGCAGTAGATACTATCTGTGCTAGAGGATGGAAGAGAGAAGTGGAATTCTTGGAGTAGCGGTAAAATGCGTAGATCTCAAGGGGAACACCGATGGCGAAGGCAGCTTCTTGGTCCATTCCTGACGCTAATGC
ASV_674	0	0	0	0	0	0	0	0	0	0	0	0	0	0	0	0	0	0	0	0	84	Bacteria	Acidobacteriota	Acidobacteriae	Acidobacteriales	NA	NA	NA	CGTTGTTCGGAATTATTGGGCGTAAAGGGCGCGTAGGCGGTGCGGTAAGTCTGTGGTGAAATCTTCGGGCTCAACTCGAAAATTGCCGCGGAAACTGCCGTGCTTGAGTGTGGGAGAGGTGCGTGGAATTCCCGGTGTAGCGGTGAAATGCGTAGATATCGGGAGGAACACCTGTGGCGAAAGCGGCGCACTGGACCACAACTGACGCTGATGCG
ASV_675	0	0	0	0	0	0	0	78	0	0	0	0	0	0	0	0	0	0	5	0	0	Bacteria	Chloroflexi	Chloroflexia	Thermomicrobiales	Thermomicrobiaceae	NA	NA	CGTTGTCCGGAGTTACTGGGCGTAAAGGGCGCGTAGGCGGTTGCCCGCGTCGCACGTGAAAGCCCCCGGCTCAACCGGGGAGGGTCGTGCGAGACGGGGCAACTGGAGGCAGGGAGAGGCTGGTGGAATTCCCGGTGTAGTGGTGAAATGCGTAGAGATCGGGAGGAACACCTGAGGCGAAGGCGCCAGCTGGCCCTGTCCTGACGCTGAGGCGC
ASV_676	0	0	0	0	0	0	0	0	23	0	0	0	0	0	0	0	18	42	0	0	0	Bacteria	Acidobacteriota	Acidobacteriae	Subgroup 2	NA	NA	NA	ATGTGTCAGCGCCGCGGTAATACGTAGGGGGCCAGCGTTGCTCGGAATTACTGGGCGTAAAGGGTTCGTAGGCGGTGCGGCAAGTCGGGGGTGAAATCTTTGGGCTTAACCCAGAGGCTGCCTTCGAAACTGCCGTGCTCGAGTGCGGGAGAGGCGAGTGGAATTGCAGGTGTAGCGGTGAAATGCGTAGATATCTGCAGGAACACCCGGGGCGA
ASV_677	0	0	0	0	0	0	0	0	0	0	0	0	0	0	0	0	0	83	0	0	0	Bacteria	Proteobacteria	NA	NA	NA	NA	NA	GCGTTATTCGTCATGATTGGGCGTAAAGCGCATGTAGGTGGTTTTGATCCGTCGCGCATGCAAATCCCTAGGCTTACCTTAGGTATGATGTGCTGGTGGTAAAAACTAGAGTAAGTGAAAGGAGAGTAGAATTCCTGGTGGAGAGGTGGAATTTTCAGATACTAGGAGGAATTTCGAAAGCGAAGGCAGCTCTCTAGCACTTGACTGACGCTGAG
ASV_679	0	0	0	0	0	0	0	59	0	0	0	0	0	23	0	0	0	0	0	0	0	Bacteria	Armatimonadota	Armatimonadia	Armatimonadales	NA	NA	NA	CGTTGTCCGAAGTTACTGGGCGTAAAGAGCGCGTAGGCGGGTCTTTAAGTGAGAGGTGAAATGTCCAGGGCTCAACCCGGACACTGCCTTTCATACTGGGGACCTTGAGTGTGGGAGAGGCGAGTGGAATGGTCGGTGTAGCGGTGAAATGCGTAGATATCGATCGGAACACCCATGGCGAAGGCAGCTCGCTGGCCTATAACTGACGCTGAGGC
ASV_680	0	0	0	0	0	0	0	0	0	0	0	0	0	0	0	22	27	33	0	0	0	Bacteria	Chloroflexi	Ktedonobacteria	Ktedonobacterales	Ktedonobacteraceae	1921-3	NA	CGTTGTCCGGAATACTGGGCGTAAAGCGCACGCAGGTGGTGATGTTAGTGGAGGGTTACAGCTCCTGGCTTAACCAGGAGAGTGCCTGTCCAGACTGCATCGCTTGAGAGCGAGAGAGGGACATGGAATTCCAGGTGGAGCGGTGAAATGCGTAGAGATCTGGAGGAACACCAAAGGCGAAGGCAGTGTCCTGGCTCGTTTCTGACACTCCGGTG
ASV_681	0	0	0	0	0	0	0	0	0	0	0	0	82	0	0	0	0	0	0	0	0	Bacteria	Acidobacteriota	Acidobacteriae	Acidobacteriales	NA	NA	NA	CGTTGTTCGGAATTATTGGGCGTAAAGGGCGCGTAGGCGGCGCGACAAGTCACTTGTGAAATCTCCGGGCTTAACCCGGAGCCTGCAGGCGAAACTGTCGTGCTGGAGTATGGGAGAGGTGCGTGGAATTCCCGGTGTAGCGGTGAAATGCGTAGATATCGGGAGGAACACCTGTGGCGAAAGCGGCGCACTGGACCATAACTGACGCTGAGGCG
ASV_682	0	0	0	0	0	0	0	0	0	0	0	0	0	0	0	81	0	0	0	0	0	Bacteria	Cyanobacteria	Cyanobacteriia	Cyanobacteriales	Nostocaceae	NA	NA	ATGTGCAGCGCCGCGGTAATACGGAGGATGCAAGCGTTATCCGGAATGATTGGGCGTAAAGCGTCCGCAGGTGGCAGTGAAAGTCTGCTGTTAAAGAGTCTGGCTCAACCAGATAAAGGCAGTGGAAACTACACAGCTAGAGTGCGTTCGGGGTAGAGGGAATTCCTGGTGGAGCGGTGAAATGCGTAGAGATCAGGAAGAACACCGGTGGCGAA
ASV_683	0	0	0	33	0	0	0	0	0	0	0	0	0	47	0	0	0	0	0	0	0	Bacteria	Proteobacteria	Gammaproteobacteria	Xanthomonadales	Rhodanobacteraceae	Mizugakiibacter	NA	CGTTAATCGGAATTACTGGGCGTAAAGCGTGCGTAGGTGGTTCGTTAAGTCCGTTGTGAAAGCCCCGAGCTCAACTTGGGAATTGCAGTGGATACTGATGAGCTGGAGTGCGGTAGAGGAAGGTGGAATTCCCGGTGTAGCGGTGAAATGCGTAGAGATCGGGAGGAACACCTGAGGCGAAGGCGGCCAGCTGGCCCTGTCCTGACGCTGAGGCG
ASV_684	0	0	79	0	0	0	0	0	0	0	0	0	0	0	0	0	0	0	0	0	0	Bacteria	Deinococcota	Deinococci	Thermales	Thermaceae	Meiothermus	NA	TGTGCAGCGCCGCGGTAATACGGAGGGTGCGAGCGTTACCCGGATTTACTGGGTGTAAAGGGCGTGTAGGCGGATACTCAAGTCCGGTGCTAAAGACTGGGGCTCAACCCCAGGAGTGCGCTGGATACTGGGTGTCTAGACGGTCGGAGAGGGCAGCGGAATTCTCGGAGTAGCGGTGAAATGCGCAGATACCGAGAGGAACGCCGATAGCGAAA
ASV_685	0	0	0	0	53	0	0	0	0	0	0	0	17	0	0	0	0	0	0	9	0	Bacteria	Proteobacteria	Alphaproteobacteria	Sphingomonadales	Sphingomonadaceae	Parablastomonas	NA	CGTTGTTCGGAATTACTGGGCGTAAAGCGTACGTAGGCGGTTATTCAAGTCAGAGGTGAAAGCCCGGGGCTCAACCCCGGAACGGCCTTTGAAACTAGATAGCTAGAGTCTTGGAGAGGTTAGTGGAATTCCGAGTGTAGAGGTGAAATTCGTAGATATTCGGAAGAACACCAGTGGCGAAGGCGACTAACTGGACAAGTACTGACGCTGAGGTA
ASV_686	0	0	0	0	0	0	0	0	14	11	0	0	0	0	0	15	17	22	0	0	0	Bacteria	Chloroflexi	Anaerolineae	SBR1031	A4b	NA	NA	ATGTGTCAGCGCCGCGGTAAAACGTAGGAGGCGAGCGTTATCCGGAATTACTGGGCGTAAAGGGTGTGCAGGCGGGTCGTTAAGTGGTGCATGAAAGCCCTACGCTCAACGTAGGGAGGCTGTGCCAGACTGGCGGTCTGGAGTGCGCGAGAGGGCTGTGGAATTCCGGGTGTAGTGGTGAAATGCGTAGAGATCCGGAGGAACACCAGAGGCGA
ASV_688	0	78	0	0	0	0	0	0	0	0	0	0	0	0	0	0	0	0	0	0	0	Bacteria	NA	NA	NA	NA	NA	NA	TACGTAGGGGGCGAGCGTTGTCCGGAATGACTGGGCGTAAAGGGCGCGTAGGTGGCGCATCAAGACCAGCGTGAAATCGCCGCGCTTACCGTGGCGGGGTCGTTGGTGACTGGTGGGCTAGGGTTCGGCAGAGGTCGGTAGAATTCCCGGTGGAGCGGTGAAATGCGTAGAGATCGGGAGGAATACCAGTGGCGAAGGCGGCCGACTGGGCCGGGACCGACACTGAGGCGCGAAAGCGTGGGGAGC
ASV_689	0	0	22	0	0	48	3	0	0	0	0	0	0	5	0	0	0	0	0	0	0	Bacteria	Planctomycetota	Phycisphaerae	Phycisphaerales	Phycisphaeraceae	NA	NA	CGTTAATCGGAGTCACTGGGCTTAAAGGGTGCGTAGGCGGGCTCGCAAGTGCTTTGTGAAATCCCATGGCTTAACCATGGAATTGCTTGGCATACTGCGGGCCTTGAGGTCGGTAGAGGCTGCTGGAACTCTAGGTGGAGCGGTGAAATGCGTAGATATCTAGAGGAACGCCGATGGTGAAGACAGGCAGCTGGGCCGATTCTGACGCTGAGGCA
ASV_690	0	0	0	0	0	34	44	0	0	0	0	0	0	0	0	0	0	0	0	0	0	Bacteria	Proteobacteria	Gammaproteobacteria	Xanthomonadales	Rhodanobacteraceae	Dyella	NA	CGTTAATCGGAATTACTGGGCGTAAAGCGTGCGTAGGCGGTTTCTTAAGTCTGCTGTGAAATCCCCGGGCTCAACCTGGGAATGGCAGTGGATACTGGGAAGCTAGAGTGTGTCAGAGGATGGTGGAATTCCCGGTGTAGCGGTGAAATGCGTAGAGATCGGGAGGAACATCAGTGGCGAAGGCGGCCATCTGGGACAACACTGACGCTGAGGCA
ASV_691	0	0	0	0	0	0	0	0	0	0	0	0	0	0	54	0	24	0	0	0	0	Bacteria	Chloroflexi	Anaerolineae	SBR1031	NA	NA	NA	CGTTATCCGGATTTACTGGGCTTAAAGGGTGTGCAGGCGGGTTGGTAAGTGGTGCATGAAAGCCGCGCGCTCAACGTGCGGAGGCTGTGCCAGACTGCCAGTCTAGAGGGTGCTAGAGGAACGTGGAATTCCGGGTGTAGTGGTGAAATGCGTAGAGATCCGGAGGAACACCAGAGGCGAAGGCGACGTCCTGGGGCATACCTGACGCTCAGACA
ASV_692	0	0	0	0	21	0	0	0	5	0	9	0	15	0	0	0	5	22	0	0	0	Bacteria	Planctomycetota	Planctomycetes	Gemmatales	Gemmataceae	NA	NA	CGTTGTTCGGAATCACTGGGCTTAAAGGGTGCGTAGGCGGGCCGTCAAGTCAGGGGTGAAAGCCTCCAGCTCAACTGGAGAAGTGCCTTTGATACTGGCGGCCTCGAGGGAGGTAGGGGCGTGCGGAACTTCCGGTGGAGCGGTGAAATGCGTAGATATCGGAAGGAACACCAGTGGCGAAAGCGGCGCGCTGGACCTCTTCTGACGCTGAGGCA
ASV_693	0	0	0	0	18	0	0	0	0	0	18	0	0	0	0	0	10	6	0	25	0	Bacteria	Myxococcota	Polyangia	Haliangiales	Haliangiaceae	Haliangium	NA	CGTTGCTCGGAATTATTGGGCGTAAAGCGCACGTAGGCGGCATGGCAAGTCCCATGTGAAATCCCACGGCTTAACCGTGGAAGTGCATGGGAAACTGCTGTGCTTGAGTACTTAAGAGGATCGCGGAATTCCCGGTGTAGAGGTGAAATTCGTAGATATCGGGAGGAACACCAGTGGCGAAGGCGGCGATCTGGGAAGATACTGACGCTGAGGTG
ASV_694	0	0	0	0	0	19	0	0	9	0	0	0	0	0	4	37	0	8	0	0	0	Bacteria	NA	NA	NA	NA	NA	NA	CGTTGTTCGGAATCATTGGGCGTAAAGCGCGTGTAGGCGGTTAGTTAAGTCGGGTGTGAAATCCCTGGGCTCAACCGAGGAAGTGCATCCGAAACTAATTAGCTAGAGAGTGGTAGAGGAAGGTGGAATTCCGTGTGTAGAGGTGAAATTCGTAGATATACGGAGGAATACCGGTGGCGAAGGCGGCCTTCTGGACCATTTCTGACGCTGAGACG
ASV_695	0	76	0	0	0	0	0	0	0	0	0	0	0	0	0	0	0	0	0	0	0	Bacteria	Myxococcota	Myxococcia	Myxococcales	Anaeromyxobacteraceae	Anaeromyxobacter	NA	TACAGAGGGTGCAAGCGTTGTTCGGAATTATTGGGCGTAAAGCGCATGTAGGCGGTCTGTTAAGTCGCGTGTGAAATCCCTAGGCTTAACCTAGGAAGTGCGCGCGAAACTGGCGGACTTGAGTGCTGGAGAGGGTCGCGGAATTCCCGGTGTAGAGGTGAAATTCGTAGATATCGGGAGGAACACCAGTGGCGAAGGCGGCGACCTGGACAGACACTGACGCTGAGACGCGAAAGCGTGGGGAGC
ASV_696	0	0	0	0	44	0	0	0	12	0	20	0	0	0	0	0	0	0	0	0	0	Bacteria	Actinobacteriota	Acidimicrobiia	IMCC26256	NA	NA	NA	CGTTGTCCGGATTTATTGGGCGTAAAGAGCTCGTAGGCGGTTCGGTAAGTCGGATGTGAAATCTCCACGCTCAACGTGGAGGGGCCATTCGATACTGCCGTGACTAGAGTCCGGTAGGGGAGTGTGGAATTCCCGGTGTAGCGGTGAAATGCGCAGAGATCGGGAGGAACACCCGTAGCGAAGGCGGCACTCTGGGCTGTGACTGACGCTGAGGA
ASV_697	0	0	0	0	0	0	0	0	0	45	0	0	7	0	0	0	24	0	0	0	0	Bacteria	WPS-2	NA	NA	NA	NA	NA	CGTTATTCGGAATTATTGGGCGTAAAGCGCTCGTAGGCGGGGTGGAAAGTCCGTGAAGAAAGACCTGGGCTCAACTCAGGGAACGGCACGGATACTTCCACTCTTGAGGCATTCAGAGGATGATGGAATTCCCGGTGTAGCGGTGAAATGCGTAGATATCGGGAGGAACACCAGTGGCGAAGGCGATCATCTGGGGATGTTCTGACGCTGAGGAG
ASV_698	0	0	0	0	0	0	0	0	0	0	0	76	0	0	0	0	0	0	0	0	0	Bacteria	GAL15	NA	NA	NA	NA	NA	GATGTGTCAGCGCCGCGGTAAGACGTAGGGGGCGAGCGTTGTCCGGAATCACTGGGCGTAAAGCGCGTGTAGGCGGTTCGGTAAGTCCCGTGTGAAAGCCTACGGCTCAACTGTAGGAGGCCGCGGGATACTGCCGGGCTGGAGGACGGGAGAGGGAAGTGGAATTCCCGGTGTAGCGGTGAAATGCGTAGATATCGGGAGGAACGCCAGTGGCG
ASV_699	0	0	0	0	0	0	0	0	0	0	0	0	0	0	0	0	0	0	0	9	67	Bacteria	Chloroflexi	Anaerolineae	SBR1031	NA	NA	NA	CGTTATCCGGATTTACTGGGCGTAAAGGGTGTGCAGGCGGGTCGTTAAGTCGTGCATGAAAGCCACAGGCTCAACCTGTGGAGGATGTGCGAGACTGGCGGTCTAGAGTGTGTGAGAGGGATGTGGAATTCCGGGTGTAGTGGTGAAATGCGTAGAGATCCGGAGGAACACCAGAGGCGAAGGCGGCATCCTGGCACACAACTGACGCTGAGACA
ASV_700	0	75	0	0	0	0	0	0	0	0	0	0	0	0	0	0	0	0	0	0	0	Bacteria	Actinobacteriota	Thermoleophilia	Gaiellales	NA	NA	NA	TACGTAGGGGGCTAGCGTTGTCCGGATTTATTGGGCGTAAAGAGCGTGTAGGCGGCCAGGTAGGTCCGTTGTGAAAACTCGAGGCTCAACCTCGAGACGTCGGCGGAAACCCTCTGGCTAGAGTCCGGAAGAGGAGAGTGGAATTCCTGGTGTAGCGGTGAAATGCGCAGATATCAGGAAGAACACCCGTGGCGAAGGCGGCTCTCTGGGACGGTACTGACGCTGAGACGCGAAAGCGTGGGGAGC
ASV_701	0	0	0	0	34	0	0	0	0	0	0	0	41	0	0	0	0	0	0	0	0	Bacteria	Chloroflexi	SHA-26	NA	NA	NA	NA	CGTTGTCCGGATTTACTGGGCGTAAAGAGCGCGTAGGCGGCGCGTTAGGTTGGGGGTGAAAGGTTCGGGCTTAACTCGAACAGGTCTTCCAAAACCGGCGCGCTGTGAGGGCAGTAGAGGAAGGTGGAATTCCGGGTGTAGTGGTGAAATGCGTAGAGATCCGGAGGAACACCGGTGGCGAAGGCGGCCTTCTGGGCTGACCCTGACGCTGAGGC
ASV_702	0	0	0	0	33	0	0	0	0	0	0	0	29	0	0	0	0	13	0	0	0	Bacteria	Chloroflexi	P2-11E	NA	NA	NA	NA	CGTTGTCCGGATTTACTGGGCGTAAAGCGCGCGCAGGCGGTTCCGAAAGTCCATGGTGAAAGCTCCCGGCCCAACTGGGAGAGGCCCGTGGAAACTCCGGAACTTGAAGGCGGGAGAGGCAAATGGAATTTCCGGTGTAGCGGTAAAATGCGTAGATACCGGAAGGAACACCAGTGGCGAAGGCGATTTGCTGGCCCGTTCTTGACGCTCAGGCG
ASV_703	0	0	0	0	16	0	0	0	0	17	14	0	6	0	0	4	8	10	0	0	0	Bacteria	Planctomycetota	Planctomycetes	Gemmatales	Gemmataceae	NA	NA	CGTTATTCGGAATCACTGGGCTTAAAGGGCGCGTAGGCGGGCGATCAAGTCAGGGGTGAAAGCCTCCAGCTCAACTGGAGAAGTGCCTCTGATACTGGCCGTCTCGAGGGGGATAGGGGCGTGCGGAACTTCCGGTGGAGCGGTGAAATGCGTAGATATCGGAAGGAACACCGATGGCGAAAGCAGCGCGCTGGATCCCTTCTGACGCTGAGGCG
ASV_704	0	0	0	0	62	0	0	0	0	0	0	0	13	0	0	0	0	0	0	0	0	Bacteria	Myxococcota	Polyangia	Polyangiales	Polyangiaceae	Pajaroellobacter	NA	CGTTGTTCGGAATACTGGGCGTAAAGCGTGTGTAGGCGGCTACGTAAGTCGGATGTGAAAGCCCTGGGCTCAACCCAGGAAGTGCACTCGATACTGCGTAGCTTGAGTCTCGGAGAGGTTGGTGGAATTCTCGGTGTAGAGGTGAAATTCGTAGATATCGAGAGGAACACCGGTGGCGAAGGCGGCCAACTGGACGAAGACTGACGCTGAGACAC
ASV_705	0	0	0	0	0	8	58	0	0	0	0	0	0	0	0	0	0	0	0	9	0	Bacteria	Proteobacteria	Gammaproteobacteria	Burkholderiales	Oxalobacteraceae	Massilia	NA	CGTTAATCGGAATTACTGGGCGTAAAGCGTGCGCAGGCGGTTTTGTAAGTTTGTCGTGAAATCCCCGGGCTCAACCTGGGAATGGCGATGAAGACTGCAAGGCTAGAATCTGGCAGAGGGGGGTAGAATTCCACGTGTGAGCAGTGAAATGCGTAGAGATGTGGAGGAACACCGATGGCGAAGGCAGCCCCCTGGGTCAAGATTGACGCTCATGC
ASV_707	0	0	0	0	0	0	0	58	0	0	0	0	0	17	0	0	0	0	0	0	0	Bacteria	Actinobacteriota	Actinobacteria	Frankiales	Sporichthyaceae	Longivirga	NA	CATTGTCCGGATTTATTGGGCGTAAAGAGCTCGTAGGCGTCCGCCACGTCGGATGTGAAAACTTGGGGCTCAACCCCGAGCCTGCATCCGATACGGGCAGACTAGAGTGTTGCAGGGGAGACTGGAATTCCTGGTGTAGCGGTGAAATGCGCAGATATCAGGAGGAACACCGGTGGCGAAGGCGGGTCTCTGGGCAACTACTGACGCTGAGGAGC
ASV_708	0	0	0	0	0	0	0	49	0	0	0	0	0	26	0	0	0	0	0	0	0	Bacteria	Chloroflexi	SHA-26	NA	NA	NA	NA	CGTTGTCCGGATTTACTGGGCGTAAAGAGCGCGTAGGCGGCCGTGTTTGTCGGGTGTGAAAGGCGTGGGCTTAACCCACGGAAGTCACCCGAAACGGCGCGGCTTCGAGGGCAGTAGAGGAAGGTGGAATTCCGGGTGTAGTGGTGAAATGCGTAGAGATCCGGAGGAACACCGGTGGCGAAGGCGGCCTTCTGGGCTGGCCCTGACGCTGAGGC
ASV_709	0	0	0	0	0	0	0	0	0	0	0	0	7	0	0	0	14	54	0	0	0	Bacteria	Acidobacteriota	Acidobacteriae	Bryobacterales	Bryobacteraceae	Bryobacter	NA	CGTTGTTCGGAATTACTGGGCGTAAAGAGTGTGTAGGCGGTGTTCCCAGTCTGTTGTGAAATCTCCCGGCTTAACTGGGAGGGTGCAGCGGAAACTAGAATGCTAGAGGGTGGGAGAGGTAAGCGGAATTCCTGGTGTAGCGGTGAAATGCGTAGATATCAGGAGGAACACCTGTGGTGTAGACAGCTTACTGGACCACTTCTGACGCTGAGACA
ASV_710	74	0	0	0	0	0	0	0	0	0	0	0	0	0	0	0	0	0	0	0	0	Bacteria	Chloroflexi	OLB14	NA	NA	NA	NA	TACGTAGGTGTCGAGCGTTGTCCGGATTTACTGGGCGTAAAGCGCCCGCAGGCGGCCAGGCAAGTCCAGGGTGAAATCTCCCGGCTCAACCGGGAGGGGTCCTTGGAAACTGCCTGGCTTGAGGCAGGGAGAGGGATGTGGAATTCCCGGTGTAGTGGTGAAATACGTAGATATCGGGAGGAACACCAGTGGCGAAGGCGGCATCCTGGCCCTGTCCTGACGCTCAGGGGCGAAAGCGTGGGGAGC
ASV_711	28	46	0	0	0	0	0	0	0	0	0	0	0	0	0	0	0	0	0	0	0	Bacteria	Chloroflexi	SHA-26	NA	NA	NA	NA	GACGTAGGGGGCGAGCGTTGTCCGGATTTACTGGGCGTAAAGAGCGCGTAGGCGGCTCGGCAGGTTGGGTGTGAAAGGCGCGGGCTTAACCCGCGGAGGTCATCCAAGACGGTCGGGCTGAGAGGGCAGTAGAGGAAGGTGGAATTCCGGGTGGAGTGGTGAAATGCGTAGAGATCCGGAGGAACACCGGTGGCGAAGGCGGCCTTCTGGGCTGGCCCTGACGCTGAGGCGCGAAAGCGTGGGGAG
ASV_712	24	50	0	0	0	0	0	0	0	0	0	0	0	0	0	0	0	0	0	0	0	Bacteria	Myxococcota	Polyangia	Polyangiales	Polyangiaceae	Pajaroellobacter	NA	GACAGAGGGTGCGAACGTTGCTCGGAATACTGGGCGTAAAGCGTGTGTAGGCGGCCACGCAAGTCGGATGTGAAAGCCCTGGGCTCAACCCAGGAAGTGCACCCGATACTGCATGGCTCGAGTACCGGAGAGGTTGGTGGAATTCTCGGTGTAGAGGTGAAATTCGTAGATATCGAGAGGAACACCGGTGGCGAAGGCGGCCAACTGGACGAGTACTGACGCTGAGACACGAAAGCGTGGGGAGCA
ASV_713	0	74	0	0	0	0	0	0	0	0	0	0	0	0	0	0	0	0	0	0	0	Bacteria	WPS-2	NA	NA	NA	NA	NA	TACGTAGGGGGCGAGCGTTGTTCGGAATTATTGGGCGTAAAGCGTGCGTAGGCGGATCTGTAAGTCGGGGTTGAAATATCCGGGCTCAACTCGGGGCACGGCCTCGATACTGCAGATCTCGAGTCATGAAGAGGGTGATGGAATTCCCGGTGTAGCGGTGAAATGCGTAGATATCGGGAGGAACACCAGTGGCGAAGGCGGTCACCTGGTCATGCACTGACGCTGATGCACGAAAGCTGGGGGAGC
ASV_714	0	0	0	22	0	8	0	0	0	0	0	44	0	0	0	0	0	0	0	0	0	Bacteria	Verrucomicrobiota	Chlamydiae	Chlamydiales	Parachlamydiaceae	Candidatus Protochlamydia	NA	CATTAATCGGATTTATTGGGCGTAAAGGGCGCGTAGGCGGGGATAATAGTCAGATGTGAAATCCTGGGGCTCAACCTCAGAACTGCATTTGAAACTGTATCTCTAGAGGGTAGGAGGAGAAAACGGAATTCCACAAGTAGCGGTGAAATGCGTAGATATGTGGAAGAACACCGGTGGCGAAGGCGGTTTTCTATCTTATTCCTGACGCTGAGGCG
ASV_715	0	0	0	0	13	0	0	0	7	0	0	0	0	0	0	0	21	33	0	0	0	Bacteria	Actinobacteriota	Acidimicrobiia	Microtrichales	Ilumatobacteraceae	NA	NA	CGTTGTCCGGATTTATTGGGCGTAAAGCGCTCGTAGGCGGTTCGGTAAGTCGGGTGTGAAACCTCTGGGCTCAACTCAGAGACGCCACCCGATACTGCTGTGACTTGAGTTCGGTAGGGGAGCGGGGAATTCCTGGTGTAGCGGTGAAATGCGCAGATATCAGGAGGAACACCGGTGGCGAAGGCGCCGCTCTGGGCCGATACTGACGCTGAGGA
ASV_716	0	0	0	0	0	0	0	30	0	0	0	0	0	44	0	0	0	0	0	0	0	Bacteria	Firmicutes	Sulfobacillia	Sulfobacillales	Sulfobacillaceae	NA	NA	CGTTGTCCGGAATTACTGGGCGTAAAGGGCGTCTAGGCGGCTTCGTACGTCACGTGTGAAAGTCCCGGGCTCAACCTGGGGAGGTCACGTGAAACGGCGGGGCTTGAGGGCCGGAGAGGGAAGCGGAATTGCCGGTGTAGCGGTGAAATGCGTAGAGATCGGCAGGAACACCAGTGGCGAAGGCGGCTTCCTGGACGGTACCTGACGCTGAAGCG
ASV_717	0	0	0	0	0	0	0	0	0	28	0	0	0	0	0	0	0	0	46	0	0	Bacteria	Firmicutes	Bacilli	Lactobacillales	Streptococcaceae	Streptococcus	NA	CGTTGTCCGGATTTATTGGGCGTAAAGCGAGCGCAGGCGGTTAGATAAGTCTGAAGTTAAAGGCTGTGGCTTAACCATAGTACGCTTTGGAAACTGTTTAACTTGAGTGCAGAAGGGGAGAGTGGAATTCCATGTGTAGCGGTGAAATGCGTAGATATATGGAGGAACACCGGTGGCGAAAGCGGCTCTCTGGTCTGTAACTGACGCTGAGGCTC
ASV_718	0	0	0	0	0	0	0	0	0	0	0	0	64	0	0	0	0	10	0	0	0	Bacteria	Chloroflexi	Chloroflexia	Elev-1554	NA	NA	NA	CGTTGTCCGGAATTACTGGGCGTAAAGAGCGCGTAGGCGGCGCGGTACATCCGCGGTAAAAGCCCCTGGCTCAACTAGGGGAAGCCCGCGGCGATGGCCGTGCTAGAGGGTGGTAGAGGCAGGCGGAAGTCCCGAAGTAGTGGTGAAATGCGTAGAGATCGGGAGGAACACCAGTGGCGAAGGCGGCCTGCTGGGCCACGACTGACGCTGAGGCG
ASV_719	0	0	0	0	0	0	0	0	0	0	0	0	74	0	0	0	0	0	0	0	0	Bacteria	Proteobacteria	Alphaproteobacteria	Rhizobiales	Xanthobacteraceae	NA	NA	CGTTGCTCGGAATCACTGGGCGTAAAGCGCACGTAGGCGGCTTTTTAAGTCAGGGGTGAAATCCTGGAGCTCAACTCCAGAACTGCCTTTGATACTGAGAAGCTCGAGTCCGGGAGAGGTGAGTGGAACTGCGAGTGTAGAGGTGAAATTCGTAGATATTCGCAAGAACACCAGTGGCGAAGGCGGCTCACTGGCCCGGTACTGACGCTGAGGTG
ASV_720	0	0	0	0	53	0	0	0	0	0	0	0	20	0	0	0	0	0	0	0	0	Bacteria	Acidobacteriota	Acidobacteriae	Bryobacterales	Bryobacteraceae	Bryobacter	NA	CGTTGTTCGGAGTTACTGGGCGTAAAGAGTGCGTAGGCGGTGACCTAAGTTCGTTGTGAAATCTCCCGGCTTAACTGGGAGGGTGCGGCGAAAACTGGGTTGCTAGAGTGTGGGAAAGGCAAGCGGAATTCCTGGTGTAGCGGTGAAATGCGTAGATATCAGGAGGAACACCGGCGGTGTAGACGGCTTGCTAGACCATAACTGACGCTGAGGCA
ASV_721	0	0	0	0	0	0	0	13	0	0	0	0	0	60	0	0	0	0	0	0	0	Bacteria	Planctomycetota	Planctomycetes	Isosphaerales	Isosphaeraceae	Aquisphaera	NA	CGTTATTCGGAATCACTGGGCTTAAAGCGCGTGTAGGCGGATGGGGACGTCGGTTGTTGAAAGCCCCCGGCTCAACCGGGGAACTGGCACCGAAACGCCCCGTCTCGAGGGACGTAGGGGGACCTGGAACTTCCGGTGGAGCGGTGAAATGCGTTGAGATCGGAAGGAACGCCCGTGGCGAAAGCGAGGTCCTGGACGTCTACTGACGCTGAGAC
ASV_722	0	0	0	0	0	0	0	0	22	0	0	0	0	0	16	18	8	0	0	9	0	Bacteria	Armatimonadota	Armatimonadia	Armatimonadales	NA	NA	NA	CGTTGTCCGAAGTACTGGGCGTAAAGCGCGCGTAGGCGGGTTCTTAAGTGAGAGGTGAAAGGTTCAGGGCTCAACCCGGACACTGCCTTTCATACTGGGAGCCTTGAGTGCAGGAGAGGCGAGTGGAATGGTCGGTGTAGCGGTGAAATGCGTAGATATCGATCGGAACACCCATGGCGAAGGCAGCTCGCTGGCCTGTAACTGACGCTGAGGCG
ASV_723	0	72	0	0	0	0	0	0	0	0	0	0	0	0	0	0	0	0	0	0	0	Bacteria	Proteobacteria	Alphaproteobacteria	Rhizobiales	Xanthobacteraceae	NA	NA	TACGAAGGGGGCTAGCGTTGCTCGGAATCACTGGGCGTAAAGCGCACGTAGGCGGCTTTTTAAGTCAGGGGTGAAATCCTGGAGCTCAACTCCAGAACTGCCTTTGATACTGAGAAGCTTGAGTCCGGGAGAGGTGAGTGGAACTGCGAGTGTAGAGGTGAAATTCGTAGATATTCGCAAGAACACCAGTGGCGAAGGCGGCTCACTGGCCCGGTACTGACGCTGAGGTGCGAAAGCGTGGGGAGC
ASV_724	0	0	48	0	0	10	0	0	0	0	0	0	0	14	0	0	0	0	0	0	0	Bacteria	Proteobacteria	Alphaproteobacteria	Micropepsales	Micropepsaceae	NA	NA	CGTTGTTCGGAATTACTGGGCGTAAAGCGCGCGCAGGCGGGTCATCAAGTCAGAGGTGAAAGCCCGGAGCTTAACTCCGGAATAGCCTTTGAAACTGTTGGTCTTGAGTACGGGAGAGGTGAGTGGAATTCCCAGTGTAGAGGTGAAATTCGTAGATATTGGGAAGAACACCAGTGGCGAAGGCGGCTCACTGGCCCGTTACTGACGCTCAGGCG
ASV_725	0	0	0	0	0	0	72	0	0	0	0	0	0	0	0	0	0	0	0	0	0	Bacteria	Proteobacteria	Alphaproteobacteria	Acetobacterales	Acetobacteraceae	NA	NA	CGTTGCTCGGAATGACTGGGCGTAAAGGGCGCGTAGGCGGCTGTTACAGTCAGATGTGAAATTCCTGGGCTCAACCTGGGGGCTGCATTTGATACGTGATGGCTGGAGTGGGGAAGAGGGTCGTGGAATTCCCAGTGTAGAGGTGAAATTCGTAGATATTGGGAAGAACACCGGTGGCGAAGGCGGCGACCTGGTCCTTGACTGACGCTGAGGCG
ASV_726	0	0	0	0	0	0	0	0	8	0	0	0	0	0	0	0	39	25	0	0	0	Bacteria	Planctomycetota	Planctomycetes	Gemmatales	Gemmataceae	NA	NA	ATGTGTCAGCGCCGCGGTAAGACGAACCGTGCAAACGTTGTTCGGAATCACTGGGCTTAAAGGGCGCGTAGGCGGGCTGTCAAGTCAGGGGTGAAATCTTTCGGCTCAACCGGAAAACTGCCTTTGATACTGACGGCCTTGAGGGAGGTAGGGGCATGTGGAACTTCCAGTGGAGCGGTGAAATGCGTTGATATTGGAAGGAACGCCGGTGGCGA
ASV_727	0	0	0	0	0	0	0	0	0	0	72	0	0	0	0	0	0	0	0	0	0	Bacteria	GAL15	NA	NA	NA	NA	NA	CGTTGTCCGGAATACTGGGCGTAAAGCGCGTGTAGGCGGCCTGGTAAGTCCCGTGTGAAAGCCTACGGCTCAACTGTAGGAGGTCGCGGGATACTGCTAGGCTTGAGGGCAGGAGAGGGAAGTAGAATTCCCGGTGTAGCGGTGAAATGCGTAGATATCGGGAGGAACACCAGTGGCGAAGGCGGCCTTCTGGACGGATACTGACGCTGATGCGC
ASV_728	0	0	0	0	0	0	0	0	0	0	0	0	0	0	0	0	0	72	0	0	0	Bacteria	Armatimonadota	Armatimonadia	Armatimonadales	NA	NA	NA	CGTTGTCCGAATTTACTGGGCGTAAAGCGCGCGTAGGCGGCTATTTAAGTCTGGGGTGAAAGGTTCGACGCTCAACGTGAACAGTGCCTTGGATACTGGGTGGCTTGAGTCTGGGAGAGGGTAGTGGAATTCCTGGTGTAGCGGTGAAATGCGTAGATATCAGGAGGAACACCGGTGGCGAAGGCGGCTACCTGGCCTAAGACTGACGCTGAGGT
ASV_729	0	70	0	0	0	0	0	0	0	0	0	0	0	0	0	0	0	0	0	0	0	Bacteria	Planctomycetota	Planctomycetes	Gemmatales	Gemmataceae	NA	NA	GACGAACCGTGCAAACGTTGTTCGGAATCACTGGGCTTAAAGGGCGCGTAGGCGGGCTGTCAAGTCAGGGGTGAAATCTTTCGGCTCAACCGGAAAACTGCCTTTGATACTGACGGCCTTGAGGGAGGTAGGGGCATGTGGAACTTCCAGTGGAGCGGTGAAATGCGTTGATATTGGAAGGAACGCCGGTGGCGAAAGCGACGTGCTGGACCTCTTCTGACGCTGAGGCGCGAAAGCTAGGGGAGC
ASV_730	0	0	0	0	35	0	0	0	0	35	0	0	0	0	0	0	0	0	0	0	0	Bacteria	Bdellovibrionota	Oligoflexia	0319-6G20	NA	NA	NA	CGTTGCTCGGAATTATTGGGCGTAAAGGGTAGGTAGGTGGTCTCATTTGTCTAGGGTGAAAGCCTTGAGCTTAACTCAAGAAGTGCCCTAGAAACGGTGAGACTAGAGTCTTGGAGAGGGTCGTGGAATTCCCGGTGTAGCGGTGAAATGCGTAGAGATCGGGAGGAACACCAGAGGCGAAGGCGGCGACCTGGACAAGTACTGACACTCAACTA
ASV_731	0	0	0	0	0	0	45	18	0	0	0	0	0	7	0	0	0	0	0	0	0	Bacteria	Chloroflexi	Chloroflexia	Elev-1554	NA	NA	NA	CGTTGTCCGGATTTATTGGGCGTAAAGGGCGCGTAGGCGGCCGGGCGCATCCGGCGTGAAATCTCCCCGCTCAACGGGGAGGGGTCGGCGGAGATGGCGTGGCTAGAGGACGGTAGAGGCAGATGGAAGTCCCGCAGTAGTGGTGAAATGCGTAGAGAGCGGGAGGAACACCAGAGGCGAAGGCGATCTGCTGGGCCGGACCTGACGCTGAGGCG
ASV_732	0	0	0	0	0	0	0	57	0	0	0	0	0	13	0	0	0	0	0	0	0	Bacteria	Acidobacteriota	Acidobacteriae	Acidobacteriales	Acidobacteriaceae (Subgroup 1)	Edaphobacter	NA	CGTTGTTCGGAATTATTGGGCGTAAAGGGTGCGTAGGCGGTTTGACAAGTCTTATGTGAAATCTCTGGGCTCAACCCAGAGTCTGCATGGGAAACTGTCGGGCTTGAGTATGGGAGAGGTGAGTGGAATTTCCGGTGTAGCGGTGAAATGCGTAGATATCGGAAGGAACACCTGTGGCGAAAGCGGCTCACTGGACCATAACTGACGCTGAGGCA
ASV_733	0	0	0	0	0	0	0	50	0	0	0	0	0	20	0	0	0	0	0	0	0	Bacteria	Actinobacteriota	Actinobacteria	Frankiales	Geodermatophilaceae	Antricoccus	NA	CGTTGTCCGGAATTATTGGGCGTAAAGAGTTCGTAGGCGGTTTGTCACGTCGGCTGTGAAATCCCGAGGCTTAACCTCGGGCCTGCAGTCGATACGGGCAGACTAGAGTGAAGTAGGGGAGACTGGAATTCCTGGTGTAGCGGTGAAATGCGCAGATATCAGGAAGAACACCGATGGCGAAGGCAGGTCTCTGGGCTTTAACTGACGCTGAGGAA
ASV_734	0	0	0	0	0	0	0	34	0	0	0	0	0	36	0	0	0	0	0	0	0	Bacteria	Actinobacteriota	Actinobacteria	Micrococcales	Dermacoccaceae	NA	NA	CGTTGTCCGGAATTATTGGGCGTAAAGAGCTTGTAGGCGGTTTGTCGCGTCTGCTGTGAAAGCCCGGGGCTTAACTCCGGGTCTGCAGTGGGTACGGGCAGGCTAGAGTATGGTAGGGGAGACTGGAATTCCTGGTGTAGCGGTGAAATGCGCAGATATCAGGAGGAACACCGATGGCGAAGGCAGGTCTCTGGGCCATTACTGACGCTGAGAAG
ASV_735	0	0	0	0	0	0	0	0	0	54	0	0	16	0	0	0	0	0	0	0	0	Bacteria	Chloroflexi	JG30-KF-CM66	NA	NA	NA	NA	CGTTGTCCGGATTTATTGGGCGTAAAGCGCGCGCAGGCGGTTCGTTAAGTCCGGTGTGAAAGCTCCCGGCTCAACTGGGAGAGGCCACTGGATACTGGCGGACTTGAGGCAGGCAGAGGAAGGTGGAATTCCGGGTGTAGTGGTGAAATGCGTAGATATCCGGAGGAACACCAGTGGCGAAGGCGGCCTTCTGGGCCTGTCCTGACGCTGAGGCG
ASV_736	0	0	0	0	0	0	0	0	0	0	0	70	0	0	0	0	0	0	0	0	0	Bacteria	Proteobacteria	Gammaproteobacteria	Xanthomonadales	Rhodanobacteraceae	Chujaibacter	NA	CGTTAATCGGAATTACTGGGCGTAAAGCGTGCGCAGGCGGTTTGTTAAGTCCATTGTGAAAGCCCCGAGCTCAACTTGGGAATTGCAGTGGATACTGGCAGGCTGGAGTACGGTAGAGGAAGGTGGAATTCCCGGTGTAGCAGTGAAATGCGTAGATATCGGGAGGAACACCAGTGGCGAAGGCGGCCTTCTGGACCAGTACTGACGCTCATGCA
ASV_737	0	69	0	0	0	0	0	0	0	0	0	0	0	0	0	0	0	0	0	0	0	Bacteria	Cyanobacteria	Cyanobacteriia	Cyanobacteriales	Nostocaceae	Mastigocladopsis PCC-10914	NA	TACGGAGGATGCAAGCGTTATCCGGAATGATTGGGCGTAAAGCGTCCGCAGGTGGCAATGTAAGTCTGCTGTCAAAGCGTCTGGCTCAACCAGATACAGGCAGTGGAAACTACATAGCTAGAGTAAGGTAGGGGTAGAGGGAATTCCTGGTGTAGCGGTGAAATGCGTAGAGATCAGGAAGAACACCGGTGGCGAAGGCGCTCTGCTGGACCTTAACTGACACTGAGGGACGAAAGCTAGGGGAGC
ASV_738	0	0	12	0	0	7	0	0	7	0	0	0	0	4	7	0	0	0	15	17	0	Bacteria	NA	NA	NA	NA	NA	NA	CGTTGTCCGGATTTACTGGGCGTAAAGGGCACGTAGGCGGTTCGGCAAGTTGGTGGTGAAATCGCCCGGCTCAACCGGGCTGAGGTCCGCCAAGACTGCCGGACTCGAGGGCAGGCGAGGGAGATGGAATTCCCCGAGGAGCGGTGAAATGCGTAGAGACGGGGAGGAACACCGGTGGCGAAGGCGGTCTCCTGGACTGCCCCTGACGCTGAGGT
ASV_739	0	0	28	0	0	0	0	0	0	0	0	41	0	0	0	0	0	0	0	0	0	Archaea	Crenarchaeota	Nitrososphaeria	SCGC AB-179-E04	NA	NA	NA	TGGTCGGGACGATTATTGGGCCTAAAGCATCCGTAGCCGGCTTCACAGGTCTCTTGTTAAATCCAACGGCTCAACCGTTGGACCGCAGAGAGTACCATGGAGCTAGGGGGCGGGAGAGGCGGACGGTACTCCATGGGTAGGGGTAAAATCCTTTGATCCATGGAAGACCACCAGTGGCGAAGGCGGTCCGCTAGAACGCGCCCGACGGTGAGGGA
ASV_740	0	0	0	0	69	0	0	0	0	0	0	0	0	0	0	0	0	0	0	0	0	Bacteria	Planctomycetota	Planctomycetes	Gemmatales	Gemmataceae	NA	NA	CGTTGTTCGGAATCACTGGGCGTAAAGGGCGCGTAGGCGTCTCGTCAGTCCGGGGTGAAATCTTTCGGCTTAACCGGAAAAGGGCCTCGGATACTACGAGACTGGAGGGGGAGAGGGGCGGACGGAACTTCCGGTGGAGCGGTGAAATGCGTTGATATCGGAAGGAACGCCGGTGGCGAAAGCGGTCCGCTGGATCCCTACTGACGCTGAGGCGC
ASV_741	0	0	0	0	59	0	0	0	0	0	10	0	0	0	0	0	0	0	0	0	0	Bacteria	Chloroflexi	Chloroflexia	Elev-1554	NA	NA	NA	CGTTGTCCGGAATTACTGGGCGTAAAGAGCGCGTAGGCGGCGCGGTACATCCGCGGTAAAAGCCCCTGGCTCAACTAGGGGAAGCCCGCGGCGATGGCCGTGCTAGAGGGTGGTAGAGGCAGGCGGAAGTCCCGAAGTAGTGGTGAAATGCGTAGAGATCGGGAGGAACACCAGTGGCGAAGGCGGCCTGCTGGGCCACGACGTGACGCTGAGGC
ASV_742	0	0	0	0	11	0	0	0	5	0	20	0	10	0	0	0	12	11	0	0	0	Bacteria	Chloroflexi	NA	NA	NA	NA	NA	CGTTGTCCGGATTTACTGGGCGTAAAGCGCGCGCAGGCGGCCGGCTAAGTGGGGCGTGAAAGCTCCCGGCTCAACCGGGAGAGGCCGCCCCAGACTGGCCGGCTGGAGGCCGGTAGAGGCGGGTGGAACTCCCGGTGTAGTGGTGAAATGCGTAGAGATCGGGAAGAACACCAGTGGCGAAGGCGGCCCGCTGGGCCGGGCCTGACGCTGAGGCG
ASV_743	0	0	0	0	69	0	0	0	0	0	0	0	0	0	0	0	0	0	0	0	0	Bacteria	WPS-2	NA	NA	NA	NA	NA	CGTTATTCGGAATTATTGGGCGTAAAGCGCTCGTAGGCGGGACAGGAAGTCCGTGAAGAAAGACCTGGGCTCAACTCAGGGAACGGCACGGATACTCTTGTTCTTGAGGCAATCAGAGGGTGATGGAATTCCCGGTGTAGCGGTGAAATGCGTAGATATCGGGAGGAACACCAGTGGCGAAGGCGATCACCTGGGGTTGTTCTGACGCTGAGGAG
ASV_745	0	0	0	21	0	47	0	0	0	0	0	0	0	0	0	0	0	0	0	0	0	Bacteria	Actinobacteriota	Acidimicrobiia	NA	NA	NA	NA	CGTTGTCCGGATTCATTGGGCGTAAAGAGCTCGTAGGCGGCTTGGTAAGTCGGGTGTGAAACCCCCAGGCTCAACCTGGGGCCGCCACTCGATACTGCCATGGCTCGAGTCCGGTAGGGGCCCATGGAATTCCTGGTGTAGCGGTGAAATGCGCAGATATCAGGAGGAACACCAGTGGCGAAGGCGGTGGGCTGGGCCGGTACTGACGCTGAGGA
ASV_746	0	0	0	0	0	0	0	31	0	0	0	0	0	37	0	0	0	0	0	0	0	Bacteria	Proteobacteria	Alphaproteobacteria	Acetobacterales	Acetobacteraceae	NA	NA	CGTTGCTCGGAATGACTGGGCGTAAAGGGCGCGTAGGCGGATTGATTTGTCAGGCGTGAAAGTCCTGGGCTTAACCTGGGGATGGCGTTTGGGACGGTTGATCTAGAGTGGGGAAGAGGGTTGTGGAATTCCCAGTGTAGAGGTGAAATTCGTAGATATTGGGAAGAACACCGGTGGCGAAGGCGGCGACCTGGTCCTTTTACTGACGCTGAGGC
ASV_747	0	0	0	0	0	0	0	0	0	0	0	0	0	0	0	0	0	0	0	38	30	Bacteria	Cyanobacteria	Vampirivibrionia	Obscuribacterales	Obscuribacteraceae	NA	NA	CGTTGTCCGGATTTATTGGGCGTAAAGAGTTCGTAGGTGGTTTGTTAAGTCTGATGTTAAAGACTGGGGCTCAACCTCGGAAATGCATTGGATACTGGCAGACTCGAGTGCAGTAGAGGCAAGTGGAATTCCAGGTGTAGCGGTGAAATGCGTAGATATCTGGAAGAACACCGGTGGCGCAAGCGACTTGCTGGGCTGTAACTGACGCTGAGGAA
ASV_749	0	0	15	14	0	9	18	0	0	0	0	11	0	0	0	0	0	0	0	0	0	Bacteria	NA	NA	NA	NA	NA	NA	CGTTGTCCGGAATTACTGGGCGTAAAGCGCGCGCAGGCGGCCCGCTAGGCGGCCCGTGAAAGGCCCCGGCTCAACCGGGGATGGTCGGGTCGAACCATCGGGCTGGAGGGCGGTAGAGGCGGGTGGAATTCCCGGTGGAGCAGTGATATGCGTAGATACCGGGAGGAACACCAGCGGCGAAGGCGGCCCGTTGGGCCGTCCCTGACGCTGAGGCG
ASV_750	0	0	0	0	30	0	0	0	0	0	0	0	8	0	2	0	0	27	0	0	0	Bacteria	Acidobacteriota	Acidobacteriae	Bryobacterales	Bryobacteraceae	Bryobacter	NA	CGTTGTTCGGAGTTACTGGGCGTAAAGAGTGTGTAGGCTGTTCTCTAAGTTTGGTGTGAAATCTCCCGGCTTAACTGGGAGGGTGCGCCGAAAACTGGAGGCCTTGAGTATGGGAGAGGAAAGCGGAATTCCTGGTGTAGCGGTGAAATGCGTAGATATCAGGAGGAACACCTGCGGTGTAGACGGCTTTCTGGACCATCACTGACGCTGAGACA
ASV_751	0	0	0	0	7	0	0	0	20	8	0	0	4	0	0	13	8	7	0	0	0	Bacteria	WPS-2	NA	NA	NA	NA	NA	CGTTGTCCGGAATTACTGGGCGTAAAGAGCTCGTAGGCGGGAGCGTGCGTCCGAGAGGAAATCTCAAGGCTCAACTTTGGGGCTATCTCGGATACGGCGCTTCTTGAGGGTAAGAGAGGAAAGTAGAATTCCCGGTGTAGCGGTGAAATGCGTAGATATCGGGAGGAATACCAGTGGCGAAGGCGACTTTCTGGCTTATTCCTGACGCTGAGGAG
ASV_752	0	0	0	0	0	0	22	0	0	0	0	0	0	45	0	0	0	0	0	0	0	Bacteria	NA	NA	NA	NA	NA	NA	CGTTGTCCGGAATCACTGGGCGTAAAGCGCGCGTAGGCGGCGCGGTACATCCCTCGTGAAAGCGCCCGGCTCAACCGGGCGAGGCCGGGGGCGATGGCTGCGCTGGAGGGCGGTAGAGGCAGGCGGAAGGCCCGAAGTAGTGGTGAAATGCGTAGAGATCGGGCGGAACACCAGTGGCGAAGGCGGCCTGCTGGGCCGGCCCTGACGCTGAGGCG
ASV_753	0	0	23	34	0	0	0	0	0	0	0	9	0	0	0	0	0	0	0	0	0	Bacteria	WPS-2	NA	NA	NA	NA	NA	CGTTGTTCGGAATCATTGGGCGTAAAGCGCGCGTAGGCGGGACAGCAAGTCTGTGAAGAAAGACCCCGGCTTAACTGGGGGACCGGCATAGATACTGTTGTTCTTGAGATGGTCAGAGGGTGATGGAATTCCCGGTGTAGCGGTGAAATGCGTAGATATCGGGAGGAACACCAGTGGCGAAGGCGATCACCTGGGGCTAATCTGACGCTGAGGCG
ASV_754	0	0	0	0	53	0	0	0	0	0	0	0	13	0	0	0	0	0	0	0	0	Bacteria	WPS-2	NA	NA	NA	NA	NA	CGTTATTCGGAATTATTGGGCGTAAAGCGCTCGTAGGCGGGACCGAAAGTCGGTGAGGAAAGACCTGGGCTCAACTCAGGGAACTGCATCGATACTTCGGTTCTTGAGGTAATCAGAGGGTGATGGAATTCCCGGTGTAGCGGTGAAATGCGTAGATATCGGGAGGAACACCAGTGGCGAAGGCGATCACCTGGGGTTATTCTGACGCTGAGGAG
ASV_755	0	0	0	0	0	58	0	0	0	0	0	0	0	8	0	0	0	0	0	0	0	Bacteria	Chloroflexi	OLB14	NA	NA	NA	NA	CGTTGTCCGGATTTACTGGGCGTAAAGCGCCCGCAGGCGGCCAGGCAAGTCCAGGGTGAAATCTCCCGGCTCAACCGGGAGGGGTCCTTGGAAACTGCCTGGCTTGAGGCAGGGAGAGGGATGTGGAATTCCCGGTGTAGTGGTGAAATACGTAGATATCGGGAGGAACACCAGTGGCGAAGGCGGCATCCTGGCCCTGTCCTGACGCTCAGGGG
ASV_756	0	0	0	0	0	34	5	0	0	0	0	0	0	6	0	0	0	0	21	0	0	Bacteria	Chloroflexi	NA	NA	NA	NA	NA	CGTTGTCCGGATTTATTGGGCGTAAAGGGCGTGTAGGCGGCTCTGCAAGTGGTGGGTGAAATCGCCCGGCTCAACCGGGCGGGGTCCTAGCAGACTGTGGAGCTGGAGGCCGGTAGGGGCGCGTGGAATTCCCGGTGTAGTGGTGAAATGCGTAGAGATCGGGAGGAACACCGGTGGCGAAGGCGGCGCGCTGGGCCGAGCCTGACGCTGAGGCG
ASV_757	0	0	0	0	0	0	0	0	0	0	0	0	0	0	0	7	0	59	0	0	0	Bacteria	Chloroflexi	Ktedonobacteria	B12-WMSP1	NA	NA	NA	CGTTGTCCGGAATTACTGGGCGTAAAGAGCGCGTAGGCGGCGCTGTACGACATGTGTGAAAGCCCCCGGCTCAACTGGGGAGGGTCATGTGTAACGGCAGTGCTTGAGTGCAGGAGAGGGAAGTGGAACTCCGGGAGTAGCGGTGAAATGCGTAGATACCCGGAGGAACACCAGTGGCGAAGGCGGCTTCCTGGTCTGCGACTGACGCTGTGGCG
ASV_759	0	0	0	0	0	65	0	0	0	0	0	0	0	0	0	0	0	0	0	0	0	Bacteria	Proteobacteria	Alphaproteobacteria	Sphingomonadales	Sphingomonadaceae	NA	NA	CGTTGTTCAGAATTACTGGGCGTAAAGCGCACGTAGGCGGCTTCGCAAGTCAGAGGTGAAAGCCCGGAGCTTAACTCCGGAATTGCCTTTGAGACTGTGTCGCTAGAATCCGGGAGAGGTGAGTGGAATTCCGAGTGTAGAGGTGAAATTCGTAGATATTCGGAAGAACACCAGTGGCGAAGGCGGCTCACTGGACCGGTATTGACGCTGAGGTG
ASV_760	0	0	0	0	0	65	0	0	0	0	0	0	0	0	0	0	0	0	0	0	0	Bacteria	Verrucomicrobiota	Verrucomicrobiae	Chthoniobacterales	Chthoniobacteraceae	Candidatus Udaeobacter	NA	GTGTCAGCGCCGCGGTAATACAGAGGTCTCAAGCGTTGTTCGGATTCATTGGGCGTAAAGGGTGCGTAGGCGGCGCGGTAAGTCGGGTGTGAAATCTCGGAGCTTAACTCCGAAACTGCATTCGATACTGCCGCGCTCGAGGACTGGAGAGGAGACTGGAATTCACGGTGTAGCGGTGAAATGCGTAGATATCGTGAGGAAGACCAGTGGCGAAG
ASV_761	0	0	0	0	0	0	0	2	0	0	0	63	0	0	0	0	0	0	0	0	0	Bacteria	Chloroflexi	Ktedonobacteria	Ktedonobacterales	Ktedonobacteraceae	NA	NA	CGTTCTCCGGAATGACTGGGCGTAAAGGGCACGCAGGCGGTCGCGCGCGTGTCGGGTGAAAGTTCCCGCGTGAATCGGGAAGGGTCTCGGCAAACGGCGCGACTTGAGAGCGAGAGAGGGACATGGAATTCCTGGTGGAGCGGTGAAATGCGTAGAGATCAGGAAGAACACCGAAGGCGAAGGCAGTGTCCTGGCTCGTCTCTGACGCTCAGGTG
ASV_762	64	0	0	0	0	0	0	0	0	0	0	0	0	0	0	0	0	0	0	0	0	Bacteria	Dadabacteria	Dadabacteriia	Dadabacteriales	NA	NA	NA	TACGGAGGGGGCAAGCGTTGCTCGGATTTACTGGGCGTAAAGGGTCCGTAGGTGGCTCTGTAAGTTAGATGTGAAATCTCAGGGCTTAACCCTGAAATTGCATCTAAAACTGCGGAGCTTGAGTTCGGAAGAGGTTGGCGGAATTCCCGGTGTAGCGGTGAAATGCGTAGATATCGGGAGGAACACCAGTGGCGAAGGCGGCCAACTGGTCCGACACTGACACTGAGGGACGAAAGCGTGGGGAGC
ASV_763	64	0	0	0	0	0	0	0	0	0	0	0	0	0	0	0	0	0	0	0	0	Bacteria	Armatimonadota	Chthonomonadetes	Chthonomonadales	NA	NA	NA	AACGTAGGGGGCGAGCGTTGCCCGGATTTACTGGGCGTAAAGCGCGCGTAGGCGGCTGCGTAAGTGGGGAGTTAAAGCCCTCGGCTCAACCGAGGAAATGCTCCTCAAACTGCGCGGCTTGAGTGTAGGAGAGGGGAGTGGAATTCCCGGTGTAGCGGTGAAATGCGTTGATATCGGGAGGAACACCAGTGGCGAAGGCGGCTCCCTGGCCTACTACTGACGCTGAGGCGCGAAAGCGTGGGGAGC
ASV_764	0	64	0	0	0	0	0	0	0	0	0	0	0	0	0	0	0	0	0	0	0	Bacteria	Planctomycetota	Planctomycetes	Gemmatales	Gemmataceae	NA	NA	GACGAACCGTCCTAACGTTGTTCGGAATCACTGGGCTTAAAGGGCGCGTAGGCGGGCAGCCAAGTCTGAGGTGAAATCTTTCGGCTTAACCGGAAAATAGCCTTGGATACTGGCAGTCTCGAGGGAGGTAGGGGCATGTGGAACTTCCGGTGGAGCGGTGAAATGCGTTGATATCGGAAGGAACGCCGGTGGCGAAAGCGACGTGCTGGACCTCTACTGACGCTGAGGCGCGAAAGCCAGGGGAGC
ASV_765	0	64	0	0	0	0	0	0	0	0	0	0	0	0	0	0	0	0	0	0	0	Bacteria	Actinobacteriota	Acidimicrobiia	IMCC26256	NA	NA	NA	TACGTAGGGGGCGAGCGTTGTCCGGATTTATTGGGCGTAAAGAGCTCGTAGGCGGTTTGGTAAGTCGGATGTGAAATCTCCACGCTCAACGTGGAGGCGCCATTCGAAACTGCCATGACTCGAGTCCGGTAGGGGAGTGTGGAATTTCCGGTGTAGCGGTGAAATGCGCAGAGATCGGAAGGAACACCCGTAGCGAAGGCGGCACTCTGGGCCGGTACTGACGCTGAGGAGCGAAAGCGTGGGGAG
ASV_766	0	64	0	0	0	0	0	0	0	0	0	0	0	0	0	0	0	0	0	0	0	Bacteria	Proteobacteria	Alphaproteobacteria	Caulobacterales	Caulobacteraceae	NA	NA	TACGAAGGGGGCTAGCGTTGCTCGGAATTACTGGGCGTAAAGGGCGCGTAGGCGGATGTTTAAGTCAGAGGTGAAAGCCCAGGGCTCAACCTTGGAACTGCCTTTGATACTGGACATCTTGAGTATGGGAGAGGTGAGTGGAACTCCGAGTGTAGAGGTGAAATTCGTAGATATTCGGAAGAACACCAGTGGCGAAGGCGACTCACTGGCCCATTACTGACGCTGAGGCGCGAAAGCGTGGGGAGC
ASV_767	0	0	7	0	0	46	3	0	0	0	0	0	0	8	0	0	0	0	0	0	0	Bacteria	Acidobacteriota	Acidobacteriae	NA	NA	NA	NA	CGTTGTTCGGAGTTACTGGGCGTAAAGAGTGTGTAGGCGGCGGGCCGCGTCTGGTGTGAAATCTCCCGGCTTAACCGGGAGGGTGCGCCGGAAACGGGCCGGCTTGGAGTATGGGAGAGGGAAGCGGAATTCCTGGTGTAGCGGTGAAATGCGTAGATATCAGGAGGAACACCGGTGGTGTAGACGGCTTCCTGGACCATGACTGACGCTGAGAC
ASV_768	0	0	0	0	0	0	0	0	0	33	0	0	0	0	17	0	0	0	14	0	0	Bacteria	Chloroflexi	Ktedonobacteria	Ktedonobacterales	JG30-KF-AS9	NA	NA	CGTTGTCCGGAATTATTGGGCGTAAAGGGCGCGCAGGCGGCCTGCCGCGTGTCTGGTGAAAGCGCCGGCTTAACCGGGCGAGGTCCAGGCAAACGGGCAGGCTTGAGCGTCGGAGAGGGGCATGGAACTCCGGGTGGAGCGGTGAAATGCGTAGAGATCCGGAAGAACACCCATGGCGAAGGCAGTGCCCTGGCCGACGGCTGACGCTCAGGCGC
ASV_769	0	0	0	0	0	0	0	0	0	0	0	40	0	24	0	0	0	0	0	0	0	Bacteria	Actinobacteriota	Thermoleophilia	Solirubrobacterales	Solirubrobacteraceae	Conexibacter	NA	CGTTGTCCGGAATCATTGGGCGTAAAGAGCGTGTAGGCGGCTCGATAAGTCCGCTGTGAAAGTCCAGGGCTCAACCCTGGAAAGCCGGTGGAAACTGTCGAGCTAGAGTCCGGAAGGGGCGAGTGGAATTCCTGGTGTAGCGGTGAAATGCGCAGATATCAGGAGGAACACCAATGGCGAAGGCAGCTCGCTGGGACGGTACTGACGCTGAGACG
ASV_770	0	0	63	0	0	0	0	0	0	0	0	0	0	0	0	0	0	0	0	0	0	Bacteria	Patescibacteria	Parcubacteria	GW2011-GWA2-46-7	NA	NA	NA	CGTTACCCGGATTTACTGGGCGTAAAGGACCCACAGGCGGAGGTACAAGTTATCCCTAAAAGCACTCGAGCCCAACTCGAGTGAAGAGGGATAATACTGTACCTCTAGAGTCTGCCAGGGGCCGGCGGAACGGTCGGTGTAGGGGTGAAATCCGATGATATCGACCGGAACGCCGAAGGCGAAGGCAGCCGGCTAGGGCAGAACTGACGCTGATT
ASV_771	0	0	11	20	0	0	11	0	0	0	0	21	0	0	0	0	0	0	0	0	0	Bacteria	Proteobacteria	Alphaproteobacteria	Acetobacterales	Acetobacteraceae	NA	NA	CGTTGCTCGGAATGACTGGGCGTAAAGGGCGCGTAGGCGGTTTATGCAGTCGGGCGTGAAATTCCTGGGCTCAACCTGGGGGCTGCGCACGAGACGCATGGACTAGAGTAGGGAAGAGGGTCGTGGAATTCCCAGTGTAGAGGTGAAATTCGTAGATATTGGGAAGAACACCGGTGGCGAAGGCGGCGACCTGGTCCTTGACTGACGCTGAGGCG
ASV_772	0	0	0	0	50	0	0	0	0	0	0	0	13	0	0	0	0	0	0	0	0	Bacteria	Actinobacteriota	Acidimicrobiia	IMCC26256	NA	NA	NA	CGTTGTCCGGATTTATTGGGCGTAAAGAGCTCGTAGGCGGTTTGGTGAGTCGGGTGTGAAATCTCCACGCTCAACGTGGAGGGGCCACCCGATACTGCCATGACTAGAGTCCGGTAGGGGAGTGTGGAATTCCCGGTGTAGCGGTGAAATGCGCAGATATCGGGAGGAACACCAGTAGCGAAGGCGACACTCTGGGCCGGTACTGACGCTGAGGA
ASV_773	0	0	0	0	0	63	0	0	0	0	0	0	0	0	0	0	0	0	0	0	0	Bacteria	Nitrospirota	Nitrospiria	Nitrospirales	Nitrospiraceae	Nitrospira	NA	CGTTGTTCGGATTTACTGGGCGTAAAGGGAGCGTAGGCGGTTTGGTAAGACCGGTGGGAAAGCCCGGAGCTTAACTCCGGAAGGTCACCGGTGACTGCCAAGCTAGAGGACGGGAGAGGAGCGCGGAATTCCCGGTGTAGCGGTGAAATGCGTAGAGATCGGGAGGAAGGCCGGTGGCGAAGGCGGCGCGCTGGAACGTTCCTGACGCTGAGGCT
ASV_774	0	0	0	0	0	0	25	12	0	0	0	0	0	26	0	0	0	0	0	0	0	Bacteria	Proteobacteria	Alphaproteobacteria	Acetobacterales	Acetobacteraceae	Acidisoma	tundrae	CGTTGCTCGGAATGACTGGGCGTAAAGGGCGCGTAGGCGGCGATCAAAGTCAGGCGTGAAATTCCTGGGCTCAACCTGGGGGCTGCGCTTGATACTTGGTTGCTTGAGTGGGGAAGAGGGTCGTGGAATTCCCAGTGTAGAGGTGAAATTCGTAGATATTGGGAAGAACACCGGTGGCGAAGGCGGCGACCTGGTCCTTGACTGACGCTGAGGCG
ASV_775	0	0	0	0	0	0	0	0	23	0	0	0	0	0	0	9	15	16	0	0	0	Bacteria	Bacteroidota	Bacteroidia	Cytophagales	Amoebophilaceae	Candidatus Amoebophilus	NA	CGTTATCCGGATTTACTGGGTTTAAAGGGTGCGTAGGCGCTCTTTAAGTCAGTGGTGAAAGCCTAGTGCTTAACACTAGAAATGCCATTGAAACTAAAGAGCTTGAATCAAGGAGAGGTAAGCAGAATTTATAGTGTAGCAGTGAAATGCTTAGATACTATAAGGAATACCAACAGCGAAGGCAGCTTACTGGCCTTGTATTGACGCTGAGGCAC
ASV_776	0	0	0	0	0	0	0	0	6	0	4	0	23	0	0	4	17	5	0	0	4	Bacteria	Proteobacteria	Gammaproteobacteria	NA	NA	NA	NA	CGTTAATCGGAATTACTGGGCGTAAAGGGTGCGTAGGCGGTTTATTAAGTGAGATGTGAAAGACCCGGGCTTAACCTGGGGGTGTCATCTTAAACTGGTAAACTAGAGTGAAGGAGAGGGTAGTGGAATTTCCGGAGTAGCGGTGAAATGCGTAGATCTCGGAAAGAACACCGGTGGCGAAGGCGGCTACCTGGCCTTCAACTGACGCTGAGGCA
ASV_777	0	0	0	0	0	0	0	0	0	0	5	0	0	0	0	0	8	50	0	0	0	Bacteria	Proteobacteria	Gammaproteobacteria	NA	NA	NA	NA	CGTTAATCGGAATTACTGGGCGTAAAGCGTACGTAGGCGGTTTGGTAAGTCGATTGTGAAATCCCCGGGCTCAACCTGGGAATTGCAGTCGAGACTGCCTGGCTAGAATGCGGTAGAGGGAAGCGGAATTTCCGGTGTAGCAGTGAAATGCGTAGATATCGGAAGGAACATCAGTGGCGAAAGCGGCTTCCTGGACCAGCATTGACGCTCAGGTA
ASV_779	0	62	0	0	0	0	0	0	0	0	0	0	0	0	0	0	0	0	0	0	0	Bacteria	Proteobacteria	Alphaproteobacteria	Sphingomonadales	Sphingomonadaceae	NA	NA	TACGGAGGGGGCAAGCGTTGTTCGGAATTACTGGGCGTAAAGCGCACGTAGGCGGCTATTCAAGTCAGAGGTGAAAGCCCGGGGCTCAACTCCGGAACTGCCTTTGAAACTAGGTAGCTTGAACATTGGAGAGGCGAGTGGAATTCCGAGTGTAGAGGTGAAATTCGTAGATATTCGGAAGAACACCAGTGGCGAAGGCGACTCGCTGGACAATTGTTGACGCTGAGGTGCGAAAGCGTGGGGAGC
ASV_780	0	0	0	0	46	0	0	0	0	0	0	0	16	0	0	0	0	0	0	0	0	Bacteria	Armatimonadota	NA	NA	NA	NA	NA	CGTTGTCCGGATTTACTGGGCGTAAAGCGCGTGTAGGCGGCCGGATAAGTCGGGTGTGAAAGCCCGGGGCTCAACCCCGGGATGCCGCCCGAGACTGTTTGGCTTGAGGACGGAAGAGGGGCGTGGAATTCCTGGTGTAGCGGTGAAATGCGTAGAGATCAGGAGGAACACCCGTGGCGAAGGCGGCGCCCTGGTCCGTTTCTAACGCTGAGACG
ASV_781	0	61	0	0	0	0	0	0	0	0	0	0	0	0	0	0	0	0	0	0	0	Bacteria	Acidobacteriota	Acidobacteriae	Bryobacterales	Bryobacteraceae	Bryobacter	NA	TACGTAGGCAGCAAGCGTTGTTCGGAGTTACTGGGCGTAAAGAGTGTGTAGGCGGTGCTCTAAGTTTGGTGTGAAATCTCCCGGCTCAACTGGGAGGGTGCGCCGAAAACTGGAGTGCTTGAGTATGGGAGAGGAAAGCGGAATTCCTGGTGTAGCGGTGAAATGCGTAGATATCAGGAGGAACACCTGCGGTGTAGACGGCTTTCTGGACCATCACTGACGCTGAGACACGAAAGCGTGGGTAGC
ASV_782	0	0	0	43	0	0	18	0	0	0	0	0	0	0	0	0	0	0	0	0	0	Bacteria	Dependentiae	Babeliae	Babeliales	Babeliaceae	NA	NA	CGTTATTCGGAATCATTGGGCGTAAAGGGTGTGTAGGCGGCATGATAAGTCAATTGTTAAAGACCTCGGCCTAACTGGGGAAAAGCAGTAGATACTATCTGTGCTAGAGGATGGAAGAGAGAAGTGGAATTCTTGGAGTAGCGGTAAAATGCGTAGATCTCAAGGGGAACACCGATGGCGAAGGCAGCTTCTTGGTCCATTCCTGACGCTAATGC
ASV_783	0	0	0	10	0	0	51	0	0	0	0	0	0	0	0	0	0	0	0	0	0	Bacteria	Acidobacteriota	Acidobacteriae	Acidobacteriales	Acidobacteriaceae (Subgroup 1)	Granulicella	NA	CGTTGTTCGGAATTATTGGGCGTAAAGGGTGCGTAGGCGGTTTGACAAGTCTTATGTGAAATCTTCGGGCTCAACCCGAAGTCTGCATAGGAAACTGTCGGGCTTGAGTATGGGAGAGGTGAGTGGAATTTCCGGTGTAGCGGTGAAATGCGTAGATATCGGAAGGAACACCTGTGGCGAAAGCGGCTCACTGGACCATAACTGACGCTGATGCA
ASV_784	0	0	0	28	0	0	33	0	0	0	0	0	0	0	0	0	0	0	0	0	0	Bacteria	Actinobacteriota	Actinobacteria	Frankiales	NA	NA	NA	CGTTGTCCGGAATTATTGGGCGTAAAGAGCTCGTAGGCGGTTTGTCGCGTCGGCTGTGAAAACCTGGGGCTCAACCCCGGGCCTGCAGCCGATACGGGCAGACTTGAGTTCGGCAGGGGAGACTGGAATTCCTGGTGTAGCGGTGAAATGCGCAGATATCAGGAGGAACACCGGTGGCGAAGGCGGGTCTCTGGGCCGATACTGACGCTGAGGAG
ASV_785	0	0	0	0	0	0	0	0	0	11	0	0	0	0	0	0	0	0	0	0	50	Bacteria	Cyanobacteria	Cyanobacteriia	Leptolyngbyales	Leptolyngbyaceae	Leptolyngbya PCC-6306	NA	ATGTGTCAGCGCCGCGGTAATACGGAGGATGCAAGCGTTATCCGGAATTATTGGGCGTAAAGCGTCCGTAGGTGGCGATACAAGTCTGTTGTTAAAGCGTGCGGCTCAACCGCATAAGGGCAATGGAAACTGTATGGCTAGAGTGCGATAGGGGTCACAGGAATTCCCAGTGTAGCGGTGAAATGCGTAGATATTGGGAAGAACACCAGCGGCGA
ASV_786	0	0	0	0	0	0	0	0	0	0	0	0	0	61	0	0	0	0	0	0	0	Bacteria	Proteobacteria	Alphaproteobacteria	Rhizobiales	Rhizobiaceae	NA	NA	CGTTGTTCGGAATTACTGGGCGTAAAGCGCACGTAGGCGGATATTTAAGTCAGGGGTGAAATCCCGGGGCTCAACCCCGGAACTGCCTTTGATACTGGGTATCTAGAGTATGGTAGAGGTGAGTGGAATTCCGAGTGTAGAGGTGAAATTCGTAGATATTCGGAGGAACACCAGTGGCGAAGGCGGCTCACTGGACCATTACTGACGCTGAGGTG
ASV_787	0	0	0	0	0	0	0	0	0	0	0	0	0	61	0	0	0	0	0	0	0	Archaea	Crenarchaeota	Nitrososphaeria	Nitrososphaerales	Nitrososphaeraceae	Candidatus Nitrocosmicus	NA	TGGTCGGGACGTTTATTGGGCCTAAAGCATCCGTAGCCGGTTCTACAAGTCTTCCGTTAAATCCAGCTGCTTAACAGATGGGCTGCGGAAGATACTATGGAGCTAGGAGGCGGGAGAGGCAAGCGGTACTCGATGGGTAGGGGTAAAATCCGTTGATCCATTGAAGACCACCAGTGGCGAAGGCGGCTTGCCAGAACGCGCTCGACGGTGAGGAT
ASV_788	0	0	0	33	0	14	5	0	0	0	0	0	0	8	0	0	0	0	0	0	0	Bacteria	Dependentiae	Babeliae	Babeliales	Babeliaceae	NA	NA	CGTTATTCGGATTAATTGGGCGTAAAGGGTGCGTAGGCGGCATACTAAGTCAACTGTTAAATTTCCCGGCCTAACCGGGAACCAGCAGTAGATACTGATGTGCTAGAGGACGGAAGAGAGAAGTGGAATTCTTGGAGTAGCGGTAAAATGTGTAGATCTCAAGAGGAACACCGATGGCGAAGGCAGCTTCTTGGTCCGTATCTGACGCTGATGCA
ASV_789	0	0	0	29	0	0	0	12	0	0	0	0	0	19	0	0	0	0	0	0	0	Bacteria	Proteobacteria	Gammaproteobacteria	Burkholderiales	Oxalobacteraceae	Noviherbaspirillum	NA	CGTTAATCGGAATTACTGGGCGTAAAGCGTGCGCAGGCGGTTGTGCAAGACCGATGTGAAATCCCCGGGCTCAACCTGGGAATGGCATTGGTGACTGTACGGCTAGAGTGTGTCAGAGGGGGGTAGAATTCCACGTGTAGCAGTGAAATGCGTAGAGATGTGGAGGAATACCGATGGCGAAGGCAGCCCCCTGGGATAACACTGACGCTCATGCA
ASV_790	0	0	0	0	23	0	0	0	0	10	14	0	8	0	0	0	5	0	0	0	0	Bacteria	Myxococcota	Polyangia	Polyangiales	Polyangiaceae	Pajaroellobacter	NA	CGTTGTTCGGAATTACTGGGCGTAAAGCGTGTGTAGGCGGCTTTGCAAGTCGGATGTGAAAGCCCCGGGCTCAACCCGGGAAGTGCACTCGATACTGCGAAGCTTGAGTGTCGGAGAGGTTGGTGGAATTCTCGGTGTAGAGGTGAAATTCGTAGATATCGAGAGGAACACCGGCGGCGAAGGCGGCCAACTGGACGAACACTGACGCTGAGACA
ASV_791	0	0	0	0	0	0	0	60	0	0	0	0	0	0	0	0	0	0	0	0	0	Bacteria	Planctomycetota	Planctomycetes	Isosphaerales	Isosphaeraceae	Paludisphaera	NA	CGTTATTCGGAATCACTGGGCTTAAAGCGCGTGTAGGCGGATGGGAACGTCGGAACCTGAAAGCCCCCGGCTCAACCGGGGAAGTGGGGCCGAAACGACCCGTCTGGAGGGACGTAGGGGGATCTGGAACTTCCGGTGGAGCGGTGAAATGCGTTGAGATCGGAAGGAACGCCCGTGGCGAAAGCGAGATCCTGGACGTTTTCTGACGCTGAGAC
ASV_792	0	0	0	0	0	0	0	0	0	0	0	60	0	0	0	0	0	0	0	0	0	Bacteria	Chloroflexi	Ktedonobacteria	Ktedonobacterales	Ktedonobacteraceae	FCPS473	NA	GATGTGCAGCGCCGCGGTAAGACGTAGGGAGCGAGCGTTGTCCGGAGTTACTGGGCGTAAAGGGCACGCAGGCGGTCGGTCGCGTTGCCACTGACAGCCGTCGGCTTAACTGACGGAGGTGGGGCAAAACGGGCCGACTTGAGGCTCAGAGAGGCAGACGGAATTCCGCGTGGAGCGGTGAAATGCGTAGAGATGCGGAAGAACACCAAAGGCGA
ASV_793	0	0	0	0	0	0	0	0	0	0	0	0	0	0	0	0	48	12	0	0	0	Bacteria	Planctomycetota	Planctomycetes	Gemmatales	Gemmataceae	NA	NA	ATGTGTCAGCGCCGCGGTAAGACGAACCGTGCGAACGTTGTTCGGAATCACTGGGCTTAAAGGGCGCGTAGGCGGTTCTCCCAGTCCGGGGTGAAAGCGCTCGGCTTAACCGGGCCAGTGCCTTGGATACTGGAGAACTCGAGGGAGATAGGGGCAGGTGGAACTTCCGGTGGAGCGGTGAAATGCGTTGATATCGGAAGGAACGCCGGTGGCGA
ASV_794	0	0	0	14	0	0	0	30	0	0	0	0	0	15	0	0	0	0	0	0	0	Bacteria	NA	NA	NA	NA	NA	NA	CGTTATCCGGAATTACTGGGCGTAAAGCGCGCGCAGGCGGACCGTCAAGTAGGGCGTGAAATCTCCCGGCCTAACTGGGAGGGGTCGTCCTAAACTAGCGGTCTTGAGGACGGCAGAGGTTGGTGGAATTCCTGGTGTAGTGGTGAAATGCGTAGAGATCAGGAGGAACACCGGTGGCGAAGGCGGCCAACTGGGCCGTCACTGACGCTGAGGCG
ASV_795	0	0	0	0	0	59	0	0	0	0	0	0	0	0	0	0	0	0	0	0	0	Bacteria	Cyanobacteria	Cyanobacteriia	Leptolyngbyales	Leptolyngbyaceae	Leptolyngbya PCC-6306	NA	GTGTCAGCGCCGCGGTAATACGGAGGATGCAAGCGTTATCCGGAATTATTGGGCGTAAAGCGTCCGTAGGTGGCGATACAAGTCTGTTGTTAAAGCGTGCGGCTCAACCGCATAAGGGCAATGGAAACTGTATGGCTAGAGTGCGATAGGGGTCACAGGAATTCCCAGTGTAGCGGTGAAATGCGTAGATATTGGGAAGAACACCAGCGGCGAAA
ASV_796	0	0	0	0	0	0	0	0	0	18	0	0	0	0	11	0	18	12	0	0	0	Bacteria	Planctomycetota	Planctomycetes	Isosphaerales	Isosphaeraceae	NA	NA	ATGTGCAGCGCCGCGGTAAGACGAACCGTGCGAACGTTATTCGGAATCACTGGGCTTAAAGCGCGTGTAGGCGGGTGGGCACGTCGGCCGCTGAAATCCCCCGGCTCAACCGGGGAACGGGCGCCGATACGACCCGCCTGGAGGGACGTAGGGGGACCTGGAACTTCCGGTGGAGCGGTGAAATGCGTTGAGATCGGAAGGAACGCCCGTGGCGA
ASV_797	0	0	0	0	0	0	0	0	0	0	0	0	0	0	0	0	0	35	0	0	24	Bacteria	Bacteroidota	Bacteroidia	Cytophagales	Cytophagaceae	Siphonobacter	NA	CGTTGTCCGGATTTATTGGGTTTAAAGGGTGCGCAGGCGGCTTGGTAAGTCCGTGGTGAAAGACGATCGCTTAACGATTGCAGTGCCATGGATACTGCCGGGCTTGAATCTCGTTGAGGCGGGTGGAATTGACCGTGTAGCGGTGAAATGCATAGATATGGTCAAGAACTCCAATTGCGAAGGCAGCCCGCTGGGCGAGGATTGACGCTCAGGCA
ASV_798	58	0	0	0	0	0	0	0	0	0	0	0	0	0	0	0	0	0	0	0	0	Bacteria	Chloroflexi	Ktedonobacteria	Ktedonobacterales	JG30-KF-AS9	NA	NA	TACGTAGGAGGCGAGCGTTGTCCGGAGTTACTGGGCGTAAAGGGTGCGTAGGCGGCCGCGCGCGTGGGGGGTGAAATCGCCCGGCTTACCTGGGCGGGGGCTTTCCAGACGGCGCGGCTTGAGGGACGGAGAGGGGCGTGGAATTCCGGGTGGAGCGGTGAAATGCGTAGAGATCCGGAGGAACACCGACGGCGAAGGCAGCGCCCTGGCCGTGCAATTGCCCTGACGCTGAAGCACGAAAGCTGG
ASV_799	0	0	0	0	0	0	0	0	0	0	58	0	0	0	0	0	0	0	0	0	0	Bacteria	Chloroflexi	Ktedonobacteria	Ktedonobacterales	Ktedonobacteraceae	1921-3	NA	CGTTGTCCGGAATTACTGGGCGTAAAGCGCACGCAGGTGGTGATGTTAGTGGAGGGTTACAGCTCCTGGCTTAACCAGGAGAGTGCCTGTCCAGACTGCATCGCTTGAGAGCGAGAGAGGGACATGGAATTCCAGGTGGAGCGGTGAAATGCGTAGAGATCTGGAGGAACACCAAAGGCGAAGGCAGTGTCCTGGCTCGTTTCTGACACTCCGGT
ASV_800	0	0	0	0	0	0	0	0	0	0	0	0	0	0	0	0	15	43	0	0	0	Bacteria	Proteobacteria	Alphaproteobacteria	Acetobacterales	Acetobacteraceae	Acidisoma	NA	CGTTGCTCGGAATGACTGGGCGTAAAGGGCGCGTAGGCGGTTTGGACAGTCGGGCGTGAAATTCCTGGGCTTAACCTGGGGGCTGCGCTCGATACATCTGGACTTGAGTGGGGAAGAGGGTTGTGGAATTCCCAGTGTAGAGGTGAAATTCGTAGATATTGGGAAGAACACCGGTGGCGAAGGCGGCAACCTGGTCCTTGACTGACGCTGAGGCG
ASV_801	0	0	9	0	0	0	0	0	0	0	0	0	0	0	48	0	0	0	0	0	0	Bacteria	Firmicutes	Sulfobacillia	Sulfobacillales	Sulfobacillaceae	NA	NA	CGTTGTCCGGAGTTACTGGGCGTAAAGGGCGTCTAGGCGGCTGGGTACGTCTTCAGTGAAATCCGCCGGCTCAACCGGTGGGGTGCTGGGGAAACGGCCGAGCTGGAGGGCAGGAGAGGGAAGCGGAATTCCCGGTGTAGCGGTGAAATGCGTAGAGATCGGGAGGAACACCCGTGGCGAAGGCGGCTTCCTGGACTGTCCCTGACGCTGAAGCG
ASV_802	0	0	0	0	33	0	0	0	14	0	0	0	0	0	0	0	10	0	0	0	0	Bacteria	Firmicutes	Bacilli	Alicyclobacillales	Alicyclobacillaceae	Effusibacillus	NA	CGTTGTCCGGAATCACTGGGCGTAAAGCGCGCGCAGGCGGTATCTCACGTCTGGGGTGAAAGCCCAGGGCTCAACCCTGGAACGGCCTTGGAAACGGAGGTACTTGAGCGTCGGAGAGGCAAGGGGAATTCCACGTGTAGCGGTGAAATGCGTAGAGATGTGGAGGAACACCAGTGGCGAAGGCGCCTTGCTGGCCGATTGCTGACGCTGAGGCG
ASV_803	0	0	0	0	28	0	0	0	0	0	0	0	15	0	0	0	0	14	0	0	0	Bacteria	Actinobacteriota	Acidimicrobiia	NA	NA	NA	NA	CGTTGTCCGGATTCATTGGGCGTAAAGAGCTCGTAGGCGGCTTGGTAAGTCAAATGTGAAACCTCCAGGCTCAACTTGGAGACGCCACTTGATACTGCCATGGCTAGAGTCCGGTAGGGGATCACGGAATTCCTGGTGTAGCGGTGAAATGCGCAGATATCAGGAGGAACACCGGTGGCGAAGGCGGTGGTCTGGGCCGGCACTGACGCTGAGGA
ASV_804	0	0	0	0	24	0	0	0	0	0	0	0	33	0	0	0	0	0	0	0	0	Bacteria	Chloroflexi	Chloroflexia	Elev-1554	NA	NA	NA	CGTTGTCCGGAATTACTGGGCGTAAAGAGCGCGTAGGCGGTTTGGTACATCTGCAGTGAAAGCCCTCGGCTCAACCGAGGGAGGTCTGCGGAGATGGCCAGACTGGAGGGCGGTAGAGGCAGGTGGAAGTCCCGAAGTAGTGGTGAAATGCGTAGAGATCGGGAGGAACACCCGTGGCGAAGGCGGCCTGCTGGGCCGCTCCTGACGCTGAGGCG
ASV_805	56	0	0	0	0	0	0	0	0	0	0	0	0	0	0	0	0	0	0	0	0	Bacteria	Planctomycetota	Planctomycetes	Isosphaerales	Isosphaeraceae	NA	NA	GACGAACCGTGCGAACGTTATTCGGAATCACTGGGCTTAAAGCGCGTGTAGGTGGCTCGGCACGTCTGTCGCTGAAATCTCCCGGCTCAACCGGGGAACTGGCGTGGATACGACCGGGCTTGAGGGATGTAGGGGGATCGGGAACTTCCGGTGGAGCGGTGAAATGCGTTGAGATCGGAAGGAACGCCCGTGGCGAAAGCGCGGTCCTGGACATTTCCTGACACTGAGACGCGAAAGCTAGGGGAG
ASV_806	0	56	0	0	0	0	0	0	0	0	0	0	0	0	0	0	0	0	0	0	0	Bacteria	Chloroflexi	AD3	NA	NA	NA	NA	TACGTAGGGGGCGAGCGTTATCCAGATTTACTGGGCGTAAAGCGCGTGTAGGCGGCTGGTTAAGTGTGATGTGAAATCCTCGGGCTCAACCCGAGAACTGCATTGCAAACTGGCCTGGCTAGAGTGCAGGAGAGGGAAGCGGAATTCCAGGTGTAGCGGTGAAATGCGTAGATATCTGGAGGAACACCAGTGGCGAAGGCGGCTTCCTGGCCTGTAACTGACGCTGAGACGCGAAAGCGTGGGGAG
ASV_807	0	0	21	0	0	0	0	0	0	0	0	0	0	0	6	0	0	0	29	0	0	Bacteria	Firmicutes	Symbiobacteriia	Symbiobacteriales	Caldinitratiruptor	NA	NA	CGTTGTCCGGAATGACTGGGCGTAAAGGGCGTGTAGGCGGCCCCTGAAGTTTGGAGTGAAATCCCCCGGCTCAACCGGGGGGGTGCTCCGGATACTGGGGGGCTTGAGTGGGCTAGAGGGCAGCGGAATTCCCGGTGTAGCGGTGAAATGCGTAGAGATCGGGAGGAACACCGGTGGCGAAGGCGGCTGCCTGGGGCCAGACTGACGCTGAGGCG
ASV_808	0	0	0	6	0	0	22	14	0	0	0	0	0	14	0	0	0	0	0	0	0	Bacteria	Proteobacteria	Alphaproteobacteria	Rhizobiales	Beijerinckiaceae	Methylovirgula	NA	CGTTGTTCGGATTTACTGGGCGTAAAGCGCACGTAGGCGGATTCTTAAGTCAGGGGTGAAATCCCGAGGCTCAACCTCGGAACTGCCTTTGATACTGGGGATCTCGAGTTCGGGAGAGGTGAGTGGAATTGCGAGTGTAGAGGTGAAATTCGTAGATATTCGCAAGAACACCAGTGGCGAAGGCGGCTCACTGGCCCGATACTGACGCTGAGGTG
ASV_809	0	0	0	0	30	0	0	0	0	0	26	0	0	0	0	0	0	0	0	0	0	Bacteria	Proteobacteria	Gammaproteobacteria	NA	NA	NA	NA	CGTTAATCGGAATTACTGGGCGTAAAGCGCACGTAGATGGCATCGTAAGTCGGATGTGAAATCCCCGGGCTCAACCTGGGAACGGCATTCGAAACTGCGTTGCTCGAATGTGGAAGAGGGAAGCGGAATTCCAGGTGTAGCGGTGAAATGCGTAGATATCTGGAGGAACATCAGTGGCGAAAGCGGCTTCCTGGTCCAACATTGACATTCAGGTG
ASV_811	0	0	0	0	27	0	0	0	12	17	0	0	0	0	0	0	0	0	0	0	0	Bacteria	Myxococcota	Myxococcia	Myxococcales	Anaeromyxobacteraceae	Anaeromyxobacter	NA	CGTTGTTCGGAATTATTGGGCGTAAAGCGCTTGTAGGCGGCTTGTTAAGTTCCGTGTGAAATCCCCAGGCTTAACCTGGGAAGTGCGCGGAAAACTGGCGAGCTTGAGTGCCGGAGAGGGTCGCGGAATTCCCGGTGTAGAGGTGAAATTCGTAGATATCGGGAGGAACACCAGTGGCGAAGGCGGCGACCTGGACGGACACTGACGCTGAGACG
ASV_812	0	0	0	0	35	0	0	0	0	0	20	0	0	0	0	0	0	0	0	0	0	Bacteria	Actinobacteriota	Acidimicrobiia	Microtrichales	NA	NA	NA	CGTTGTCCGGATTTATTGGGCGTAAAGAGCTCGTAGGCGGCTCGGTAAGTCAGGTGTGAAAACTCTAGGCTCAACCTAGAGACGCCACCTGATACTGCTGTGGCTAGAGTCCGGTAGGGGAGCATGGAATTCCTGGTGTAGCGGTGAAATGCGCAGATATCAGGAGGAACACCAGTGGCGAAGGCGGTGCTCTGGGCCGGAACTGACGCTGAGGA
ASV_813	0	0	0	0	0	0	0	0	55	0	0	0	0	0	0	0	0	0	0	0	0	Bacteria	Proteobacteria	Alphaproteobacteria	Rhizobiales	Xanthobacteraceae	NA	NA	CGTTGCTCGGAATCACTGGGCGTAAAGCGCACGTAGGCGGATTGTTAAGTCAGGGGTGAAATCCTGGAGCTCAACTCCAGAACTGCCTTTGATACTGGCGATCTCGAGTCCGGGAGAGGTGAGTGGAACTGCGAGTGTAGAGGTGAAATTCGTAGATATTCGCAAGAACACCAGTGGCGAAGGCGGCTCACTGGCCCGGTACTGACGCTGAGGTG
ASV_815	0	0	0	0	0	0	0	0	3	0	0	0	0	0	34	18	0	0	0	0	0	Bacteria	Chloroflexi	Ktedonobacteria	Ktedonobacterales	Ktedonobacteraceae	NA	NA	ATGTGTCAGCGCCGCGGTAATACGTAGGGGGCAAGCGTTGTCCGGAGTTATTGGGCGTAAAGCGCTCGCAGGCGGTCAGCCAAGTTCGGAGTGACAGTCCTCAGCTTAACTGAGGAAGGCCTTGGAAAACTGGTTGACTTGAGGGCTTCAGAGGGACACGGAATTCCGGGTGGAGTGGTGAAATGCGTAGAGATCCGGAAGAACACCAAAGGCGT
ASV_816	0	0	0	0	0	0	0	0	0	21	0	0	34	0	0	0	0	0	0	0	0	Bacteria	Actinobacteriota	Thermoleophilia	Gaiellales	NA	NA	NA	CGTTGTCCGGATTCATTGGGCGTAAAGAGCGTGTAGGCGGCCAGGTAGGTCCGCTGTGAAAACTCGAGGCTCAACCTCGAGATGTCGGCGGAAACCATCTGGCTAGAGTCCGGAAGAGGAGAGTGGAATTCCCGGTGTAGCGGTGAAATGCGCAGATATCGGGAAGAACACCCGTGGCGAAGGCGGCTCTCTGGGACGGTACTGACGCTGAGACG
ASV_817	0	0	0	0	0	0	0	0	0	0	0	0	0	0	0	55	0	0	0	0	0	Bacteria	Planctomycetota	Planctomycetes	Isosphaerales	Isosphaeraceae	NA	NA	CGTTATTCGGAATCACTGGGCTTAAAGCGCGTGTAGGCGCCCGGCACGTCGAGCGTTGAAAGCCCCCGGCTCAACCGGGGAAGCGGCCTCGATACGACCGGGCTGGAGGGGGGTAGGGGGAGCCGGAACTTCCGGTGGAGCGGTGAAATGCGTTGAGATCGGAAGGAACGCCCGCGGCGAAAGCGGGCTCCTGGACCCCGCCTGACGCTGAGACG
ASV_818	0	54	0	0	0	0	0	0	0	0	0	0	0	0	0	0	0	0	0	0	0	Bacteria	Acidobacteriota	Blastocatellia	Blastocatellales	Blastocatellaceae	NA	NA	TACGAGGGGAGCAAGCGTTGTTCGGATTTACTGGGCGTAAAGGGCGCGTAGGCGGCGTGACAAGTCACTTGTGAAATCTCCGGGCTTAACTCGGAGCGGTCAAGTGATACTGTCGTGCTAGAGTGCAGAAGGGGCAACTGGAATTCTTGGTGTAGCGGTGAAATGCGTAGATATCAAGAGGAACACCTGAGGCGAAGGCGGGTTGCTGGGCTGACACTGACGCTGAGGCGCGAAAGCTAGGGGAGC
ASV_819	0	54	0	0	0	0	0	0	0	0	0	0	0	0	0	0	0	0	0	0	0	Bacteria	Planctomycetota	Planctomycetes	Gemmatales	Gemmataceae	NA	NA	GACGAACCGTGCGAACGTTGTTCGGAATCACTGGGCTTAAAGGGCGCGTAGGCGGGAAACCAAGTCCGGGGTGAAATCTTTCGGCCCAACCGGAAAACGGCCTTGGATACTGGTTTCCTCGAGCGAGGTAGGGGCAGCTGGAACTTCCGGTGGAGCGGTGAAATGCGTTGATATCGGAAGGAACGCCGGTGGCGAAAGCGAGCTGCTGGACCTCTCCTGACGCTGAGGCGCGAAAGCCAGGGGAGC
ASV_820	0	0	0	0	4	0	0	0	8	0	0	0	5	0	0	0	22	0	0	0	15	Bacteria	Elusimicrobiota	Elusimicrobia	Lineage IV	NA	NA	NA	CGTTATTCGGAATACTAGGCGTAAAGCGAGTGTAGGCGGGTGCTTAAGTCTGCTGTGAAATCTCCAGGCTTAACTTGGAGCGGTCAGCGGATACTGGGCATCTTGAGTGTGGTAGGGGGCAGTGGAATTCCCGGTGTAGCGGTGAAATGCGTAGATATCGGGAGGAACACCTATGGCGAAAGCAGCTGCCTGGGCCATTACTGACGCTAAGACTC
ASV_821	0	0	0	0	0	0	0	0	12	20	22	0	0	0	0	0	0	0	0	0	0	Bacteria	Dependentiae	Babeliae	Babeliales	Vermiphilaceae	NA	NA	CGTTATTCGGAATTATTGGGCGTAAAGGGCGCGTAGACGGCATGTTAAGTCAACTGTTTAATTTCCCGGCCTAACCGGGAGACAGCGGTAGAAACTGGCGTGCTAGAGGGTGGAAGAGAGAAGTGGAATTCTCGGAGTAGCGGTAAAATGCGTAGATCTCGAGAGGAACACCAATGGCGAAGGCAGCTTCTTGGTCCATACCTGACGTTGAGGCG
ASV_822	0	0	0	0	0	0	0	0	0	6	0	0	0	0	0	0	17	31	0	0	0	Bacteria	Acidobacteriota	Acidobacteriae	Acidobacteriales	Koribacteraceae	Candidatus Koribacter	NA	ATGTGTCAGCGCCGCGGTAATACAGAGGGTGCAAGCGTTGTTCGGAATTATTGGGCGTAAAGGGCGCGTAGGCGGTGCGGTAAGTCTTCTGTGAAATCTCCGGGCTCAACTCGGAGCCTGCAGGGGAAACTGCCGTGCTGGAGTATGGGAGAGGTGAGTGGAATTCCCGGTGTAGCGGTGAAATGCGTAGATATCGGGAGGAACACCTGTGGCGA
ASV_823	0	0	0	0	0	0	0	0	0	0	0	0	0	0	0	0	0	0	54	0	0	Bacteria	Firmicutes	Clostridia	Peptostreptococcales-Tissierellales	Family XI	Peptoniphilus	NA	CGTTGTCCGGAATCACTGGGCGTAAAGGGTTCGCAGGCGGCCAGACAAGTCAGTTGTTAAAGGCTAAGGCTCAACCTTAGTAAGCATCTGAAACTGTTTGGCTTGAGTAGTGGATAGGCAAGTGGAATTCCTAGTGTAGCGGTGAAATGCGTAGATATTAGGAGGAATACCGGTGGCGAAGGCGACTTGCTGGACACAAACTGACGCTGAGGAAC
ASV_824	53	0	0	0	0	0	0	0	0	0	0	0	0	0	0	0	0	0	0	0	0	Bacteria	Acidobacteriota	Blastocatellia	Blastocatellales	Blastocatellaceae	Blastocatella	NA	TACGTAGGGACCAAGCGTTGTTCGGATTTACTGGGCGTAAAGGGAGCGTAGGCGGCAATTCAAGTCAGTTGTGAAATCTCCGAGCTTAACTCGGAACGGTCAACTGATACTGTTTTGCTAGAGTACAGAAGGGGCAATCGGAATTCTTGGTGTAGCGGTGAAATGCGTAGATATCAAGAGGAACACCTGAGGTGAAGACGGGTTGCTGGGCTGATACTGACGCTGAGGCTCGAAAGCTAGGGTAGC
ASV_825	53	0	0	0	0	0	0	0	0	0	0	0	0	0	0	0	0	0	0	0	0	Archaea	Crenarchaeota	Nitrososphaeria	Nitrososphaerales	Nitrososphaeraceae	Candidatus Nitrocosmicus	NA	TACCAGCACCCCGAGTGGTCGGGACGTTTATTGGGCCTAAAGCATCCGTAGCCGGTTCTACAAGTCTTCCGTTAAATCCAGCTGCTTAACAGATGGGCTGCGGAAGATACTATGGAGCTAGGAGGCGGGAGAGGCAAGCGGTACTCGATGGGTAGGGGTAAAATCCGTTGATCCATTGAAGACCACCAGTGGCGAAGGCGGCTTGCCAGAACGCGCTCGACGGTGAGGGATGAAAGCTGGGGGAGC
ASV_826	0	0	53	0	0	0	0	0	0	0	0	0	0	0	0	0	0	0	0	0	0	Bacteria	Armatimonadota	NA	NA	NA	NA	NA	CGTTGCCCGGATTTACTGGGCGTAAAGCGCACGTAGGCGGCTTCGTAAGTCTGGTGTGAAATCTCTCGGCTCAACCGAGAGGCTGCACCGGATACTGCGGAGCTCGAGGGCAGGAGAGGAGATTGGAATTCCCGGTGTAGCGGTGAAATGCATTGATATCGGGAGGAACACCAGTGGCGAAGGCGGATCTCTGGCCTGCATCTGACGCTGAGGTG
ASV_827	0	0	0	0	0	0	0	53	0	0	0	0	0	0	0	0	0	0	0	0	0	Bacteria	Chloroflexi	Chloroflexia	Elev-1554	NA	NA	NA	CGTTGTCCGGAATACTGGGCGTAAAGCGCGCGTAGGCGGTCTTTCGCGTAGGCGGTGAAAGCCCCCGGCTCACCTGGGGGAGGTCCGCCTAAACGGGGAGACTGGAGGGCGGTAGGGGCTGGCGGAACGCCCGGAGTAGCGGTGAAATGCGTTGAGATCGGGCAGAACACCAGTGGCGAAGGCGGCCGGCTGGGCCGACCCTGACGCTGAGGCGC
ASV_828	0	0	0	0	0	0	0	30	0	0	0	0	0	23	0	0	0	0	0	0	0	Bacteria	Chloroflexi	Ktedonobacteria	B12-WMSP1	NA	NA	NA	CGTTGTCCGGAATTACTGGGCGTAAAGAGCGCGTAGGCGGCGCCGTACGACAGCCGTGAAAGCCCCCGGCTCAACTGGGGAGGGTCGGTTGTAACGGCGGTGCTCTGAGTGCGGGAGAGGGAAGTGGAACTCCGGGAGTAGCGGTGAAATGCGTAGAGACCCGGAGGAACACCAGTGGCGAAGGCGGCTTCCTGGCCTGTAACTGACGCTGAGGC
ASV_829	0	0	0	0	0	0	0	0	13	0	0	0	0	0	0	0	0	0	0	0	40	Bacteria	Acidobacteriota	Acidobacteriae	Bryobacterales	Bryobacteraceae	Bryobacter	NA	CGTTGTTCGGAGTTACTGGGCGTAAAGAGTGCGTAGGTGGTGCCCTAAGTCTGTTGTGAAATCTCCCGGCTTAACTGGGAGGGTGCGGTGGAAACTGGGGTGCTTGAGTGTGGGAGAGGTAAGCGGAATTCCTGGTGTAGCGGTGAAATGCGTAGATATCAGGAGGAACACCGGTGGTGTAGACGGCTTACTGGACCACGACTGACACTGAGGCA
ASV_830	0	0	0	0	0	0	0	0	0	53	0	0	0	0	0	0	0	0	0	0	0	Bacteria	Proteobacteria	Alphaproteobacteria	Rhizobiales	Beijerinckiaceae	Methylovirgula	NA	ATGTGTCAGCGCCGCGGTAATACGAAGGGGGCTAGCGTTGTTCGGAATCACTGGGCGTAAAGCGCACGTAGGCGGATTCTTAAGTCAGGGGTGAAATCCCGAGGCTCAACCTCGGAACTGCCTTTGATACTGGGGATCTCGAGTCCGGGAGAGGTGAGTGGAATTGCGAGTGTAGAGGTGAAATTCGTAGATATTCGCAAGAACACCAGTGGCGA
ASV_831	0	0	0	0	32	0	0	0	0	0	13	0	0	0	0	0	0	0	0	7	0	Bacteria	Verrucomicrobiota	Chlamydiae	Chlamydiales	Parachlamydiaceae	Neochlamydia	NA	CATTAATCGGATTTATTGGGCGTAAAGGGCGCGTAGGCGGGCATGTAAGTCAGATGTGAAATCCCGGAGCTCAACTCCGGAATAGCATTTGAAACTGCGTGTCTAGAGGGTAGACGGAGAAAATAGAATTCCACAAGTAGCGGTGAAATGCGTAGATATGTGGAAGAATACCAGTGGCGAAGGCGATTTTCTAGTTTATACCTGACGCTGAGGCG
ASV_832	0	0	0	0	14	0	0	0	0	0	14	0	0	0	0	0	0	0	24	0	0	Bacteria	Planctomycetota	Planctomycetes	Gemmatales	Gemmataceae	NA	NA	CGTTGTTCGGAATCACTGGGTTTAAAGGGCGCGTAGGCGGACTGTCAAGTCGGTGGTGAAATCTTTCGGCTCAACCGGAAAATCGCCTTCGATACTGGCGGCCTTGAGGGAGGTAGGGGCATGCGGAACTTCCGGTGGAGCGGTGAAATGCGTAGATATCGGAAGGAACACCGATGGCGAAAGCAGCGTGCTGGACCTTTTCTAACGCTGAGGCG
ASV_833	0	0	0	0	0	36	16	0	0	0	0	0	0	0	0	0	0	0	0	0	0	Bacteria	Planctomycetota	Planctomycetes	Gemmatales	Gemmataceae	NA	NA	CGTTGTTCGGAATCACTGGGCTTAAAGGGCGCGTAGGCGGGTCAGCCAGTTCGGGGTGAAATCCTTCGGCTTAACCGGAGAACTGCCTCGAAGACGACTGATCTGGAGGGAGGTAGGGGTCGCTGGAACTTCCGGTGGAGCGGTGAAATGCGTTGATATCGGAAGGAACGCCGGTGGCGAAAGCGAGCGACTGGACCTTTACTGACGCTGAGGCG
ASV_835	0	0	0	0	0	0	0	0	0	0	0	0	0	0	0	0	0	0	0	0	52	Bacteria	Actinobacteriota	Thermoleophilia	Gaiellales	NA	NA	NA	CGTTGTCCGGATTTATTGGGCGTAAAGAGCGTGTAGGCGGTTAGGTAGGTCCGTTGTGAAAACTCGAGGCTCAACCTCGAGACGCCGATGGAAACCATCTGACTAGAGTCCGGAAGAGGAGAGTGGAATTCCTGGTGTAGCGGTGAAATGCGCAGATATCAGGAAGAACACCCGTGGCTAAGGCGGCTCTCTAGTACGGTACTGACGCTGAGACG
ASV_836	0	51	0	0	0	0	0	0	0	0	0	0	0	0	0	0	0	0	0	0	0	Bacteria	Acidobacteriota	Acidobacteriae	Subgroup 2	NA	NA	NA	GACGTAGGGGGCCAGCGTTGTTCGGAATTACTGGGTGTAAAGGGTTCGTAGGCGGTGCGGCAAGTTGGGAGTGAAATCTCTGGGCTTAACCCAGAGGCTGCTTCCAAAACTGCTGTGCTTGAGTGTGGGAGAGGCGCGTGGAATTGCAGGTGTAGCGGTGAAATGCGTAGATATCTGCAGGAACACCCGTGGCGAAAGCGGCGCGCTGGACCACAACTGACGCTGAGGAACGAAAGCTAGGGGAGC
ASV_837	0	0	0	24	0	0	0	0	0	0	0	0	0	27	0	0	0	0	0	0	0	Bacteria	Proteobacteria	Gammaproteobacteria	Gammaproteobacteria Incertae Sedis	Unknown Family	Acidibacter	NA	CGTTAATCGGAATTACTGGGCGTAAAGCGTGCGTAGACGGTAATGTAAGTCGGGTGTGAAAGCCCCGGGCTCAACCTGGGAATTGCACTCGAGACTGCATTGCTCGGGTGCGGAAGAGGGAAGCGGAATTTCCGGTGTAGCGGTGAAATGCGTAGATATCGGAAGGAACACCAGTGGCGAAAGCGGCTTCCTGGTCCGACACCGACGTTCAGCAC
ASV_838	0	0	0	0	0	0	51	0	0	0	0	0	0	0	0	0	0	0	0	0	0	Archaea	Crenarchaeota	Nitrososphaeria	SCGC AB-179-E04	NA	NA	NA	ATGTGCAGCGCCGCGGTAATACCAGCTCCCCGAGTGGTCGGGACGATTATTGGGCCTAAAGCATCCGTAGCCGGCTTCACAGGTCTCTTGTTAAATCCAACGGCTCAACCGTTGGACCGCAGGAGATACCATGGAGCTAGGGGGCGGGAGAGGCGGACGGTACTCCATGGGTAGGGGTAAAATCCTTTGATCCATGGAAGACCACCAGTGGCGAA
ASV_839	0	0	0	0	0	0	0	0	0	0	0	51	0	0	0	0	0	0	0	0	0	Bacteria	Chloroflexi	Ktedonobacteria	Ktedonobacterales	Ktedonobacteraceae	FCPS473	NA	CGTTGTCCGGAGTTACTGGGCGTAAAGGGCACGCAGGCGTCGGTCGCGTTGCCACTGACAGCCGTCGGCTTAACTGACGGAGGTGGGGCAAAACGGGCCGACTTGAGGCTCAGAGAGGCAGACGGAATTCCGCGTGGAGCGGTGAAATGCGTAGAGATGCGGAAGAACACCAGAGGCGAAGGCGCTCTGCTGGCGATGCTCTGACGCTCATGGAC
ASV_840	0	50	0	0	0	0	0	0	0	0	0	0	0	0	0	0	0	0	0	0	0	Bacteria	Planctomycetota	Planctomycetes	Gemmatales	Gemmataceae	NA	NA	GACGAACCGTGCGAACGTTGTTCGGAATCACTGGGCTTAAAGGGCGCGTAGGCGGACCGTTTAGTCCGGGGTGAAAGCCCCCAGCTCAACTGGGGAATAGCCTCGGATACTGGCGGTCTCGAGGGAGGTAGGGGCAGCTGGAACTTCCGGTGGAGCGGTGAAATGCGTTGATATCGGAAGGAACGCCTGTGGCGAAAGCGAGCTGCTGGGCCTTTTCTGACGCTGAGGCGCGAAAGCCAGGGGAGC
ASV_841	0	0	0	0	0	0	0	0	0	0	0	0	0	0	0	0	18	32	0	0	0	Bacteria	Acidobacteriota	Acidobacteriae	Solibacterales	Solibacteraceae	Candidatus Solibacter	NA	CGTTGTTCGGAGTTACTGGGCGTAAAGGGTGTGTAGGCGGTCCCCTAAGTTTGGTGTGAAATCTCCCGGCTCAACCGGGAGGGTGCGCCGAAGACTGGGGGGCTAGAGTGCGGGAGAGGAGAGTGGAATTCCTGGTGTAGCGGTGAAATGCGTAGATATCAGGAGGAACACCGGCGGTGTAGACGGCTCTCTGGACCGTAACTGACGCTGAGACA
ASV_842	0	49	0	0	0	0	0	0	0	0	0	0	0	0	0	0	0	0	0	0	0	Bacteria	Proteobacteria	Alphaproteobacteria	Rhizobiales	Hyphomicrobiaceae	Pedomicrobium	NA	TACGAAGGGAGCTAGCGTTGTTCGGAATCACTGGGCGTAAAGCGCACGTAGGCGGATGTGTCAGTCAGGGGTGAAATCCCGGAGCTCAACTTCGGAACTGCCTTTGATACAGCACGTCTTGAGTCCGATAGAGGTGGGTGGAATTCCTAGTGTAGAGGTGAAATTCGTAGATATTAGGAAGAACACCGGTGGCGAAGGCGGCCCACTGGATCGGTACTGACGCTGAGGTGCGAAAGCGTGGGGAGC
ASV_843	0	49	0	0	0	0	0	0	0	0	0	0	0	0	0	0	0	0	0	0	0	Bacteria	Proteobacteria	Alphaproteobacteria	Rhizobiales	Xanthobacteraceae	NA	NA	TACGAAGGGGGCTAGCGTTGCTCGGAATCACTGGGCGTAAAGCGCACGTAGGCGGATTGTTAAGTCAGGGGTGAAATCCTGGAGCTCAACTCCAGAACTGCCTTTGATACTGGCGATCTCGAGTCCGGGAGAGGTGAGTGGAACTGCGAGTGTAGAGGTGAAATTCGTAGATATTCGCAAGAACACCAGTGGCGAAGGCGGCTCACTGGCCCGGTACTGACGCTGAGGTGCGAAAGCGTGGGGAGC
ASV_844	0	0	0	0	18	0	0	0	7	0	0	0	24	0	0	0	0	0	0	0	0	Bacteria	Chloroflexi	Ktedonobacteria	B12-WMSP1	NA	NA	NA	CGTTGTCCGGAATTACTGGGCGTAAAGAGCGCGTAGGCGGCGCCATAAGTTCCGTGTGAAAGCCCCCGGCTCAACTGGGGAGGGTCGCGGAAGACTGTGGTGCTGGAGTGTCGGAGAGGGAAGTGGAAGTCCCGGAGTAGGGGTGAAATCCGTAGATACCGGGCCGAACACCAGTGGCGAAGGCGACTTCCTGGCCGACGACTGACGCTGAGGCG
ASV_845	0	0	0	0	0	0	0	0	0	0	27	0	0	0	0	0	7	11	4	0	0	Bacteria	Proteobacteria	Alphaproteobacteria	Reyranellales	Reyranellaceae	Reyranella	NA	CGTTGTTCGGAATTACTGGGCGTAAAGCGAGTGTAGGTGGTTTTCCAAGTTGGATGTGAAAGCCTTGAGCTCAACTCAAGAAATGCATTCAGGACTGGAAGACTAGAGGACCGGAGAGGATAGTGGAATTCCCAGTGTAGTGGTGAAATACGTAGAGATTGGGAAGAACACCAGTGGCGAAGGCGGCTATCTGGACGGTTTCTGACACTAAGACT
ASV_846	0	0	0	0	0	0	0	0	0	0	0	0	0	0	0	0	13	36	0	0	0	Bacteria	Chloroflexi	SHA-26	NA	NA	NA	NA	CGTTGTCCGGATTTACTGGGCGTAAAGGGCGCGTAGGTGGTTGGGTAGGTTGGTGGTGAAAGGTTGGGGCTTAACCCCAAGAGGTCCACCAAGACCGCTCGACTGCGAGGGCAGTAGAGGAAGGTAGAATTCCGGGTGTAGTGGTGAAATGCGTAGAGATCCGGAGGAATACCGGTGGCGAAGGCGGCCTTCTGGGCTGTCCCTGACACTGAGGC
ASV_847	0	0	0	0	0	0	0	0	0	0	0	0	0	49	0	0	0	0	0	0	0	Bacteria	Proteobacteria	Gammaproteobacteria	Xanthomonadales	Rhodanobacteraceae	Mizugakiibacter	NA	TGTGCAGCGCCGCGGTAATACGGAGGGTGCAAGCGTTAATCGGAATTACTGGGCGTAAAGCGTGCGTAGGTGGTTCGTTAAGTCCGTTGTGAAAGCCCCGAGCTCAACTTGGGAATTGCAGTGGATACTGATGAGCTGGAGTGCGGTAGAGGAAGGTGGAATTCCCGGTGTAGCGGTGAAATGCGTAGAGATCGGGAGGAACACCAGTGGCGAAG
ASV_848	48	0	0	0	0	0	0	0	0	0	0	0	0	0	0	0	0	0	0	0	0	Bacteria	Proteobacteria	Alphaproteobacteria	Rhizobiales	Xanthobacteraceae	Pseudolabrys	NA	TACGAAGGGGGCTAGCGTTGCTCGGAATTACTGGGCGTAAAGCGCACGTAGGCGGCTTCTTAAGTCGGAGGTGAAATCCTGGAGCTCAACTCCAGAACTGCCTTCGATACTGGGAAGCTTGAGTTCGGGAGAGGTGAGTGGAACTGCGAGTGTAGAGGTGAAATTCGTAGATATTCGCAAGAACACCAGTGGCGAAGGCGGCTCACTGGCCCGATACTGACGCTGAGGTGCGAAAGCGTGGGGAGC
ASV_849	0	0	0	0	24	0	0	0	0	0	0	0	24	0	0	0	0	0	0	0	0	Bacteria	Chloroflexi	Ktedonobacteria	Ktedonobacterales	Ktedonobacteraceae	JG30a-KF-32	NA	TGTGCAGCGCCGCGGTAATACGTAGGGGGCGAGCGTTGTCCGGATTTATTGGGCGTAAAGGGCACGCAGGCGGTCGTGTAAGTTTGGGGTGACAGCTGTCGGCTTCACCGAGAGAGTGTCCCAAAGACTGCAGGACTTGAGGGCCAACGAGGAACACAGAATTCCGGGTGTAGTGGTGAAATGCGTAGATATCCGGAGGAATACCAACGGCGAAG
ASV_850	0	0	0	0	0	0	48	0	0	0	0	0	0	0	0	0	0	0	0	0	0	Bacteria	Actinobacteriota	Actinobacteria	Pseudonocardiales	Pseudonocardiaceae	Pseudonocardia	NA	CGTTGTCCGGAATTATTGGGCGTAAAGAGCTCGTAGGCGGTCTGTCGCGTCGGTCGTGAAAACTTGGGGCTTAACCCTGAGCTTGCGGTCGATACGGGCATGACTGGAGTTCGGCAGGGGAGACTGGAATTCCTGGTGTAGCGGTGAAATGCGCAGATATCAGGAGGAACACCGGTGGCGAAGGCGGGTCTCTGGGCCGATACTGACGCTGAGGA
ASV_851	0	0	0	0	0	0	0	0	0	0	0	0	0	0	19	14	0	0	15	0	0	Bacteria	WPS-2	NA	NA	NA	NA	NA	CGTTGTTCGGAATTACTGGGCGTAAAGGGTGCGTAGGCGGGTCTGTAAGTCGAGGTTGAAATATCCGGGCTCAACTCGGGGCACGGCCTCGATACTGCAGATCTCGAGTCAAGAAGAGGGTAGTGGAATTCCCGGTGTAGCGGTGAAATGCGTAGATATCGGGAGGAACACCAGTGGCGAAGGCGGCTACCTGGTCTTGTACTAACGCTGATGCA
ASV_852	0	0	0	0	0	0	0	0	0	0	0	0	0	0	2	9	0	37	0	0	0	Bacteria	Myxococcota	Myxococcia	Myxococcales	Myxococcaceae	NA	NA	CGTTGTTCGGAATTATTGGGCGTAAAGCGCGTGTAGGCGGCTTTGCAAGTCGGGTGTGAAAGCCCTCAGCTCAACTGAGGAAGTGCGCCCGAAACTGCATGGCTTGAGTACCGGAGAGGATGGCGGAATTCCCGAAGTAGAGGTGAAATTCGTAGATATCGGGAGGAACACCGGTGGCGAAGGCGGCCATCTGGACGGATACTGACGCTGAGACG
ASV_853	0	0	0	0	0	0	0	0	0	0	0	0	0	0	0	19	0	29	0	0	0	Bacteria	Chloroflexi	AD3	NA	NA	NA	NA	ATGTGCAGCGCCGCGGTAATACGTAGGGGGCGAGCGTTATCCAGATTTACTGGGCGTAAAGCGCGTGTAGGCGGCTGGTTAAGTGTGATGTGAAATCCTCGGGCTCAACCCGAGAACTGCATTGCAAACTGGCCTGGCTAGAGTGCAGGAGAGGGAAGCGGAATTCCAGGTGTAGCGGTGAAATGCGTAGATATCTGGAGGAACACCAGTGGCGA
ASV_854	0	0	0	0	0	0	0	0	0	0	0	0	11	0	0	0	0	0	37	0	0	Bacteria	Firmicutes	Bacilli	Lactobacillales	Streptococcaceae	Streptococcus	NA	CGTTGTCCGGATTTATTGGGCGTAAAGCGAGCGCAGGCGGTTAGATAAGTCTGAAGTTAAAGGCTGTGGCTTAACCATAGTACGCTTTGGAAACTGTTTAACTTGAGTGCAAGAGGGGAGAGTGGAATTCCATGTGTAGCGGTGAAATGCGTAGATATATGGAGGAACACCGGTGGCGAAAGCGGCTCTCTGGCTTGTAACTGACGCTGAGGCTC
ASV_855	0	0	0	0	0	0	0	0	0	0	0	0	0	0	0	0	0	0	0	0	48	Bacteria	Armatimonadota	Chthonomonadetes	Chthonomonadales	Chthonomonadaceae	Chthonomonas	NA	CGTTGTCCGAAGTACTGGGCGTAAAGCGCGCGTAGGCGGGTGGGTAAGTCTGCTGTGAAAGCCCGAGGCTCAACCTCGGAGGGTCGGTGGATACTGCTCATCTTGAAGGGGCTAGGGGGAGATGGAATTACCGGTGTAGCGGTGAAATGCGTAGATATCGGTAGGAACACCAGTGGCGAAGGCGGTCTCCTGGGGTCCTCTTGACGCTGAGGCGC
ASV_856	0	0	0	0	0	0	0	0	0	0	0	0	0	48	0	0	0	0	0	0	0	Bacteria	Proteobacteria	Alphaproteobacteria	NA	NA	NA	NA	CGTTGTTCGGAATGACTGGGCGTAAAGGGCGCGTAGGTGGTGTTGCAAGTCTTGTGTGAAAGCCCCGGGCTTAACCTGGGAACTGCACAGGAGACTGCAACGCTAGAGTACAGAAGGGGAAAGTGGAATTGCGCGTGGAGAGGTGAAATTCGTAGAGATGCGCAAGAACACCAATGGCGAAGGCATCTTTCTGGTCTGTAACTGACACTGAGGCG
ASV_857	47	0	0	0	0	0	0	0	0	0	0	0	0	0	0	0	0	0	0	0	0	Bacteria	Chloroflexi	NA	NA	NA	NA	NA	GACGGAGGGGGCAAGCGTTGTCCGGATTTACTGGGCGTAAAGCGCGCGTAGGCGGTCGGGCGCGTCGGTGGTGAAAGGTCTCGGCTCAACCGAGACAGGTCTGCCGAGACGGTCCGACTGGAGGGCGGTAGAGGCCGGTGGAATTCCCGGTGTAGTGGTGAAATGCGTAGAGATCGGGAGGAACACCAGTGGCGAAGGCGGCCGGCTGGGCCGTCCCTGACGCTGAGGCGCGAAAGCGTGGGGAGC
ASV_858	0	0	26	0	0	0	0	0	0	0	0	0	0	0	0	0	0	0	0	21	0	Bacteria	Proteobacteria	Alphaproteobacteria	Rhizobiales	Beijerinckiaceae	Bosea	NA	CGTTGCTCGGAATCACTGGGCGTAAAGGGCGCGTAGGCGGACTTTTAAGTCGGGGGTGAAAGCCCAGGGCTCAACCCTGGAATTGCCTTCGATACTGAGAGTCTTGAGTTCGGAAGAGGTTGGTGGAACTGCGAGTGTAGAGGTGAAATTCGTAGATATTCGCAAGAACACCAGTGGCGAAGGCGGCCAACTGGTCCGATACTGACGCTGAGGCG
ASV_861	0	0	0	0	0	0	0	0	0	0	0	28	0	19	0	0	0	0	0	0	0	Bacteria	Proteobacteria	Alphaproteobacteria	Holosporales	Holosporaceae	NA	NA	CGTTGTTCGGAATGACTGGGTGTAAAGGGCGCGTAGGTGGTATTTTAAGTGAGGCGTGAAAGCCCTGGGCTTAACCCAGGAGGTGCGTTTCATACTGGAATGCTAGAGTGCGAGAGAGGAAAGTGGAATTCCTAGTGTAGAGGTGAAATTCGTAGATATTAGGAAGAACACCAGAGGCGAAGGCGGCTTTCTGGCTCGTAACTGACACTGAGGCG
ASV_862	0	0	0	0	0	0	0	0	0	0	0	0	0	0	0	0	0	0	0	26	21	Bacteria	Proteobacteria	Alphaproteobacteria	Sphingomonadales	Sphingomonadaceae	Sphingomonas	NA	CGTTGTTCGGAATTACTGGGCGTAAAGCGCACGTAGGCGGCTTTGTAAGTTAGAGGTGAAAGCCCGGAGCTCAACTCCGGAATTGCCTTTAAGACTGCATCGCTAGAACGTCGGAGAGGTGAGTGGAATTCCGAGTGTAGAGGTGAAATTCGTAGATATTCGGAAGAACACCAGTGGCGAAGGCGACTCACTGGACGACTGTTGACGCTGAGGTG
ASV_863	0	46	0	0	0	0	0	0	0	0	0	0	0	0	0	0	0	0	0	0	0	Bacteria	Planctomycetota	Pla4 lineage	NA	NA	NA	NA	TACGGAGAGTGCAAACGTTGTTCGGATTCACTGGGCGTAAAGGGCACGTAGGCGGCTCGGCAAATCGGTCGTGGAATCTCGACGCTTACCGTCGAAACGGCGGCCGAAAATACCGGGCTAGAGGGCGTGAGAGGTCACTGGAACTCCTGGTGAAGCGGTGAAATGCGTAGATATCAGGAGGAACGCCGGAGGCGAAAGCGAGTGACTGGCGCGTTCCTGACGCTGAGGTGCGAAAGCTAGGGGAGC
ASV_864	0	46	0	0	0	0	0	0	0	0	0	0	0	0	0	0	0	0	0	0	0	Bacteria	Acidobacteriota	Acidobacteriae	Bryobacterales	Bryobacteraceae	Bryobacter	NA	TACGTAGGCAGCAAGCGTTGTTCGGAGTTACTGGGCGTAAAGAGTGCGTAGGCGGTTTCGTAAGTTTGGTGTGAAATCTCCCGGCTTAACTGGGAGGGTGCGCCGAAAACTGCGGGGCTGGAGTGTGGGAGAGGTAAGCGGAATTCCCGGTGTAGCGGTGAAATGCGTAGATATCGGGAGGAACACCAGCGGTGTAGACGGCTTACTGGACCATGACTGACGCTGAGGCACGAAAGCGTGGGGAGC
ASV_865	0	46	0	0	0	0	0	0	0	0	0	0	0	0	0	0	0	0	0	0	0	Bacteria	NA	NA	NA	NA	NA	NA	TACGTAGGGTGCAAGCGTTATCCAGATTTACTGGGCGTAAAGCGCGCGCAGGCGGATGATTAAGTCAGCTGTGAAAGCCCCCGGCTCAACTGGGGAGAGTCGGCTGAAACTGATCGTCTTGAGGGCAGCAGAGGAGTGTGGAATTGCGGGTGTAGTGGTGAAATGCGTAGATATCCGCAGGAACACCGGTGGCGAAGGCGGCACTCTGGGCTGAACCTGACGCTGAGGCGCGAAGGCTAGGGGAGC
ASV_866	0	0	0	3	0	0	0	17	0	0	0	0	0	26	0	0	0	0	0	0	0	Bacteria	Proteobacteria	Gammaproteobacteria	Gammaproteobacteria Incertae Sedis	Unknown Family	Candidatus Ovatusbacter	NA	CGTTAATCGAAATTACTGGGCGTAAAGGGTGCGTAGGTGGTTTGATAAGTTAGATGTGAAAGTCCTGGGCTCAACCTGGGGACTGCGTCTGATACTGTCAGGCTAGAGTTCTGTAGAGGAAGGTGGAATTTCCGGAGTAGCGGTGAAATGCGTAGATATCGGAAGGAACATCGGTGGCGAAGGCGGCCTTCTGGACAGGAACTGACACTGAGGCA
ASV_867	0	0	0	20	0	0	12	0	0	0	0	0	0	14	0	0	0	0	0	0	0	Bacteria	Proteobacteria	Alphaproteobacteria	Acetobacterales	Acetobacteraceae	Acidiphilium	NA	CGTTGCTCGGAATGACTGGGCGTAAAGGGCGCGTAGGCGGCCTGGACAGTCGGATGTGAAATTCCTGGGCTCAACCTGGGGGCTGCATCCGAGACGTCTGGGCTGGAGTGGGGAAGAGGGTCGTGGAATTCCCAGTGTAGAGGTGAAATTCGTAGATATTGGGAAGAACACCGGTGGCGAAGGCGGCGACCTGGTCCTTGACTGACGCTGAGGCG
ASV_868	0	0	0	14	0	0	0	15	0	0	0	9	0	8	0	0	0	0	0	0	0	Bacteria	Proteobacteria	Gammaproteobacteria	Xanthomonadales	Rhodanobacteraceae	Chujaibacter	NA	CGTTAATCGGAATTACTGGGCGTAAAGCGTGCGCAGGCGGTTTGTTAAGTCCGTTGTGAAAGCCCCGAGCTCAACTTGGGAATTGCAGTGGATACTGGCAGGCTGGAGTACGGTAGAGGAAGGTGGAATTCCCGGTGTAGCAGTGAAATGCGTAGATATCGGGAGGAACACCAGTGGCGAAGGCGGCCTTCTGGACCAGTACTGACGCTCTGCAC
ASV_869	0	0	0	0	39	0	0	0	0	0	0	0	7	0	0	0	0	0	0	0	0	Bacteria	Gemmatimonadota	Gemmatimonadetes	Gemmatimonadales	Gemmatimonadaceae	Gemmatimonas	NA	CGTTGTCCGGAATCATTGGGCGTAAAGGGCGCGTAGGTGGCGGGACAAGCGTGCGGTGAAAGCTCGGGGCTCAACCCCGCGTCGGCCGTGCGAACTGTTTTGCTTGAGCACTGTAGAGGCAGGCGGAATTCCGGGTGTAGCGGTGGAATGCGTAGAGATCCGGAAGAACACCGGTGGCGAAGGCGGCCTGCTGGGCAGTAGCTGACACTGAGGCG
ASV_870	0	0	0	0	13	0	0	0	0	0	25	0	8	0	0	0	0	0	0	0	0	Bacteria	Planctomycetota	Planctomycetes	Gemmatales	Gemmataceae	NA	NA	CGTTATTCGGAATCACTGGGCTTAAAGGGTGCGTAGGCGGGCGCGCGAGTCAGGGGTGAAATCCCACGGCCCAACCGTGGAAGTGCCTCTGATACCGCGGGCCTAGAGGGGGACAGGGGCATGCGGAACTTCCGGTGGAGCGGTGAAATGCGTAGATATCGGAAGGAACACCGGTGGCGAAAGCGGCGTGCTGGATCCCTACTGACGCTGAGGCA
ASV_871	0	0	0	0	10	0	0	0	0	30	6	0	0	0	0	0	0	0	0	0	0	Bacteria	Myxococcota	Myxococcia	Myxococcales	Myxococcaceae	KD3-10	NA	CGTTGTTCGGAATTATTGGGCGTAAAGGGAGTGTAGGCGGCTTTGCAAGTCTTCTGTGAAATCTACGGGCTTAACCCGTCAAAGTGCAGAAGATACTGCTTAGCTTGAGTGTCAGAGAGGGTGGCGGAATTCCCGGTGTAGAGGTGAAATTCGTAGAGATCGGGAGGAACACCAGTGGCGAAGGCGGCCACCTGGCTGACAACTGACGCTGAGAC
ASV_872	0	0	0	0	32	0	0	0	0	0	0	0	14	0	0	0	0	0	0	0	0	Bacteria	Planctomycetota	Planctomycetes	Gemmatales	Gemmataceae	NA	NA	CGTTGTTCGGATTCACTGGGCTTAAAGGGCGCGTAGGCGGGCGGTCAAGTCAGGGGTGAAATCTTTCGGCTCAACCGGAAAAGTGCCTCTGATACTGATCGTCTCGAGGGAGGTAGGGGCATGTGGAACTTCCGGTGGAGCGGTGAAATGCGTAGATATCGGAAGGAACGCCGGTGGCGAAAGCGACGTGCTGGACCTCTTCTGACGCTGAGGCG
ASV_873	0	0	0	0	46	0	0	0	0	0	0	0	0	0	0	0	0	0	0	0	0	Bacteria	Myxococcota	Polyangia	NA	NA	NA	NA	CGTTGCTCGGAATCATTGGGCGTAAAGCGCACGTAGGCGGCTTGTTAAGTCGGGTGTGAAATCCCTGGGCTCAACCCAGGAAGTGCACTCGAAACTGGCGAGCTTGAATATGGAAGAGGGTCGCGGAATTCCCGGTGTAGAGGTGAAATTCGTAGATATCGGGAGGAACACCAGTGGCGAAGGCGGCGACCTGGGCCAATATTGACGCTGAGGTG
ASV_874	0	0	0	0	46	0	0	0	0	0	0	0	0	0	0	0	0	0	0	0	0	Bacteria	Actinobacteriota	Thermoleophilia	Solirubrobacterales	Solirubrobacteraceae	Conexibacter	NA	CGTTGTCCGGAATCATTGGGCGTAAAGAGCGTGTAGGCGCCGATCAGTCCGCTGTAAAAGTCCAGGGCTCAACCCTGGGAGGCCGGTGGATACTGTCGGGCTAGAGTCCGGAAGAGGCGAGTGGAATTCCTGGTGTAGCGGTGAAATGCGCAGATATCAGGAGGAACACCAATGGCGAAGGCAGCTCGCTGGGACGGTACTGACGCTGAGACGCG
ASV_875	0	0	0	0	0	0	0	0	0	0	0	0	0	0	0	0	0	0	0	46	0	Bacteria	Acidobacteriota	Blastocatellia	Blastocatellales	Blastocatellaceae	NA	NA	CGTTGTTCGGATTTACTGGGCGTAAAGGGCGTGTAGGCGGCGCGGTAAGTCACTTGTGAAATCTCTGAGCTTAACTCAGAACGGCCAAGTGATACTGCTGTGCTAGAGTGCGGAAGAGGCAACCGGAATTCTTGGTGTAGCGGTGAAATGCGTAGATATCAAGAGGAACACCTGAGGCGAAGGCGGGTTGCTGGGCCGACACTGACGCTGATGCG
ASV_876	0	0	0	0	0	0	0	0	0	0	0	0	46	0	0	0	0	0	0	0	0	Bacteria	Planctomycetota	Planctomycetes	Gemmatales	Gemmataceae	NA	NA	CGTTGTTCGGAATCACTGGGCTTAAAGGGCGCGTAGGCGGGCCGACAAGTCCGGGGTGAAAGCCCCCGGCTCAACCGGGGAAGCGCCTTGGATACTGTCGGTCTCGAGGGGGGTAGGGGCGTGCGGAACTTCCGGTGGAGCGGTGAAATGCGTAGATATCGGAAGGAACACCGGTGGCGAAAGCGGCGCGCTGGACCCCTTCTGACGCTGAGGCG
ASV_877	45	0	0	0	0	0	0	0	0	0	0	0	0	0	0	0	0	0	0	0	0	Bacteria	Bacteroidota	Bacteroidia	Chitinophagales	Chitinophagaceae	NA	NA	TACGGAGGGTGCAAGCGTTATCCGGATTCACTGGGTTTAAAGGGTGCGTAGGTGGGCAGGTAAGTCAGTGGTGAAATCTCCGAGCTTAACTCGGAAACTGCCGTTGATACTATTTGTCTTGAATATTGTGGAGGTAAGCGGAATATGTCATGTAGCGGTGAAATGCTTAGATATGACATAGAACACCAATTGCGAAGGCAGCTTACTACACAACGATTGACGCTGAGGCACGAAAGCGTGGGGATC
ASV_878	0	0	0	0	38	0	0	0	0	0	0	0	7	0	0	0	0	0	0	0	0	Bacteria	Verrucomicrobiota	Verrucomicrobiae	Chthoniobacterales	Chthoniobacteraceae	Candidatus Udaeobacter	NA	CGTTGTTCGGATTCATTGGGCGTAAAGGGTGCGTAGGTGGCGGGGTAAGTCAGGTGTGAAATTTCGGAGCTTAACTCCGAAACTGCATTTGATACTGCCTTGCTTGAGGACTGGAGAGGAGACTGGAATTTACGGTGTAGCAGTGAAATGCGTAGAGATCGTAAGGAAGACCAGTGGCGAAGGCGGGTCTCTGGACAGTTCCTGACACTGAGGCA
ASV_879	0	0	0	0	0	45	0	0	0	0	0	0	0	0	0	0	0	0	0	0	0	Archaea	Crenarchaeota	Nitrososphaeria	Nitrososphaerales	Nitrososphaeraceae	Candidatus Nitrososphaera	NA	GTGTCAGCGCCGCGGTAATACCAGCACCCCGAGTGGTCGGGACGATTATTGGGCCTAAAGCATCCGTAGCCTGTCCTGCAAGTCTTCCGTTAAATCCACCTGCTTAACAGATGGGCCGCGGAGGATACTACAGGGCTAGGAGGCGGGAGAGGCAAACGGTACTCAGTGGGTAGGGGTAAAATCCACTGATCCACTGAAGACCACCAGTGGCGAAG
ASV_880	0	0	0	0	0	12	0	0	0	33	0	0	0	0	0	0	0	0	0	0	0	Bacteria	Proteobacteria	Alphaproteobacteria	Rhizobiales	Hyphomicrobiaceae	Hyphomicrobium	NA	CGTTGTTCGGAATCACTGGGCGTAAAGCGCACGTAGGCGGATTTGTAAGTCAGGGGTGAAATCCCGGGGCTCAACCTCGGAACTGCCTTTGATACTGCGGATCTTGAGTCCGATAGAGGTGGGTGGAATTCCTAGTGTAGAGGTGAAATTCGTAGATATTAGGAAGAACACCGGTGGCGAAGGCGGCCCACTGGATCGGTACTGACGCTGAGGTG
ASV_881	0	0	0	0	0	0	20	25	0	0	0	0	0	0	0	0	0	0	0	0	0	Bacteria	Chloroflexi	Ktedonobacteria	Ktedonobacterales	Ktedonobacteraceae	JG30a-KF-32	NA	CGTTGTCCGGAGTACTGGGCGTAAAGCGCACGCAGGCGGTCGTGTAAGTTTGGGGTGACAGCTGTCGGCTTAACCGGCAGAGTGCCTCAAAGACTGCAGGACTTGAGGGCCAAAGAGGGACATGGAACTCCAGGTGTAGTGGTGAAATGCGTAGATATCTGGAAGAACACCAAAGGCGAAGGCAGTGTCCTGGTTGGTACCTGACGCTCAGGTGC
ASV_882	0	0	0	0	0	0	0	29	0	0	0	0	0	16	0	0	0	0	0	0	0	Bacteria	Planctomycetota	Planctomycetes	Gemmatales	Gemmataceae	NA	NA	CGTTGTTCGGATTCACTGGGCTTAAAGGGCGCGTAGGCGGGCGGTCAAGTCGGGGGTGAAATCTTTCAGCTTAACTGGAAAAGTGCCTCCGATACTGATTGTCTTGAGGGAGGTAGGGGCATGTGGAACTTCCGGTGGAGCGGTGAAATGCGTAGATATCGGAAGGAACGCCGGTGGCGAAAGCGACGTGCTGGACCTCTTCTGACGCTGAGGCG
ASV_883	0	0	0	0	0	0	0	0	45	0	0	0	0	0	0	0	0	0	0	0	0	Bacteria	Cyanobacteria	Cyanobacteriia	Cyanobacteriales	Nostocaceae	Nostoc PCC-73102	NA	CGTTATCCGGAATGATTGGGCGTAAAGCGTCCGCAGGTGGCAATGTAAGTCTGCTGTTAAAGAGTCTAGCTCAACTAGATAAAAGCAGTGGAAACTACATAGCTAGAGTACGTTCGGGGCAGAGGGAATTCCTGGTGTAGCGGTGAAATGCGTAGAGATCAGGAAGAACACCGGTGGCGAAGGCGCTCTGCTAGGCCGTAACTGACACTGAGGAC
ASV_884	0	0	0	0	0	0	0	0	0	0	0	45	0	0	0	0	0	0	0	0	0	Bacteria	Chloroflexi	AD3	NA	NA	NA	NA	GATGTGCAGCGCCGCGGTAATACGTAGGGGGCGAGCGTTACCCGGATTCACTGGGCGTAAAGCGCGTGTAGGCGGCTGGTCAAGCGTGGTGTGAAATCTCCGGGCTCAACCCGGAAACTGCACTGCGAACTGGCCTGGCTGGAGTGCAGGAGAGGGCAGCGGAATTCCCGGTGTAGCGGTGAAATGCGTAGATATCGGGAGGAACACCGGTGGCG
ASV_886	0	0	0	0	0	0	0	0	0	0	0	0	45	0	0	0	0	0	0	0	0	Bacteria	Proteobacteria	Alphaproteobacteria	Rhizobiales	Xanthobacteraceae	NA	NA	CGTTGCTCGGAATCACTGGGCGTAAAGCGCACGTAGGCGGTTTGCTAAGTCAGGGGTGAAATCCTGGAGCTCAACTCCAGAACTGCCTTTGATACTGGCGAGCTTGAGTCCGGGAGAGGTGAGTGGAACTGCGAGTGTAGAGGTGAAATTCGTAGATATTCGCAAGAACACCAGTGGCGAAGGCGGCTCACTGGCCCGGTACTGACGCTGAGGTG
ASV_887	0	0	0	0	0	0	0	0	0	0	0	0	0	45	0	0	0	0	0	0	0	Bacteria	GAL15	NA	NA	NA	NA	NA	CGTTGTCCGGATTTACTGGGCGTAAAGCGCGTGCAGGCGGTCGGCTAAGTCCCGTGTTAAAGCCTCCGGCCCAACCGGAGAACGCCGCGGGATACTGGCGGACTTGAGGATGGTAGAGGGCGATGGAATTCCCGGTGTAGCGGTGAAATGCGTAGATATCGGGAGGAACGCCAGTGGCGAAGGCGGTCGCCTGGGCCATTCCTGACGCTGAGACG
ASV_888	44	0	0	0	0	0	0	0	0	0	0	0	0	0	0	0	0	0	0	0	0	Bacteria	Acidobacteriota	Acidobacteriae	NA	NA	NA	NA	TACGTAGGCAGCAAGCGTTGTTCGGAGTTACTGGGCGTAAAGAGTGTGTAGGCGGCGGGCCGCGTCTGGTGTGAAATCTCCCGGCTTAACCGGGAGGGTGCGCCGGAAACGGGCCGGCTTGGAGTATGGGAGAGGGAAGCGGAATTCCTGGTGTAGCGGTGAAATGCGTAGATATCAGGAGGAACACCGGTGGTGTAGACGGCTTCCTGGACCATGACTGACGCTGAGACACGAAAGCGTGGGGAG
ASV_889	0	0	10	0	0	31	0	0	0	0	0	0	0	0	0	0	0	0	0	0	3	Bacteria	Proteobacteria	Alphaproteobacteria	Acetobacterales	Acetobacteraceae	Rhodovarius	NA	CGTTGCTCGGAATTACTGGGCGTAAAGGGCGCGTAGGCGGCCCGGCAAGTCAGGCGTGAAATTCCTGGGCTCAACCTGGGGGCTGCGCTTGAGACTGCGGGGCTGGAGGCCGAGAGAGGGTGGTGGAATTCCCAGTGTAGAGGTGAAATTCGTAGATATTGGGAAGAACACCGGTGGCGAAGGCGGCCACCTGGCTCGGACCTGACGCTGAGGCG
ASV_890	0	0	0	0	13	0	0	0	0	0	0	0	31	0	0	0	0	0	0	0	0	Bacteria	Planctomycetota	Planctomycetes	Gemmatales	Gemmataceae	NA	NA	CGTTGTTCGGAATCACTGGGCTTAAAGGGCGCGTAGGCGGCTCGCAAAGTCAAGGGTGAAATCTTTCGGCTCAACCGGAAAAGTGCCTTTGATACTGGCGGGCTTGAGGGAGGTAGGGGCATGTGGAACTTCCGGTGGAGCGGTGAAATGCGTTGATATCGGAAGGAACGCCGGTGGCGAAAGCGACGTGCTGGACCTCTTCTGACGCTGAGGCG
ASV_891	0	0	0	0	0	44	0	0	0	0	0	0	0	0	0	0	0	0	0	0	0	Bacteria	Proteobacteria	Gammaproteobacteria	Xanthomonadales	Rhodanobacteraceae	Mizugakiibacter	NA	GTGTCAGCGCCGCGGTAATACGGAGGGTGCAAGCGTTAATCGGAATTACTGGGCGTAAAGCGTGCGTAGGTGGTTCGTTAAGTCCGTTGTGAAAGCCCCGAGCTCAACTTGGGAATTGCAGTGGATACTGATGAGCTGGAGTGCGGTAGAGGAAGGTGGAATTCCCGGTGTAGCGGTGAAATGCGTAGAGATCGGGAGGAACACCAGTGGCGAAG
ASV_892	0	0	0	0	0	0	0	0	20	9	0	0	0	0	0	0	0	0	0	0	15	Bacteria	Bdellovibrionota	Oligoflexia	0319-6G20	NA	NA	NA	CGTTGTTCGGAATCATTGGGCGTAAAGCGCGTGTAGGCTGTTAATTAAGTCGGGTGTGAAATCCCTGGGCTCAACCGAGGAAGTGCATCCGAAACTAATTAGCTAGAGAATGGTAGAGGAAGGTGGAATTCCTAGTGTAGAGGTGAAATTCGTAGATATTAGGAGGAATACCGGTGGCGAAGGCGGCCTTCTGGACCATTTCTGACGCTGAGACG
ASV_893	0	0	0	0	0	0	0	0	0	18	0	0	0	0	0	0	0	26	0	0	0	Bacteria	Actinobacteriota	Actinobacteria	Frankiales	Frankiaceae	Jatrophihabitans	NA	CGTTGTCCGGAATTATTGGGCGTAAAGAGCTCGTAGGCGGTTTGTCACGTCGGCTGTGAAAACCTGGGGCTCAACCCCGGGCCTGCAGCCGATACGGGCAAGCTAGAGTTCGGCAGGGGAGACTGGAATTCCTGGTGTAGCGGTGAAATGCGCAGATATCAGGAGGAACACCGGTGGCGAAGGCGGGTCTCTGGGCCGATACTGACGCTGAGGAG
ASV_894	0	0	0	43	0	0	0	0	0	0	0	0	0	0	0	0	0	0	0	0	0	Bacteria	Proteobacteria	Gammaproteobacteria	Burkholderiales	Oxalobacteraceae	Noviherbaspirillum	NA	CGTTAATCGGAATTACTGGGCGTAAAGCGTGCGCAGGCGGTTGTGCAAGACCGATGTGAAATCCCCGGGCTTAACCTGGGAATGGCATTGGTGACTGTACGGCTAGAGTGTGTCAGAGGGGGGTAGAATTCCACGTGTAGCAGTGAAATGCGTAGAGATGTGGAGGAATACCGATGGCGAAGGCAGCCCCCTGGGATGACACTGACGCTCATGCA
ASV_896	0	0	0	43	0	0	0	0	0	0	0	0	0	0	0	0	0	0	0	0	0	Bacteria	Proteobacteria	Gammaproteobacteria	Xanthomonadales	Rhodanobacteraceae	Mizugakiibacter	NA	TGTGTCAGCGCCGCGGTAATACGGAGGGTGCAAGCGTTAATCGGAATTACTGGGCGTAAAGCGTGCGTAGGTGGTTCGTTAAGTCCGTTGTGAAAGCCCCGAGCTCAACTTGGGAATTGCAGTGGATACTGATGAGCTGGAGTGCGGTAGAGGAAGGTGGAATTCCCGGTGTAGCGGTGAAATGCGTAGAGATCGGGAGGAACACCAGTGGCGAA
ASV_897	0	0	0	0	38	0	0	0	5	0	0	0	0	0	0	0	0	0	0	0	0	Bacteria	Armatimonadota	NA	NA	NA	NA	NA	CGTTGTCCGGAATTACTGGGCGTAAAGGGCGCGTAGGCGGCCGTTTAAGTCCGCTGTGAAAGACCGAGGCTCAACCTCGGGGTGTCAGCGGAGACTGGACGGCTAGGGTGTCGGAGAGGAGCGCGGAATCCCTGGTGTAGCGGTGGAATGCGTAGAGATCAGGGGGAACACCGATGGCGAAGGCAGTGCTCTGGCCGAAGACCGACGCTGAGGCG
ASV_898	0	0	0	0	0	20	0	0	0	0	0	23	0	0	0	0	0	0	0	0	0	Bacteria	Bacteroidota	Kryptonia	Kryptoniales	BSV26	NA	NA	CGTTGTCCGGAATTACTGGGTGTAAAGGGCGTGTAGGTGGGTCTCTAAGTCGGGGGTGAAATCCTACAGCTTAACTGTAGAATTGCTTCCGATACTGGAGATCTTGAGTGCGGCAGAGGGAGATGGAATTCATGGTGTAGCGGTGAATGATGTAGATATCATGAAGAACACCAGTAGCGAAGGCGGTCTCCTGGTCCGTAACTGACACTGAGGCG
ASV_900	0	0	0	0	0	0	0	0	7	0	0	0	0	0	0	0	21	15	0	0	0	Bacteria	RCP2-54	NA	NA	NA	NA	NA	CGTTGTTCGGATTGACTGGGCGTAAAGGGCGTGTAGGCGGTTGGTCAAGTCTGGTGTGAAAGCCCGGGGCTCAACTCCGGAAGTGCATTGGAAACTAGCCAGCTAGAGCGCGAGAGAGGAGGGTGGAATTCCTGGTGTAGCGGTGAAATGCGTAGATATCAGGAGGAACACCGGCGGCGAAGGCGGCCCTCTGGCTCGTTGCTGACGCTGAAACG
ASV_901	0	0	0	0	0	0	0	0	10	0	33	0	0	0	0	0	0	0	0	0	0	Bacteria	Planctomycetota	Planctomycetes	Gemmatales	Gemmataceae	NA	NA	CGTTGTTCGGAATCACTGGGCTTAAAGGGCGCGTAGGCGGTCAATCAAGTCCGGGGTGAAATCTTTCGGCTTAACCGGAAAAGGGCCTTGGATACTGATTGGCTGGAGGGAGGTAGGGGCAGCTGGAACTTCCGGTGAAGCGGTGAAATGCGTTGATATCGGAAGGAACGCCGGTGGCGAAAGCGAGCTGCTGGACCTTTTTCTGACGCTGAGGC
ASV_902	0	0	0	0	0	0	0	0	0	0	43	0	0	0	0	0	0	0	0	0	0	Bacteria	Chloroflexi	Ktedonobacteria	Ktedonobacterales	Ktedonobacteraceae	1921-2	NA	CGTTGTCCGGAGTTACTGGGCGTAAAGGGCACGCAGGCGGTCTGCCACGTTTGCCATGACAGGGTCGGGCTTCACTCGACCAGGAGGGCAAAAACGAGCGGACTTGAGGCTTGGAGAGGGACCTGGAATTCCGGGTGGAGTGGTGAAATGCGTAGAGATCCGGAGGAACACCGAAGGCGAAGGCAGGGTCCTGGCCAAGAACTGACGCTGAGGTG
ASV_903	0	0	0	0	0	0	0	0	0	0	0	0	0	0	0	24	0	0	0	0	19	Bacteria	Bacteroidota	Bacteroidia	Chitinophagales	Chitinophagaceae	NA	NA	CGTTATCCGGATTCACTGGGTTTAAAGGGTGCGTAGGCGGGCAGGAAAGTCCGTGGTGAAATCTCTGAGCTTAACTCAGAAACTGCCATGGATACTATTTGTCTTGAATACTGTGGAGGTGAGCGGAATATGTCATGTAGCGGTGAAATGCTTAGATATGACATAGAACACCAATTGCGAAGGCAGCTCACTACACAATTATTGACGCTGAGGCA
ASV_904	0	42	0	0	0	0	0	0	0	0	0	0	0	0	0	0	0	0	0	0	0	Bacteria	Armatimonadota	NA	NA	NA	NA	NA	TACGTAGGGGGCGAGCGTTGTCCGGATTTACTGGGCGTAAAGCGCGTGTAGGCGGCGATTTAAGTCGGGTGTGAAAGCCCGGGGCTCAACCCCGGAGTGCCGCCCGAGACTGGGTCGCTTGAGGACGGAAGAGGGGCGTGGAATTCCTGGTGTAGCGGTGAAATGCGTAGAGATCAGGAGGAACACCCGTGGCGAAGGCGGCGCCCTGGTCCGTTACTGACGCTGAGACGCGAAAGCGCGGGGAGC
ASV_905	0	42	0	0	0	0	0	0	0	0	0	0	0	0	0	0	0	0	0	0	0	Bacteria	GAL15	NA	NA	NA	NA	NA	GACGTAGGGGGCGAGCGTTGTCCGGAATTACTGGGCGTAAAGCGCGTGCAGGCGGCCTGGTCAGTCCCGTGTGAAAGCCTACGGCTCAACTGTAGGAGGCCGCGGGATACTGCCGGGCTCGAGGGCAGGAGAGGGAAGTGGAATTCCCGGTGTAGCGGTGAAATGCGTAGATATCGGGAGGAACGCCAGTGGCGAAGGCGGCTTCCTGGCCTGTCCCTGACGCTGAGACGCGAAAGCTGGGGGAGC
ASV_906	0	42	0	0	0	0	0	0	0	0	0	0	0	0	0	0	0	0	0	0	0	Bacteria	Actinobacteriota	Acidimicrobiia	IMCC26256	NA	NA	NA	TACGTAGGGGGCGAGCGTTGTCCGGATTCATTGGGCGTAAAGAGCTCGTAGGCGGTTTGGTGAGTCGGGTGTGAAATCTCCACGCTCAACGTGGAGGGGCCACCCGATACTGCCATGACTCGAGTCCGGTAGAGGAGTGTGGAATTCCCGGTGTAGCGGTGAAATGCGCAGATATCGGGAGGAACACCCGTAGCGAAGGCGGCACTCTGGGCCGGTACTGACGCTGAGGAGCGAAAGCGTGGGGAG
ASV_907	0	0	11	0	0	0	7	0	0	0	0	0	0	0	2	2	0	0	9	0	11	Bacteria	Chloroflexi	NA	NA	NA	NA	NA	CGTTGTCCGGATTTATTGGGCGTAAAGCGCGCGCAGGCGGTGCGGTAAGGCGGCCGTGAAATCGCCCGGCTCAACTGGGCGGGGGCGGTGGCGACTGCCGCACTGGAGGCACTCAGAGGCTGGTGGAATTCCCGGTGGAGTGGTGAAATGCGTAGAGATCGGGAGGAACACCCGTGGCGAAGGCGGCCAGCTGGGGGTGGCCTGACGCTGAGGCG
ASV_908	0	0	0	42	0	0	0	0	0	0	0	0	0	0	0	0	0	0	0	0	0	Bacteria	Actinobacteriota	Acidimicrobiia	NA	NA	NA	NA	CGTTGTCCGGATTTATTGGGCGTAAAGAGCTCGTAGGCGGCTTGGTAAGTTAGATGTGAAATCTCCAGGCTCAACCTGGAGCCGCCATTCGATACTGCCATGGCTAGAGTTTGGTAGGGGACCACGGAATTCCTGGTGTAGCGGTGAAATGCGCAGATATCAGGAGGAACACCAGCGGCGAAGGCGGTGGTCTGGGCCAATACTGACGCTGAGGA
ASV_909	0	0	0	0	26	0	0	0	0	0	0	0	0	0	0	6	0	10	0	0	0	Bacteria	Planctomycetota	BD7-11	NA	NA	NA	NA	CGTTGTTCGGAATCACTGGGCATAAAGCGCACGTAGGCGGCGGCGTAAGTCGGATGTGAAATCCCTCGGCCCAACCGAGGAACTGCGTCCGATACTGCGTTGCTTGAGGACCAAAGGGGTGCATGGAATTCCCGGTGGAGCGGTGAAATGCGTTGATATCGGGAGGAACGCCGGCGGCGAAAGCGGTGCACTGGTTGGTTTCTGACGCTGAGGTG
ASV_910	0	0	0	0	0	42	0	0	0	0	0	0	0	0	0	0	0	0	0	0	0	Bacteria	Deinococcota	Deinococci	Thermales	Thermaceae	Meiothermus	NA	GTGTCAGCGCCGCGGTAATACGGAGGGTGCGAGCGTTACCCGGATTTACTGGGTGTAAAGGGCGTGTAGGCGGATACTCAAGTCCGGTGCTAAAGACTGGGGCTCAACCCCAGGAGTGCGCTGGATACTGGGTGTCTAGACGGTCGGAGAGGGCAGCGGAATTCTCGGAGTAGCGGTGAAATGCGCAGATACCGAGAGGAACGCCGATAGCGAAA
ASV_911	0	0	0	0	0	42	0	0	0	0	0	0	0	0	0	0	0	0	0	0	0	Bacteria	Chloroflexi	NA	NA	NA	NA	NA	GTGTCAGCGCCGCGGTAATACGTAGGTGGCAAGCGTTGTCCGGATTTACTGGGCGTAAAGAGCGCGCAGGCGGTCGGCCAAGTCGAGTGTGAAAGCCCCCGGCTCAACTGGGGAGGGTCACTCGATACTGGTCGACTCGAAGGCGGGAGAGGGAAGCGGAATTCCCGGTGTAGCGGTGAAATGCGTAGATATCGGGAGGAACACCAGTGGCGAAG
ASV_912	0	0	0	0	0	0	0	30	0	0	0	0	0	12	0	0	0	0	0	0	0	Bacteria	Planctomycetota	Planctomycetes	Isosphaerales	Isosphaeraceae	Tundrisphaera	NA	CGTTATTCGGAATCACTGGGCTTAAAGCGCGTGTAGGCGGCCGCCACGTCAGTCGCTGAAATCCCCCGGCTCAACCGGGGAAGTGGCACTGATACGAGCGGCCTGGAGGGAGGTAGGGGGGGCTGGAACTTCCGGTGGAGCGGTGAAATGCGTTGAGATCGGAAGGAACGCCCGTGGCGAAAGCGAGCCCCTGGACCTTTTCTGACGCTGAGACG
ASV_913	0	0	0	0	0	0	0	0	35	0	0	0	4	0	0	3	0	0	0	0	0	Bacteria	Verrucomicrobiota	Verrucomicrobiae	Chthoniobacterales	Chthoniobacteraceae	Candidatus Udaeobacter	NA	CGTTGTTCGGATTCATTGGGCGTAAAGGGTGCGTAGGCGGCGCGGTAAGTCGGGTGTGAAATCTCGGAGCTTAACTCCGAAACTGCATTCGATACTGCCGCGCTCGAGGACTGGAGAGGAGACTGGAATTCACGGTGTAGCGGTGAAATGCGTAGATATCGTGAGGAAGACCAGTGGCGAAGGCGGGTCTCTGGACAGTTCCTGACGCTGAGGCA
ASV_914	0	0	0	0	0	0	0	0	0	0	0	0	0	0	42	0	0	0	0	0	0	Bacteria	Actinobacteriota	Acidimicrobiia	NA	NA	NA	NA	CGTTGTCCGGAATTATTGGGCGTAAAGAGCTCGTAGGCGGCTTGGCAAGTCGGGTGTGAAAATCCAGGCTCAACCTGGAGACGCCACCCGATACTGCCATGGCTGGAGTCCGGTAGGGGATCACGGAATTCCTGGTGTAGCGGTGAAATGCGCAGATATCAGGAGGAACACCAGTGGCGAAGGCGGTGATCTGGGCCGGTACTGACGCTGAGGAG
ASV_915	0	0	0	0	0	0	0	0	0	0	0	0	0	0	21	21	0	0	0	0	0	Bacteria	Actinobacteriota	Thermoleophilia	Solirubrobacterales	Solirubrobacteraceae	NA	NA	CGTTGTCCGGAATCATTGGGCGTAAAGAGCGTGTAGGCGGCCCGATAAGTCCGCTGTGAAAGTCCAGGGCTCAACCCTGGAAAGCCGGTGGATACTGTCGGGCTAGAGTCCGGAAGGGGCGAGTGGAATTCCTGGTGTAGCGGTGAAATGCGCAGATATCAGGAGGAACACCAATGGCGAAGGCAGCTCGCTGGGACGGTACTGACGCTGAGACG
ASV_916	0	0	0	0	0	0	0	0	0	0	0	0	42	0	0	0	0	0	0	0	0	Bacteria	Chloroflexi	KD4-96	NA	NA	NA	NA	CGTTGTCCGGATTTACTGGGCGTAAAGAGCGCGCAGGCGGTCGTTCAAGTCGAGTGTGAAAGCCCCCGGCTCAACTGGGGAGGGTCACTCGATACTGATCGACTCGAAGGCAGGAGAGGGAAGTGGAATTCCCGGTGTAGTGGTGAAATGCGTAGATATCGGGAGGAACACCAGTGGCGAAGGCGACTTCCTGGCCTGTTCTTGACGCTGAGGCG
ASV_917	0	41	0	0	0	0	0	0	0	0	0	0	0	0	0	0	0	0	0	0	0	Bacteria	Proteobacteria	Alphaproteobacteria	Rhizobiales	Xanthobacteraceae	NA	NA	TACGAAGGGGGCTAGCGTTGCTCGGAATCACTGGGCGTAAAGCGCACGTAGGCGGACTCTTAAGTCGGGGGTGAAATCCTGGAGCTCAACTCCAGAACTGCCTTCGATACTGGGAGTCTTGAGTTCGGGAGAGGTGAGTGGAACTGCGAGTGTAGAGGTGAAATTCGTAGATATTCGCAAGAACACCAGTGGCGAAGGCGGCTCACTGGCCCGATACTGACGCTGAGGTGCGAAAGCGTGGGGAGC
ASV_918	0	0	0	0	34	0	0	0	0	0	7	0	0	0	0	0	0	0	0	0	0	Bacteria	Proteobacteria	Alphaproteobacteria	Sphingomonadales	Sphingomonadaceae	Plot4-2H12	NA	CGTTGTTCGGAATTACTGGGCGTAAAGCGCACGTAGGCGGCTTTGTAAGTTAGAGGTGAAAGCCCGGGGCTCAACCCCGGAATAGCCTTTAAGACTGCATCGCTTGAACACGGGAGAGGTGAGTGGAATTCCGAGTGTAGAGGTGAAATTCGTAGATATTCGGAAGAACACCAGTGGCGAAGGCGGCTCACTGGACCGTTGTTGACGCTGAGGTG
ASV_919	0	0	0	0	0	0	0	26	0	0	0	0	0	15	0	0	0	0	0	0	0	Bacteria	Actinobacteriota	Acidimicrobiia	NA	NA	NA	NA	CGTTGTCCGGATTTATTGGGCGTAAAGAGCTCGTAGGCGGTTCGATAAGTCGGGTGTGAAATCTCCAGGCTCAACCTGGAGTCGCCACTCGATACTGTCGTGACTCGAGTCCGGTAGGGGACCATGGAATTCCTGGTGTAGCGGTGAAATGCGCAGATATCAGGAGGAACACCAGTAGCGAAGGCGGTGGTCTGGGCCGGCACTGACGCTGAGGA
ASV_920	0	0	0	0	0	0	0	0	0	41	0	0	0	0	0	0	0	0	0	0	0	Bacteria	GAL15	NA	NA	NA	NA	NA	ATGTGTCAGCGCCGCGGTAAGACGTAGGGGGCGAGCGTTGTCCGGATTTACTGGGCGTAAAGCGCGTGCAGGCGGTCGGCTAAGTCCCGTGTTAAAGCCTCCGGCCCAACCGGAGAACGCCGCGGGATACTGGCGGGCTTGAGGATGGTAGAGGGCGATGGAATTCCCGGTGTAGCGGTGAAATGCGTAGATATCGGGAGGAACGCCAGTGGCGA
ASV_921	0	0	0	0	0	0	0	0	0	0	0	0	0	0	14	0	0	0	0	27	0	Bacteria	Actinobacteriota	Thermoleophilia	Solirubrobacterales	Solirubrobacteraceae	Conexibacter	NA	CGTTGTCCGGAATCATTGGGCGTAAAGAGCGTGTAGGCGGCTCAGTAAGTCCGCTGTGAAAATCAGGGCTCAACCCTGGAATGCCGGTGGAAACTGCCGAGCTCGAGTCCGGAAGAGGCGAGTGGAATTCCCGGTGTAGCGGTGAAATGCGCAGATATCGGGAGGAACACCAATGGCGAAGGCAGCTCGCTGGGACGGTACTGACGCTGAGACGC
ASV_922	0	0	0	0	0	0	0	0	0	0	0	0	0	0	0	0	0	41	0	0	0	Bacteria	Myxococcota	Polyangia	Polyangiales	Polyangiaceae	Pajaroellobacter	NA	CGTTGTTCGGAATTACTGGGCGTAAAGCGTGTGTAGGCGGCTACGTAAGTCGGATGTGAAAGCCCCGGGCTCAACCCGGGAAGTGCACTCGATACTGCGTAGCTTGAGTATCGGAGAGGTTGGTGGAATTCTCGGTGTAGAGGTGAAATTCGTAGATATCGAGAGGAACACCGGTGGCGAAGGCGGCCAACTGGACGAATACTGACGCTGAGACA
ASV_923	0	0	0	0	0	0	0	0	0	0	0	0	0	0	0	0	0	7	0	0	34	Bacteria	Proteobacteria	Alphaproteobacteria	Acetobacterales	Acetobacteraceae	Acidiphilium	NA	CGTTGCTCGGAATGACTGGGCGTAAAGGGCGCGTAGGCGGATTGATTAGTCAGGCGTGAAATTCCCGGGCTTAACCTGGGGGCTGCGTTTGATACGGTTGGTCTAGAGTTTGGAAGAGGGTCGTGGAATTCCCAGTGTAGAGGTGAAATTCGTAGATATTGGGAAGAACACCGGTGGCGAAGGCGGCGACCTGGTCCTTGACTGACGCTGAGGCG
ASV_924	0	0	0	0	0	0	0	0	0	0	0	0	0	41	0	0	0	0	0	0	0	Bacteria	Firmicutes	NA	NA	NA	NA	NA	CGTTGTCCGGAATTACTGGGCGTAAAGGGCGTCTAGGCGGCCTGATACGTCGGCAGTGAAAGACTCCAGCTCAACTGGGGCATTGCTGCCGAAACGGCCAGGCTTGAGGGCAGGAGAGGGAAGCGGAATTGCCGGTGTAGCGGTGAAATGCGTAGAGATCGGCAGGAACACCAGTGGCGAAGGCGGCTTCCTGGACTGCCCCTGACGCTGAAGCG
ASV_925	0	40	0	0	0	0	0	0	0	0	0	0	0	0	0	0	0	0	0	0	0	Bacteria	Chloroflexi	Anaerolineae	NA	NA	NA	NA	TACGTAGGAGGCGAGCGTTATCCGGAATTACTGGGCGTAAAGCGCGCGCAGGCGGCCGCGTGCAGTTGGGCGTAAAAGCTCCCGGCTCAACTGGGAGTAGTCGTTCAAGACGGCGGGGCTAGAGGGTCGGAGAGGCCGGTGGAATTCCCGGTGTAGTGGTGAAATGCGTAGAGATCGGGAGGAACACCAGTGGCGGAAGCGGCCGGCTGGTCGGCACCTGACGCTGAGGCGCGAAAGCACGGGGAG
ASV_926	0	40	0	0	0	0	0	0	0	0	0	0	0	0	0	0	0	0	0	0	0	Bacteria	WPS-2	NA	NA	NA	NA	NA	GACGTAGGGGGCAAGCGTTGTTCGGAATTATTGGGCGTAAAGCGCTCGTAGGCGGGACAGGTAGTCCGTGAAGAAAGACCTCGGCTCAACTGAGGGAACGGCACGGATACTCTTGTTCTTGAGGCAATCAGAGGGTGATGGAATTCCCGGTGTAGCGGTGAAATGCGTAGATATCGGGAGGAACACCAGTGGCGAAGGCGATCACCTGGGGTTGTTCTGACGCTGAGGAGCGAAAGCTAGGGGAGC
ASV_927	0	0	40	0	0	0	0	0	0	0	0	0	0	0	0	0	0	0	0	0	0	Archaea	Crenarchaeota	Nitrososphaeria	Nitrososphaerales	Nitrososphaeraceae	Candidatus Nitrososphaera	NA	TGTGTCAGCCGCCGCGTAATACCAGCACCCCGAGTGGTCGGGACGATTATTGGGCCTAAAGCATCCGTAGCCTGTCCTGCAAGTCTTCCGTTAAATCCACCTGCTTAACAGATGGGCCGCGGAGGATACTACAGGGCTAGGAGGCGGGAGAGGCAAACGGTACTCAGTGGGTAGGGGTAAAATCCACTGATCCACTGAAGACCACCAGTGGCGAA
ASV_928	0	0	0	33	0	0	0	7	0	0	0	0	0	0	0	0	0	0	0	0	0	Bacteria	Chloroflexi	AD3	NA	NA	NA	NA	CGTTATCCGGATTTACTGGGCGTAAAGCGCGTTAAGGCGGCCGGCAAAGTTGAGGGTGAAATTTCGGGGCTCAACCCCGAAACTGCCTCCAATACTGGTCGGCTAGAGTGCGAGAGAGGAAGGTGGAATTCCCGGTGTAGTAGTGAAATGCGTAGATATCGGGAGGAACACCAGTGGCGAAGGCGGCCTTCTGGCTCGTAACTGACGCTGTAGCG
ASV_929	0	0	0	0	40	0	0	0	0	0	0	0	0	0	0	0	0	0	0	0	0	Bacteria	Chloroflexi	AD3	NA	NA	NA	NA	CGTTATCCAGATTTACTGGGCGTAAAGCGCGTGTAGGCGGCTGGTTAGGTGTGATGTGAAATCCTCGGGCTCAACCCGAGAACTGCATTGCAAACCGGCCTGGCTAGAGTGCAGGAGAGGGAAGCGGAATTCCAGGTGTAGCGGTGAAATGCGTAGATATCTGGAGGAACACCAGTGGCGAAGGCGGCTTCCTGGCCTGTAACTGACGCTGAGAC
ASV_930	0	0	0	0	0	0	40	0	0	0	0	0	0	0	0	0	0	0	0	0	0	Bacteria	Firmicutes	Bacilli	Paenibacillales	Paenibacillaceae	Paenibacillus	NA	CGTTGTCCGGAATTATTGGGCGTAAAGCGCGCGCAGGCGGCGACTTAAGTTTGGTGTTTAAGCCCGGGGCTCAACCCCGGATCGCACTGAAAACTGGGTCACTTGAGTGCGGGAGAGGAAAGTGGAATTCCACGTGTAGCGGTGAAATGCGTAGAGATGTGGAGGAACACCAGTGGCGAAGGCGACTTTCTGGACCGTAACTGACGCTGAGGCGC
ASV_931	0	0	0	0	0	0	0	0	0	23	0	0	0	0	0	0	17	0	0	0	0	Bacteria	Chloroflexi	AD3	NA	NA	NA	NA	ATGTGTCAGCGCCGCGGTAATACGTAGGGGGCGAGCGTTATCCAGATTTACTGGGCGTAAAGCGCGTGTAGGCGGCTGGTTAAGTGTGATGTGAAATCCTCGGGCTCAACCCGAGAACTGCATTGCAAACTGGCCTGGCTAGAGTGCAGGAGAGGGAAGCGGAATTCCAGGTGTAGCGGTGAAATGCGTAGATATCTGGAGGAACACCAGTGGCG
ASV_932	0	0	0	0	0	0	0	0	0	0	0	0	0	0	0	0	27	13	0	0	0	Bacteria	Acidobacteriota	Acidobacteriae	Subgroup 2	NA	NA	NA	CGTTGCTCGGAATTACTGGGCGTAAAGGGTTCGTAGGCGGTGCGGCAAGTTGGGAGTGAAATCTCTGGGCTTAACCCAGAGGCTGCTTTCAAAACTGCCGTGCTCGAGTGCGAGAGAGGTCAGTGGAATTGCAGGTGTAGCGGTGAAATGCGTAGATATCTGCAGGAACACCCGTGGCGAAGGCGGCTGACTGGATCGCAACTGACGCTGAGGAA
ASV_933	0	0	0	0	0	0	0	0	0	0	0	0	0	0	0	0	0	40	0	0	0	Bacteria	Chloroflexi	Chloroflexia	Thermomicrobiales	JG30-KF-CM45	NA	NA	CGTTGTCCGGAGTGACTGGGCGTAAAGCGCGCGCAGGCGGCTCGTGAGGCGGCACGTGAAAGCCCCGGGCTTAACTCGGGAGGGTCGTGGCGAACCAGCGAGCTTGAGGCCGGTAGAGGTGGGTGGAACTCCTGGTGGAGTGGTGAAATGCGTAGAGATCAGGAAGAACACCCGTGGCGAAGGCGCCCACTGGGCCGGTACTGACGCTGAGGCGC
ASV_934	0	0	0	0	0	0	0	0	0	0	0	0	8	0	0	0	0	0	0	0	32	Bacteria	Acidobacteriota	Acidobacteriae	Bryobacterales	Bryobacteraceae	Bryobacter	NA	CGTTGTTCGGAGTTACTGGGCGTAAAGAGTGCGTAGGCGGTTGACCAAGTCTGCTGTGAAATCTCCCGGCTTAACTGGGAGGGTGCGGTGGAAACTGGTTGGCTTGAGAGTGGGAGAGGTAAGCGGAATTCCTGGTGTAGCGGTGAAATGCGTAGATATCAGGAGGAACACCGGTGGTGTAGACGGCTTACTGGACCACGACTGACGCTGAGGCA
ASV_935	0	0	0	0	0	0	0	0	0	0	0	0	0	40	0	0	0	0	0	0	0	Archaea	Crenarchaeota	Nitrososphaeria	Nitrososphaerales	Nitrososphaeraceae	Candidatus Nitrocosmicus	NA	TGTGCAGCGCCGCGGTAATACCAGCACCCCGAGTGGTCGGGACGTTTATTGGGCCTAAAGCATCCGTAGCCGGTTCTACAAGTCTTCCGTTAAATCCAGCTGCTTAACAGATGGGCTGCGGAAGATACTATGGAGCTAGGAGGCGGGAGAGGCAAGCGGTACTCGATGGGTAGGGGTAAAATCCGTTGATCCATTGAAGACCACCAGTGGCGAAG
ASV_937	0	39	0	0	0	0	0	0	0	0	0	0	0	0	0	0	0	0	0	0	0	Bacteria	Planctomycetota	Planctomycetes	Gemmatales	Gemmataceae	NA	NA	GACGAACCGTGCAAACGTTGTTCGGAATCACTGGGCTTAAAGGGCGCGTAGGCGGGCAAGCAAGTCCGGGGTGAAATCTTTCGGCTCAACCGGAAAAGTGCCTTGGATACTGCTTGTCTTGAGGGAGGTAGGGGCATGCGGAACTTCCGGTGGAGCGGTGAAATGCGTTGATATCGGAAGGAACGCCGGTGGCGAAAGCGGCGTGCTAGACCTCTTCTGACGCTGAGGCGCGAAAGCCAGGGGAGC
ASV_938	0	39	0	0	0	0	0	0	0	0	0	0	0	0	0	0	0	0	0	0	0	Bacteria	Proteobacteria	Gammaproteobacteria	JG36-TzT-191	NA	NA	NA	TACAGAGGGTGCGAGCGTTAATCGGAATTACTGGGCGTAAAGCGTGCGTAGACGGTTATGTAAGTCGGGTGTGAAAGCCCCGGGCTCAACCTGGGAATGCCATTCGAAACTGCATAGCTAGGGTGCGGAAGAGGGAAGCGGAATTCCAGGTGTAGCGGTGAAATGCGTAGATATCTGGAGGAACACCAGTGGCGAAGGCGGCTTCCTGGCCTGTAACTGACGCTGAGACGCGAAAGCGTGGGGAGC
ASV_939	0	0	0	0	20	0	0	0	0	0	0	0	19	0	0	0	0	0	0	0	0	Bacteria	Acidobacteriota	Acidobacteriae	Solibacterales	Solibacteraceae	Candidatus Solibacter	NA	CGTTGTTCGGAGTTACTGGGCGTAAAGGGTGTGTAGGCGGCCTTCTAAGTTTGGTGTGAAATCTCCCGGCTCAACCGGGAGGGTGCGCCGAAGACTGGGGGGCTAGAGTATGGGATGGGAGAGTAGAATTTCCGGTGTAGCGGTGAAATGCGTAGATATCGGAAGGAATACCTGTGGTGTAGACGGCTCTCTGGACCATAACTGACGCTGAGACA
ASV_940	0	0	0	0	10	0	0	0	0	0	0	0	0	0	0	0	0	29	0	0	0	Bacteria	Acidobacteriota	Holophagae	Subgroup 7	NA	NA	NA	CGTTATTCGGAATTATTGGGCGTAAAGGGCGCGTAGGCGGCTTGGCAAGTGGAAGGTGAAATCCCTCGGCTTAACCGAGGAACTGCCCTCCAAACTGCTTTGCTTGAGGCCGGGAGAGGTGAGTGGAATTCCCAGTGTAGCGGTGAAATGCGTAGATATTGGGAGGAACACCAGTGGCGAAGGCGGCTCACTGGACCGGTTCTGACGCTGAGGCG
ASV_941	0	0	0	0	12	0	0	12	0	0	0	0	0	15	0	0	0	0	0	0	0	Bacteria	Actinobacteriota	Actinobacteria	Corynebacteriales	Nocardiaceae	NA	NA	CGTTGTCCGGAATTACTGGGCGTAAAGAGCTCGTAGGCGGTTTGTCACGTCGGCTGTGAAAACCCATCGCTCAACGGTGGGCTTGCAGTCGATACGGGCTGACTTGAGTACTGCAGGGGAGACTGGAATTCCTGGTGTAGCGGTGAAATGCGCAGATATCAGGAGGAACACCGGTGGCGAAGGCGGGTCTCTGGGCAGTAACTGACGCTGAGGAG
ASV_942	0	0	0	0	8	0	0	0	0	18	13	0	0	0	0	0	0	0	0	0	0	Bacteria	Planctomycetota	Planctomycetes	Isosphaerales	Isosphaeraceae	NA	NA	CGTTATTCGGAATCACTGGGCTTAAAGCGCGTGTAGGCGGATGGCCACGTCGGGCGCTGAAATCCCCCGGCTCAACCGGGGAACGGGCACCGATACGGGCCGTCTGGAGGGAGGTAGGGGGGGCTGGAACTTCCGGTGGAGCGGTGAAATGCGTTGAGATCGGAAGGAACGCCCGTGGCGAAAGCGAGCCCCTGGACCTCTTCTGACGCTGAGAC
ASV_943	0	0	0	0	0	39	0	0	0	0	0	0	0	0	0	0	0	0	0	0	0	Bacteria	Planctomycetota	Planctomycetes	Isosphaerales	Isosphaeraceae	NA	NA	CGTTATTCGGAATCACTGGGCTTAAAGCGCGTGTAGGTGGCTCGGCACGTCTGTCGCTGAAATCTCCCGGCTCAACCGGGGAACTGGCGTGGATACGACCGGGCTTGAGGGATGTAGGGGGATCGGGAACTTCCGGTGGAGCGGTGAAATGCGTTGAGATCGGAAGGAACGCCCGTGGCGAAAGCGCGGTCCTGGACATTTCCTGACACTGAGAC
ASV_944	0	0	0	0	0	39	0	0	0	0	0	0	0	0	0	0	0	0	0	0	0	Bacteria	Deinococcota	Deinococci	Thermales	Thermaceae	Meiothermus	NA	GTGTCAGCGCCGCGGTAATACGGAGGGTGCGAGCGTTACCCGGATTTACTGGGCGTAAAGGGCGTGTAGGCGGTCCTCTAAGTCCAAGGCTAAAGACTAGGGCTCAACCCTGGACCTGCCTCGGATACTGGAGGGCTCGACGGCTGGAGGGGGCAGCGGAATTTCCGGAGTAGCGGTGAAATGCGCAGATACCGGAAGGAACGCCAATAGCGAAG
ASV_946	0	0	0	0	0	0	0	0	9	30	0	0	0	0	0	0	0	0	0	0	0	Bacteria	Proteobacteria	Gammaproteobacteria	Pseudomonadales	Moraxellaceae	Acinetobacter	NA	CGTTAATCGGATTTACTGGGCGTAAAGCGTGCGTAGGCGGCTTTTTAAGTCGGATGTGAAATCCCCGAGCTTAACTTGGGAATTGCATTCGATACTGGGAAGCTAGAGTATGGGAGAGGATGGTAGAATTCCAGGTGTAGCGGTGAAATGCGTAGAGATCTGGAGGAATACCGATGGCGAAGGCAGCCATCTGGCCTAATACTGACGCTGAGGTA
ASV_947	0	0	0	0	0	0	0	0	6	25	0	0	0	0	8	0	0	0	0	0	0	Bacteria	Chloroflexi	NA	NA	NA	NA	NA	ATGTGTCAGCGCCGCGGTAATACGTAGGGGGCGAGCGTTGTCCGGAATCACTGGGCGTAAAGCGCGCGTAGGCGGGCGCCTACATCCACTGTCAAAGCCCCGGGCTCAACCCGGGGAGGCCGGTGGCGATGGGGGGCCTGGAGGATGGCAGAGGCAGGCGGAAGTCCCGAAGGAGCGGTGAAATGCGTAGAGATCGGGAGGAACACCGGAGGCGC
ASV_948	0	0	0	0	0	0	0	0	0	0	39	0	0	0	0	0	0	0	0	0	0	Bacteria	Acidobacteriota	Acidobacteriae	Acidobacteriales	Koribacteraceae	Candidatus Koribacter	NA	CGTTGTTCGGAATTATTGGGCGTAAAGGGCGCGTAGGCGGTGCGGTAAGTCTTCTGTGAAATCTCCGGGCTCAACTCGGAGCCTGCAGGGGAAACTGCCGTGCTGGAGTATGGGAGAGGTGAGTGGAATTCCCGGTGTAGCGGTGAAATGCGTAGATATCGGGAGGAACACCAGTGGCGAAGGCGGTTACCTGGGCTTGTTCTGACGCTGAGGCA
ASV_949	0	0	0	0	0	0	0	0	0	0	0	0	0	0	0	0	11	28	0	0	0	Bacteria	Actinobacteriota	Acidimicrobiia	IMCC26256	NA	NA	NA	CGTTGTCCGGATTTATTGGGCGTAAAGAGCTCGTAGGCGGTTCGGTAAGTCGGATGTGAAATCTCCACGCTCAACGTGGAGGGGCCATTCGATACTGCCGTGACTAGAGTCCGGTAGGGGAGTGTGGAATTCCCGGTGTAGCGGTGAAATGCGCAGAGATCGGGAGGAACACCCGTAGCGAAGGCGGCACTCTGGGCCGTGACTGACGCTGAGGA
ASV_950	0	0	0	0	0	0	0	0	0	0	0	0	0	0	0	0	0	0	0	22	17	Bacteria	Chloroflexi	NA	NA	NA	NA	NA	CGTTGTCCGGATTTACTGGGCGTAAAGGGCGCGCAGGCGGCTCGATAAGTCACTCGTGAAATTTCCCGGCTAAACTGGGAAGGGTCGAGTGATACTGTCAGGCTAGAGAGCAGCAGAGGATAGTAGAATTCCCGGTGTAGTGGTGAAATGCGTAGATATCGGGAGGAATACCAGTGGCGAAAGCGGCTATCTGGGCTGTGTCTGACGCTGAGGCG
ASV_951	0	0	27	0	0	11	0	0	0	0	0	0	0	0	0	0	0	0	0	0	0	Bacteria	Armatimonadota	Armatimonadia	Armatimonadales	NA	NA	NA	CGTTGTCCGAATTTACTGGGCGTAAAGCGCGCGTAGGCGGTCATTTAAGTCCGGGGTGAAAGGTTCAGCGCTCAACGCGAACAGTGCCTCGGATACTGGGTGACTTGAGTCTGGCAGGGGGTGGCGGAATTCCTGGTGTAGCGGTGAAATGCGTAGATATCAGGAGGAACACCGGTGGCGAAGGCGGCCACCTGGGCTAAGACTGACGCTGAGGT
ASV_952	0	0	0	38	0	0	0	0	0	0	0	0	0	0	0	0	0	0	0	0	0	Archaea	Crenarchaeota	Nitrososphaeria	Nitrososphaerales	Nitrososphaeraceae	Candidatus Nitrososphaera	NA	TGTGCAGCGCCGCGGTAATACCAGCACCCCGAGTGGTCGGGACGATTATTGGGCCTAAAGCATCCGTAGCCTGTCCTGCAAGTCTTCCGTTAAATCCACCTGCTTAACAGATGGGCCGCGGAGGATACTACAGGGCTAGGAGGCGGGAGAGGCAAACGGTACTCAGTGGGTAGGGGTAAAATCCACTGATCCACTGAAGACCACCAGTGGCGAAG
ASV_953	0	0	0	0	21	0	0	0	0	0	0	0	17	0	0	0	0	0	0	0	0	Bacteria	Actinobacteriota	Thermoleophilia	Gaiellales	NA	NA	NA	CGTTGTCCGGATTTATTGGGCGTAAAGAGCGTGTAGGCGGCCATGCAGGTCTGCTGTGAAAACTCGAGGCTCAACCTCGAGCTGTCGGCGGAAACCGTATGGCTAGAGTCCGGAAGAGGAGAGTGGAATTCCTGGTGTAGCGGTGAAATGCGCAGATATCAGGAAGAACACCCGTGGCGAAGGCGGCTCTCTGGGACGGTACTGACGCTGAGACG
ASV_954	0	0	0	0	9	0	0	0	0	0	0	0	29	0	0	0	0	0	0	0	0	Bacteria	Acidobacteriota	Acidobacteriae	Acidobacteriales	NA	NA	NA	CGTTGTTCGGAATTATTGGGCGTAAAGGGCGCGTAGGCGGTGCGGTAAGTCACCTGTGAAACCTCTGGGCTTAACCCAGAGCCTGCAGGCGAAACTGCCGTGCTGGAGTATGGGAGAGGTGAGTGGAATTCCCGGTGTAGCGGTGAAATGCGTAGATATCGGGAGGAACACCTGTGGCGAAAGCGGCTCACTGGACCATAACTGACGCTGAGGCG
ASV_955	0	0	0	0	0	0	38	0	0	0	0	0	0	0	0	0	0	0	0	0	0	Archaea	Crenarchaeota	Nitrososphaeria	Nitrososphaerales	Nitrososphaeraceae	Candidatus Nitrososphaera	NA	ATGTGCCAGCCGCGGTAATACCAGCACCCCGAGTGGTCGGGACGATTATTGGGCCTAAAGCATCCGTAGCCTGTCCTGCAAGTCTTCCGTTAAATCCACCTGCTTAACAGATGGGCCGCGGAGGATACTACAGGGCTAGGAGGCGGGAGAGGCAAACGGTACTCAGTGGGTAGGGGTAAAATCCACTGATCCACTGAAGACCACCAGTGGCGAAG
ASV_956	0	0	0	0	0	0	0	0	25	0	0	0	0	0	0	3	10	0	0	0	0	Bacteria	Chloroflexi	Ktedonobacteria	Ktedonobacterales	Ktedonobacteraceae	NA	NA	CGTTGTCCGGATTTATTGGGCGTAAAGCGCACGCAGGCGGTCTCTTACGTTTTGAGTGACAGGTGGTGGCTCAACTGCCACAGGCCTTGAAATACGGGGAGACTTGAGGACTTCAGAGGGATGCGGAATTCCAGGTGGAGCGGTGAAATGCGTAGAGATCTGGAAGAACACCAATGGCGAAGGCAGCATCCTGGGAAGTAACTGACGCTGAGGTG
ASV_957	0	0	0	0	0	0	0	0	0	0	0	0	0	0	0	5	7	26	0	0	0	Bacteria	Myxococcota	Polyangia	Polyangiales	Polyangiaceae	NA	NA	CGTTGTTCGGAATTACTGGGCGTAAAGCGCGTGTAGGCCGCTCCAAAAGTCGGATGTGAAAGCCCTGGGCTCAACCTAGGAAGTGCATTCGAAACTGCGGAGCTTGAGTCCTGGAGAGGAAGGCGGAATTCTCGGTGTAGAGGTGAAATTCGTAGATATCGAGAGGAACACCGGTGGCGAAGGCGGCCTTCTGGACAGTGACTGACGCTGAGACG
ASV_958	0	0	0	0	0	0	0	0	0	0	0	0	0	0	0	0	38	0	0	0	0	Bacteria	Planctomycetota	Planctomycetes	Gemmatales	Gemmataceae	NA	NA	CGTTGTTCGGAATCACTGGGCTTAAAGGGCGCGTAGGCGGACCGTTTAGTCCGGGGTGAAAGCCCCCAGCTCAACTGGGGAATAGCCTCGGATACTGGCGGTCTCGAGGGAGGTAGGGGCAGCTGGAACTTCCGGTGGAGCGGTGAAATGCGTTGATATCGGAAGGAACGCCTGTGGCGAAAGCGAGCTGCTGGGCCTTTTTCTGACGCTGAGGC
ASV_959	0	0	0	0	0	0	0	0	0	0	0	0	38	0	0	0	0	0	0	0	0	Bacteria	Planctomycetota	Planctomycetes	Gemmatales	Gemmataceae	NA	NA	CGTTGTTCGGAATCACTGGGCTTAAAGGGCGCGTAGGCGGGCATTAAAGTCAGGGGTGAAATCCCTCAGCTTAACTGAGGAACTGCCTTTGATACTGAATGCCTCGAGTAAGGTAGGGGCATGCGGAACTGATGGTGGAGCGGTGAAATGTGTTGATATCATCAGGAACTCCGGTGGCGAAGGCGGCATGCTGGACCTTCACTGACGCTGAGGCG
ASV_960	0	0	0	0	0	0	0	0	0	0	0	0	0	38	0	0	0	0	0	0	0	Bacteria	Chloroflexi	Chloroflexia	NA	NA	NA	NA	CGTTGTCCGGAATACTGGGCGTAAAGCGCGCGTAGGCGGTCTTTCGCGTAGGCGGTGAAAGCCCCCGGCCTCACCTGGGGGAGGTCCGGCCTAAACGGGGAGACTGGAGGGCGGTAGGGGCTGGCGGAACGCCCGGAGTAGCGGTGAAATGCGTTGAGATCGGGCAGAACACCAGTGGCGAAGGCGGCCGGCTGGGCCGACCCTGACGCTGAGGC
ASV_961	0	0	0	0	29	0	0	0	0	0	8	0	0	0	0	0	0	0	0	0	0	Bacteria	Actinobacteriota	Acidimicrobiia	IMCC26256	NA	NA	NA	CGTTGTCCGGATTTATTGGGCGTAAAGGGCCCGTAGGCGGCTTGATAAGTCGGGTGTGAAAACTCCAGGCTCAACCTGGAGACGCCACCCGATACTGTCATGGCTTGAGTCTGGTAGGGGAGTGCGGAATTCCTGGTGTAGCGGTGAAATGCGCAGATATCAGGAGGAACACCGGTGGCGAAGGCGGCACTCTGGGCCAGTACTGACGCTGATGG
ASV_962	0	0	0	0	11	0	0	0	0	0	0	0	0	0	0	0	0	0	0	0	26	Bacteria	Armatimonadota	Chthonomonadetes	Chthonomonadales	Chthonomonadaceae	Chthonomonas	NA	CGTTGTCCGAAGTACTGGGCGTAAAGCGCGCGTAGGCGGGTTCTTAAGTCTGCTGTGAAAGCCCGAAGCTCAACTTCGGAGGGTCGGTGGATACTGGGAGCCTTGAAGGTGCTAGGGAGAAGTGGAATTACCGGTGTAGCGGTGAAATGCGTAGAGCTCGGTAGGAACACCAGTGGCGAAGGCGGCTTCTTGGGGCACTCTTGACGCTGAGGCGC
ASV_963	0	0	0	0	0	0	0	0	27	0	0	0	0	0	0	10	0	0	0	0	0	Bacteria	Acidobacteriota	Acidobacteriae	Acidobacteriales	Koribacteraceae	Candidatus Koribacter	NA	ATGTGCAGCGCCGCGGTAATACAGAGGGTGCAAGCGTTGTTCGGAATTATTGGGCGTAAAGGGCGCGTAGGCGGTGCGGTAAGTCTTCTGTGAAATCTCCGGGCTCAACTCGGAGCCTGCAGGGGAAACTGCCGTGCTGGAGTATGGGAGAGGTGAGTGGAATTCCCGGTGTAGCGGTGAAATGCGTAGATATCGGGAGGAACACCTGTGGCGAA
ASV_964	0	0	0	0	0	0	0	0	0	37	0	0	0	0	0	0	0	0	0	0	0	Bacteria	Chloroflexi	Ktedonobacteria	Ktedonobacterales	Ktedonobacteraceae	NA	NA	CGTTGTCCGGAGTACTGGGCGTAAAGCGCACGTAGGCGGTCGCCCGCGTTCGGCTGACAGTGGAGGGCTTCACTCTCCAAGGCGTCGAAAAACGGGGTGACTGGAGGGCCTCAGAGGGACCTGGAACTCCGGGTGGAGCGGTGAAATGCGTAGAGATCCGGAAGAACACCACAGGCGAAGGCAGGGTCCTGGGAGGTACCTGACGCTCAGGTGCG
ASV_965	0	0	0	0	0	0	0	0	0	37	0	0	0	0	0	0	0	0	0	0	0	Bacteria	Chloroflexi	NA	NA	NA	NA	NA	CGTTATCCGGATTTACTGGGCGTAAAGCGCGCTAAGGCGGCCGGCTAAGTTGGGGGTGAAATCTCGGGGCTCAACCCCGGAACTGCCTCCAATACTGGTCGGCTCGAGTTCGGGAGAGGAAGGTGGAATTCCCGGTGTAGTAGTGAAATGCGTAGATATCGGGAGGAACACCAGTGGCGAAGGCGGCCTTCTGGCCCGCAACTGACGCTGTACGC
ASV_966	0	0	0	0	0	0	0	0	0	0	12	0	0	0	0	15	0	10	0	0	0	Bacteria	Chloroflexi	NA	NA	NA	NA	NA	CGTTATCCGGAATTACTGGGCGTAAAGGGCGTCTAGGCGGGAGAGCAAGCGGGGTGTGAAAGCTTCCAGCTTAACTGGGAGAGTGCGCTCCGAACTACTGATCTAGAGGGTGGGCGAAGGGGGTGGAATTCCCGGTGGAGTGGTGAAATGCGTAGAGATCGGGAGGAACACCAGAGGCGCAAGCGGCCCCCTAGCCTATACCTGACGCTGAAGCG
ASV_967	0	0	0	0	0	0	0	0	0	0	37	0	0	0	0	0	0	0	0	0	0	Bacteria	Planctomycetota	Planctomycetes	Gemmatales	Gemmataceae	NA	NA	GATGTGTCAGCGCCGCGGTAAGACGAACCGTGCAAACGTTGTTCGGATTCACTGGGCTTAAAGGGCGCGTAGGCGGCTCGCCAAGTCAGGGGTGAAATCTTTCGGCTTAACCGGAAAACAGCTTCTGATACTGGCGGGCTAGAGGGAGGTAGGGGCATGTGGAACTTCCGGTGGAGCGGTGAAATGCGTAGATATCGGAAGGAACGCCGGTGGCG
ASV_968	0	0	0	0	0	0	0	0	0	0	0	0	8	0	0	9	8	12	0	0	0	Bacteria	GAL15	NA	NA	NA	NA	NA	CGTTGTCCGGATTTACTGGGCGTAAAGCGCGTGTAGGCGGCCTGTTAAGTGGCGTGTGAAAGCCCACGGCTCAACCGTGGGAGGCCGCGCCAAACTGGCGGGCTTGAGGGTGGCAGAGGATGATGGAATTCCCGGTGTAGCGGTGAAATGCGTAGATATCGGGAGGAACGCCAGTGGCGAAGGCGGTCATCTGGGCCACCCCTGACGTTGAGACG
ASV_969	0	0	0	0	0	0	0	0	0	0	0	0	0	0	0	0	0	0	37	0	0	Bacteria	Chloroflexi	AD3	NA	NA	NA	NA	ATGTGTCAGCGCCGCGGTAATACGTAGGGGGCGAGCGTTACCCGGATTCACTGGGCGTAAAGCGCGTGTAGGCGGCTGGTCAAGCGTGGTGTGAAATCTCCGGGCTCAACCCGGAAACTGCACTGCGAACTGGCCTGGCTGGAGTGCAGGAGAGGGCAGCGGAATTCCCGGTGTAGCGGTGAAATGCGTAGATATCGGGAGGAACACCGGTGGCG
ASV_970	0	0	0	0	0	0	0	0	0	0	0	0	0	0	0	0	0	0	0	0	37	Bacteria	Proteobacteria	Alphaproteobacteria	Rhizobiales	Xanthobacteraceae	Bradyrhizobium	NA	ATGTGCAGCGCCGCGGTAATACGAAGGGGGCTAGCGTTGCTCGGAATCACTGGGCGTAAAGGGTGCGTAGGCGGGTCTTTAAGTCAGGGGTGAAATCCTGGAGCTCAACTCCAGAACTGCCTTTGATACTGAAGATCTTGAGTTCGGGAGAGGTGAGTGGAACTGCGAGTGTAGAGGTGAAATTCGTAGATATTCGCAAGAACACCAGTGGCGAA
ASV_971	36	0	0	0	0	0	0	0	0	0	0	0	0	0	0	0	0	0	0	0	0	Bacteria	Acidobacteriota	Blastocatellia	2024-11-01	NA	NA	NA	TACGGGGGGGGCAAGCGTTGTTCGGAATTACTGGGCGTAAAGGGCGCGTAGGCGGCTCTTCAAGTCGGGCGTGAAATCTCCGGGCTTAACCCGGAAGGGTCGTTCGATACTGTCGGGCTGGAGTGCGGAAGAGGCCACCGGAATTCCGTGTGTAGCGGTGAAATGCGTAGATATACGGAGGAACACCTGCGGCGAAGGCGGGTGGCTGGGCCGACACTGACGCTGAGGCGCGAAAGCTAGGGGAGC
ASV_972	0	36	0	0	0	0	0	0	0	0	0	0	0	0	0	0	0	0	0	0	0	Bacteria	Proteobacteria	Alphaproteobacteria	Rhizobiales	Xanthobacteraceae	NA	NA	TACGAAGGGGGCTAGCGTTGCTCGGAATCACTGGGCGTAAAGGGTGCGTAGGCGGGTCTTTAAGTCAGGGGTGAAATCCTGGAGCTCAACTCCAGAACTGCCTTTGATACTGAGGATCTTGAGTTCGGGAGAGGTGAGTGGAACTGCGAGTGTAGAGGTGAAATTCGTAGATATTCGCAAGAACACCAGTGGCGAAGGCGGCTCACTGGCCCGATACTGACGCTGAGGCACGAAAGCGTGGGGAGC
ASV_973	0	0	14	0	0	22	0	0	0	0	0	0	0	0	0	0	0	0	0	0	0	Bacteria	Proteobacteria	Alphaproteobacteria	Rhizobiales	Rhizobiaceae	Mesorhizobium	NA	CGTTGTTCGGAATTACTGGGCGTAAAGCGCACGTAGGCGGATACTTAAGTCAGGGGTGAAATCCCGGGGCTCAACCCCGGAACTGCCTTTGATACTGGGTATCTGGAGTCCGGAAGAGGTGAGTGGAATTCCGAGTGTAGAGGTGAAATTCGTAGATATTCGGAGGAACACCAGTGGCGAAGGCGGCTCGCTGGTCCGGTACTGACGCTGAGGTG
ASV_974	0	0	0	0	5	0	0	0	0	0	0	0	0	0	0	0	9	22	0	0	0	Bacteria	Acidobacteriota	Acidobacteriae	Solibacterales	Solibacteraceae	Candidatus Solibacter	NA	CGTTGTTCGGAGTTACTGGGCGTAAAGGGTGTGTAGGTGGCCTGTTAAGTTCCGTGTGAAATCTCCCGGCTCAACCGGGAGGGTGCGCGGAAAACTGGCGGGCTAGAGTACGGGATGGGAGAGTAGAATTCCTGGTGTAGCGGTGAAATGCGTAGATATCAGGAGGAATACCGGTGGTGTAGACGGCTCTCTGGACCGTAACTGACACTGAGACA
ASV_975	0	0	0	0	0	13	23	0	0	0	0	0	0	0	0	0	0	0	0	0	0	Bacteria	Firmicutes	Bacilli	Alicyclobacillales	Alicyclobacillaceae	Tumebacillus	NA	CGTTGTCCGGAATCACTGGGCGTAAAGCGCGCGCAGGCGGTCATCTACGTCCGGGGTGAAAGCCCAGAGCTCAACTCTGGGATTGCCTTGGATACGGGGTGACTTGAGGATCGGAGAGGCAAGGGGAATTCCACGTGTAGCGGTGAAATGCGTAGAGATGTGGAGGAACACCTGTGGCGAAGGCGCCTTGCTGGCCGATTTCTGACGCTGAGGCG
ASV_976	0	0	0	0	0	0	36	0	0	0	0	0	0	0	0	0	0	0	0	0	0	Bacteria	Proteobacteria	Gammaproteobacteria	Xanthomonadales	Rhodanobacteraceae	Mizugakiibacter	NA	ATGTGTCAGTCGCCGCGGTAATACGGAGGGTGCAAGCGTTAATCGGAATTACTGGGCGTAAAGCGTGCGTAGGTGGTTCGTTAAGTCCGTTGTGAAAGCCCCGAGCTCAACTTGGGAATTGCAGTGGATACTGATGAGCTGGAGTGCGGTAGAGGAAGGTGGAATTCCCGGTGTAGCGGTGAAATGCGTAGAGATCGGGAGGAACACCAGTGGCG
ASV_977	0	0	0	0	0	0	0	0	13	0	0	0	0	0	9	0	0	0	3	0	11	Bacteria	Acidobacteriota	Acidobacteriae	NA	NA	NA	NA	ATGTGCAGCGCCGCGGTAATACGTAGGCAGCAAGCGTTGTTCGGAGTTACTGGGCGTAAAGAGTGCGTAGGCGGTCTGGCAAGTTCGGTGTGAAATCTCCCGGCTTAACCGGGAGGGTGCGCCGAAGACTGTCGGGCTGGAGTGTGGGAGAGGCAGGCGGAATTCCTGGTGTAGCGGTGAAATGCGTAGATATCAGGAGGAACACCGGTGGTGTA
ASV_978	0	0	0	0	0	0	0	0	0	36	0	0	0	0	0	0	0	0	0	0	0	Bacteria	Myxococcota	Polyangia	Polyangiales	Polyangiaceae	Pajaroellobacter	NA	CGTTGTTCGGAATACTGGGCGTAAAGCGTGTGTAGGCGGCTACGTAAGTCGGATGTGAAAGCCCCGGGCTCAACCCGGGAAGTGCACTCGATACTGCGTAGCTTGAGTATCGGAGAGGTTGGTGGAATTCTCGGTGTAGAGGTGAAATTCGTAGATATCGAGAGGAACACCGGTGGCGAAGGCGGCCAACTGGACGAATACTGACGCTGAGACAC
ASV_979	0	0	0	0	0	0	0	0	0	0	0	36	0	0	0	0	0	0	0	0	0	Bacteria	Proteobacteria	Gammaproteobacteria	Xanthomonadales	Rhodanobacteraceae	Mizugakiibacter	NA	CGTTAATCGGAATTACTGGGCGTAAAGCGTGCGTAGGTGGTTCGTTAAGTCCGTTGTGAAAGCCCCGAGCTCAACTTGGGAATTGCAGTGGATACTGATGAGCTGGAGTGCGGTAGAGGAAGGTGGAATTCCCGGTGTAGTGGTGAAATGCGTAGAGATCGGGAGGAACACCTGAGGCGAAGGCGGCCAGCTGGCCCTGTCCTGACGCTGAGGCG
ASV_980	0	0	0	0	0	0	0	0	0	0	0	0	0	0	0	0	0	0	17	0	19	Bacteria	Proteobacteria	Alphaproteobacteria	Rhizobiales	Xanthobacteraceae	Rhodoplanes	NA	CGTTGCTCGGAATCACTGGGCGTAAAGCGCACGTAGGCGGCTTTTTAAGTCAGGGGTGAAATCCTGGAGCTCAACTCCAGAACTGCCTTTGATACTGAGAAGCTCGAGTCCGGGAGAGGTGAGTGGAACTGCGAGTGTAGAGGTGAAATTCGTAGATATTCGCAAGAACACCAGTGGCGAAGGCGGCTCACTGGCCCGGTACTGACGCTGATGTG
ASV_981	0	0	0	0	0	0	0	0	0	0	0	0	0	0	0	0	0	0	36	0	0	Bacteria	Firmicutes	NA	NA	NA	NA	NA	CGTTGTCCGGAATTACTGGGCGTAAAGGGCGTGTAGGCGGCTAGGTACGTCTTCAGGGAAATCCGCCGGCTCAACCGGCGGGGTGCTGGGGAAACGGCCTAGCTTGAGGGCAGGAGAGGGAAGCGGAATTCCCGGTGTAGCGGTGAAATGCGTAGAGATCGGGAGGAACACCCGTGGCGAAGGCGGCTTCCTGGACTGTGCCTGACGCTGAAGCG
ASV_982	0	0	0	0	0	0	0	0	0	0	0	0	0	0	0	0	0	0	0	0	36	Bacteria	Proteobacteria	Alphaproteobacteria	Rhizobiales	Beijerinckiaceae	Psychroglaciecola	NA	CGTTGCTCGGAATCACTGGGCGTAAAGGGCGCGTAGGCGGCCGATCAAGTCAGAGGTGAAAGCCCAAGGCTCAACCTTGGAATTGCCTTTGATACTGTTTGGCTAGAGACCGGAAGAGGTAAGTGGAACTGCGAGTGTAGAGGTGAAATTCGTAGATATTCGCAAGAACACCAGTGGCGAAGGCGGCTTACTGGTCCGGTTCTGACGCTGAGGCG
ASV_983	0	0	0	0	0	0	0	0	0	0	0	0	29	0	0	0	0	0	0	0	7	Bacteria	Dependentiae	Babeliae	Babeliales	Vermiphilaceae	NA	NA	CGTTATTCGGAATCATTGGGCGTAAAGGGTGCGTAGACGGTATGTTAAGTTCGTTGTTAAATCCTTCGGCTCAACCGAAGATATGCAGTGAATACTGGCGTGCTAGAGGGTGGAAGAGAGAAGTGGAATTCTCGGAGTAGCGGTAAAATGCGTAGATCTCGAGAGGAACACCAATGGCGAAGGCAGCTTCTTGGTCCACTCCTGACGTTGAGGCA
ASV_984	35	0	0	0	0	0	0	0	0	0	0	0	0	0	0	0	0	0	0	0	0	Bacteria	Deinococcota	Deinococci	Thermales	Thermaceae	Meiothermus	NA	TACGGAGGGTGCGAGCGTTACCCGGATTTACTGGGCGTAAAGGGCGTGTAGGCGGTCCCTCAAGTCCGATGCTAAAGACCGGGGCTCAACCCCGGGGGTGCGTTGGATACTGTCGGGCTAGACGGTCGGAGGGGGCAGCGGAATTTCCGGAGTAGCGGTGAAATGCGCAGATACCGGAAGGAACGCCAATAGCGAAGGCAGCTGCCTGGACGACTTGTGACGCTGAGGCGCGAAAGCGTGGGGAGC
ASV_985	0	35	0	0	0	0	0	0	0	0	0	0	0	0	0	0	0	0	0	0	0	Bacteria	Proteobacteria	Alphaproteobacteria	Sphingomonadales	Sphingomonadaceae	Novosphingobium	NA	TACGGAGGGGGCTAGCGTTGTTCGGAATTACTGGGCGTAAAGCGCACGTAGGCGGCTATTCAAGTCAGAGGTGAAAGCCCGGGGCTCAACCCCGGAACTGCCTTTGAAACTAGATAGCTAGAATCTTGGAGAGGTCAGTGGAATTCCGAGTGTAGAGGTGAAATTCGTAGATATTCGGAAGAACACCAGTGGCGAAGGCGACTGACTGGACAAGTATTGACGCTGAGGTGCGAAAGCGTGGGGAGC
ASV_986	0	35	0	0	0	0	0	0	0	0	0	0	0	0	0	0	0	0	0	0	0	Bacteria	Chloroflexi	Ktedonobacteria	Ktedonobacterales	Ktedonobacteraceae	1921-2	NA	GACGTAGGGGGCGAGCGTTGTCCGGAGTTACTGGGCGTAAAGGGCACGCAGGCGGTCTGCGACGTTTGCCATGACAGGGTCGGGCTTCACTCGACCAGGAGGGCGAAAACGAGCGGACTTGAGGCTTGGAGAGGGACCTGGAATTCCGGGTGGAGTGGTGAAATGCGTAGAGATCCGGAGGAACACCGAAGGCGAAGGCAGGGTCCTGGCCAAGAACTGACGCTGAGGTGCGAAAGCCAGGGGAGC
ASV_987	0	0	20	15	0	0	0	0	0	0	0	0	0	0	0	0	0	0	0	0	0	Bacteria	Firmicutes	NA	NA	NA	NA	NA	CGTTGTCCGGAATTACTGGGCGTAAAGGGCGTCTAGGCGGCCCGATACGTCGGCAGTGAAAGGCGCCGGCTCAACTGGCGCAGGTCTGCCGAAACGGCCGGGCTTGAGGGCAGGAGAGGGAAGCGGAATTCCCGGTGTAGCGGTGAAATGCGTAGAGATCGGGAGGAACACCAGTGGCGAAGGCGGCTTCCTGGACTGCCCCTGACGCTGAAGCG
ASV_988	0	0	0	0	0	0	0	35	0	0	0	0	0	0	0	0	0	0	0	0	0	Bacteria	Actinobacteriota	Acidimicrobiia	NA	NA	NA	NA	CGTTGTCCGGATTTATTGGGCGTAAAGAGCTCGTAGGCGGCTCGGCAAGTCGGATGTGAAACCTCCAGGCTCAACCTGGAGTCGCCATTCGATACTGCCGTGGCTAGAGTTTGGTAGGGGACCACGGAATTCCTGGTGTAGCGGTGAAATGCGCAGATATCAGGAGGAACACCAGCGGCGAAGGCGGTGGTCTGGGCCAATACTGACGCTGAGGA
ASV_989	0	0	0	0	0	0	0	0	0	0	0	0	0	0	0	0	0	35	0	0	0	Bacteria	NA	NA	NA	NA	NA	NA	CGTTATCCGGAATTACTGGGCGTAAAGAGTTCGTAGGTGGCGAGCTAAGTTAGGTGCGAAATCTCGCGGCTCAACCGTGTAGACTGTGCCTAAAACTAGTTTGCTTGAGGATCGTAGAGGCAAGCGGAATTGGTAGTGTAGCAGTGAAATGCGTAGATATTACCAGGAACACCAATGGCGAAGGCAGCTTGCTGGGCGAAACCTGACACTGAGGA
ASV_990	0	0	0	0	0	0	0	0	0	0	0	0	0	0	0	0	0	0	0	10	25	Bacteria	Proteobacteria	Alphaproteobacteria	Rhizobiales	Xanthobacteraceae	Pseudorhodoplanes	sinuspersici	CGTTGCTCGGAATCACTGGGCGTAAAGCGCACGTAGGCGGCTTTCTAAGTCAGGGGTGAAATCCTGGAGCTCAACTCCAGAACTGCCTTTGATACTGGAGAGCTTGAGTTCGAGAGAGGTGAGTGGAACTGCGAGTGTAGAGGTGAAATTCGTAGATATTCGCAAGAACACCAGTGGCGAAGGCGGCTCACTGGCTCGATACTGACGCTGAGGTG
ASV_991	0	0	0	0	0	0	0	0	0	0	0	0	0	0	0	0	0	0	0	11	24	Bacteria	Proteobacteria	Alphaproteobacteria	Sphingomonadales	Sphingomonadaceae	Novosphingobium	bradum	CGTTGTTCGGAATTACTGGGCGTAAAGCGCACGTAGGCGGCTATTCAAGTCAGAGGTGAAAGCCCGGGGCTCAACCCCGGAACTGCCTTTGAAACTAGGTAGCTAGAATCTTGGAGAGGTCAGTGGAATTCCGAGTGTAGAGGTGAAATTCGTAGATATTCGGAAGAACACCAGTGGCGAAGGCGACTGACTGGACAAGTATTGACGCTGAGGTG
ASV_992	0	34	0	0	0	0	0	0	0	0	0	0	0	0	0	0	0	0	0	0	0	Bacteria	Acidobacteriota	Holophagae	Subgroup 7	NA	NA	NA	TACAGAGGGGGCAAGCGTTATTCGGAATTATTGGGCGTAAAGGGCGCGTAGGCGGCCTGGCAAGTGGATGGTGAAATCCCTCGGCTTAACCGAGGAACTGCCATCCAGACTGTTAGGCTTGAGACCGGGAGAGGTGAGTGGAATTCCCAGTGTAGCGGTGAAATGCGTAGATATTGGGAGGAACACCAGTGGCGAAGGCGGCTCACTGGACCGGTACTGACGCTGAGGCGCGAAAGCGTGGGGAGC
ASV_993	0	34	0	0	0	0	0	0	0	0	0	0	0	0	0	0	0	0	0	0	0	Bacteria	Chloroflexi	AD3	NA	NA	NA	NA	TACGTAGGGGGCAAGCGTTATCCGGATTTACTGGGCGTAAAGCGCGCTAAGGCGGCCGGCTAAGTTGGGGGTGAAATCTCGGGGCTCAACCCCGGAACTGCCTCCAATACTGGTCGGCTCGAGTTCGGGAGAGGAAGGTGGAATTCCCGGTGTAGTAGTGAAATGCGTAGATATCGGGAGGAACACCAGTGGCGAAGGCGGCCTTCTGGCCCGCAACTGACGCTGTAGCGCGAAAGCGTGGGGAGC
ASV_994	0	34	0	0	0	0	0	0	0	0	0	0	0	0	0	0	0	0	0	0	0	Bacteria	Proteobacteria	Alphaproteobacteria	Rhizobiales	Xanthobacteraceae	NA	NA	TACGAAGGGGGCTAGCGTTGCTCGGAATCACTGGGCGTAAAGCGCACGTAGGCGGCTTGTTAAGTCAGGGGTGAAATCCTGGAGCTCAACTCCAGAACTGCCTTTGATACTGGCGAGCTTGGAGTCCGGGAGAGGTGAGTGGAACTGCGAGTGTAGAGGTGAAATTCGTAGATATTCGCAAGAACACCAGTGGCGAAGGCGGCTCACTGGCCCGGTACTGACGCTGAGGTGCGAAAGCGTGGGGAG
ASV_995	0	0	12	0	0	15	0	0	0	0	0	0	0	7	0	0	0	0	0	0	0	Bacteria	Proteobacteria	Alphaproteobacteria	Rhizobiales	Methyloligellaceae	NA	NA	CGTTGTTCGGAATTACTGGGCGTAAAGCGCACGTAGGCGGATTGTTAAGTCAGGGGTGAAATCCCGAGGCTCAACCTCGGAACTGCCTTTGGTACTGGCAATCTCGAGTCCGGAAGAGGTGAGTGGAATTCCTAGTGTAGAGGTGAAATTCGTAGATATTAGGAAGAACACCAGTGGCGAAGGCGGCTCACTGGTCCGGTACTGACGCTGAGGTG
ASV_996	0	0	0	14	0	0	0	0	0	0	0	5	0	15	0	0	0	0	0	0	0	Bacteria	Firmicutes	YNPFFP2	NA	NA	NA	NA	CGTTGTCCGGAATTACTGGGCGTAAAGGGCGTGTAGGCGGTTTCTTAAGTCGGATGTGAAAGGCCAGGGCTTAACCGTGGCATTGCATCCGAAACTGGGGAGCTTGAGGGTGGTAGAGGAGAGCGGAATTCCCGGTGTAGCGGTAAAATGCGTAGATATCGGGAGGAACACCAGTGGCGAAGGCGGCTCTCTGGGCCAACCCTGACGCTGAGGCG
ASV_997	0	0	0	0	15	0	0	0	0	0	13	0	6	0	0	0	0	0	0	0	0	Bacteria	Bdellovibrionota	Oligoflexia	0319-6G20	NA	NA	NA	CGTTGTTCGGAATCATTGGGCGTAAAGCGCGTGTAGGCGGTTAGTTAAGTCGGGTGTGAAATCCCTGGGCTCAACCGAGGAAGTGCATTCGAAACTAACTAGCTAGAGAATGGTAGAGGAAGGTGGAATTCCTAGTGTAGAGGTGAAATTCGTAGATATTAGGAGGAATACCGGTGGCGAAGGCGGCCTTCTGGACCATTTCTGACGCTGAGACG
ASV_998	0	0	0	0	0	34	0	0	0	0	0	0	0	0	0	0	0	0	0	0	0	Archaea	Crenarchaeota	Nitrososphaeria	Nitrososphaerales	Nitrososphaeraceae	Candidatus Nitrocosmicus	NA	TGGTCGGGACGTTTATTGGGCCTAAAGCATCCGTAGCCGGTTCTACAAGTCTTCCGTTAAATCCAGCTGCTTAACAGATGGGCTGCGGAAGATACTATGGAGCTAGGAGGCGGGAGAGGCAAGTGGTACTCGATGGGTAGGGGTAAAATCCGTTGATCCATTGAAGACCACCAGTGGCGAAGGCGGCTTGCCAGAACGCGCTCGACGGTGAGGGA
ASV_999	0	0	0	0	0	0	12	0	0	0	0	22	0	0	0	0	0	0	0	0	0	Bacteria	Firmicutes	NA	NA	NA	NA	NA	CGTTGTCCGGAATTACTGGGCGTAAAGGGCGTCTAGGCGGCCCGAGACGTCGGCAGTGAAAGGCGCCGGCTCAACTGGCGCAGGTCTGCCGAAACGGCCGGGCTTGAGGGCAGGAGAGGGAAGCGGAATTCCCGGTGTAGCGGTGAAATGCGTAGAGATCGGGAGGAACACCAGTGGCGAAGGCGGCTTCCTGGACTGCCCCTGACGCTGAAGCG
ASV_1000	0	0	0	0	0	0	5	0	0	0	0	0	0	0	0	0	0	0	0	0	29	Bacteria	Proteobacteria	Alphaproteobacteria	Caulobacterales	Caulobacteraceae	PMMR1	NA	CGTTGCTCGGAATTACTGGGCGTAAAGGGCGCGTAGGCGGATGATTAAGTTGGGGGTGAAAGCCCGGGGCTCAACCTCGGAACTGCCTTCAAAACTGGTCATCTTGAGTTCGGGAGAGGTGTGTGGAACTCCGAGTGTAGAGGTGAAATTCGTAGATATTCGGAAGAACACCAGTGGCGAAGGCGACACACTGGCCCGATACTGACGCTGAGGCG
ASV_1001	0	0	0	0	0	0	0	34	0	0	0	0	0	0	0	0	0	0	0	0	0	Bacteria	Acidobacteriota	Acidobacteriae	Acidobacteriales	Acidobacteriaceae (Subgroup 1)	NA	NA	CGTTGTTCGGAATTATTGGGCGTAAAGGGTGCGTAGGTGGTTCGGCAAGTCTCGTGTGAAATCTTCAGGCTCAACTTGAAGTCTGCACGAGAAACTGCCGGGCTTGAGTATGGGAGAGGTGAGTGGAATTTCCGGTGTAGCGGTGAAATGCGTAGATATCGGAAGGAACACCTGTGGCGAAAGCGGCTCACTGGACCATTACTGACACTGAGGCA
ASV_1002	0	0	0	0	0	0	0	0	0	34	0	0	0	0	0	0	0	0	0	0	0	Bacteria	Armatimonadota	Armatimonadia	Armatimonadales	NA	NA	NA	CGTTGTCCGAAGTTACTGGGCGTAAAGAGCGCGTAGGCGGGTTCTTAAGTGAGGGGTGAAAGTCCGAGGCTCAACCTCGGAACTGCCTTTCATACTGGGAACCTTGAGTGCGGGAGAGGCGAGTGGAATGGTCGGTGTAGCGGTGAAATGCGTAGATATCGATCGGAACACCCATGGCGAAGGCAGCTCGCTGGCCTGTAACTGACGCTGAGGCG
ASV_1003	0	0	0	0	0	0	0	0	0	0	0	34	0	0	0	0	0	0	0	0	0	Bacteria	Proteobacteria	Gammaproteobacteria	Xanthomonadales	Rhodanobacteraceae	Mizugakiibacter	NA	GATGTGTAGCCGCCGCGGTAATACGGAGGGTGCAAGCGTTAATCGGAATTACTGGGCGTAAAGCGTGCGTAGGTGGTTCGTTAAGTCCGTTGTGAAAGCCCCGAGCTCAACTTGGGAATTGCAGTGGATACTGATGAGCTGGAGTGCGGTAGAGGAAGGTGGAATTCCCGGTGTAGCGGTGAAATGCGTAGAGATCGGGAGGAACACCAGTGGCG
ASV_1004	0	0	0	0	0	0	0	0	0	0	0	0	0	0	0	0	0	34	0	0	0	Bacteria	Cyanobacteria	Cyanobacteriia	Cyanobacteriales	Nostocaceae	Mastigocladopsis PCC-10914	NA	ATGTGTCAGCGCCGCGGTAATACGGAGGATGCAAGCGTTATCCGGAATGATTGGGCGTAAAGCGTCCGCAGGTGGCAATGTAAGTCTGCTGTCAAAGCGTCTGGCTCAACCAGATACAGGCAGTGGAAACTACATAGCTAGAGTAAGGTAGGGGTAGAGGGAATTCCTGGTGTAGCGGTGAAATGCGTAGAGATCAGGAAGAACACCGGTGGCGA
ASV_1005	0	0	0	0	0	0	0	0	0	0	0	0	0	0	0	0	0	0	0	0	34	Bacteria	Proteobacteria	Alphaproteobacteria	Rhizobiales	Xanthobacteraceae	Pseudolabrys	NA	ATGTGCAGCGCCGCGGTAATACGAAGGGGGCTAGCGTTGCTCGGAATTACTGGGCGTAAAGCGCACGTAGGCGGTTTCTTAAGTCGGGGGTGAAATCCTGGAGCTCAACTCCAGAACTGCCTTCGATACTGGGAAACTTGAGTTCGGGAGAGGTGAGTGGAACTGCGAGTGTAGAGGTGAAATTCGTAGATATTCGCAAGAACACCAGTGGCGAA
ASV_1006	0	0	0	0	0	0	0	0	0	0	0	0	0	34	0	0	0	0	0	0	0	Bacteria	WPS-2	NA	NA	NA	NA	NA	TGTGTCAGCGCCGCGGTAAGACGTAGGGGGCAAGCGTTGTTCGGAATTATTGGGCGTAAAGCGCTCGTAGGCGGGACTGGAAGTCCGTGAAGAAAGACCTGGGCTCAACTCAGGGAACGGCACGGATACTCCAGTTCTTGAGGCAATCAGAGGGTGATGGAATTCCCGGTGTAGCGGTGAAATGCGTAGATATCGGGAGGAACACCAGTGGCGAA
ASV_1007	0	0	0	0	0	0	0	0	0	0	0	0	0	34	0	0	0	0	0	0	0	Bacteria	Actinobacteriota	Actinobacteria	Frankiales	Frankiaceae	Jatrophihabitans	NA	TGTGTCAGCGCCGCGGTAATACGTAGGGTGCAAGCGTTGTCCGGAATTATTGGGCGTAAAGAGCTCGTAGGCGCTTGTCGCGTCGGCTGTGAAAACCTGGGGCTCAACCCCGGGCCTGCAGCCGATACGGGCAAGCTAGAATTCGGTAGGGGAGACTGGAATTCCTGGTGTAGCGGTGAAATGCGCAGATATCAGGAGGAACACCGGTGGCGAAG
ASV_1008	0	0	0	0	0	0	0	33	0	0	0	0	0	0	0	0	0	0	0	0	0	Bacteria	Proteobacteria	NA	NA	NA	NA	NA	CGTTATTCAGAATGATTGGGCGTAAAGGGCATGTAGGCGCTCCTTTAGTTTGTGTGTGAAATGCCAGGGCTTCCCCCTGGGTGTACACCTTTTACTAAGGAGCTTGAGAGAGTGAGAGGAGAGTGGAATTCCTGGAGGAGAGGTAGAATTCAGTGATCTTAGGAAGAAGGCCGAAAGCGAAGGCAATTCTCTGGCACTCTACTGACGCTGAGGTG
ASV_1009	0	0	0	0	0	0	0	33	0	0	0	0	0	0	0	0	0	0	0	0	0	Bacteria	WPS-2	NA	NA	NA	NA	NA	GATGTGCAGCGCCGCGGTAAGACGTAGGGGGCAAGCGTTGTTCGGAATTATTGGGCGTAAAGCGCTCGTAGGCGGGACAGGAAGTCCGTGAAGAAAGACCTGGGCTCAACTCAGGGAACGGCACGGAAACTCTTGTTCTTGAGGCAATCAGAGGATGATGGAATTCCCGGTGTAGCGGTGAAATGCGTAGATATCGGGAGGAACACCAGTGGCGA
ASV_1010	0	0	0	0	0	0	0	0	9	24	0	0	0	0	0	0	0	0	0	0	0	Bacteria	Chloroflexi	SHA-26	NA	NA	NA	NA	CGTTGTCCGGATTTATTGGGCGTAAAGGGCGTGTAGGCGGCCGCGCAAGGGTGGGGTGAAATCTCCCGGCTCAACTGGGAGGGGGCCTGGCCGACTGCGGGGCTGGAGGCCGGTAGGGGCGCGTGGAATTCCCGGTGTAGTGGTGAAATGCGTAGAGATCGGGAGGAACACCGGTGGCGAAGGCGGCGCGCTGGGCCGAGCCTGACGCTGAGGCG
ASV_1011	0	0	0	0	0	0	0	0	27	6	0	0	0	0	0	0	0	0	0	0	0	Bacteria	Chloroflexi	Ktedonobacteria	Ktedonobacterales	Ktedonobacteraceae	1921-2	NA	ATGTGTCAGCGCCGCGGTAAGACGTAGGGGGCGAGCGTTGTCCGGAGTTACTGGGCGTAAAGGGCACGCAGGCGGTCTGCCACGTTGCCATGACAGGGTCGGGCTTCACTCGACCAGGAGGGCAAAAACGAGCGGACTTGAGGCTTGGAGAGGGACCTGGAATTCCGGGTGGAGTGGTGAAATGCGTAGAGATCCGGAGGAACACCGAAGGCGAA
ASV_1012	0	0	0	0	0	0	0	0	0	0	33	0	0	0	0	0	0	0	0	0	0	Bacteria	Actinobacteriota	Actinobacteria	Frankiales	NA	NA	NA	CGTTGTCCGGAATTATTGGGCGTAAAGAGCTCGTAGGCGGTCTGTCGCGTCGGCTGTGAAAACCTGAGGCTCAACCTCGGGCCTGCAGTCGATACGGGCAGACTAGAGTTCGGTAGGGGAGACTGGAATTCCTGGTGTAGCGGTGAAATGCGCAGATATCAGGAGGAACACCGGTGGCGAAGGCGGGTCTCTGGGCCGATACTGACGCTGAGGAG
ASV_1013	0	0	0	0	0	0	0	0	0	0	0	33	0	0	0	0	0	0	0	0	0	Bacteria	Chloroflexi	Chloroflexia	Thermomicrobiales	Thermomicrobiaceae	Sphaerobacter	NA	GATGTGTCAGCGCCGCGGTAAGACGTAGGGTGCAAGCGTTGTCCGGAGTTACTGGGCGTAAAGGGCGCGTAGGCGGTTGCCCCGCGTCGCACGTGAAAGCCCCCGGCTCAACCGGGGAGGGTCGTGCGAGACGGGGCAACTGGAGGCAGGGAGAGGCTGGTGGAATTCCCGGTGTAGTGGTGAAATGCGTAGAGATCGGGAGGAACACCTGAGGC
ASV_1014	0	0	0	0	0	0	0	0	0	0	0	0	0	0	33	0	0	0	0	0	0	Bacteria	Chloroflexi	Ktedonobacteria	Ktedonobacterales	Ktedonobacteraceae	1921-3	NA	CGTTGTCCGGAATTACTGGGCGTAAAGGCACGCAGGTGGTGATGTTAGTGGAGGGTTACAGCTCCTGGCTTAACCAGGAGAGTGCCTGTCCAGACTGCATCGCTTGAGAGCGAGAGAGGGACATGGAATTCCAGGTGGAGCGGTGAAATGCGTAGAGATCTGGAGGAACACCAAAGGCGAAGGCAGTGTCCTGGCTCGTTTCTGACACTCCGGTG
ASV_1016	0	0	0	0	0	0	0	0	0	0	0	0	20	0	0	0	0	13	0	0	0	Bacteria	Acidobacteriota	Acidobacteriae	Bryobacterales	Bryobacteraceae	Bryobacter	NA	CGTTGTTCGGAGTTACTGGGCGTAAAGAGTGTGTAGGCGGTGCTCTAAGTTTGGTGTGAAATCTCCCGGCTCAACTGGGAGGGTGCGCCGAAGACTGGAATGCTTGAGTATGGGAGAGGAAAGCGGAATTCCTGGTGTAGCGGTGAAATGCGTAGATATCAGGAGGAACACCTGCGGTGTAGACGGCTTTCTGGACCATTACTGACGCTGAGACA
ASV_1018	0	0	0	0	0	0	0	0	0	0	0	0	0	33	0	0	0	0	0	0	0	Bacteria	Proteobacteria	Gammaproteobacteria	Gammaproteobacteria Incertae Sedis	Unknown Family	Acidibacter	NA	TGTGTCAGCGCCGCGGTAATACAGAGGGTGCGAGCGTTAATCGGAATTACTGGGCGTAAAGCGTGCGTAGACGGTAATGTAAGTCGGGTGTGAAAGCCCCGGGCTCAACCTGGGAATTGCACTCGAGACTGCATTGCTCGGGTGCGGAAGAGGGAAGCGGAATTTCCGGTGTAGCGGTGAAATGCGTAGATATCGGAAGGAACACCAGTGGCGAA
ASV_1019	0	0	0	0	0	0	0	0	0	0	0	0	0	33	0	0	0	0	0	0	0	Bacteria	Chloroflexi	Chloroflexia	Thermomicrobiales	Thermomicrobiaceae	Sphaerobacter	NA	TGTGTCAGCGCCGCGGTAAGACGTAGGGTGCAAGCGTTGTCCGGAGTTACTGGGCGTAAAGGGCGCGTAGGCGGTTGCCCCGCGTCGCACGTGAAAGCCCCCGGCTCAACCGGGGAGGGTCGTGCGAGACGGGGCAACTGGAGGCAGGGAGAGGCTGGTGGAATTCCCGGTGTAGTGGTGAAATGCGTAGAGATCGGGAGGAACACCTGAGGCGA
ASV_1020	0	32	0	0	0	0	0	0	0	0	0	0	0	0	0	0	0	0	0	0	0	Bacteria	Firmicutes	NA	NA	NA	NA	NA	TACGTAGGATGCAAGCGTTGTCCGGAATTATTGGGCGTAAAGAGCGAGCAGGCGGCATACCAAGTTGGACGTGAAATTTTAGGGCTTAACCCTAAAGGGTCGTCCAAAACTGGTAAGCTAGAGTGCAGGAGAGGAAAGCGGAATTCCCGGTGTAGTGGTGAAATGCGTAGATATCGGGAGGAACACCAGAGGCGAAGGCGGCTTTCTGGCCTGTAACTGACGCTGAGGCGCGAAGGCTGGGGTAGC
ASV_1021	0	0	0	32	0	0	0	0	0	0	0	0	0	0	0	0	0	0	0	0	0	Bacteria	Proteobacteria	Gammaproteobacteria	Gammaproteobacteria Incertae Sedis	Unknown Family	Acidibacter	NA	TGTGCAGCGCCGCGGTAATACAGAGGGTGCGAGCGTTAATCGGAATTACTGGGCGTAAAGCGTGCGTAGACGGTAATGTAAGTCGGGTGTGAAAGCCCCGGGCTCAACCTGGGAATTGCACTCGAGACTGCATTGCTCGGGTGCGGAAGAGGGAAGCGGAATTTCCGGTGTAGCGGTGAAATGCGTAGATATCGGAAGGAACACCAGTGGCGAAA
ASV_1022	0	0	0	0	21	0	0	0	0	0	0	0	0	0	0	0	11	0	0	0	0	Bacteria	Myxococcota	Polyangia	Haliangiales	Haliangiaceae	Haliangium	NA	CGTTGCTCGGAATCATTGGGCGTAAAGCGCACGTAGGTGGCCTGTTAAGTCGGGTGTGAAAGCCCTGGGCTCAACCCAGGAAGTGCACTCGAAACTGGCAGGCTTGAGTACTGAAGAGGGTCGCGGAATTCCCGGTGTAGAGGTGAAATTCGTAGATATCGGGAGGAACACCAGTGGCGAAGGCGGCGACCTGGGCAGATACTGACACTGAGGTG
ASV_1023	0	0	0	0	32	0	0	0	0	0	0	0	0	0	0	0	0	0	0	0	0	Bacteria	Planctomycetota	Planctomycetes	Gemmatales	Gemmataceae	NA	NA	TGTGCAGCGCCGCGGTAAGACGAACCGTGCAAACGTTGTTCGGAATCACTGGGCTTAAAGGGCGCGTAGGCGGCCAGCCAAGTCGGGGGTGAAATCTTTCGGCTCAACCGGAAAAGTGCCTTCGATACTGGCTGGCTGGAGGGAGGTAGGGGCATGTGGAACTTCCGGTGGAGCGGTGAAATGCGTTGATATCGGAAGGAACGCCGGTGGCGAAA
ASV_1024	0	0	0	0	9	0	0	0	6	0	14	0	3	0	0	0	0	0	0	0	0	Bacteria	Armatimonadota	Chthonomonadetes	Chthonomonadales	Chthonomonadaceae	Chthonomonas	NA	CGTTGTCCGAAGTACTGGGCGTAAAGCGCGCGTAGGCGGGTAAGCAAGTCTGCTGTGAAAGCCCGGAGCTTAACTCCGGAGGGTCGGTGGATACTGCTTGTCTTGAAGTGGCTAGGGGGAGATGGAATTACCGGTGTAGCGGTGAAATGCGTAGAGATCGGTAGGAACACCAGTGGCGAAGGCGGTCTCCTGGGGCTCACTTGACGCTGAGGCGC
ASV_1025	0	0	0	0	0	12	8	0	0	0	0	0	0	12	0	0	0	0	0	0	0	Bacteria	Proteobacteria	Alphaproteobacteria	Rhizobiales	Rhizobiaceae	Aminobacter	NA	CGTTGTTCGGAATTACTGGGCGTAAAGCGCACGTAGGCGGATTGTTAAGTTAGGGGTGAAATCCCAGGGCTCAACCCTGGAACTGCCTTTAATACTGGCAATCTAGAGTCCGAGAGAGGTGAGTGGAATTCCGAGTGTAGAGGTGAAATTCGTAGATATTCGGAGGAACACCAGTGGCGAAGGCGGCTCACTGGCTCGGTACTGACGCTGAGGTG
ASV_1026	0	0	0	0	0	0	32	0	0	0	0	0	0	0	0	0	0	0	0	0	0	Bacteria	Actinobacteriota	Actinobacteria	Frankiales	Frankiaceae	Frankia	NA	CGTTGTCCGGAATTATTGGGCGTAAAGAGCTCGTAGGCGGCCTGTCGCGTCGGCTGTGAAAACCCAGGGCTCAACCCTGGGCCTGCAGTCGATACGGGCAGGCTAGAGTCCGGCAGGGGAGACTGGAATTCCTGGTGTAGCGGTGAAATGCGCAGATATCAGGAGGAACACCGGTGGCGAAGGCGGGTCTCTGGGCCGGAACTGACGCTGAGGAG
ASV_1027	0	0	0	0	0	0	0	0	9	0	0	0	0	0	0	0	8	15	0	0	0	Bacteria	Acidobacteriota	Acidobacteriae	Solibacterales	Solibacteraceae	Candidatus Solibacter	NA	ATGTGTCAGCGCCGCGGTAATACGTAGGCAGCGAGCGTTGTTCGGAGTTACTGGGCGTAAAGGGTGTGTAGGCGGTTCTCTAAGTTTGGTGTGAAATCTCCCGGCTCAACCGGGAGGGTGCGCCGAAAACTGGAGAGCTAGAGTGCGGGAGGGGAGAGTGGAATTCCTGGTGTAGCGGTGAAATGCGTAGATATCAGGAGGAACACCGGTGGTGT
ASV_1028	0	0	0	0	0	0	0	0	0	32	0	0	0	0	0	0	0	0	0	0	0	Bacteria	Chloroflexi	Ktedonobacteria	Ktedonobacterales	Ktedonobacteraceae	FCPS473	NA	ATGTGTCAGCGCCGCGGTAAGACGTAGGGAGCGAGCGTTGTCCGGAGTTACTGGGCGTAAAGGGCACGCAGGCGGTCGGTCGCGTTGCCACTGACAGCCGTCGGCTTAACTGACGGAGGTGGGGCAAAACGGGCCGACTTGAGGCTCAGAGAGGCAGACGGAATTCCGCGTGGAGCGGTGAAATGCGTAGAGATGCGGAAGAACACCAAAGGCGA
ASV_1029	0	0	0	0	0	0	0	0	0	0	0	0	0	0	0	0	16	16	0	0	0	Bacteria	Acidobacteriota	Holophagae	Subgroup 7	NA	NA	NA	ATGTGCAGCGCCGCGGTAATACAGAGGGGGCCAGCGTTATTCGGAATTATTGGGCGTAAAGGGCGCGTAGGCGGCCATGCGTGTCTTCCGTGAAATCCCTCGGCTTAACTGAGGACGTGCGGAAGAAACTGCAAGGCTTGAGTCCGGGAGAGGGGGGTGGAATTCCCAGTGTAGCGGTGAAATGCGTAGATATTGGGAGGAACACCGGTGGCGAA
ASV_1030	0	0	0	0	0	0	0	0	0	0	0	0	0	0	0	0	0	32	0	0	0	Bacteria	Chloroflexi	Ktedonobacteria	Ktedonobacterales	Ktedonobacteraceae	NA	NA	ATGTGTCAGCGCCGCGGTAATACGTAGGGGGCGAGCGTTGTCCGGATTTATTGGGCGTAAAGGGCACGCAGGCGGTCTGCGCATTCGCGGTGACAGTTTTCGGCTTCCCTGAGAAAGGGTCGCGACGATGGGCAGACTTGAGGACCAGAGAGGAAACGGGAACTCCGGGTGGAGTGGTGAAATGCGTAGATATCCGGAAGAACACCCATGGCGAA
ASV_1031	0	0	0	0	0	0	0	0	0	0	0	0	0	0	0	0	0	0	32	0	0	Bacteria	NA	NA	NA	NA	NA	NA	ATGTGTCAGCGCCGCGGTAATACGTAGGGCCCGAGCGTTACCCGGATTTACTGGGCGTAAAGGGTCCGCAGGCGCCCGGCAAGTCGGGCGTGAAATCCCTCGGCTTAACCGAGGAACGGCGTCCGATACTACCGGGCTTGAGGACGGGAGAGGGAGGTGGAATTCCCGGAGTAGCGGTGAAATGCGTAGATACCGGGAGGAACACCGGTGGCGAA
ASV_1032	0	0	0	0	0	0	0	0	0	0	0	0	0	0	0	0	0	0	18	0	14	Bacteria	Armatimonadota	Chthonomonadetes	Chthonomonadales	Chthonomonadaceae	Chthonomonas	NA	ATGTGTCAGCGCCGCGGTAAGACGGAGGGGGCGAGCGTTGTCCGGATTTACTGGGCGTAAAGGGCGCGTAGGCGGGCTAGAGGGTCTGCTGTGAAATTTTGGGGCTCAGCCCCAAGTTGTCGGCAGAAACCGCTAGTCTTGAAGCAGCTAGGGGGAGATGGAATTACCGGTGGAGCGGTGAAATGCGTAGAGATCGGTAGGAACACCCGTGGCGA
ASV_1033	0	0	0	0	0	0	0	0	0	0	0	0	0	0	0	0	0	0	0	32	0	Bacteria	GAL15	NA	NA	NA	NA	NA	GATGTGCAGCGCCGCGGTAAGACGTAGGGGGCGAGCGTTGTCCGGAATCACTGGGCGTAAAGCGCGTGTAGGCGGTTCGGTAAGTCCCGTGTGAAAGCCTACGGCTCAACTGTAGGAGGCCGCGGGATACTGCCGGGCTGGAGGACGGGAGAGGGAAGTGGAATTCCCGGTGTAGCGGTGAAATGCGTAGATATCGGGAGGAACGCCAGTGGCGA
ASV_1034	0	0	0	0	0	0	0	0	0	0	0	0	0	0	0	0	0	0	0	32	0	Bacteria	Proteobacteria	Alphaproteobacteria	Rhizobiales	Beijerinckiaceae	Methylocystis	NA	CGTTGTTCGGAATCACTGGGCGTAAAGCGCACGTAGGCGGATTTTTAAGTCAGGGGTGAAATCCCGAGGCTCAACCTCGGAACTGCCTTTGATACTGGGAATCTTGAGTCCGGGAGAGGTGAGTGGAACTGCGAGTGTAGAGGTGAAATTCGTAGATATTCGCAAGAACACCAGTGGCGAAGGCGGCTCACTGGCCCGGTACTGACGCTGAGGTG
ASV_1035	31	0	0	0	0	0	0	0	0	0	0	0	0	0	0	0	0	0	0	0	0	Bacteria	Chloroflexi	Chloroflexia	Thermomicrobiales	JG30-KF-CM45	NA	NA	TACGTAGGGGCCGAGCGTTGTCCGGAGTTACTGGGCGTAAAGCGCGCGTAGGCGGCCTGGGAAGCCTGACGTGAAAGCCCCCGGCTCAACCGGGGAGGGTCGTCGGGGACTTTCAGGCTTGAGGGGGGCAGAGGCCGGTGGAATGCCCGGTGTAGTGGTGAAATGCGTAGAGATCGGGCAGAACACCCGTGGCGAAGGCGGCCGGCTGGGCCGGTCCTGACGCTGAGGCGCGAAGGCGTGGGGAGC
ASV_1036	0	31	0	0	0	0	0	0	0	0	0	0	0	0	0	0	0	0	0	0	0	Bacteria	Verrucomicrobiota	Verrucomicrobiae	Chthoniobacterales	Chthoniobacteraceae	Candidatus Udaeobacter	NA	TACAGAGGTCTCAAGCGTTGTTCGGATTCATTGGGCGTAAAGGGTGCGTAGGCGGCGCGGTAAGTCGGGTGTGAAATCTCGGAGCTTAACTCCGAAACTGCATTCGATACTGCCGCGCTCGAGGACTGGAGAGGAGACTGGAATTCACGGTGTAGCGGTGAAATGCGTAGATATCGTGAGGAAGACCAGTGGCGAAGGCGGGTCTCTGGACAGTTCCTGACGCTGAGGCACGAAGGCCAGGGGAGC
ASV_1037	0	0	11	0	0	20	0	0	0	0	0	0	0	0	0	0	0	0	0	0	0	Bacteria	Proteobacteria	Alphaproteobacteria	Rhizobiales	Rhizobiales Incertae Sedis	Alsobacter	NA	CGTTGCTCGGAATCACTGGGCGTAAAGCGCACGTAGGCGGATCTTTAAGTCAGGGGTGAAATCCCAAGGCTCAACCTTGGAACTGCCTTTGATACTGGGGATCTCGAGTCCGGAAGAGGTTGGTGGAACTCCGAGTGTAGAGGTGAAATTCGTAGATATTCGGAAGAACACCAGTGGCGAAGGCGGCCAACTGGTCCGGCACTGACGCTGAGGTG
ASV_1038	0	0	0	31	0	0	0	0	0	0	0	0	0	0	0	0	0	0	0	0	0	Bacteria	Proteobacteria	Gammaproteobacteria	Gammaproteobacteria Incertae Sedis	Unknown Family	Acidibacter	NA	CGTTAATCGGAATTACTGGGCGTAAAGCGTGCGTAGACGGTCATGTAAGTCGGATGTGAAAGCCCCGGGCTCAACCTGGGAATTGCATTCGAGACTGCAAGGCTTGGGTGCGGAAGAGGGAAGCGGAATTTCCGGTGTAGCGGTGAAATGCGTAGATATCGGAAGGAACACCAGTGGCGAAAGCGGACTTCCTGGTCCGACACCGACGTTCAGGC
ASV_1039	0	0	0	0	31	0	0	0	0	0	0	0	0	0	0	0	0	0	0	0	0	Bacteria	Gemmatimonadota	Gemmatimonadetes	Gemmatimonadales	Gemmatimonadaceae	NA	NA	CGTTGTCCGGAATCACTGGGCGTAAAGGGCGCGTAGGTGGCGGGATAAGCGTGTGGTGAAAGCTCGGAGCTCAACTCCGAGTCTGCCATGCGGACTGTCTTGCTCGAGCGTAGTAGAGGCAGGTGGAATTCCGGGTGTAGCGGTGGAATGCGTAGAGATCCGGAAGAACACCGGTGGCGAAGGCGGCCTGCTGGGCTACTGGCTGACACTGAGGC
ASV_1040	0	0	0	0	0	31	0	0	0	0	0	0	0	0	0	0	0	0	0	0	0	Bacteria	Chloroflexi	Anaerolineae	NA	NA	NA	NA	GTGTCAGCGCCGCGGTAATACGTAGGTTGCAAGCGTTATTCGGATTTACTGGGCGTAAAGCGCACCGAGGTGGCTTCTTAAGTTGGATGTAAAATCTCCCGGCTTAACTGGGAGGCGCCATTCAAAACTGAGGAGCTTGAGGTCAGCAGGGGAAAGTGGAATTCCCGGTGTAGTGGTGGAATGCGTAGAGATCGGGAGGAACACCAGTGGCGAAA
ASV_1042	0	0	0	0	0	0	0	31	0	0	0	0	0	0	0	0	0	0	0	0	0	Bacteria	WPS-2	NA	NA	NA	NA	NA	CGTTGTTCGGAATTATTGGGCGTAAAGCGCTCGTAGGCGGGACGGGAAGTCCGTGAAGAAAGACCTGGGCTCAACTCAGGGAACGGCACGGATACTCTTGTTCTTGAGGCAATCAGAGGGTGATGGAATTCCCGGTGTAGCGGTGAAATGCGTAGATATCGGGAGGAACACCAGTGGCGAAGGCGATCACCTGGGGTTGTTCTGACGCTGAGGAG
ASV_1043	0	0	0	0	0	0	0	0	0	31	0	0	0	0	0	0	0	0	0	0	0	Bacteria	Firmicutes	Bacilli	Lactobacillales	Carnobacteriaceae	Atopostipes	NA	CGTTGTCCGGAATTATTGGGCGTAAAGGGAGCGCAGGCGGTTGGAATAGTCTGATGTGAAAGCCCACGGCTTAACCGTGGAAGGTCATTGGAAACTGTCCAACTTGAATGCAGAAGAGGAAAGTGGAATTCCATGTGTAGCGGTGAAATGCGTAGATATATGGAGGAACACCAGTGGCGAAGGCGACTTTCTGGTCTGTAATTGACGCTGAGGCT
ASV_1044	0	0	0	0	0	0	0	0	0	0	7	0	24	0	0	0	0	0	0	0	0	Bacteria	Planctomycetota	Planctomycetes	Isosphaerales	Isosphaeraceae	NA	NA	CGTTATTCGGAATCACTGGGCTTAAAGCGCGTGTAGGCGGCCGGCACGTCGGTCGCTGAAAGCCCCCGGCTCAACCGGGGAAGGGGCGCCGATACGACCGGCCTGGAGGGGGGTAGGGGGAGCCGGAACTTCCGGTGGAGCGGTGAAATGCGTTGAGATCGGAAGGAACGCCCGTGGCGAAAGCGGGCTCCTGGACCTTACCTGACGCTGAGACG
ASV_1045	0	0	0	0	0	0	0	0	0	0	0	0	0	0	0	0	23	8	0	0	0	Bacteria	NA	NA	NA	NA	NA	NA	CGTTGTTCGGAATCATTGGGCGTAAAGCGCGTGCAGGCTGTTAGCTAAGTCGGGTGTGAAATCCCTCGGCTCAACCGAGGAAGTGCATCCGAAACTAACTAGCTAGAGAATGGTAGAGGAAGGTGGAATTCCTAGTGTAGAGGTGAAATTCGTAGATATTAGGAGGAATACCGGTGGCGAAGGCGGCCTTCTGGACCATTTCTGACGCTGAGACG
ASV_1046	0	0	0	0	0	0	0	0	0	0	0	0	0	0	0	0	31	0	0	0	0	Bacteria	Planctomycetota	Planctomycetes	Isosphaerales	Isosphaeraceae	NA	NA	CGTTATTCGGAATCACTGGGCTTAAAGCGCGTGTAGGCGGCCCGGCACGTCGAGCGTTGAAAGCCCCCGGCTCAACCGGGGAAGCGGCCTCGATACGACCGGGCTGGAGGGGGGTAGGGGGAGCCGGAACTTCCGGTGGAGCGGTGAAATGCGTTGAGATCGGAAGGAACGCCCGCGGCGAAAGCGGGCTCCTGGACCCCGCCTGACGCTGAGAC
ASV_1047	30	0	0	0	0	0	0	0	0	0	0	0	0	0	0	0	0	0	0	0	0	Bacteria	NA	NA	NA	NA	NA	NA	TACGGAGGGTGCGAGCGTTACCCGGATTTACTGGGCGTAAAGCGCGCGTAGGTGGGGCCTTAAGTCGGGCGTGAAAGCCCCTGGCTCAACTGGCGGAGGCCGTCCGAAACCGTCGGGCTTGAGCACCGGAGAGGGACGTGGAATTCCCGGTGGAGCGGTGAAATGCGTAGAGATCGGGAGGAACACCAGTGGGGAAGCCGGCCACCTGGCTCGTTCCTGACACTGAGGCGCGAAAGCGTGGGGAGC
ASV_1048	0	30	0	0	0	0	0	0	0	0	0	0	0	0	0	0	0	0	0	0	0	Bacteria	Actinobacteriota	Acidimicrobiia	NA	NA	NA	NA	TACGTAGGGGGTAAGCGTTGTCCGGATTTATTGGGCGTAAAGAGCTCGTAGGCGGCTTGGCAAGTCGGATGTGAAACCTCCAGGCTCAACCTGGAGCCGCCATTCGATACTGCCATGGCTAGAGTTTGGTAGGGGACCACGGAATTCCTGGTGTAGCGGTGAAATGCGCAGATATCAGGAGGAACGCCAGTGGCGAAGGCGGCTTCCTGGCCTGTCCCTGACGCTGAGACGCGAAAGCTGGGGGAG
ASV_1049	0	30	0	0	0	0	0	0	0	0	0	0	0	0	0	0	0	0	0	0	0	Bacteria	Proteobacteria	Gammaproteobacteria	Xanthomonadales	Rhodanobacteraceae	Mizugakiibacter	NA	TACGTAGGGGGCAAGCGTTACCCGGAATTACTGGGCGTAAAGCGTGCGTAGGTGGTTCGCTAAGTCCGTTGTGAAAGCCCCGAGCTCAACTTGGGAATGGCAGTGGATACTGGCGAGCTGGAGTGCGGTAGAGGAAGGTGGAATTCCCGGTGTAGCGGTGAAATGCGTAGAGATCGGGAGGAACACCAGAGGCGAAGGCGGCTTCCTGGCCTGAACCTGACACTGAGACGCGAAAGCGTGGGGAGC
ASV_1050	0	0	0	0	30	0	0	0	0	0	0	0	0	0	0	0	0	0	0	0	0	Bacteria	Chloroflexi	Ktedonobacteria	Ktedonobacterales	Ktedonobacteraceae	NA	NA	CGTTGTCCGGAGTTACTGGGCGTAAAGCGCCCGCAGGCGGTCAGGTAAGTTCAGACTGACAATCCCCAGCTTAACTGGGGAGGGTGTATGAAAACTGCGTGACTTGAGGGACAGAGAGGGACATGGAATTCCGGGTGGAGTGGTGAAATGCGTAGATATCCGGAGGAACACCAAAGGCGAAGGCAATGTCCTGGCTGTTACCTGACGCTGAGGGG
ASV_1051	0	0	0	0	0	5	0	3	0	0	0	0	0	22	0	0	0	0	0	0	0	Bacteria	Acidobacteriota	Blastocatellia	Blastocatellales	Blastocatellaceae	Blastocatella	NA	CGTTGTTCGGATTTACTGGGCGTAAAGGGAGCGTAGGCGGCAATTCAAGTCAGTTGTGAAATCTCCGAGCTTAACTCGGAACGGTCAACTGATACTGTTTTGCTAGAGTACAGAAGGGGCAATCGGAATTCTTGGTGTAGCGGTGAAATGCGTAGATATCAAGAGGAACACCTGAGGTGAAGACGGGTTGCTGGGCTGATACTGACGCTGAGGCT
ASV_1052	0	0	0	0	0	0	21	2	0	0	0	7	0	0	0	0	0	0	0	0	0	Bacteria	Firmicutes	Bacilli	Alicyclobacillales	Alicyclobacillaceae	Tumebacillus	permanentifrigoris	CGTTGTCCGGATTCACTGGGCGTAAAGCGCGCGCAGGCGGTTTCTCACGTCCGGGGTGAAAGCCCAGAGCTCAACTCTGGGATTGCCTTGGATACGGGGAGACTTGAGGATCGGAGAGGCAAGGGGAATTCCACGTGTAGCGGTGAAATGCGTAGAGATGTGGAGGAACACCTGTGGCGAAGGCGCCTTGCTGGCCGATTTCTGACGCTGAGGCG
ASV_1053	0	0	0	0	0	0	0	0	0	16	0	0	0	0	0	0	0	14	0	0	0	Bacteria	Actinobacteriota	Acidimicrobiia	IMCC26256	NA	NA	NA	CGTTGTCCGGATTTATTGGGCGTAAAGAGCTCGTAGGCGGTTCGGTAAGTCGGATGTGAAATCTCCACGCTCAACGTGGAGGGGCCATTCGATACTGCCGTGACTCGAGTCCGGTAGGGGAGTGTGGAATTCCCGGTGTAGCGGTGAAATGCGCAGAGATCGGGAGGAACACCCGTAGCGAAGGCGGCACTCTGGGCCGGTACTGACGCTGAGGA
ASV_1054	0	0	0	0	0	0	0	0	0	12	0	0	0	0	18	0	0	0	0	0	0	Bacteria	Gemmatimonadota	Gemmatimonadetes	Gemmatimonadales	Gemmatimonadaceae	NA	NA	CGTTGTCCGGAATCACTGGGCGTAAAGGGCGCGTAGGCGGCCTGATAAGTAGGGGGTGAAATCCCGTGGCTCAACCGCGGGGCTGCCTTCTAGACTGTCGGGCTAGAGCACGGTAGAGGCGGATGGAATTCCCGGTGTAGCGGTGGAATGCGTAGAGATCGGGAAGAACACCGGTGGCGAAGGCGGTCCGCTGGGCCGTTGCTGACGCTGAGCGC
ASV_1056	0	0	0	0	0	0	0	0	0	0	0	0	0	0	0	0	0	30	0	0	0	Bacteria	Actinobacteriota	Actinobacteria	Corynebacteriales	Mycobacteriaceae	Mycobacterium	NA	CGTTGTCCGGAATTACTGGGCGTAAAGAGCTCGTAGGTGGTTTGTCGCGTTGTTCGTGAAATCTCACGGCTTAACTGTGAGCGTGCGGGCGATACGGGCAGACTTGAGTACTGCAGGGGAGACTGGAATTCCTGGTGTAGCGGTGGAATGCGCAGATATCAGGAGGAACACCGGTGGCGAAGGCGGGTCTCTGGGCAGTAACTGACGCTGAGGAG
ASV_1057	0	0	0	0	0	0	0	0	0	0	0	0	0	0	0	0	0	0	0	30	0	Bacteria	Armatimonadota	Chthonomonadetes	Chthonomonadales	Chthonomonadaceae	Chthonomonas	NA	GATGTGCAGCGCCGCGGTAAGACGGAGGGGGCGAGCGTTGTCCGGATTTACTGGGCGTAAAGGGCGCGTAGGCGGGCTAGAGGGTCTGCTGTGAAATTTTGGGGCTCAGCCCCAAGTTGTCGGCAGAAACCGCTAGTCTTGAAGCAGCTAGGGGGAGATGGAATTACCGGTGGAGCGGTGAAATGCGTAGAGATCGGTAGGAACACCCGTGGCGA
ASV_1058	0	0	0	0	0	0	0	0	0	0	0	0	0	30	0	0	0	0	0	0	0	Bacteria	Actinobacteriota	Acidimicrobiia	NA	NA	NA	NA	CGTTGTCCGGATTTATTGGGCGTAAAGAGCTCGTAGGCGGCTTGGCAAGTCGGGTGTGAAACCTCCAGGCTCAACCTGGAGTCGCCATTCGATACTGCTATGGCTTGAGTTTGGTAGGGGACCACGGAATTCCTGGTGTAGCGGTGAAATGCGCAGATATCAGGAGGAACACCAGCGGCGAAGGCGGTGGTCTGGGCCAATACTGACGCTGAGGA
ASV_1059	0	0	0	0	0	0	0	0	0	0	0	0	0	30	0	0	0	0	0	0	0	Archaea	Crenarchaeota	Nitrososphaeria	Nitrososphaerales	Nitrososphaeraceae	Candidatus Nitrososphaera	NA	TGTGTCAGCGCCGCGGTAATACCAGCACCCCGAGTGGTCGGGACGATTATTGGGCCTAAAGCATCCGTAGCCTGTCCTGCAAGTCTTCCGTTAAATCCACCTGCTTAACAGATGGGCCGCGGAGGATACTACAGGGCTAGGAGGCGGGAGAGGCAAACGGTACTCAGTGGGTAGGGGTAAAATCCACTGATCCACTGAAGACCACCAGTGGCGAA
ASV_1060	29	0	0	0	0	0	0	0	0	0	0	0	0	0	0	0	0	0	0	0	0	Bacteria	Chloroflexi	Chloroflexia	Thermomicrobiales	Thermomicrobiaceae	Nitrolancea	NA	GACGTAGGGTGCAAGCGTTGTCCGGAGTTACTGGGCGTAAAGGGCGCGTAGGCGGTTGCCCCGCGTCGCACGTGAAAGCCCCCGGCTCAACCGGGGAGGGTCGTGCGAGACGGGGCAACTGGAGGCAGGGAGAGGCTGGTGGAATTCCCGGTGTAGTGGTGAAATGCGTAGAGATCGGGAGGAACACCTGAGGCGAAGGCGCCAGCTGGCCCTGTCCTGACGCTGAGGCGCGAAGGCTCGGGGAGC
ASV_1061	29	0	0	0	0	0	0	0	0	0	0	0	0	0	0	0	0	0	0	0	0	Bacteria	Planctomycetota	Planctomycetes	Gemmatales	Gemmataceae	NA	NA	GACGAACCGTGCGAACGTTGTTCGGAATCACTGGGCTTAAAGGGCGCGTAGGCGGGTCAGCCAGTTCGGGGTGAAATCCTTCGGCTTAACCGGAGAACTGCCTCGAAGACGACTGATCTGGAGGGAGGTAGGGGTCGCTGGAACTTCCGGTGGAGCGGTGAAATGCGTTGATATCGGAAGGAACGCCGGTGGCGAAAGCGAGCGACTGGACCTTTACTGACGCTGAGGCGCGAAAGCTAGGGGAGC
ASV_1062	0	0	0	0	10	0	0	0	0	0	0	0	0	0	0	0	0	0	0	19	0	Bacteria	Cyanobacteria	Vampirivibrionia	Obscuribacterales	Obscuribacteraceae	Candidatus Obscuribacter	NA	CGTTGTCCGGATTTATTGGGCGTAAAGAGTTCGTAGGTGGTTTGTTAAGTTTGGTGTTAAAGATTGGGGCTCAACCCTGAAACTGCACTGAATACTGGCAGACTCGAGTGTGGTAGAGGCTAGTGGAATTCCCAGTGTAGCGGTGAAATGCGTAGATATTGGGAAGAACACCGGTGGCGTAGGCGACTAGCTGGGCCATAACTGACACTGAGGAA
ASV_1063	0	0	0	0	29	0	0	0	0	0	0	0	0	0	0	0	0	0	0	0	0	Bacteria	Myxococcota	Polyangia	mle1-27	NA	NA	NA	CGTTGTTCGGAATTACTGGGCGTAAAGCGCGTGTAGGCGGCAAGGCAAGTCGGGTGTGAAAGCCCTGGGCTCAACCCAGGAAGTGCATTCGATACTGCCAAGCTGGAGTCCCGGAGAGGATGGTGGAACTCTCGGTGTAGAGGTGAAATTCGTAGATATCGAGAAGAACACCGGTGGCGAAGGCGGCCATCTGGACGGTGACTGACGCTGAGACG
ASV_1064	0	0	0	0	13	0	0	0	0	16	0	0	0	0	0	0	0	0	0	0	0	Archaea	Crenarchaeota	Nitrososphaeria	Nitrososphaerales	Nitrososphaeraceae	Candidatus Nitrososphaera	NA	TGGTCGGGACGATTATTGGGCCTAAAGCATCCGTAGCCGGTTCTGCAAGTCTTCCGTTAAATCCACCTGCTCAACAGATGGGCTGCGGGAGATACTACAGGGCTAGGAGGCGGGAGAGGCAAGCGGTACTCAGTGGGTAGGGGTAAAATCCTCTGATCCACTGAAGACCACCAGTGGCGAAGGCGGCTTGCCAGAACGCGCTCGACGGTGAGGGA
ASV_1065	0	0	0	0	0	16	0	0	0	0	0	0	0	13	0	0	0	0	0	0	0	Bacteria	Actinobacteriota	Actinobacteria	Micrococcales	Intrasporangiaceae	Terrabacter	NA	CGTTGTCCGGAATTATTGGGCGTAAAGAGCTTGTAGGTGGTTTGTCGCGTCTGCTGTGAAAATCCGAGGCTCAACCTCGGACTTGCAGTGGGTACGGGCAGACTAGAGTGTGGTAGGGGAGACTGGAATTCCTGGTGTAGCGGTGGAATGCGCAGATATCAGGAGGAACACCGATGGCGAAGGCAGGTCTCTGGGCCATTACTGACACTGAGAAG
ASV_1066	0	0	0	0	0	0	0	7	0	0	9	0	0	13	0	0	0	0	0	0	0	Archaea	Crenarchaeota	Nitrososphaeria	Group 1.1c	NA	NA	NA	TGGTCGGGGCGATTATTGGGCCTAAAGCATCCGTAGCCGGTTCCGTAGGTCTTCTGTCAAATCCAACGGCTCAACCGTTGGCCCGCAGAAGATACCGCGGGACTAGGAGGCGGGAGAGGTGGGCGGTACTCCACGTGTAGGGGTAAAATCCTTTGATCCGTGGAAGACCACCAGTGGCGAAGGCGGCCCACCAGAACGCGCTCGACGGTGAGGGA
ASV_1067	0	0	0	0	0	0	0	0	29	0	0	0	0	0	0	0	0	0	0	0	0	Bacteria	Chloroflexi	Ktedonobacteria	Ktedonobacterales	JG30-KF-AS9	NA	NA	CGTTGTCCGGAGTTATTGGGCGTAAAGGGTGCGCAGGCGGCCCCGCGCGTGGACAGGTGAAAGCTCCTGGCTCAACTAGGAGAGGTGTGTCCAGACGGCGGGGCTTGAGGGTCGTAGAGGGGCGTGGAACTCCGGGTGGAGCGGTGAAATGCGTAGAGATCCGGAAGAACACCGACGGCGTAAGCAGCGCCCTGGGCGACACCTGACGCTCAGGC
ASV_1068	0	0	0	0	0	0	0	0	0	21	0	0	0	0	8	0	0	0	0	0	0	Bacteria	Actinobacteriota	Acidimicrobiia	IMCC26256	NA	NA	NA	ATGTGCAGCGCCGCGGTAATACGTAGGGGGCGAGCGTTGTCCGGATTCATTGGGCGTAAAGAGCTCGTAGGCGGTTTGGTGAGTCGGGTGTGAAATCTCCACGCTCAACGTGGAGGGGCCACCCGATACTGCCATGACTCGAGTCCGGTAGAGGAGTGTGGAATTCCCGGTGTAGCGGTGAAATGCGCAGATATCGGGAGGAACACCCGTAGCGA
ASV_1069	0	0	0	0	0	0	0	0	0	0	19	0	0	0	0	0	0	10	0	0	0	Bacteria	Chloroflexi	Chloroflexia	Elev-1554	NA	NA	NA	CGTTGTCCGGAATTACTGGGCGTAAAGAGCGCGTAGGCGGCCCGTTGCGTAGGCGGTGAAAGCCCCCGGCTCACCTGGGGGAGTGCCGCCTAAACGGGTGGGCTAGAGGGCGGTAGGGGCTGGCGGAACGCCCGGAGTAGCGGTGAAATGCGTTGAGATCGGGCAGAACACCAGTGGCGAAGGCGGCCGGCTGGGCCGCACCTGACGCTGAGGCG
ASV_1070	0	0	0	0	0	0	0	0	0	0	4	0	25	0	0	0	0	0	0	0	0	Bacteria	Dependentiae	Babeliae	Babeliales	Babeliaceae	NA	NA	CGTTATTCGGATTTATTGGGCGTAAAGGGTGCGCAGGCGGCATGCTAAGTCAACTGTCTAATTTCCCAGCCTAACTGGGAGCCGGCGGTAGATACTGGTGTGCTAGAGGATGGAAGAGAGAAGTGGAATTCTTGGAGTAGCGGTAAAATGCGTAGATCTCAAGAGGAACACCGATGGCGAAGGCAGCTTCTTGGTCCATATCTGACGCTCATGCA
ASV_1071	0	0	0	0	0	0	0	0	0	0	0	29	0	0	0	0	0	0	0	0	0	Bacteria	Armatimonadota	Chthonomonadetes	Chthonomonadales	Chthonomonadaceae	Chthonomonas	NA	GATGTGTCAGCGCCGCGGTAAGACGGAGGGGGCGAGCGTTGTCCGGATTTACTGGGCGTAAAGGGCGCGTAGGCGGGCTAGAGGGTCTGCTGTGAAATTTTGGGGCTCAGCCCCAAGTTGTCGGCAGAAACCGCTAGTCTTGAAGCAGCTAGGGGGAGATGGAATTACCGGTGGAGCGGTGAAATGCGTAGAGATCGGTAGGAACACCCGTGGCG
ASV_1072	0	0	0	0	0	0	0	0	0	0	0	0	0	0	0	13	0	16	0	0	0	Bacteria	Myxococcota	Polyangia	Polyangiales	Polyangiaceae	Pajaroellobacter	NA	CGTTGTTCGGAATTACTGGGCGTAAAGCGTGTGTAGGCGGTCCGCTAAGTCGGGTGTGAAATCCCTGGGCTCAACCCAGGAAGTGCACTCGAAACTGGCGGGCTAGAGTATCGGAGAGGTTGGTGGAATTCTCGGTGTAGAGGTGAAATTCGTAGATATCGAGAGGAACACCGGTGGCGAAGGCGGCCAACTGGACGAATACTGACGCTGAGACA
ASV_1073	0	0	0	0	0	0	0	0	0	0	0	0	0	0	0	0	29	0	0	0	0	Bacteria	Planctomycetota	Planctomycetes	Gemmatales	Gemmataceae	NA	NA	CGTTGTTCGGAATCACTGGGCTTAAAGGGCGCGTAGGCGGTTCTCCCAGTCCGGGGTGAAAGCGCTCGGCTTAACCGGGCCAGTGCCTTGGATACTGGAGAACTCGAGGGAGATAGGGGCAGGTGGAACTTCCGGTGGAGCGGTGAAATGCGTTGATATCGGAAGGAACGCCGGTGGCGAAAGCGGCCTGCTGGATCTCCACTGACGCTGAGCGC
ASV_1074	0	0	0	0	0	0	0	0	0	0	0	0	4	0	0	0	0	11	0	0	14	Bacteria	Bacteroidota	Bacteroidia	Chitinophagales	Chitinophagaceae	NA	NA	CGTTATCCGGATTCACTGGGTTTAAAGGGTGCGTAGGTGGGTTGGTAAGTCAGTGGTGAAATCTCCGGGCTTAACCCGGAAACTGCCATTGATACTATCAGTCTTGAATACCTTGGAGGTGAGCGGAATATGTCATGTAGCGGTGAAATGCTTAGATATGACATAGAACACCAATTGCGAAGGCAGCTCACTACACGGTCATTGACACTGAGGCA
ASV_1075	0	0	0	0	0	0	0	0	0	0	0	0	0	0	0	0	0	29	0	0	0	Bacteria	Chloroflexi	JG30-KF-CM66	NA	NA	NA	NA	CGTTGTCCGGATTTATTGGGCGTAAAGCGCGCGCAGGTGGTGCGGTAAGTCTGCCGTGAAATCTCCCGGCTCAACTGGGAGGCTGCGGTGGAGACTGCCACACTTGAGGTACCTAGAGGTCGGTGGAATTCCCGGTGTAGTGGTGAAATGCGTAGAGATCGGGAGGAACACCAGTGGCGAAGGCGGCCGGCTGGGGGTGACCTGACGCTGAGGCG
ASV_1076	0	0	0	0	0	0	0	0	0	0	0	0	0	0	0	0	0	0	0	29	0	Bacteria	Proteobacteria	Alphaproteobacteria	Rhizobiales	Beijerinckiaceae	Methylovirgula	NA	GATGTGTCAGCGCCGCGGTAATACGAAGGGGGCTAGCGTTGTTCGGAATCACTGGGCGTAAAGCGCACGTAGGCGGATCCTTAAGTCAGGGGTGAAATCCCGAGGCTCAACCTCGGAACTGCCTTTGATACTGGGGATCTCGAGTCCGGGAGAGGTGAGTGGAATTGCGAGTGTAGAGGTGAAATTCGTAGATATTCGCAAGAACACCAGTGGCG
ASV_1077	0	0	0	0	0	0	0	0	0	0	0	0	29	0	0	0	0	0	0	0	0	Bacteria	Proteobacteria	Alphaproteobacteria	Rhizobiales	Methyloligellaceae	NA	NA	CGTTGTTCGGAATTACTGGGCGTAAAGCGCACGTAGGCGGATTGTTAAGTCAGGGGTGAAATCCCGAGGCTCAACCTCGGAACTGCCTTTGATACTGGCAATCTCGAGTCCGGAAGAGGTGAGTGGAATTCCTAGTGTAGAGGTGAAATTCGTAGATATTAGGAAGAACACCAGTGGCGAAGGCGGCTCACTGGTCCGGTACTGACGCTGAGGTG
ASV_1078	28	0	0	0	0	0	0	0	0	0	0	0	0	0	0	0	0	0	0	0	0	Bacteria	Myxococcota	Polyangia	Haliangiales	Haliangiaceae	Haliangium	NA	TACGGAGGGTGCAAACGTTGCTCGGAATCATTGGGCGTAAAGCGCACGTAGGCGGCTTGTTAAGTCGGGTGTGAAAGCCCTGGGCTCAACCCGGGAAGTGCACTCGAAACTGGCGAGCTTGAATATGGAAGAGGGTCGCGGAATTCCCGGTGTAGAGGTGAAATTCGTAGATATCGGGAGGAACACCAGTGGCGAAGGCGGCGACCTGGGCCAATATTGACGCTGAGGTGCGAAAGCGTGGGGAGC
ASV_1080	0	28	0	0	0	0	0	0	0	0	0	0	0	0	0	0	0	0	0	0	0	Bacteria	Actinobacteriota	Acidimicrobiia	NA	NA	NA	NA	TACGTAGGGAGCGAGCGTTGTCCGGATTCATTGGGCGTAAAGGGCTCGTAGGCGGCTTGGCAAGTCGGGTGTTAAAACTTCAGGCTCAACCTGGAGACGCCACCCGATACTGCCATGGCTAGAGTCCGGTAGGGGACCACGGAATTCCTGGTGTAGCGGTGAAATGCGCAGATATCAGGAGGAACACCGGTGGCGAAGGCGGTGGTCTGGGCCGGTACTGACGCTGAGGAGCGAAAGCGTGGGGAG
ASV_1081	0	0	0	0	0	0	28	0	0	0	0	0	0	0	0	0	0	0	0	0	0	Bacteria	Firmicutes	Bacilli	Alicyclobacillales	Alicyclobacillaceae	Tumebacillus	ginsengisoli	CGTTGTCCGGAATCACTGGGCGTAAAGCGCGCGCAGGCGGCGATCTACGTCCGGGGTGAAAGCCCAGAGCTCAACTCTGGGACTGCCTTGGATACGGGATCGCTTGAGGATCGGAGAGGCAAGGGGAATTCCACGTGTAGCGGTGAAATGCGTAGAGATGTGGAGGAACACCTGTGGCGAAGGCGCCTTGCTGGCCGATTTCTGACGCTGAGGCG
ASV_1082	0	0	0	0	0	0	13	0	0	0	0	0	0	0	15	0	0	0	0	0	0	Bacteria	GAL15	NA	NA	NA	NA	NA	CGTTGCCCGGATTACTGGGCGTAAAGCGGGTGTAGGCGGCCGGGTAAGTCCCGTGTGAAAGCCCACGGCTCAACCGTGGGACGTCGCGGGAAACTGCCCGGCTTGAGGGCAGCAGAGGGTGGTGGAATTCCCGGTGTAGCGGTGAAATGCGTAGAGATCGGGAGGAACGCCAGTGGCGAAGGCGGCCACCTGGGCTGTCCCTGACGCTCAGACCC
ASV_1084	0	0	0	0	0	0	0	0	0	20	0	0	8	0	0	0	0	0	0	0	0	Bacteria	Methylomirabilota	Methylomirabilia	Rokubacteriales	NA	NA	NA	CGTTGCTCGGAATCACTGGGCGTAAAGGGCGTGTAGGCGGGATGGCAAGTCGGTCGTGAAATCCTTCGGCTCAACCGAAGAAGGGCGTCCGATACTGCTGTCCTTGAGGGGTGGAGAGGAGACTGGAATTCCCGGTGTAGCGGTGAAATGTGTAGAGATCGGGAGGAACACCGGTGGCGAAGGCGGGTCTCTGGCCACTTCCTGACGCTGAGGCG
ASV_1085	0	0	0	0	0	0	0	0	0	28	0	0	0	0	0	0	0	0	0	0	0	Bacteria	NA	NA	NA	NA	NA	NA	CGTTATCCGGATTTACTGGGCGTAAAGCGCGCTAAGGCGGCCGGCTAAGTTGGGGGTGAAATCTCGGGGCTCAACCCCGGAACTGCCTCCAATACTGGTCGGCTCGAGTTCGGGAGAGGAAGGTGGAATTCCCGGTGTAGTAGTGAAATGCGTAGATATCGGGAGGAACACCAGTGGCGAAGGCGGCCTTCTGGCCCGCAATGACCGCTGTAGCG
ASV_1086	0	0	0	0	0	0	0	0	0	0	0	0	0	0	0	0	0	28	0	0	0	Bacteria	Myxococcota	Polyangia	Haliangiales	Haliangiaceae	Haliangium	NA	CGTTGCTCGGAATCATTGGGCGTAAAGCGCACGTAGGCGGCCTGTTAAGTCGGGTGTGAAATCCCTGGGCTCAACCCAGGAAGTGCACTCGAAACTGGCAGGCTTGAATATGGAAGAGGGTCGCGGAATTCCCGGTGTAGAGGTGAAATTCGTAGATATCGGGAGGAACACCAGTGGCGAAGGCGGCGACCTGGGCCAATATTGACGCTGAGGTG
ASV_1088	0	0	0	0	0	0	0	0	0	0	0	0	0	28	0	0	0	0	0	0	0	Bacteria	Actinobacteriota	Thermoleophilia	Solirubrobacterales	Solirubrobacteraceae	Conexibacter	NA	CGTTGTCCGGAATCATTGGGCGTAAAGAGCGTGTAGGCGGCTCGGTAAGTCCGCTGTGAAAGTCCAGGGCTCAACCCTGGAATGCCGGTGGAAACTGTCGAGCTAGAGTCCGGAAGAGGCGAGTGGAATTCCTGGTGTAGCGGTGAAATGCGCAGATATCAGGAGGAACACCAATGGCGAAGGCAGCTCGCTGGGACGGTACTGACGCTGAGACG
ASV_1089	27	0	0	0	0	0	0	0	0	0	0	0	0	0	0	0	0	0	0	0	0	Bacteria	Chloroflexi	Ktedonobacteria	Ktedonobacterales	Ktedonobacteraceae	FCPS473	NA	GACGTAGGGGGCGAGCGTTCTCCGGATTTACTGGGCGTAAAGCGTCCGCAGGCGGTTCAGCAAGTCTCTGCTGACAGTCCTCAGCTTAACTGAGGAAGGCGTAGGGAAACTACTGGACTTGAGACATCGAGAGGCAGAGGGAATTCCGTGTGGAGCAGTGAAATGCGTAGAGATGCGGAAGAACACCAGAGGCGAAGGCGCTCTGCTGGCGATGCTCTGACGCTCATGGACGAAAGCCAGGGGAGC
ASV_1090	0	0	0	0	14	0	0	0	0	0	0	0	0	0	0	0	0	0	0	0	13	Bacteria	Proteobacteria	Alphaproteobacteria	Caulobacterales	Caulobacteraceae	Phenylobacterium	NA	CGTTGCTCGGAATTACTGGGCGTAAAGGGCGCGTAGGCGGATATTTAAGTCGGGGGTGAAAGCCCAGGGCTCAACCCTGGAATAGCCTTCGATACTGGATATCTTGAGTTCGGGAGAGGTGAGTGGAACTCCGAGTGTAGAGGTGAAATTCGTAGATATTCGGAAGAACACCAGTGGCGAAGGCGACTCACTGGCCCGATACTGACGCTGAGGCG
ASV_1091	0	0	0	0	0	0	27	0	0	0	0	0	0	0	0	0	0	0	0	0	0	Bacteria	Proteobacteria	Alphaproteobacteria	Rhizobiales	Xanthobacteraceae	Nitrobacter	NA	CGTTGCTCGGAATCACTGGGCGTAAAGGGTGCGTAGGCGGGTTCTTAAGTCAGAGGTGAAATCCTGGAGCTCAACTCCAGAACTGCCTTTGATACTGAGAGTCTTGAGTTCGAGAGAGGTGAGTGGAACTGCGAGTGTAGAGGTGAAATTCGTAGATATTCGCAAGAACACCAGTGGCGAAGGCGGCTCACTGGCTCGATACTGACGCTGAGGCA
ASV_1092	0	0	0	0	0	0	0	0	7	0	16	0	0	0	4	0	0	0	0	0	0	Bacteria	Chloroflexi	AD3	NA	NA	NA	NA	CGTTACCCGGATTACTGGGCGTAAAGCGCGTGTAGGCGGCTGGCCAAGCGTGATGTGAAATCTTCGGGCTTAACCCGAAAACTGCATTGCGAACTGGTCTGGCTAGAGTGTGTGAGAGGGTAGTGGAATTCCCGGTGTAGCGGTGAAATGCGTAGATATCGGGAGGAACACCAGTGGCGAAGGCGGCTACCTGGCACACAACTGACGCTGAGACG
ASV_1093	0	0	0	0	0	0	0	0	0	27	0	0	0	0	0	0	0	0	0	0	0	Bacteria	Firmicutes	Clostridia	Peptostreptococcales-Tissierellales	Family XI	Anaerococcus	NA	CGTTATCCGGAATCATTGGGCGTAAAGGGTACGTAGGCGGTTAAATAAGTTAGAAGTGAAACCCCATAGCTCAACTATAGTAAGCTTCTAAAACTGTATAACTTGAGAAATGAAAGGGAAAGTGGAATTCCTAGTGTAGCGGTGAAATGCGCAGATATTAGGAGGAATACCGGTGGCGAAGGCGACTTTCTGGTCATATTCTGACGCTGAGGTAC
ASV_1094	0	0	0	0	0	0	0	0	0	27	0	0	0	0	0	0	0	0	0	0	0	Bacteria	Chloroflexi	Chloroflexia	Thermomicrobiales	JG30-KF-CM45	NA	NA	CGTTGTCCGGAATACTGGGCGTAAAGCGTGCGCAGGCGGCCCGTGAGGTGTCACGTGAAAGCCCCGGGCTCAACCCGGGAGGGTCGTGGCAAACCGGCGGGCTTGAGGCCGGTAGAGGTGGGTGGAACTCCTGGTGGAGTGGTGAAATGCGTAGAGATCAGGAAGAACACCCGTGGCGAAGGCGCCCACTGGGCCGGTACTGACGCTGAGGCACG
ASV_1095	0	0	0	0	0	0	0	0	0	0	0	0	0	0	0	10	0	6	0	0	11	Bacteria	Cyanobacteria	Vampirivibrionia	Vampirovibrionales	NA	NA	NA	CGTTGTCCGGATTTATTGGGCGTAAAGAGTTCGTAGGCGGTTTGCCAAGTCTGATGTTAAAGGCCTGAGCTTAACTCGGGTATGGCATCGGAAACTGGCAGGCTAGAGTGTGATAGAGGCAAGGGGAATTCCCGGTGTAGCGGTGAAATGCGTAGATATCGGGAGGAACACCAGTGGCGAAAGCGCCTTGCTAGGTCATTACTGACGCTGAGGAA
ASV_1096	0	0	0	0	0	0	0	0	0	0	0	0	0	0	0	8	19	0	0	0	0	Bacteria	Proteobacteria	Gammaproteobacteria	Burkholderiales	NA	NA	NA	CGTTAATCGGAATTACTGGGCGTAAAGCGTGCGCAGGCGGTTTCGTAAGACAGATGTGAAATCCCCGGGCTCAACCTGGGAACTGCATTTGTGACTGCGAGGCTAGAGTGTGTCAGAGGGGGGTGGAATTCCACGTGTAGCAGTGAAATGCGTAGAGATGTGGAGGAACACCGATGGCGAAGGCAGCCCCCTGGGATAACACTGACGCTCAGGCA
ASV_1097	0	0	0	0	0	0	0	0	0	0	0	0	3	0	0	14	0	10	0	0	0	Bacteria	NA	NA	NA	NA	NA	NA	CGTTGTTCGGAATTATTGGGCGTAAAGCGCGTGTAGGCGGCTTACTAAGTCAGATGTGAAATCCCTGGGCTCAACCGAGGAAGTGCATTTGAAACTAGTGAGCTGGAGAGTGGTAGAGGAAGGTGGAATTCCGTGTGTAGAGGTGAAATTCGTAGATACACGGAGGAATACCGGTGGCGAAGGCGGCCTTCTGGACCATTTCTGACGCTAAGACG
ASV_1098	0	0	0	0	0	0	0	0	0	0	0	0	0	0	0	0	10	17	0	0	0	Bacteria	Proteobacteria	Alphaproteobacteria	Rhizobiales	Hyphomicrobiaceae	Pedomicrobium	NA	CGTTGTTCGGAATCACTGGGCGTAAAGCGCACGTAGGCGGATGTGTCAGTCAGGGGTGAAATCCCGGGGCTCAACCTCGGAACTGCCTTTGATACAGCACGTCTTGAGTCCGGAAGAGGTGGGTGGAATTCCTAGTGTAGAGGTGAAATTCGTAGATATTAGGAAGAACACCGGTGGCGAAGGCGGCCCACTGGTCCGGTACTGACGCTGAGTGC
ASV_1099	0	0	0	0	0	0	0	0	0	0	0	0	0	0	0	0	0	0	0	12	15	Bacteria	Proteobacteria	Alphaproteobacteria	Rhizobiales	Rhizobiaceae	Aminobacter	NA	CGTTGTTCGGAATTACTGGGCGTAAAGCGCACGTAGGCGGATTGTTAAGTTAGGGGTGAAATCCCAGGGCTCAACCCTGGAACTGCCTTTAATACTGGCAATCTCGAGTCCGAGAGAGGTGAGTGGAATTCCGAGTGTAGAGGTGAAATTCGTAGATATTCGGAGGAACACCAGTGGCGAAGGCGGCTCACTGGCTCGGTACTGACGCTGAGGTG
ASV_1101	26	0	0	0	0	0	0	0	0	0	0	0	0	0	0	0	0	0	0	0	0	Bacteria	Planctomycetota	Planctomycetes	Isosphaerales	Isosphaeraceae	NA	NA	GACGAACCGTGCGAACGTTATTCGGAATCACTGGGCTTAAAGCGCGTGTAGGCGGGACGACGCGTCGGTCGCTGAAATCCCCCGGCTTAACCGGGGAACGGGCGCCGATACGGTCGGCCTCGAGGGACGTAGGGGGACCTGGAACTTCCGGTGGAGCGGTGAAATGCGTTGAGATCGGAAGGAACGCCCGTGGCGAAAGCGAGGTCCTGGACGTTTTCTGACGCTGAGACGCGAAAGCCAGGGGAG
ASV_1102	20	6	0	0	0	0	0	0	0	0	0	0	0	0	0	0	0	0	0	0	0	Bacteria	NA	NA	NA	NA	NA	NA	TACGTAGGGCCCGAGCGTTACCCGGATTTACTGGGCGTAAAGGGTCCGCAGGCGCCCGGCAAGTCGGGCGTGAAATCCCTCGGCTTAACCGAGGAACGGCGTCCGATACTACCGGGCTTGAGGACGGGAGAGGGAGGTGGAATTCCCGGAGTAGCGGTGAAATGCGTAGATACCGGGAGGAACACCGGTGGCGAAGGCGGCCTCCTGGCCCGTTCCTGACGCTCAGGGACGAAAGCGTGGGGAGCG
ASV_1103	0	26	0	0	0	0	0	0	0	0	0	0	0	0	0	0	0	0	0	0	0	Bacteria	Planctomycetota	Planctomycetes	Gemmatales	Gemmataceae	NA	NA	GACGAACCGTCCTAACGTTGTTCGGAATCACTGGGCTTAAAGGGCGCGTAGGCGGGCTCTCAAGTCCGGGGTGAAATCTTTCGGCTCAACCGGAAAATAGCCTTGGATACTGGGAGTCTCGAGGGAGGCAGGGGCGGGTGGAACTTCCGGTGGAGCGGTGAAATGCGTTGATATCGGAAGGAACGCCGGTGGCGAAAGCGACCCGCTGGACCTCTTCTGACGCTGAGGCGCGAAAGCCAGGGGAGC
ASV_1104	0	26	0	0	0	0	0	0	0	0	0	0	0	0	0	0	0	0	0	0	0	Bacteria	Proteobacteria	Alphaproteobacteria	Rhizobiales	Beijerinckiaceae	Methylovirgula	NA	TACGAAGGGGGCTAGCGTTGTTCGGAATCACTGGGCGTAAAGCGCACGTAGGCGGATTCTTAAGTCAGGGGTGAAATCCCGAGGCTCAACCTCGGAACTGCCTTTGATACTGGGGATCTCGAGTCCGGGAGAGGTGAGTGGAATTGCGAGTGTAGAGGTGAAATTCGTAGATATTCGCAAGAACACCAGTGGCGAAGGCGGCTCACTGGCCCGGTACTGACGCTGAGGTGCGAAAGCGTGGGGAGC
ASV_1105	0	0	15	0	0	11	0	0	0	0	0	0	0	0	0	0	0	0	0	0	0	Bacteria	Proteobacteria	Alphaproteobacteria	Rhizobiales	Rhizobiaceae	NA	NA	CGTTGTTCGGAATTACTGGGCGTAAAGCGCACGTAGGCGGATATTTAAGTCAAGGGTGAAATCCCGGGGCTCAACCCCGGAACTGCCTTTGATACTGGGTATCTAGAGTATGGTAGAGGTGAGTGGAATTCCGAGTGTAGAGGTGAAATTCGTAGATATTCGGAGGAACACCAGTGGCGAAGGCGGCTCACTGGACCATTACTGACGCTGAGGTG
ASV_1106	0	0	7	0	0	0	7	0	0	0	0	0	0	0	0	12	0	0	0	0	0	Bacteria	Bdellovibrionota	Oligoflexia	0319-6G20	NA	NA	NA	CGTTGTTCGGAATCATTGGGCGTAAAGCGCGTGTAGGCGGTTAGTTAAGTCGGGTGTGAAATCCCTGGGCTCAACCGAGGAAGTGCATCCGAAACTAACTAGCTAGAAGACGGTAGAGGAAGGTGGAATTCCAAGTGTAGAGGTGAAATTCGTAGATATTTGGAGGAATACCGGTGGCGAAGGCGGCCTTCTGGGCCGATCTTGACGCTGAGACG
ASV_1107	0	0	0	11	0	0	0	10	0	0	0	5	0	0	0	0	0	0	0	0	0	Bacteria	Bacteroidota	Bacteroidia	Cytophagales	Amoebophilaceae	Candidatus Amoebophilus	NA	CGTTATCCGGATTTACTGGGTTTAAAGGGTGCGTAGGCGGCTCTTTAAGTCAGTGGTGAAAGCCTAGTGCTCAACACTAGAAATGCCATTGAAACTGGAGAGCTCGAGTCAAGGAGAGGTAAGCAGAATTTATGGTGTAGCAGTGAAATGCTTAGATACCATAAGGAATACCAATAGCGAAGGCAGCTTACTGGCCTTGTACTGACGCTGAGGCA
ASV_1108	0	0	0	26	0	0	0	0	0	0	0	0	0	0	0	0	0	0	0	0	0	Bacteria	Proteobacteria	Gammaproteobacteria	Burkholderiales	Oxalobacteraceae	Massilia	NA	CGTTAATCGGAATTACTGGGCGTAAAGCGTGCGCAGGCGGTTTTGTAAGTTTGTCGTGAAATCCCCGGGCTCAACCTGGGAATGGCGATGAAGACTGCAAGGCTAGAATCTGGCAGAGGGGGGTAGAATTCCACGTGTAGCAGTGAAATGCGTAGAGATGTGGAGGAACACCGATGGCGAAGGCAGCCCCCTGGGTCAAGATTGACGCTCATGCA
ASV_1109	0	0	0	0	26	0	0	0	0	0	0	0	0	0	0	0	0	0	0	0	0	Bacteria	Myxococcota	Polyangia	Polyangiales	Polyangiaceae	Pajaroellobacter	NA	CGTTGTTCGGAATTACTGGGCGTAAAGCGTGTGTAGGCTGCTGCGTAAGTCGGATGTGAAAGCCCTGGGCTCAACCCAGGAAGTGCACTCGATACTGCGTAGCTTGAGTACCGGAGAGGTTGGTGGAATTCTCGGTGTAGAGGTGAAATTCGTAGATATCGAGAGGAACACCGGTGGCGAAGGCGGCCAACTGGACGAGTACTGACGCTGAGACA
ASV_1110	0	0	0	0	0	26	0	0	0	0	0	0	0	0	0	0	0	0	0	0	0	Bacteria	Patescibacteria	Parcubacteria	GW2011-GWA2-46-7	NA	NA	NA	CGTTACCCGGATTACTGGGCGTAAAGGACCCACAGGCGGAGGCACAAGTTATCCCTAAAAGCACTCGAGCCCAACTTGAGTGAAGAGGGATAATACTGTGTCTTTAGAGTCTGCCAGGGGCCGGCGGAACGGTCGGTGTAGGGGTGAAATCCGATGATATCGACCGGAACGCCGAAGGCGAAGGCAGCCGGCTAGGGCAGAACTGACGCTGATTG
ASV_1111	0	0	0	0	0	0	0	0	26	0	0	0	0	0	0	0	0	0	0	0	0	Bacteria	Planctomycetota	Planctomycetes	Gemmatales	Gemmataceae	NA	NA	ATGTGCAGCGCCGCGGTAAGACGAACCGTGCAAACGTTGTTCGGAATCACTGGGCTTAAAGGGCGCGTAGGCGGTCGACCAAGTCCGGGGTGAAATCTTTCGGCTTAACCGGAAAAGTGCCTTGGATACTGGCCGGCTGGAGGGAGGTAGGGGCAGGTGGAACTTCCAGTGGAGCGGTGAAATGCGTTGATATTGGAAGGAACGCCGGTGGCGAA
ASV_1112	0	0	0	0	0	0	0	0	11	15	0	0	0	0	0	0	0	0	0	0	0	Bacteria	Bacteroidota	Bacteroidia	Flavobacteriales	Weeksellaceae	Cloacibacterium	NA	CGTTATCCGGATTTATTGGGTTTAAAGGGTCCGTAGGCGGACTTATAAGTCAGTGGTGAAAGCCTGTCGCTTAACGATAGAACTGCCATTGATACTGTAAGTCTTGAGTATATTTGAGGTAGCTGGAATAAGTAGTGTAGCGGTGAAATGCATAGATATTACTTAGAACACCAATTGCGAAGGCAGGTTACCAAGATATAACTGACGCTGAGGGA
ASV_1113	0	0	0	0	0	0	0	0	0	0	26	0	0	0	0	0	0	0	0	0	0	Bacteria	Chloroflexi	Anaerolineae	SBR1031	NA	NA	NA	CGTTATCCGGATTTACTGGGCTTAAAGGGTGTGCAGGCGGGTTGGTAAGTGGTGCATGAAAGCCGCGCGCTCAACGTGCGGAGGCTGTGCCAGACTGCCAGTCTAGAGGGTGCTAGAGGAACGTGGAATTCCGGGTGTAGTGGTGAAATGCGTAGAGATCCGGAGGAATACCAGAGGCGAAGGCGACGTCCTGGGGCATACCTGACGCTCAGACA
ASV_1114	0	0	0	0	0	0	0	0	0	0	0	26	0	0	0	0	0	0	0	0	0	Bacteria	Chloroflexi	Chloroflexia	Thermomicrobiales	Thermomicrobiaceae	Sphaerobacter	NA	CGTTGTCCGGAGTTACTGGGCGTAAAGGGCGCGTAGGCGGTTGCCCGCGTCGCACGTGAAAGCCCCCGGCTCAACCGGGGAGGGTCGTGCGAGACGGGGCAACTGGAGGCAGGGAGAGGCTGGTGGAATTCCCGGTGTAGCGGTGAAATGCGTAGATATCGGGAGGAACGCCAGTGGCGAAGGCGGCTTCCTGGCCCGTTCCTGACGCTGAGACG
ASV_1115	0	0	0	0	0	0	0	0	0	0	0	0	0	0	26	0	0	0	0	0	0	Bacteria	Proteobacteria	Gammaproteobacteria	WD260	NA	NA	NA	CGTTAATCGGAATTACTGGGCGTAAAGCGCGCGTAGACGGTTTTGTAAGTCAGATGTGAAATCCCTGGGCTCAACCTGGGAACTGCATTTGAGACTGCATGGCTAGAGTATGGAAGAGGGAAGTGGAATTTCCGGTGTAGCGGTGAAATGCGTAGATATCGGAAGGAACACCAGTGGCGAAAAGCGACTTCCTGGTCCAATACTGACGTTCATGT
ASV_1116	0	0	0	0	0	0	0	0	0	0	0	0	0	0	0	0	0	26	0	0	0	Bacteria	Actinobacteriota	Acidimicrobiia	IMCC26256	NA	NA	NA	ATGTGTCAGCGCCGCGGTAATACGTAGGGGGCGAGCGTTGTCCGGATTTATTGGGCGTAAAGAGCTCGTAGGCGGTTTGGTAAGTCGGATGTGAAATCTCCACGCTCAACGTGGAGGCGCCATTCGAAACTGCCATGACTCGAGTCCGGTAGGGGAGTGTGGAATTTCCGGTGTAGCGGTGAAATGCGCAGAGATCGGAAGGAACACCCGTAGCG
ASV_1117	0	0	0	0	0	0	0	0	0	0	0	0	0	0	0	0	0	0	26	0	0	Bacteria	GAL15	NA	NA	NA	NA	NA	ATGTGCAGCGCCGCGGTAAGACGTAGGGGGCGAGCGTTGTCCGGAATCACTGGGCGTAAAGCGCGTGTAGGCGGTTCGGTAAGTCCCGTGTGAAAGCCTACGGCTCAACTGTAGGAGGCCGCGGGATACTGCCGGGCTGGAGGACGGGAGAGGGAAGTGGAATTCCCGGTGTAGCGGTGAAATGCGTAGATATCGGGAGGAACGCCAGTGGCGAA
ASV_1118	0	0	0	0	0	0	0	0	0	0	0	0	0	0	0	0	0	0	0	7	19	Bacteria	Planctomycetota	Phycisphaerae	Tepidisphaerales	WD2101 soil group	NA	NA	CGTTAGGCGGAATCACTGGGCTTAAAGCGTGTGTAGGTGGACCTGTAAGTACCTTGTGAAATCCCACGGCTTAACCGTGGAACTGCTCGGTATACTGCGGGTCTTGAGGTACCTAGGGGCGAGTGGAACAAATGGTGGAGCGGTGAAATGCGTAGATATCATTTGGAACGCCAATGGAGAAATCAGCTCGCTGGGGGTATCCTGACACTGAGACA
ASV_1119	0	0	0	0	0	0	0	0	0	0	0	0	0	0	0	0	0	0	0	0	26	Bacteria	NA	NA	NA	NA	NA	NA	CGTTGTCCGGAGTTACTGGGCGTAAAGGGTGGGTAGGCGGTTCGATGCGTCTGTGGTGAAATCTCCCGGCTTACCTGGGAGGGGGTCACGGATACGGTCGGACTTGAGGGCGTGAGAGGCAGGTAGAACTCCCGGTGGACCAGTGAAATGGGTAGAGATCGGGAAGAATACCAGTGGTGCAGACGGCCTGCTGGCGCGTACCTGACGCTGAGCCA
ASV_1120	0	0	0	0	0	0	0	0	0	0	0	0	0	0	0	0	0	0	0	0	26	Bacteria	Chloroflexi	AD3	NA	NA	NA	NA	CGTTATCCGGATTTACTGGGCGTAAAGCGCGTTAAGGCGGCCCGCTAAGTTGGGGGTGAAATTTCAGGGCTCAACCCTGAAACTGCCTCCAATACTGGCGGGCTTGAGTGCGAGAGAGGAAGGTGGAATTCCCGGTGTAGTAGTGAAATGCGTAGATATCGGGAGGAACACCAGTGGCGAAGGCGGCCTTCTGGCTCGCAACTGACGCTGTAGCG
ASV_1121	0	0	0	0	0	0	0	0	0	0	0	0	0	0	0	0	0	0	0	0	26	Bacteria	Bacteroidota	Bacteroidia	Cytophagales	Spirosomaceae	Fibrella	NA	CGTTGTCCGGATTTATTGGGTTTAAAGGGTGCGTAGGTGGCCTCTTAAGTCCGCTCTGAAAGCTGGTCGCTTAACGATCAGGGGTGGGTGGATACTGGGGGGCTTGGATCAGGTGGCGGTTTCTGGAACGGGTCGTGTAGCGGTGAAATGCATAGATATGACCCAGAACTCCAATTGCGAAGGCAGGAGGCTACGCCTGTATTGACACTGAGGCA
ASV_1123	13	12	0	0	0	0	0	0	0	0	0	0	0	0	0	0	0	0	0	0	0	Bacteria	Chloroflexi	TK10	NA	NA	NA	NA	TACGTAGGGGGCGAGCGTTGTCCGGATTTATTGGGCGTAAAGCGCGCGTAGGCGGTGCCGCAAGTCGGCCGTGAAATCGCTCAGCTCAACTGGGCGGGGTCGGGCGAGACTGCGGGGCTGGAGGCAGGCAGAGGGCCGTGGAATTCCGGGTGTAGTGGTGGAATGCGTAGAGATCCGGAGGAACACCAGTGGCGAAGGCGGCGGCCTGGGCCTGACCTGACGCTGAGGCGCGAAAGCGTGGGGAGC
ASV_1124	0	25	0	0	0	0	0	0	0	0	0	0	0	0	0	0	0	0	0	0	0	Bacteria	Chloroflexi	Chloroflexia	Thermomicrobiales	JG30-KF-CM45	NA	NA	TACGTAGGGTCCGAGCGTTGTCCGGAGTGACTGGGCGTAAAGCGCGCGCAGGCGGCTCGTGAGGCGGCACGTGAAAGCCCCGGGCTTAACTCGGGAGGGTCGTGGCGAACCAGCGAGCTTGAGGCCGGTAGAGGTGGGTGGAACTCCTGGTGGAGTGGTGAAATGCGTAGAGATCAGGAAGAACACCCGTGGCGAAGGCGCCCACTGGGCCGGTACTGACGCTGAGGCGCGAAGGCGTGGGGAGCG
ASV_1125	0	25	0	0	0	0	0	0	0	0	0	0	0	0	0	0	0	0	0	0	0	Bacteria	Proteobacteria	Alphaproteobacteria	Rhizobiales	Xanthobacteraceae	NA	NA	TACGAAGGGGGCTAGCGTTGCTCGGAATTACTGGGCGTAAAGCGCACGTAGGCGGGTCGTTAAGTCGGGGGTGAAATCCTGGAGCTCAACTCCAGAACTGCCTCCGATACTGGCGACCTCGAGTCCGGGAGAGGTGAGTGGAACTGCGAGTGTAGAGGTGAAATTCGTAGATATTCGCAAGAACACCAGTGGCGAAGGCGGCTCACTGGCCCGGTACTGACGCTGAGGTGCGAAAGCGTGGGGAGC
ASV_1126	0	0	0	0	25	0	0	0	0	0	0	0	0	0	0	0	0	0	0	0	0	Bacteria	Nitrospirota	Nitrospiria	Nitrospirales	Nitrospiraceae	Nitrospira	NA	CGTTATTCGGATTTACTGGGCGTACAGGGAGCGTAGGCGGTTCGGTAAGCCCTTTGTGAAATCTCCAGGCTTAACCTGGAACAGTCGGAGGGGACTGCCGGGCTAGAGGACGGGAGAGGAGCGCGGAATTCCCGGTGTAGCGGTGAAATGCGTAGAGATCGGGAGGAAGGCCGGTGGCGAAGGCGGCGCTCTGGAACGTTTCTGACGCTGAGGCT
ASV_1127	0	0	0	0	0	25	0	0	0	0	0	0	0	0	0	0	0	0	0	0	0	Bacteria	Chloroflexi	Ktedonobacteria	Ktedonobacterales	Ktedonobacteraceae	FCPS473	NA	GTGTCAGCGCCGCGGTAAGACGTAGGGAGCGAGCGTTGTCCGGAGTTACTGGGCGTAAAGGGCACGCAGGCGGTCGGTCGCGTTGCCACTGACAGCCGTCGGCTTAACTGACGGAGGTGGGGCAAAACGGGCCGACTTGAGGCTCAGAGAGGCAGACGGAATTCCGCGTGGAGCGGTGAAATGCGTAGAGATGCGGAAGAACACCAAAGGCGAAG
ASV_1128	0	0	0	0	0	0	6	0	0	0	0	19	0	0	0	0	0	0	0	0	0	Bacteria	Patescibacteria	Parcubacteria	GW2011-GWA2-46-7	NA	NA	NA	CGTTACCCGGATTTACTGGGCGTAAAGGACCCACAGGCGGAGGCACAAGTTATCCCTAAAAGCACTCGAGCCCAACTTGAGTGAAGAGGGATAATACTGTGTCTTTAGAGTCTGCCAGGGGCCGGCGGAACGGTCGGTGTAGGGGTGAAATCCGATGATATCGACCGGAACGCCGAAGGCGAAGGCAGCCGGCTAGGGCAGAACTGACGCTGATT
ASV_1129	0	0	0	0	0	0	25	0	0	0	0	0	0	0	0	0	0	0	0	0	0	Bacteria	Proteobacteria	Gammaproteobacteria	Burkholderiales	Oxalobacteraceae	Massilia	NA	CGTTAATCGGAATTACTGGGCGTAAAGCGTGCGCAGGCGGTTTTGTAAGTCTGACGTGAAATCCCCGGGCTCAACCTGGGAATTGCGTTGGAGACTGCAAGGCTGGAGTCTGGCAGAGGGGGGTAGAATTCCACGTGTAGCAGTGAAATGCGTAGAGATGTGGAGGAACACCGATGGCGAAGGCAGCCCCCTGGGTCAAGACTGACGCTCATGCA
ASV_1130	0	0	0	0	0	0	0	0	0	25	0	0	0	0	0	0	0	0	0	0	0	Bacteria	Acidobacteriota	Acidobacteriae	Acidobacteriales	Acidobacteriaceae (Subgroup 1)	Granulicella	NA	CGTTGTTCGGAATTATTGGGCGTAAAGGGTGCGTAGGCGGTTTGACAAGTCTCATGTGAAATCTTCGGGCTCAACCCGAAGCCTGCATGGGAAACTGTCGGGCTTGAGTATGGGAGAGGTGAGTGGAATTTCCGGTGTAGCGGTGAAATGCGTAGATATCGGAAGGAACACCTGTGGCGAAAGCGGCTCACTGGACCATAACTGACGCTGAGGCA
ASV_1131	0	0	0	0	0	0	0	0	0	0	25	0	0	0	0	0	0	0	0	0	0	Bacteria	Cyanobacteria	Cyanobacteriia	Cyanobacteriales	Nostocaceae	Mastigocladopsis PCC-10914	NA	GATGTGCAGCGCCGCGGTAATACGGAGGATGCAAGCGTTATCCGGAATGATTGGGCGTAAAGCGTCCGCAGGTGGCAATGTAAGTCTGCTGTCAAAGCGTCTGGCTCAACCAGATACAGGCAGTGGAAACTACATAGCTAGAGTAAGGTAGGGGTAGAGGGAATTCCTGGTGTAGCGGTGAAATGCGTAGAGATCAGGAAGAACACCGGTGGCGA
ASV_1132	0	0	0	0	0	0	0	0	0	0	5	0	14	0	0	0	6	0	0	0	0	Bacteria	Dependentiae	Babeliae	Babeliales	Babeliaceae	NA	NA	CGTTATTCGGAATTATTGGGCGTAAAGGGTGCGCAGACGGTTTGTTAAGTCAATTGTTTAATTCCTCGGCCTAACTGAGGGTCAGCAGTAGAAACTGATAAACTAGAGTATGAGAGAGGGAAGTGGAATTCTCGGAGTAGCGGTAAAATGCGTAGATCTCGAGAGGAACACCGATGGCGAAGGCAGCTTCCTGGCTCATTACTGACGTTCATGCA
ASV_1133	0	0	0	0	0	0	0	0	0	0	0	0	0	0	15	7	3	0	0	0	0	Bacteria	Proteobacteria	Alphaproteobacteria	Elsterales	Elsteraceae	NA	NA	CGTTGTTCGGAGTTACTGGGCGTAAAGGGCGCGTAGGCGGCCGACCCAGTCAGGTGTGAAAGCCCGGGGCTCAACCCCGGATGTGCACTTGATACTGGTTGGCTTGAGGATGGGAGAGGATGGTGGAATTCCCAGTGTAGAGGTGAAATTCGTAGATATTGGGAAGAACACCGGTGGCGAAGGCGGCCATCTGGACCATTTCTGACGCTGAGGCG
ASV_1134	0	0	0	0	0	0	0	0	0	0	0	0	0	0	0	0	25	0	0	0	0	Bacteria	Chloroflexi	JG30-KF-CM66	NA	NA	NA	NA	CGTTGTCCGGATTTATTGGGCGTAAAGCGCGCGCAGGTGGTGCGGTAAGTCCGTCGTGAAATCTCCCGGCTCAACCGGGAGGGTGCGGTGGAGACTGCCTTACTGGAGGCACTCAGAGGCCGGTGGAATTCCCGGTGTAGTGGTGAAATGCGTAGAGATCGGGAGGAACACCAGTGGCGAAGGCGGCCGGCTGGGGGTGACCTGACGCTGAGGCG
ASV_1135	0	0	0	0	0	0	0	0	0	0	0	0	0	0	0	0	0	0	0	25	0	Bacteria	Deinococcota	Deinococci	Thermales	Thermaceae	Meiothermus	NA	GATGTGTCAGCGCCGCGGTAATACGGAGGGTGCGAGCGTTACCCGGATTTACTGGGCGTAAAGGGCGTGTAGGCGGTCCTCTAAGTCCAAGGCTAAAGACTAGGGCTCAACCCTGGACCTGCCTCGGATACTGGAGGGCTCGACGGCTGGAGGGGGCAGCGGAATTTCCGGAGTAGCGGTGAAATGCGCAGATACCGGAAGGAACGCCAATAGCG
ASV_1136	0	0	0	0	0	0	0	0	0	0	0	0	0	0	0	0	0	0	0	25	0	Bacteria	NA	NA	NA	NA	NA	NA	GATGTGTCAGCGCCGCGGTAATACGTAGGGCCCGAGCGTTACCCGGATTTACTGGGCGTAAAGGGTCCGCAGGCGCCCGGCAAGTCGGGCGTGAAATCCCTCGGCTTAACCGAGGAACGGCGTCCGATACTACCGGGCTTGAGGACGGGAGAGGGAGGTGGAATTCCCGGAGTAGCGGTGAAATGCGTAGATACCGGGAGGAACACCGGTGGCGA
ASV_1137	0	0	0	0	0	0	0	0	0	0	0	0	0	0	0	0	0	0	0	0	25	Bacteria	Planctomycetota	Phycisphaerae	Tepidisphaerales	WD2101 soil group	NA	NA	CGTTAGGCGGAATCACTGGGCTTAAAGCGTGTGTAGGCGGACTTCTAAGTACCTTGTGAAATCCCACGGCTTACCCGTGGAACTGCTGGGTATACTGGGAGTCTTGAGCCGTCTAGGGGCGAGTGGAACAAATGGTGGAGCGGTGAAATGCGTAGATATCATTTGGAACGCCAATGGTGAAAACAACTCGCTGGGGACGTGCTGACGCTGAGACA
ASV_1138	0	0	0	0	0	0	0	0	0	0	0	0	0	0	0	0	0	0	0	0	25	Bacteria	Proteobacteria	Gammaproteobacteria	Gammaproteobacteria Incertae Sedis	Unknown Family	Acidibacter	NA	CGTTAATCGGAATTACTGGGCGTAAAGCGTGCGTAGACGGTTACATAAGTCGGGTGTGAAAGCCCCGGGCTCAACCTGGGAATTGCATTCGAGACTGCGTAGCTAGGGTGCGGAAGAGGGAAGCGGAATTTCCGGTGTAGCGGTGAAATGCGTAGATATCGGAAGGAACACCAGTGGCGAAAGCGGCTTCCTGGTCCAGCACCGACGTTCAGGCA
ASV_1139	0	0	0	0	0	0	0	0	0	0	0	0	0	0	0	0	0	0	0	0	25	Bacteria	Proteobacteria	Alphaproteobacteria	Rhizobiales	Beijerinckiaceae	Methylocystis	NA	CGTTGTTCGGAATCACTGGGCGTAAAGCGCACGTAGGCGGATCTTTAAGTCAGGGGTGAAATCCCGAGGCTCAACCTCGGAACTGCCTTTGATACTGGAGGTCTCGAGTCCGGGAGAGGTGAGTGGAACTGCGAGTGTAGAGGTGAAATTCGTAGATATTCGCAAGAACACCAGTGGCGAAGGCGGCTCACTGGCCCGGTACTGACGCTGAGGTG
ASV_1140	0	0	0	0	0	0	0	0	0	0	0	0	0	0	0	0	0	0	0	0	25	Bacteria	Proteobacteria	Alphaproteobacteria	Reyranellales	Reyranellaceae	Reyranella	NA	CGTTGTTCGGAATTACTGGGCGTAAAGCGAGTGTAGGTGGTTGTCCAAGTTGGATGTGAAAGCCTTGAGCTCAACTCAAGAAATGCATTCAGGACCGGGCGGCTAGAGGACCGGAGAGGATAGTGGAATTCCCAGTGTAGTGGTGAAATACGTAGAGATTGGGAAGAACACCAGTGGCGAAGGCGGCTATCTGGACGGTTTCTGACACTAAGACT
ASV_1141	0	0	0	0	0	0	0	0	0	0	0	0	0	25	0	0	0	0	0	0	0	Bacteria	Chloroflexi	JG30-KF-CM66	NA	NA	NA	NA	CGTTGTCCGGATTGATTGGGCGTAAAGCGCGCGCAGGCGGCCCGCTAAGTCCCACGTGAAATCTCCCGGCTCAACTGGGAGGGGGCGTGGGGGACTGGCGGGCTGGAGGGGCCTAGAGGCCGGTGGAACTCCCGGTGTAGTGGTGAAATGCGTAGAGATCGGGAAGAACACCAGTGGCGAAGGCGGCCGGCTGGGGGCGCCCTGACGCTGAGGCG
ASV_1142	24	0	0	0	0	0	0	0	0	0	0	0	0	0	0	0	0	0	0	0	0	Bacteria	Bdellovibrionota	Oligoflexia	0319-6G20	NA	NA	NA	TACGTAGGGTGCTAGCGTTGTTCGGAATCATTGGGCGTAAAGCGCGTGTAGGCGGTTAGTTAAGTCGGGTGTGAAATCCCTGGGCTCAACCGAGGAAGTGCATCCGAAACTAATTAGCTAGAGAGTGGTAGAGGAAGGTGGAATTCCGTGTGTAGAGGTGAAATTCGTAGATATACGGAGGAATACCGGTGGCGAAGGCGGCCTTCTGGACCATTTCTGACGCTGAGACGCGAAAGCGTGGGGAGC
ASV_1143	24	0	0	0	0	0	0	0	0	0	0	0	0	0	0	0	0	0	0	0	0	Bacteria	Proteobacteria	Alphaproteobacteria	Rhizobiales	Xanthobacteraceae	Rhodopseudomonas	NA	TACGAAGGGGGCTAGCGTTGCTCGGAATCACTGGGCGTAAAGGGTGCGTAGGCGGGTTCTTAAGTCAGAGGTGAAATCCTGGAGCTCAACTCCAGAACTGCCTTTGATACTGAGAGTCTTGAGTATGACAGAGGTGAGTGGAACTGCGAGTGTAGAGGTGAAATTCGTAGATATTCGCAAGAACACCAGTGGCGAAGGCGGCTCACTGGGTCATTACTGACGCTGAGGCACGAAAGCGTGGGGAGC
ASV_1144	0	0	0	3	0	0	6	0	0	0	0	0	0	15	0	0	0	0	0	0	0	Bacteria	Firmicutes	Bacilli	Alicyclobacillales	Alicyclobacillaceae	Alicyclobacillus	NA	CGTTGTCCGGAATCACTGGGCGTAAAGCGTGCGTAGGCGGTTTTATAAGTCTGGAGTGAAAGTCCATGGCTCAACCATGGGATTGCTCTGGAAACTGTAGAACTTGAGTGCTGGAGAGGCAAGGGGAATTCCACGTGTAGCGGTGAAATGCGTAGAGATGTGGAGGAATACCAGTGGCGAAGGCGCCTTGCTGGACAGTGACTGACGCTGAGGCA
ASV_1145	0	0	0	0	24	0	0	0	0	0	0	0	0	0	0	0	0	0	0	0	0	Bacteria	Acidobacteriota	Acidobacteriae	Subgroup 2	NA	NA	NA	TGTGTCAGCGCCGCGGTAATACGTAGGGGGCCAGCGTTGCTCGGAATTACTGGGCGTAAAGGGTTCGTAGGCGGTGCGGCAAGTCGGGGGTGAAATCTTTGGGCTTAACCCAGAGGCTGCCTTCGAAACTGCCGTGCTCGAGTGCGGGAGAGGCGAGTGGAATTGCAGGTGTAGCGGTGAAATGCGTAGATATCTGCAGGAACACCCGGGGCGAA
ASV_1146	0	0	0	0	24	0	0	0	0	0	0	0	0	0	0	0	0	0	0	0	0	Bacteria	Gemmatimonadota	Gemmatimonadetes	Gemmatimonadales	Gemmatimonadaceae	Gemmatimonas	NA	CGTTGTCCGGAATCATTGGGCGTAAAGGGCGCGTAGGTGGCGGCGTAAGCGGGCGGTGAAAGCTCGGGGCTCAACCCCGAGTCGGCCGTGCGAACTGCGTCGCTTGAGCACTGTAGAGGCAGGCGGAATTCCGGGTGTAGCGGTGGAATGCGTAGAGATCCGGAAGAACACCGGTGGCGAAGGCGGCCTGCTGGGCAGTAGCTGACACTGAGGCG
ASV_1147	0	0	0	0	24	0	0	0	0	0	0	0	0	0	0	0	0	0	0	0	0	Bacteria	Myxococcota	Polyangia	Polyangiales	Polyangiaceae	Pajaroellobacter	NA	CGTTGTTCGGAATTACTGGGCGTAAAGCGAGTGTAGGCGGTTTGATAAGTCGGATGTGAAAGCCCCGGGCTCAACCCGGGAAGTGCACTCGATACTGTCAAGCTAGAGTATCGGAGAGGTTGGTGGAATTCTCGGTGTAGAGGTGAAATTCGTAGATATCGAGAGGAACACCGGTGGCGAAGGCGGCCAACTGGACGAATACTGACGCTGAGACT
ASV_1148	0	0	0	0	24	0	0	0	0	0	0	0	0	0	0	0	0	0	0	0	0	Bacteria	Actinobacteriota	Thermoleophilia	Solirubrobacterales	Solirubrobacteraceae	Conexibacter	NA	CGTTGTCCGGAATCATTGGGCGTAAAGAGCGTGTAGGCGGCTCGATCAGTCCGCTGTGAAAGTCCAGGGCTCAACCCTGGAAAGCCGGTGGATACTGTCGGGCTAGAGTTCGGAAGAGGCGAGTGGAATTCCTGGTGTAGCGGTGAAATGCGCAGATATCAGGAGGAACACCAATGGCGAAGGCAGCTCGCTGGGACGATACTGACGCTGAGACG
ASV_1149	0	0	0	0	24	0	0	0	0	0	0	0	0	0	0	0	0	0	0	0	0	Bacteria	Proteobacteria	Alphaproteobacteria	Rhizobiales	Xanthobacteraceae	NA	NA	CGTTGCTCGGAATCACTGGGCGTAAAGCGCACGTAGGCGGACTCTTAAGTCGGTGGTGAAATCCTGGAGCTCAACTCCAGAACTGCCTTCGATACTGAGAGTCTCGAGTCCGGGAGAGGTGAGTGGAACTGCGAGTGTAGAGGTGAAATTCGTAGATATTCGCAAGAACACCAGTGGCGAAGGCGGCTCACTGGCCCGGTACTGACGCTGAGGTG
ASV_1150	0	0	0	0	24	0	0	0	0	0	0	0	0	0	0	0	0	0	0	0	0	Bacteria	Verrucomicrobiota	Verrucomicrobiae	Chthoniobacterales	Chthoniobacteraceae	NA	NA	CGTTGTTCGGATTCATTGGGCGTAAAGGGAGCGTAGGTGGTCGGGTAAGTCAGATGTCAAATTTCGATGCTCAACGTCGAACCGCATTTGATACTGCCTGGCTAGAGGAATTGAGAGGAAGCCGGAATTCACGGTGTAGCAGTGAAATGCGTAGATATCGTGAGGAAGACCAACGGCGAAAGCAGGCTTCTGGAAATTTCCTGACACTGAGCTCG
ASV_1151	0	0	0	0	0	24	0	0	0	0	0	0	0	0	0	0	0	0	0	0	0	Bacteria	Proteobacteria	Alphaproteobacteria	Rhizobiales	Beijerinckiaceae	Bosea	NA	CGTTGCTCGGAATCACTGGGCGTAAAGGGCGCGTAGGCGGACTCTTAAGTCGGGGGTGAAAGCCCAGGGCTCAACCCTGGAATTGCCTTCGATACTGGGAGTCTTGAGTTCGGAAGAGGTTGGTGGAACTGCGAGTGTAGAGGTGAAATTCGTAGATATTCGCAAGAACACCGGTGGCGAAGGCGGCCAACTGGTCCGATACTGACGCTGAGGCG
ASV_1152	0	0	0	0	0	3	0	0	0	0	0	0	0	0	0	0	0	0	0	0	21	Bacteria	Proteobacteria	Alphaproteobacteria	Acetobacterales	Acetobacteraceae	Craurococcus-Caldovatus	NA	CGTTGCTCGGAATCACTGGGCGTAAAGGGCGCGTAGGCGCCCCGCCTGTCGGGCGCGAAATCCCAGGGCTCAACCTTGGGGCTGCGCCCGAGACGGCGGGGCTGGAGTGCGGGAGAGGGCCGCGGAATTCCCAGTGTAGAGGTGAAATTCGTAGATATTGGGAAGAACACCGGTGGCGAAGGCGGCGGCCTGGCCCGCGACTGACGCTGAGGCGC
ASV_1153	0	0	0	0	0	0	0	7	0	0	0	0	0	17	0	0	0	0	0	0	0	Bacteria	Proteobacteria	Alphaproteobacteria	Acetobacterales	Acetobacteraceae	Acidiphilium	NA	CGTTGCTCGGAATGACTGGGCGTAAAGGGCGCGTAGGCGGCCTGATTTGTCGGGCGTGAAATTCCTGGGCTCAACCTGGGGACTGCGTTCGAGACGGTGGGGCTGGAGTGGGGAAGAGGGTCGTGGAATTCCCAGTGTAGAGGTGAAATTTGTAGATATTGGGAAGAACACCGGTGGCGAAGGCGGCGACCTGGTCCTTTTACTGACGCTGAGGC
ASV_1154	0	0	0	0	0	0	0	13	0	0	0	0	0	11	0	0	0	0	0	0	0	Bacteria	Actinobacteriota	Actinobacteria	Micrococcales	Microbacteriaceae	Rathayibacter	NA	CGTTGTCCGGAATTATTGGGCGTAAAGAGCTCGTAGGCGGTTTGTCGCGTCTGCTGTGAAAACCCGAGGCTCAACCTCGGGCTTGCAGTGGGTACGGGCAGACTAGAGTGCGGTAGGGGAGAATGGAATTCCTGGTGTAGCGGTGGAATGCGCAGATATCAGGAGGAACACCGATGGCGAAGGCAGTTCTCTGGGCCGTAACTGACGCTGAGGAG
ASV_1155	0	0	0	0	0	0	0	0	24	0	0	0	0	0	0	0	0	0	0	0	0	Archaea	Crenarchaeota	Nitrososphaeria	Caldiarchaeales	Terrestrial Hot Spring Gp(THSCG)	NA	NA	ATGTGCAGCGCCGCGGTAATACCAGCTCCCCGAGTGGTCGGGACGATTATTGGGCCTAAAGCATCCGTAGCCGGTCCCGTAAGTCCCCTGTTAAATCCAACGGCTCAACCGTTGGGCTGCAGGGGATACTGCGGGACTAGGGGGCGGGAGAGGCCGCCGGTATTCCCGGGGTAGGGGTAAAATCCTCTGATCCCGGGAGGACCACCAGTGGCGAA
ASV_1156	0	0	0	0	0	0	0	0	0	0	0	0	0	0	0	0	0	0	0	24	0	Bacteria	Bacteroidota	Bacteroidia	Chitinophagales	Chitinophagaceae	NA	NA	CGTTATCCGGATTTACTGGGTTTAAAGGGTGCGCAGGCGGGCGATTAAGTCAGTGGTGAAATCTTCGAGCTTAACTCGGAAACTGCCGTTGATACTAATTGTCTTGAATACTCGGGAGGTGAGCGGAATATGTCATGTAGCGGTGAAATGCTTAGATATGACATAGAACACCGATTGCGAAGGCAGCTCACTACAGAGATATTGACGCTGAGGCA
ASV_1157	0	0	0	0	0	0	0	0	0	0	0	0	0	0	0	0	0	0	0	12	12	Bacteria	Armatimonadota	Fimbriimonadia	Fimbriimonadales	Fimbriimonadaceae	NA	NA	CGTTGTCCGGATTTACTGGGCGTAAAGAGCGCGTAGGCGGCTCGTTAAGTGTGAAGCTAAATCTCCAGGCTCAACCTGGAAACTATTTCGCATACTGGCGGGCTGGAGTGATGCAGAGGTGGATAGAATTCCCGGTGTAGCGGTGAAATGCGTTGATATCGGGAGGAATACCCGTGGCGAAGGCGGTCCACTGGGCATCAACTGACGCTGAGGCG
ASV_1158	0	0	0	0	0	0	0	0	0	0	0	0	0	0	0	0	0	0	0	0	24	Bacteria	Proteobacteria	Alphaproteobacteria	NA	NA	NA	NA	CGTTGTTCGGAATTACTGGGCGTAAAGGGCGCGTAGGCGCCAATCAAGTTAGGCGTGAAATCCCTGGGCTTAACCCAGGAACTGCGTTTAATACTGATTGGCTAGAGATTGGTAGAGGAAAGTGGAATTCCTAGTGTAGAGGTGAAATTCGTAGATATTAGGAAGAACACCAGAGGCGAAGGCGACTTTCTGGGCCAATACTGACGCTGAGGCGC
ASV_1159	23	0	0	0	0	0	0	0	0	0	0	0	0	0	0	0	0	0	0	0	0	Bacteria	Verrucomicrobiota	Verrucomicrobiae	Chthoniobacterales	Chthoniobacteraceae	Candidatus Udaeobacter	NA	GTCGGGTGTGAAATCTCGGAGCTTAACTCCGAAACTGCATTCGATACTGCCGCGCTCGAGGACTGGAGAGGAGACTGGAATTCACGGTGTAGCGGTGAAATGCGTAGATATCGTGAGGAAGACCAGTGGCGAAGGCGGGTCTCTGGACAGGTCCTGACGCTGAGGCACGAAGGCCAGGGGAGCAAACGGGATTAGATACCCCGGTAGTCCTGGCAGTAAACGGTGCACGTTTGGTGTGGGAGGATT
ASV_1160	0	23	0	0	0	0	0	0	0	0	0	0	0	0	0	0	0	0	0	0	0	Bacteria	Proteobacteria	Alphaproteobacteria	Rhizobiales	Beijerinckiaceae	Methylobacterium-Methylorubrum	NA	TACGAAGGGGGCTAGCGTTGCTCGGAATCACTGGGCGTAAAGGGCGCGTAGGCGGCGTTTTAAGTCGGGGGTGAAAGCCTGTGGCTCAACCACAGAATGGCCTTCGATACTGGGACGCTTGAGTATGGTAGAGGTTGGTGGAACTGCGAGTGTAGAGGTGAAATTCGTAGATATTCGCAAGAACACCGGTGGCGAAGGCGGCCAACTGGACCATTACTGACGCTGAGGCGCGAAAGCGTGGGGAGC
ASV_1161	0	0	0	23	0	0	0	0	0	0	0	0	0	0	0	0	0	0	0	0	0	Bacteria	Chloroflexi	Ktedonobacteria	Ktedonobacterales	Ktedonobacteraceae	FCPS473	NA	TGTGTCAGCGCCGCGGTAAGACGTAGGGAGCGAGCGTTGTCCGGAGTTACTGGGCGTAAAGGGCACGCAGGCGGTCGGTCGCGTTGCCACTGACAGCCGTCGGCTTAACTGACGGAGGTGGGGCAAAACGGGCCGACTTGAGGCTCAGAGAGGCAGACGGAATTCCGCGTGGAGCGGTGAAATGCGTAGAGATGCGGAAGAACACCAAAGGCGAA
ASV_1162	0	0	0	0	23	0	0	0	0	0	0	0	0	0	0	0	0	0	0	0	0	Bacteria	Acidobacteriota	Blastocatellia	2024-11-01	NA	NA	NA	CGTTGTTCGGAATTATTGGGCGTAAAGGGCGCGTAGGCGGTCAGTTAAGTCAGCCGTGAAAGCCCGGGGCTCAACCCCGGAGGGTCGGCTGATACTGGTTGACTAGAGTACGGAAGAGGTAGCTGGAATTCCCGGTGTAGCGGTGAAATGCGTAGATATCGGGAGGAACACCAGAGGCGAAGGCGGGCTACTGGGCCGATACTGACGCTGAGGCG
ASV_1163	0	0	0	0	0	23	0	0	0	0	0	0	0	0	0	0	0	0	0	0	0	Bacteria	Armatimonadota	Chthonomonadetes	Chthonomonadales	Chthonomonadaceae	Chthonomonas	NA	GTGTCAGCGCCGCGGTAAGACGGAGGGGGCGAGCGTTGTCCGGATTTACTGGGCGTAAAGGGCGCGTAGGCGGGCTAGAGGGTCTGCTGTGAAATTTTGGGGCTCAGCCCCAAGTTGTCGGCAGAAACCGCTAGTCTTGAAGCAGCTAGGGGGAGATGGAATTACCGGTGGAGCGGTGAAATGCGTAGAGATCGGTAGGAACACCCGTGGCGAAG
ASV_1164	0	0	0	0	0	0	0	0	23	0	0	0	0	0	0	0	0	0	0	0	0	Bacteria	Proteobacteria	Gammaproteobacteria	Diplorickettsiales	Diplorickettsiaceae	Aquicella	NA	CGTTAATCGGAGTTACTGGGCGTAAAGGGCGCGTAGGCGGTAAGATGTGTGTGATGTGAAAGCCCCGGGCTTAACCTGGGAAGTGCATCGCAAACTATCTAACTGGAGTATATGAGAGGGTGGCGGAATTTCCGGTGTAGCGGTGAAATGCGTAGAGATCGGAAGGAACGTCAATGGCGAAGGCAGCCACCTGGCATAATACTGACGCTGAGGCG
ASV_1165	0	0	0	0	0	0	0	0	0	23	0	0	0	0	0	0	0	0	0	0	0	Bacteria	Proteobacteria	Gammaproteobacteria	Pseudomonadales	Moraxellaceae	Enhydrobacter	aerosaccus	CGTTAATCGGAATTACTGGGCGTAAAGCGAGTGTAGGTGGCTCATTAAGTCACATGTGAAATCCCCGGGCTTAACCTGGGAACTGCATGTGATACTGGTGGTGCTAGAATATGTGAGAGGGAAGTAGAATTCCAGGTGTAGCGGTGAAATGCGTAGAGATCTGGAGGAATACCGATGGCGAAGGCAGCTTCCTGGCATAATATTGACACTGAGAT
ASV_1166	0	0	0	0	0	0	0	0	0	23	0	0	0	0	0	0	0	0	0	0	0	Bacteria	Planctomycetota	Planctomycetes	Gemmatales	Gemmataceae	Gemmata	NA	CGTTGTTCGGAATCACTGGGCTTAAAGGGCGCGTAGGCGGGCTGTCAAGTCTGGGGTGAAATCCCGCGGCTCAACCGTGGAACTGCCTCAGATACTGACGGCCTCGAGGGAGGTAGGGGCGAGCGGAACTGTGAGTGGAGCGGTGAAATGCGTTGATATTCACAGGAACTCCGGTGGCGAAGGCGGCTCGCTGGACCTTTTCTGACGCTGAGGCG
ASV_1167	0	0	0	0	0	0	0	0	0	0	0	0	0	0	0	14	9	0	0	0	0	Bacteria	Verrucomicrobiota	Chlamydiae	Chlamydiales	Parachlamydiaceae	NA	NA	CATTAATCGGATTTATTGGGCGTAAAGGGCGCGTAGGCGGAAGCATAAGTCAGATGTGAAATCCTGAAGCTCAACTTCAGAACTGCATTTGAAACTGTGTTTCTAGAGGATAGGCGGGGAAAACGGAATTCCACAAGTAGCGGTGAAATGCGTAGATATGTGGAAGAACACCGGTGGCGAAGGCGGTTTTCTAGCTTAGACCTGACGCTGAGGCG
ASV_1168	0	0	0	0	0	0	0	0	0	0	0	0	0	0	0	0	7	0	0	6	10	Bacteria	Cyanobacteria	Cyanobacteriia	Cyanobacteriales	Nostocaceae	NA	NA	CGTTATCCGGAATGATTGGGCGTAAAGCGTCCGCAGGTGGTAGTGCAAGTCTGCCGTTAAAGATTTGGGCTTAACCCAGAAACGGCGGTGGAAACTGCACAACTAGAGTGAGGTAGGGGTAGAGGGAATTCCTGGTGTAGCGGTGAAATGCGTAGAGATCAGGAAGAACACCGGTGGCGAAAGCGCTCTACTAGGCCATCACTGACACTGAGGGA
ASV_1169	0	0	0	0	0	0	0	0	0	0	0	0	0	0	0	0	0	0	23	0	0	Bacteria	Chloroflexi	SHA-26	NA	NA	NA	NA	ATGTGTCAGCGCCGCGGTAAGACGTAGGGGGCGAGCGTTGTCCGGATTTACTGGGCGTAAAGAGCGCGTAGGCGGCTCGGCAGGTTGGGTGTGAAAGGCGCGGGCTTAACCCGCGGAGGTCATCCAAGACGGTCGGGCTGAGAGGGCAGTAGAGGAAGGTGGAATTCCGGGTGGAGTGGTGAAATGCGTAGAGATCCGGAGGAACACCGGTGGCG
ASV_1170	0	0	0	0	0	0	0	0	0	0	0	0	0	0	0	0	0	0	0	23	0	Bacteria	Patescibacteria	Parcubacteria	GW2011-GWA2-46-7	NA	NA	NA	CGTTACCCGGATTTACTGGGCGTAAAGGACCCACAGGCGGAGGTAACAAGTTATCCCTAAAAGCACTCGAGCCCAACTCGAGTGAAGAGGGATAATACTGTGCCTCTAGAGTCTGCCAGGGGCCGGCGGAACGGTCGGTGTAGGGGTGAAATCCGATGATATCGACCGGAACGCCGAAGGCGAAGGCAGCCGGCTAGGGCAGAACTGACGCTGAT
ASV_1172	0	0	0	0	0	0	0	0	0	0	0	0	0	0	0	0	0	0	0	0	23	Bacteria	Chloroflexi	Chloroflexia	Thermomicrobiales	JG30-KF-CM45	NA	NA	CGTTGTCCGGAGTGACTGGGCGTAAAGCGCGCGCAGGCGGCCTGTTAGGCGCGACGTGAAAGCCCCGGGCTCAACCCGGGAGGGTCGTCGCGAACCGGCGGGCTTGAGGCCGGTAGAGGTGGGTGGAACTCCCGGTGGAGTGGTGAAATGCGTAGAGATCGGGAAGAACACCCGTGGCGAAGGCGCCCACTGGGCCGGTGCTGACGCTGAGGCGC
ASV_1173	0	0	0	0	0	0	0	0	0	0	0	0	0	0	0	0	0	0	0	0	23	Bacteria	Proteobacteria	Alphaproteobacteria	Rhizobiales	Xanthobacteraceae	Pseudolabrys	NA	CGTTGCTCGGAATTACTGGGCGTAAAGCGCACGTAGGCGGGTTCTTAAGTCGGTGGTGAAATCCTGGAGCTCAACTCCAGAACTGCCTTCGAAACTGGGAATCTTGAGTCCGGGAGAGGTGAGTGGAACTGCGAGTGTAGAGGTGAAATTCGTAGATATTCGCAAGAACACCAGTGGCGAAGGCGGCTCACTGGCCCGGTACTGACGCTGAGGTG
ASV_1174	0	0	0	0	0	0	0	0	0	0	0	0	23	0	0	0	0	0	0	0	0	Bacteria	Actinobacteriota	Thermoleophilia	Gaiellales	NA	NA	NA	TGTGCAGCGCCGCGGTAATACGTAGGGGGCTAGCGTTGTCCGGATTTATTGGGCGTAAAGAGCGTGTAGGCGGCCAGGTAGGTCCGTTGTGAAAACTCGAGGCTCAACCTCGAGACGTCGGCGGAAACCCTCTGGCTAGAGTCCGGAAGAGGAGAGTGGAATTCCTGGTGTAGCGGTGAAATGCGCAGATATCAGGAAGAACACCCGTGGCGAAG
ASV_1175	0	0	0	0	0	0	0	0	0	0	0	0	0	23	0	0	0	0	0	0	0	Bacteria	Chloroflexi	Anaerolineae	NA	NA	NA	NA	TGTGCAGCGCCGCGGTAATACGTAGGTTGCAAGCGTTATTCGGATTTACTGGGCGTAAAGCGCACCGAGGTGGCTTCTTAAGTTGGATGTAAAATCTCCCGGCTTAACTGGGAGGCGCCATTCAAAACTGAGGAGCTTGAGGTCAGCAGGGGAAAGTGGAATTCCCGGTGTAGTGGTGGAATGCGTAGAGATCGGGAGGAACACCAGTGGCGAAA
ASV_1176	22	0	0	0	0	0	0	0	0	0	0	0	0	0	0	0	0	0	0	0	0	Bacteria	Proteobacteria	Alphaproteobacteria	Sphingomonadales	Sphingomonadaceae	NA	NA	TACGGAGGGGGCTAGCGTTGTTCAGAATTACTGGGCGTAAAGCGCACGTAGGCGGCTTCGCAAGTCAGAGGTGAAAGCCCGGAGCTTAACTCCGGAATTGCCTTTGAGACTGTGTCGCTAGAATCCGGGAGAGGTGAGTGGAATTCCGAGTGTAGAGGTGAAATTCGTAGATATTCGGAAGAACACCAGTGGCGAAGGCGGCTCACTGGACCGGTATTGACGCTGAGGTGCGAAAGCGTGGGGAGC
ASV_1177	22	0	0	0	0	0	0	0	0	0	0	0	0	0	0	0	0	0	0	0	0	Bacteria	GAL15	NA	NA	NA	NA	NA	GACGTAGGGGGCGAGCGTTGCCCGGATTTACTGGGCGTAAAGCGGGTGTAGGCGGCCGGGTAAGTCCCGTGTGAAAGCCCACGGCTCAACCGTGGGACGTCGCGGGAAACTGCCCGGCTTGAGGGCAGCAGAGGGTGGTGGAATTCCCGGTGTAGCGGTGAAATGCGTAGAGATCGGGAGGAACGCCAGTGGCGAAGGCGGCCACCTGGGCTGTCCCTGACGCTCAGACCCGAAAGCTGGGGGAGC
ASV_1178	0	22	0	0	0	0	0	0	0	0	0	0	0	0	0	0	0	0	0	0	0	Bacteria	Armatimonadota	Armatimonadia	Armatimonadales	NA	NA	NA	TACGTAGGGGGCGAGCGTTGTCCGAAGTACTGGGCGTAAAGCGCGCGTAGGCGGGTTCTTAAGTGAGAGGTGAAAGGTTCAGGGCTCAACCCGGACACTGCCTTTCATACTGGGAGCCTTGAGTGCAGGAGAGGCGAGTGGAATGGTCGGTGTAGCGGTGAAATGCGTAGATATCGATCGGAACACCCATGGCGAAGGCAGCTCGCTGGCCTGTAACTGACGCTGAGGCGCGAAAGCGTGGGGAGC
ASV_1179	0	22	0	0	0	0	0	0	0	0	0	0	0	0	0	0	0	0	0	0	0	Bacteria	Myxococcota	Polyangia	Haliangiales	Haliangiaceae	Haliangium	NA	TACAGAGGGTGCAAACGTTGCTCGGAATCATTGGGCGTAAAGCGCACGTAGGCGGCGCGTTAAGTCGGATGTGAAAGCCCCAGGCTCAACCTGGGAAGTGCATACGAAACTGGCGCGCTTGAGTATGGAAGAGGGTCGCGGAATTCCCGGTGTAGAGGTGAAATTCGTAGATATCGGGAGGAACACCAGTGGCGAAGGCGGCGACCTGGGCCAATACTGACGCTGAGGTGCGAAAGCGTGGGGAGC
ASV_1180	0	22	0	0	0	0	0	0	0	0	0	0	0	0	0	0	0	0	0	0	0	Bacteria	NA	NA	NA	NA	NA	NA	TACGTAGGAGGCAAGTGTTGTCCGGAGTACTGGGCGTAAAGCGTGTGTAGGCGGTGGTGTTTGTCTGGTGTGAAATCTCCCGGCTTACCTGGGAGGGGGCATCGGGAAACGGCAGCACTTGAGGGCATCAGAGGCCAGTAGAACTCCCGGTGTAGCGGTGAAATGCGTAGATATCGGGAGGAACACCAGAGGCGAAGGCGGCTTCCTGGCCTGAACCTGACACTGAGACGCGAAAGCGTGGGGAGC
ASV_1181	0	0	22	0	0	0	0	0	0	0	0	0	0	0	0	0	0	0	0	0	0	Bacteria	Armatimonadota	Chthonomonadetes	Chthonomonadales	Chthonomonadaceae	Chthonomonas	NA	TGTGCAGCGCCGCGGTAAGACGGAGGGGGCGAGCGTTGTCCGGATTTACTGGGCGTAAAGGGCGCGTAGGCGGGCTAGAGGGTCTGCTGTGAAATTTTGGGGCTCAGCCCCAAGTTGTCGGCAGAAACCGCTAGTCTTGAAGCAGCTAGGGGGAGATGGAATTACCGGTGGAGCGGTGAAATGCGTAGAGATCGGTAGGAACACCCGTGGCGAAG
ASV_1182	0	0	0	8	0	0	14	0	0	0	0	0	0	0	0	0	0	0	0	0	0	Bacteria	Chloroflexi	Chloroflexia	Elev-1554	NA	NA	NA	CGTTGTCCGGAATACTGGGCGTAAAGCGCGCGTAGGCGGTCTTTCGCGTAGGCGGTGAAAGCCCCCGGCTCACCTGGGGGAGGTCCGGCCTAAACGGGGAGACTGGAGGGCGGTAGGGGCTGGCGGAACGCCCGGAGTAGCGGTGAAATGCGTTGAGATCGGGCAGAACACCAGTGGCGAAGGCGGCCGGCTGGGCCGACCCTGACGCTGAGGCG
ASV_1183	0	0	0	0	16	0	0	0	0	0	0	0	6	0	0	0	0	0	0	0	0	Bacteria	Chloroflexi	Ktedonobacteria	B12-WMSP1	NA	NA	NA	CGTTGTCCGGAATTACTGGGCGTAAAGAGTGCGTAGGCGGCGCAGTACGACCTGTGTGAAAGCCCCCGGCTCAACTGGGGAGGGTCATGGGTAACGGCTGTGCTGTGAGTACAGGAGAGGGAAGTGGAACTCCGGGAGTAGCGGTGAAATGCGTAGAGACCCGGAGGAACACCGGTGGCGAAGGCGGCTTCCTGGCCTGTGACTGACGCTGTGGC
ASV_1184	0	0	0	0	11	0	0	0	0	0	7	0	4	0	0	0	0	0	0	0	0	Bacteria	Bacteroidota	Bacteroidia	Chitinophagales	Chitinophagaceae	NA	NA	CGTTATCCGGATTCACTGGGTTTAAAGGGTGCGTAGGCGGGCGAGAAAGTCCGTGGTGAAATCTCTGAGCTTAACTCAGAAACTGCCATGGATACTATTTGTCTTGAATACTGTGGAGGTGAGCGGAATATGTCATGTAGCGGTGAAATGCTTAGATATGACATAGAACACCAATTGCGAAGGCAGCTCACTACACAATAATTGACGCTGAGGCA
ASV_1185	0	0	0	0	0	14	8	0	0	0	0	0	0	0	0	0	0	0	0	0	0	Bacteria	Planctomycetota	Planctomycetes	Gemmatales	Gemmataceae	NA	NA	CGTTGTTCGGAATCACTGGGCTTAAAGGGCGCGTAGGCGGGTTGCCAAGTCCGGGGTGAAAGCCTCCAGCTCAACTGGAGAAGTGCCTTGGATACTGGTGGTCTCGAGGGAGGTAGGGGCATGCGGAACTTCCGGTGGAGCGGTGAAATGCGTAGATATCGGAAGGAACGCCGGTGGCGAAAGCGGCGTGCTGGACCTCTTCTGACGCTGAGGCG
ASV_1186	0	0	0	0	0	0	22	0	0	0	0	0	0	0	0	0	0	0	0	0	0	Bacteria	Armatimonadota	Armatimonadia	Armatimonadales	NA	NA	NA	CGTTGTCCGAAGTTACTGGGCGTAAAGAGCGCGTAGGCGGGTCTTTAAGTGAGGGGTGAAAGGTTCGGGCTCAACCCGGACACTGCCTTTCATACTGGGGACCTTGAGTATGGGAGAGGCGAGTGGAATTCTTGGTGTAGCGGTGAAATGCGTAGATATCAAGAGGAACACCCATGGCGAAGGCAGCTCGCTGGCCTATAACTGACGCTGAGGCG
ASV_1187	0	0	0	0	0	0	22	0	0	0	0	0	0	0	0	0	0	0	0	0	0	Bacteria	Bacteroidota	Bacteroidia	Chitinophagales	Chitinophagaceae	NA	NA	ATGTGTCAGCAGCCGCGATAATACGGAGGGTGCAAGCGTTATCCGGATTCACTGGGTTTAAAGGGTGCGTAGGTGGGCAGGTAAGTCAGTGGTGAAATCTCCGAGCTTAACTCGGAAACTGCCGTTGATACTATTTGTCTTGAATATTGTGGAGGTAAGCGGAATATGTCATGTAGCGGTGAAATGCTTAGATATGACATAGAACACCAATTGCG
ASV_1188	0	0	0	0	0	0	22	0	0	0	0	0	0	0	0	0	0	0	0	0	0	Bacteria	Planctomycetota	Planctomycetes	Isosphaerales	Isosphaeraceae	Aquisphaera	NA	CGTTATTCGGAATCACTGGGCTTAAAGCGCGTGTAGGCGGATGGGAACGTCGGACCTTGAAAGCCCCCGGCTCAACCGGGGAAGAGGGGCCGAAACGACCCGTCTGGAGGGACGTAGGGGGATCTGGAACTTCCGGTGGAGCGGTGAAATGCGTTGAGATCGGAAGGAACGCCCGTGGCGAAAGCGAGATCCTGGACGTTTACTGACGCTGAGAC
ASV_1189	0	0	0	0	0	0	8	7	0	0	0	0	0	7	0	0	0	0	0	0	0	Bacteria	Proteobacteria	Alphaproteobacteria	Acetobacterales	Acetobacteraceae	NA	NA	CGTTGCTCGGAATGACTGGGCGTAAAGGGCGCGTAGGCGGTTTGTACAGTCAGATGTGAAATTCCCGGGCTCAACCTGGGGGCTGCATTTGATACGTATGGACTTGAGTTCGGAAGAGGGTCGTGGAATTCCCAGTGTAGAGGTGAAATTCGTAGATATTGGGAAGAACACCGGTGGCGAAGGCGGCGACCTGGTCCGATACTGACGCTGAGGCG
ASV_1190	0	0	0	0	0	0	0	22	0	0	0	0	0	0	0	0	0	0	0	0	0	Bacteria	Proteobacteria	Gammaproteobacteria	Xanthomonadales	Rhodanobacteraceae	Chujaibacter	NA	GATGTGTCAGCGCCGCGGTAATACGGAGGGTGCAAGCGTTAATCGGAATTACTGGGCGTAAAGCGTGCGCAGGCGGTTTGTTAAGTCCGTTGTGAAAGCCCCGAGCTCAACTTGGGAATTGCAGTGGATACTGGCAGGCTGGAGTACGGTAGAGGAAGGTGGAATTCCCGGTGTAGCAGTGAAATGCGTAGATATCGGGAGGAACACCAGTGGCG
ASV_1191	0	0	0	0	0	0	0	0	22	0	0	0	0	0	0	0	0	0	0	0	0	Bacteria	Deinococcota	Deinococci	Thermales	Thermaceae	Meiothermus	NA	CGTTACCCGGATTTACTGGGCGTAAAGGGCGTGTAGGCGGTCCTCTAAGTCCAAGGCTAAAGACTAGGGCTCAACCCTGGACCTGCCTCGGATACTGGAGGGCTCGACGGCTGGAGGGGGCAGCGGAATTTCCGGAGTAGCGGTGAAATGCGCAGATACCGGAAGGAACGCCAATAGCGAAGCAGCTGCCTGGACAGTACGTGACGCTGAGGCGC
ASV_1192	0	0	0	0	0	0	0	0	0	22	0	0	0	0	0	0	0	0	0	0	0	Bacteria	Chloroflexi	Ktedonobacteria	Ktedonobacterales	Ktedonobacteraceae	G12-WMSP1	NA	ATGTGTCAGCGCCGCGGTAATACGTAGGGGGCGAGCGTTGTCCGGATTTATTGGGCGTAAAGGGCACGCAGGCGGTCTGCCGCATTCGCGGTGACAGTTTTCGGCTTCCCTGAGAAAGGGTCGCGACGATGGGCAGACTTGAGGACCAGAGAGGAAACGGGAACTCCGGGTGGAGTGGTGAAATGCGTAGATATCCGGAAGAACACCCATGGCGA
ASV_1193	0	0	0	0	0	0	0	0	0	22	0	0	0	0	0	0	0	0	0	0	0	Bacteria	Actinobacteriota	Thermoleophilia	Solirubrobacterales	Solirubrobacteraceae	NA	NA	CGTTGTCCGGAATCATTGGGCGTAAAGAGCGTGTAGGCGCCCCGGTCAGTCCGCCGTGAAAGTCCAGGGCTCAACCCTGGAATGCCGGTGGATACTGCCGGGCTAGAGTCCGGAAGAGGCGAGTGGAATTCCTGGTGTAGCGGTGAAATGCGCAGATATCAGGAGGAACACCAATGGCGAAGGCAGCTCGCTGGGACGGTACTGACGCTGAGACG
ASV_1194	0	0	0	0	0	0	0	0	0	0	22	0	0	0	0	0	0	0	0	0	0	Bacteria	Bdellovibrionota	Oligoflexia	0319-6G20	NA	NA	NA	CGTTGCTCGGAATTATTGGGCGTAAAGGGTAGGTAGGTGGTCTCATTTGTCTAGGGTGAAAGCCTTGAGCTTAACTCAAGAAGTGCCCTAGAAACGGTGAGACTGGAGTCTTGGAGAGGGTTGTGGAATTCCCGGTGTAGCGGTGAAATGCGTAGAGATCGGGAGGAACACCAGCGGCGAAGGCGGCAACCTGGACAAGTACTGACACTCAACTA
ASV_1195	0	0	0	0	0	0	0	0	0	0	0	13	0	0	0	0	0	0	9	0	0	Bacteria	Firmicutes	YNPFFP2	NA	NA	NA	NA	CGTTGTCCGGAATCACTGGGCGTAAAGGGCGTGTAGGCGGCCTCTTAAGTCGGGTGTGAAAGACCAGGGCTCAACCCTGGGGGGACATTCGAAACTGGGGGGCTTGAGGGTAGTAGAGGAGAGCGGAATTCCCGGTGTAGCGGTAAAATGCGTAGATATCGGGAGGAACACCAGTGGCGAAGGCGGCTCTCTGGGCTATCCCTGACGCTGAGGCG
ASV_1196	0	0	0	0	0	0	0	0	0	0	0	0	0	0	22	0	0	0	0	0	0	Bacteria	Planctomycetota	Planctomycetes	Isosphaerales	Isosphaeraceae	NA	NA	CGTTATTCGGAATCACTGGGCTTAAAGCGCGTGTAGGCGGCCCGGCACGTCGAGCGTTGAAAGCCCCCCGGCTCAACCGGGGAAGCGGCCTCGATACGACCGGGCTGGAGGGGGGTAGGGGGAGCCGGAACTTCCGGTGGAGCGGTGAAATGCGTTGAGATCGGAAGGAACGCCCGCGGCGAAAGCGGGCTCCTGGACCCCGCCTGACGCTGAGA
ASV_1197	0	0	0	0	0	0	0	0	0	0	0	0	0	0	0	0	22	0	0	0	0	Bacteria	Dependentiae	Babeliae	Babeliales	Vermiphilaceae	NA	NA	CGTTATTCGGATTAATTGGGCGTAAAGGGTGCGCAGACGGTTTGTTAAGTCACTTGTTAAATTCTTCGGCCTAACTGAAGGTGTGCGAGTGATACTGGCGAACTAGAGGGTGGAAGAGAGAAGTGGAATTCTCGGAGTAGCGGTAAAATGCGTAGATCTCGAGAGGAACACCAATGGCGAAGGCAGCTTCTTGGTCCATTCCTGACGTTCATGCA
ASV_1198	0	0	0	0	0	0	0	0	0	0	0	0	0	0	0	0	0	0	0	0	22	Bacteria	Bacteroidota	Bacteroidia	Chitinophagales	Chitinophagaceae	Ferruginibacter	NA	CGTTATCCGGATTTACTGGGTTTAAAGGGTGCGTAGGTGGGTCGGTAAGTCAGCGGTGAAATCTTCGAGCTTAACTCGGAAACTGCCATTGATACTATCGATCTTGAATCATCTAGAGGTAAGCGGAATATGTCATGTAGCGGTGAAATGCTTAGATATGACATAGAACACCAATTGCGAAGGCAGCTTACTATGGATGCATTGACACTGAGGCA
[truncated: 734 more rows]
